# Supplementary material for: Using Genomic and Transcriptome Analyses to Identify the Role of the Oxidative Stress Pathway in Renal Clear Cell Carcinoma and Its Potential Therapeutic Significance
Source: Hindawi journal article supplement (doi:10.1155/2021/5561124), 2021-01-01
Supplement: f1 [file 5561124.f1.pdf]

## Supplementary Materials Figures and Legends

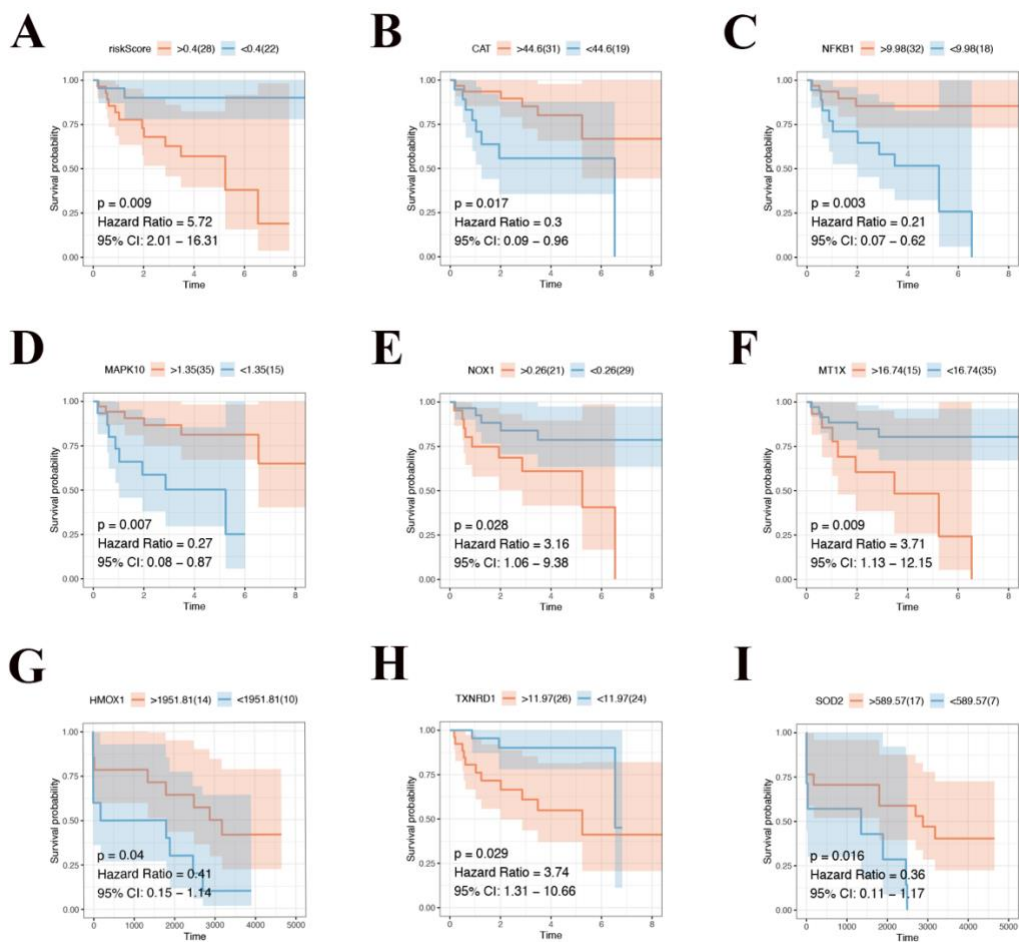

**Figure S1:** The results of internal random sampling verification. (A-I) RiskScore, CAT, NFKB1, MAPK10, NOX1, MT1X, HMOX1, TXNRD1 and SOD2.

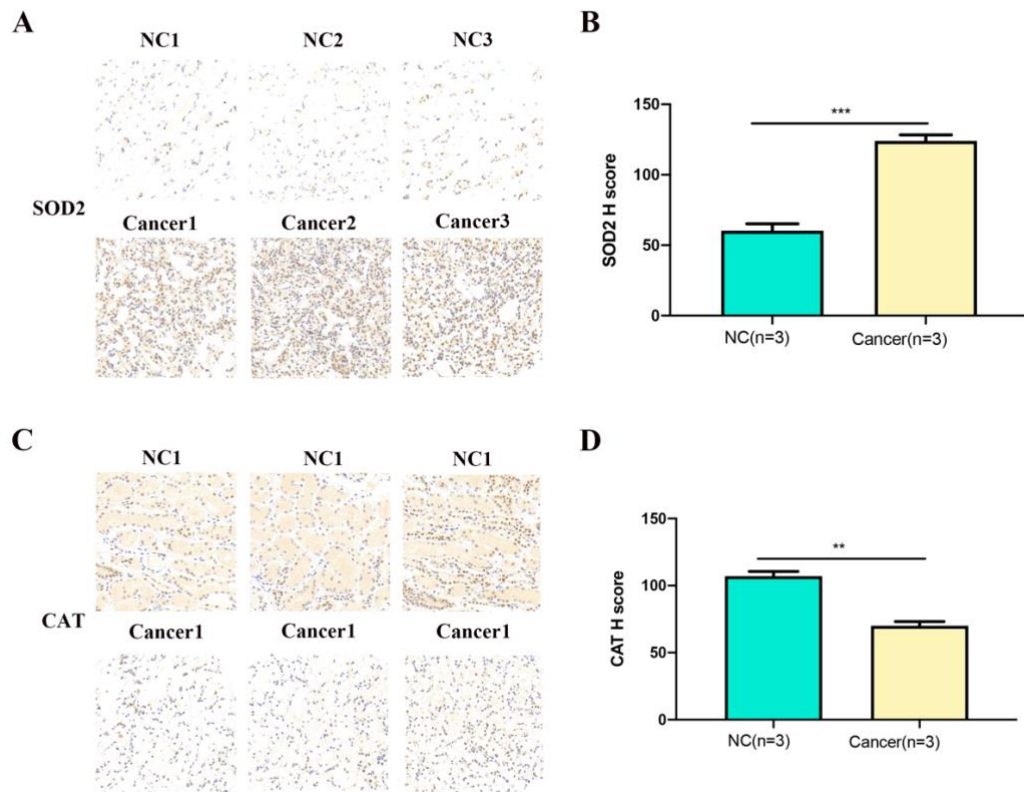

**Figure S2:** The results of immunohistochemistry experiments on SOD2 and CAT. (A-D) Typical immunohistochemical images of SOD2 and CAT in kidney cancer tissue and normal kidney tissue, and the corresponding semi-quantitative histogram. \*\*\* $p < 0.001$ .

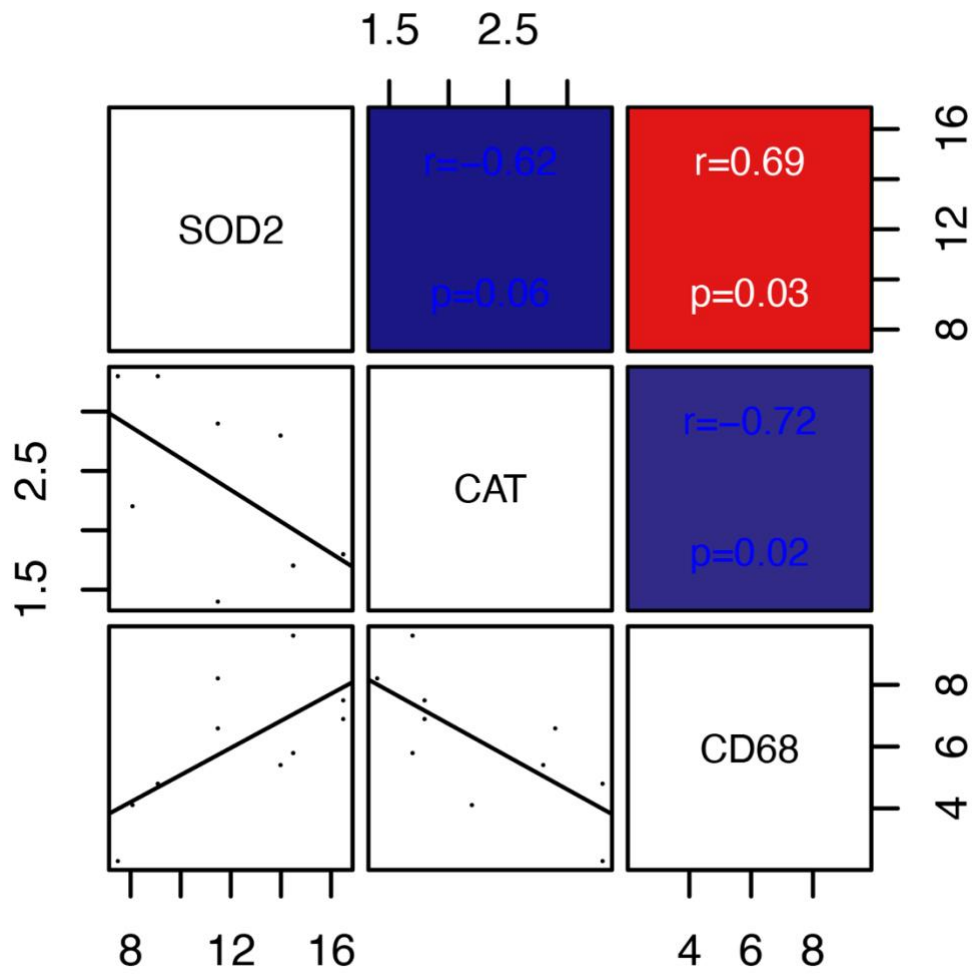

**Figure S3:** The heat map shows the correlation between SOD2, CAT and the macrophage marker CD68.

**Table S1: CNV amplification frequency of oxidative stress pathway genes across 32 cancer types**

|        | ACC         | BLCA        | BRCA        | CESC        | CHOL        |             |
|--------|-------------|-------------|-------------|-------------|-------------|-------------|
| CAT    | 0.011111111 | 0.043478261 | 0.102155576 | 0.032653061 |             | 0           |
| CYBB   | 0.022222222 | 0.055555556 | 0.026241799 | 0.057142857 |             | 0           |
| CYP1A1 | 0.066666667 | 0.028985507 | 0.038425492 | 0.106122449 | 0.03030303  |             |
| FOS    | 0.155555556 | 0.038647343 | 0.026241799 | 0.102040816 |             | 0           |
| GCLC   | 0.122222222 | 0.084541063 | 0.119962512 | 0.134693878 | 0.121212121 |             |
| GPX1   | 0.022222222 | 0.060386473 | 0.010309278 | 0.008163265 |             | 0           |
| GPX3   | 0.544444444 | 0.004830918 | 0.047797563 | 0.044897959 | 0.121212121 |             |
| GSR    | 0.311111111 | 0.033816425 | 0.070290534 | 0.032653061 | 0.03030303  |             |
| HMOX1  | 0.022222222 | 0.060386473 | 0.030927835 | 0.040816327 |             | 0           |
| JUNB   | 0.477777778 | 0.02173913  | 0.049671978 | 0.048979592 |             | 0           |
| MAOA   | 0.033333333 | 0.050724638 | 0.031865042 | 0.065306122 |             | 0           |
| MAPK10 | 0.288888889 | 0.041062802 | 0.032802249 | 0.016326531 |             | 0           |
| MAPK14 | 0.122222222 | 0.053140097 | 0.099343955 | 0.134693878 | 0.151515152 |             |
| MGST1  | 0.611111111 | 0.089371981 | 0.085285848 | 0.057142857 | 0.090909091 |             |
| MT1X   | 0.411111111 | 0.031400966 | 0.031865042 | 0.057142857 |             | 0           |
| NFE2L2 | 0.033333333 | 0.041062802 | 0.030927835 | 0.048979592 | 0.090909091 |             |
| NFIX   | 0.488888889 | 0.036231884 | 0.066541706 | 0.06122449  | 0.060606061 |             |
| NFKB1  | 0.255555556 | 0.012077295 | 0.035613871 | 0.032653061 |             | 0           |
| NOX1   | 0           | 0.026570048 | 0.0131209   | 0.020408163 |             | 0           |
| NOX3   | 0.133333333 | 0.007246377 | 0.043111528 | 0.024489796 | 0.03030303  |             |
| NOX4   | 0.022222222 | 0.074879227 | 0.053420806 | 0.06122449  |             | 0           |
| NOX5   | 0.066666667 | 0.019323671 | 0.035613871 | 0.093877551 | 0.03030303  |             |
| NQO1   | 0.4         | 0.082125604 | 0.029990628 | 0.073469388 | 0.03030303  |             |
| SOD1   | 0.177777778 | 0.106280193 | 0.06185567  | 0.040816327 |             | 0           |
| SOD2   | 0.122222222 | 0.009661836 | 0.044985942 | 0.024489796 | 0.03030303  |             |
| SOD3   | 0.288888889 | 0.024154589 | 0.016869728 | 0.012244898 | 0.060606061 |             |
| SP1    | 0.6         | 0.038647343 | 0.044048735 | 0.040816327 | 0.090909091 |             |
| TXN2   | 0.011111111 | 0.04589372  | 0.029990628 | 0.032653061 |             | 0           |
| TXNRD1 | 0.6         | 0.057971014 | 0.050609185 | 0.028571429 | 0.060606061 |             |
| TXNRD2 | 0.022222222 | 0.043478261 | 0.026241799 | 0.040816327 |             | 0           |
| UGT1A6 | 0.055555556 | 0.002415459 | 0.007497657 |             | 0           | 0.060606061 |
| XDH    | 0.044444444 | 0.120772947 | 0.057169634 | 0.130612245 | 0.03030303  |             |

| COAD        | DLBC        | ESCA        | GBM         | HNSC        | KICH        |
|-------------|-------------|-------------|-------------|-------------|-------------|
| 0.028056112 | 0.068965517 | 0.177083333 | 0.012738854 | 0.060344828 | 0.287878788 |
| 0.014028056 | 0.034482759 | 0.020833333 | 0.00477707  | 0           | 0           |
| 0.008016032 | 0.034482759 | 0.052083333 | 0.01433121  | 0.025862069 | 0.409090909 |
| 0.008016032 | 0.068965517 | 0.135416667 | 0.011146497 | 0.077586207 | 0.46969697  |
| 0.056112224 | 0.103448276 | 0.083333333 | 0.01433121  | 0.112068966 | 0.03030303  |
| 0.008016032 | 0.137931034 | 0           | 0.038216561 | 0           | 0.303030303 |
| 0.01002004  | 0.068965517 | 0           | 0.01433121  | 0           | 0.333333333 |
| 0.100200401 | 0.034482759 | 0.104166667 | 0.02388535  | 0.051724138 | 0.196969697 |
| 0.012024048 | 0           | 0.0625      | 0.00477707  | 0.068965517 | 0.242424242 |
| 0.03006012  | 0           | 0.052083333 | 0.281847134 | 0.051724138 | 0.318181818 |
| 0.012024048 | 0.034482759 | 0.03125     | 0.003184713 | 0.017241379 | 0           |
| 0.008016032 | 0.034482759 | 0.041666667 | 0.022292994 | 0.00862069  | 0.424242424 |
| 0.062124248 | 0.103448276 | 0.03125     | 0.00955414  | 0.043103448 | 0.03030303  |
| 0.126252505 | 0.034482759 | 0.239583333 | 0.070063694 | 0.189655172 | 0.318181818 |
| 0.086172345 | 0.034482759 | 0.09375     | 0.017515924 | 0.034482759 | 0.318181818 |
| 0.022044088 | 0           | 0.229166667 | 0.012738854 | 0.120689655 | 0.060606061 |
| 0.034068136 | 0           | 0.083333333 | 0.28343949  | 0.043103448 | 0.333333333 |
| 0.008016032 | 0           | 0.03125     | 0.017515924 | 0           | 0.439393939 |
| 0.014028056 | 0.034482759 | 0.114583333 | 0.006369427 | 0.025862069 | 0           |
| 0.04008016  | 0.034482759 | 0.041666667 | 0.01433121  | 0.025862069 | 0.03030303  |
| 0.018036072 | 0.103448276 | 0.125       | 0.020700637 | 0.043103448 | 0.242424242 |
| 0.008016032 | 0.034482759 | 0.041666667 | 0.011146497 | 0.025862069 | 0.454545455 |
| 0.082164329 | 0.034482759 | 0.09375     | 0.012738854 | 0.051724138 | 0.272727273 |
| 0.02004008  | 0.068965517 | 0.041666667 | 0.050955414 | 0.00862069  | 0.090909091 |
| 0.036072144 | 0.068965517 | 0.041666667 | 0.011146497 | 0.025862069 | 0.03030303  |
| 0.006012024 | 0           | 0.03125     | 0.02388535  | 0.00862069  | 0.46969697  |
| 0.094188377 | 0.034482759 | 0.020833333 | 0.047770701 | 0.017241379 | 0.46969697  |
| 0.016032064 | 0           | 0.0625      | 0.006369427 | 0.077586207 | 0.378787879 |
| 0.070140281 | 0.103448276 | 0.052083333 | 0.036624204 | 0.025862069 | 0.5         |
| 0.006012024 | 0           | 0.0625      | 0.012738854 | 0.077586207 | 0.257575758 |
| 0.028056112 | 0           | 0.010416667 | 0.012738854 | 0.017241379 | 0.015151515 |
| 0.022044088 | 0.034482759 | 0.135416667 | 0.025477707 | 0.060344828 | 0.045454545 |

| KIRC        | KIRP        | LGG         | LIHC        | LUAD        | LUSC        |
|-------------|-------------|-------------|-------------|-------------|-------------|
| 0.01188455  | 0.026315789 | 0.024390244 | 0.023746702 | 0.063706564 | 0.053435115 |
| 0.016977929 | 0.003289474 | 0.015009381 | 0.005277045 | 0.021235521 | 0.030534351 |
| 0.005093379 | 0.006578947 | 0.015009381 | 0.042216359 | 0.028957529 | 0.041984733 |
| 0.008488964 | 0.003289474 | 0.003752345 | 0.021108179 | 0.061776062 | 0.061068702 |
| 0.005093379 | 0.023026316 | 0.009380863 | 0.221635884 | 0.108108108 | 0.124045802 |
| 0.008488964 | 0.131578947 | 0.005628518 | 0.039577836 | 0.001930502 | 0           |
| 0.341256367 | 0.082236842 | 0.009380863 | 0.163588391 | 0.040540541 | 0.003816794 |
| 0.001697793 | 0.055921053 | 0.039399625 | 0.021108179 | 0.028957529 | 0.030534351 |
| 0.01188455  | 0.009868421 | 0.020637899 | 0.052770449 | 0.027027027 | 0.158396947 |
| 0.016977929 | 0.013157895 | 0.052532833 | 0.029023747 | 0.003861004 | 0.066793893 |
| 0.015280136 | 0.003289474 | 0.011257036 | 0.021108179 | 0.040540541 | 0.036259542 |
| 0.006791171 | 0.009868421 | 0.00750469  | 0.013192612 | 0.00965251  | 0.028625954 |
| 0.005093379 | 0.009868421 | 0.015009381 | 0.245382586 | 0.127413127 | 0.045801527 |
| 0.045840407 | 0.325657895 | 0.045028143 | 0.023746702 | 0.086872587 | 0.188931298 |
| 0.037351443 | 0.378289474 | 0.015009381 | 0.013192612 | 0.055984556 | 0.036259542 |
| 0.052631579 | 0.065789474 | 0.003752345 | 0.07651715  | 0.065637066 | 0.124045802 |
| 0.016977929 | 0.023026316 | 0.067542214 | 0.047493404 | 0.015444015 | 0.064885496 |
| 0.005093379 | 0.013157895 | 0.005628518 | 0.01055409  | 0.005791506 | 0.011450382 |
| 0.008488964 | 0.006578947 | 0.011257036 | 0.055408971 | 0.034749035 | 0.040076336 |
| 0.001697793 | 0.006578947 | 0           | 0.034300792 | 0.007722008 | 0.051526718 |
| 0.01188455  | 0.029605263 | 0.05065666  | 0.029023747 | 0.088803089 | 0.06870229  |
| 0.008488964 | 0.006578947 | 0.015009381 | 0.029023747 | 0.023166023 | 0.051526718 |
| 0.040747029 | 0.358552632 | 0.013133208 | 0.01055409  | 0.067567568 | 0.028625954 |
| 0.030560272 | 0.042763158 | 0.020637899 | 0.023746702 | 0.046332046 | 0.028625954 |
| 0.001697793 | 0.009868421 | 0           | 0.036939314 | 0.007722008 | 0.049618321 |
| 0.006791171 | 0.006578947 | 0.013133208 | 0.044854881 | 0.05019305  | 0.011450382 |
| 0.0475382   | 0.282894737 | 0.003752345 | 0.034300792 | 0.090733591 | 0.049618321 |
| 0.01188455  | 0.009868421 | 0.015009381 | 0.052770449 | 0.025096525 | 0.15648855  |
| 0.045840407 | 0.309210526 | 0.011257036 | 0.034300792 | 0.048262548 | 0.026717557 |
| 0.013582343 | 0.009868421 | 0.013133208 | 0.026385224 | 0.032818533 | 0.154580153 |
| 0.03565365  | 0.046052632 | 0.003752345 | 0.029023747 | 0.032818533 | 0.009541985 |
| 0.018675722 | 0.046052632 | 0.00750469  | 0.044854881 | 0.065637066 | 0.185114504 |

| MESO        | OV          | PAAD        | PCPG        | PRAD        | READ        |             |
|-------------|-------------|-------------|-------------|-------------|-------------|-------------|
| 0.011627907 | 0.12718601  | 0.020134228 |             | 0.02        | 0.00811359  | 0.012048193 |
| 0           | 0.06200318  | 0.013422819 | 0.006666667 | 0.012170385 | 0.084337349 |             |
| 0.11627907  | 0.085850556 | 0.026845638 | 0.046666667 | 0.002028398 | 0.012048193 |             |
| 0.011627907 | 0.082670906 | 0.020134228 |             | 0.02        | 0.006085193 | 0.012048193 |
| 0.034883721 | 0.209856916 | 0.006711409 | 0.066666667 | 0.004056795 | 0.144578313 |             |
| 0.034883721 | 0.100158983 | 0           |             | 0.02        | 0.006085193 | 0.024096386 |
| 0.069767442 | 0.112877583 | 0.013422819 | 0.026666667 | 0.010141988 | 0.060240964 |             |
| 0.058139535 | 0.058823529 | 0.020134228 | 0.033333333 | 0.024340771 | 0.036144578 |             |
| 0.011627907 | 0.060413355 | 0.006711409 |             | 0           | 0           | 0.024096386 |
| 0.081395349 | 0.310015898 | 0           |             | 0.06        | 0.004056795 | 0.048192771 |
| 0           | 0.101748808 | 0.013422819 | 0.006666667 | 0.006085193 | 0.048192771 |             |
| 0           | 0.036565978 | 0           | 0.026666667 | 0.010141988 | 0.012048193 |             |
| 0.058139535 | 0.302066773 | 0.006711409 | 0.066666667 | 0.006085193 | 0.072289157 |             |
| 0.034883721 | 0.383147854 | 0.046979866 | 0.026666667 | 0.010141988 | 0.13253012  |             |
| 0.034883721 | 0.050874404 | 0.013422819 |             | 0.02        | 0.006085193 | 0.084337349 |
| 0.023255814 | 0.262321145 | 0.020134228 | 0.006666667 | 0.002028398 | 0.048192771 |             |
| 0.093023256 | 0.362480127 | 0.013422819 | 0.073333333 | 0.016227181 | 0.048192771 |             |
| 0           | 0.020667727 | 0           | 0.026666667 | 0.006085193 | 0.024096386 |             |
| 0           | 0.101748808 | 0.006711409 |             | 0           | 0           | 0           |
| 0           | 0.057233704 | 0           | 0.013333333 | 0.006085193 | 0.048192771 |             |
| 0.046511628 | 0.282988871 | 0.020134228 | 0.006666667 | 0.014198783 | 0.024096386 |             |
| 0.127906977 | 0.108108108 | 0.026845638 | 0.053333333 | 0.004056795 | 0.012048193 |             |
| 0.023255814 | 0.028616852 | 0           |             | 0.02        | 0.004056795 | 0.108433735 |
| 0.034883721 | 0.122416534 | 0.006711409 |             | 0           | 0.012170385 | 0.048192771 |
| 0           | 0.069952305 | 0           | 0.013333333 |             | 0           | 0.048192771 |
| 0.011627907 | 0.092209857 | 0           | 0.013333333 | 0.002028398 | 0.060240964 |             |
| 0.023255814 | 0.189189189 | 0           |             | 0.04        | 0.010141988 | 0.072289157 |
| 0.011627907 | 0.039745628 | 0.006711409 |             | 0           | 0.004056795 | 0.024096386 |
| 0.069767442 | 0.124006359 | 0           | 0.046666667 | 0.022312373 | 0.060240964 |             |
| 0.023255814 | 0.063593005 | 0           |             | 0           | 0.002028398 | 0.024096386 |
| 0.011627907 | 0.155802862 | 0.033557047 | 0.006666667 | 0.002028398 | 0.036144578 |             |
| 0.023255814 | 0.262321145 | 0.006711409 | 0.026666667 | 0.006085193 | 0.024096386 |             |

| SARC        | SKCM        | STAD        | TGCT        | THCA        | THYM        |
|-------------|-------------|-------------|-------------|-------------|-------------|
| 0.066666667 | 0.031779661 | 0.063348416 | 0.012820513 | 0.003913894 | 0           |
| 0.308333333 | 0.023305085 | 0.020361991 | 0.012820513 | 0           | 0           |
| 0.15        | 0.091101695 | 0.036199095 | 0.038461538 | 0           | 0.033333333 |
| 0.175       | 0.027542373 | 0.015837104 | 0.08974359  | 0.001956947 | 0           |
| 0.2         | 0.252118644 | 0.085972851 | 0.044871795 | 0.001956947 | 0           |
| 0.066666667 | 0.016949153 | 0.009049774 | 0.025641026 | 0           | 0           |
| 0.125       | 0.033898305 | 0.013574661 | 0           | 0.019569472 | 0           |
| 0.133333333 | 0.091101695 | 0.113122172 | 0.326923077 | 0           | 0           |
| 0.175       | 0.144067797 | 0.015837104 | 0.044871795 | 0           | 0           |
| 0.225       | 0.023305085 | 0.011312217 | 0.019230769 | 0           | 0           |
| 0.308333333 | 0.021186441 | 0.018099548 | 0.012820513 | 0           | 0           |
| 0.1         | 0.036016949 | 0.00678733  | 0           | 0.001956947 | 0           |
| 0.075       | 0.31779661  | 0.061085973 | 0.032051282 | 0.001956947 | 0           |
| 0.15        | 0.086864407 | 0.070135747 | 0.897435897 | 0.007827789 | 0.033333333 |
| 0.025       | 0.021186441 | 0.009049774 | 0.032051282 | 0.005870841 | 0           |
| 0.066666667 | 0.027542373 | 0.031674208 | 0.044871795 | 0.001956947 | 0           |
| 0.216666667 | 0.040254237 | 0.031674208 | 0.057692308 | 0.007827789 | 0           |
| 0.108333333 | 0.029661017 | 0.00678733  | 0           | 0.001956947 | 0           |
| 0.033333333 | 0.008474576 | 0.027149321 | 0.012820513 | 0.001956947 | 0           |
| 0.15        | 0.014830508 | 0.054298643 | 0.012820513 | 0           | 0           |
| 0.091666667 | 0.040254237 | 0.042986425 | 0.006410256 | 0           | 0           |
| 0.2         | 0.086864407 | 0.038461538 | 0.038461538 | 0           | 0.033333333 |
| 0.025       | 0.031779661 | 0.022624434 | 0.019230769 | 0.005870841 | 0           |
| 0.158333333 | 0.050847458 | 0.00678733  | 0.532051282 | 0           | 0.033333333 |
| 0.116666667 | 0.016949153 | 0.049773756 | 0.012820513 | 0           | 0           |
| 0.208333333 | 0.069915254 | 0.020361991 | 0.006410256 | 0.001956947 | 0           |
| 0.025       | 0.014830508 | 0.033936652 | 0.16025641  | 0.009784736 | 0           |
| 0.183333333 | 0.131355932 | 0.013574661 | 0.044871795 | 0           | 0           |
| 0.066666667 | 0.014830508 | 0.020361991 | 0.102564103 | 0.009784736 | 0           |
| 0.183333333 | 0.129237288 | 0.022624434 | 0.102564103 | 0.003913894 | 0.033333333 |
| 0.041666667 | 0.012711864 | 0.011312217 | 0.006410256 | 0.001956947 | 0           |
| 0.05        | 0.033898305 | 0.027149321 | 0.134615385 | 0           | 0.033333333 |



| UCEC        | UCS         | UVM    |
|-------------|-------------|--------|
| 0.027322404 | 0.017857143 | 0.0625 |
| 0.029143898 | 0.178571429 | 0.0125 |
| 0.018214936 | 0.107142857 | 0.0125 |
| 0.041894353 | 0.071428571 | 0.0625 |
| 0.058287796 | 0.357142857 | 0.3375 |
| 0.043715847 | 0.017857143 | 0      |
| 0.023679417 | 0.053571429 | 0      |
| 0.114754098 | 0.196428571 | 0.2    |
| 0.036429872 | 0.178571429 | 0.0125 |
| 0.120218579 | 0.142857143 | 0.0125 |
| 0.032786885 | 0.196428571 | 0.025  |
| 0.014571949 | 0           | 0.05   |
| 0.071038251 | 0.357142857 | 0.55   |
| 0.054644809 | 0.214285714 | 0      |
| 0.021857923 | 0.035714286 | 0      |
| 0.080145719 | 0.196428571 | 0.05   |
| 0.132969035 | 0.089285714 | 0.0375 |
| 0.007285974 | 0           | 0.05   |
| 0.014571949 | 0.053571429 | 0      |
| 0.04007286  | 0.196428571 | 0.05   |
| 0.04007286  | 0.071428571 | 0.075  |
| 0.009107468 | 0.089285714 | 0.0125 |
| 0.016393443 | 0           | 0      |
| 0.030965392 | 0.160714286 | 0.1875 |
| 0.038251366 | 0.142857143 | 0.0625 |
| 0.023679417 | 0.178571429 | 0.1375 |
| 0.06557377  | 0.196428571 | 0      |
| 0.038251366 | 0.178571429 | 0.0125 |
| 0.032786885 | 0.071428571 | 0      |
| 0.025500911 | 0.142857143 | 0.0125 |
| 0.049180328 | 0.160714286 | 0.025  |
| 0.109289617 | 0.392857143 | 0.125  |

**Table S2: CNV deletion frequency of oxidative stress pathway genes across 32 cancer types**

|        | ACC         | BLCA        | BRCA        | CESC        | CHOL        |
|--------|-------------|-------------|-------------|-------------|-------------|
| CAT    | 0.177777778 | 0.142512077 | 0.049671978 | 0.118367347 | 0.060606061 |
| CYBB   | 0           | 0.028985507 | 0.018744142 | 0.024489796 | 0           |
| CYP1A1 | 0.1         | 0.041062802 | 0.05529522  | 0.036734694 | 0           |
| FOS    | 0.066666667 | 0.077294686 | 0.112464855 | 0.020408163 | 0.363636364 |
| GCLC   | 0.077777778 | 0.031400966 | 0.035613871 | 0.089795918 | 0.090909091 |
| GPX1   | 0.1         | 0.089371981 | 0.128397376 | 0.310204082 | 0.515151515 |
| GPX3   | 0.022222222 | 0.125603865 | 0.063730084 | 0.089795918 | 0           |
| GSR    | 0.122222222 | 0.292270531 | 0.287722587 | 0.191836735 | 0.121212121 |
| HMOX1  | 0.311111111 | 0.060386473 | 0.187441425 | 0.053061224 | 0.03030303  |
| JUNB   | 0.011111111 | 0.048309179 | 0.029053421 | 0.065306122 | 0           |
| MAOA   | 0           | 0.038647343 | 0.017806935 | 0.032653061 | 0           |
| MAPK10 | 0.033333333 | 0.06763285  | 0.070290534 | 0.142857143 | 0.151515152 |
| MAPK14 | 0.077777778 | 0.036231884 | 0.033739456 | 0.06122449  | 0.060606061 |
| MGST1  | 0.033333333 | 0.038647343 | 0.070290534 | 0.085714286 | 0.03030303  |
| MT1X   | 0.055555556 | 0.089371981 | 0.305529522 | 0.089795918 | 0.060606061 |
| NFE2L2 | 0.055555556 | 0.074879227 | 0.029990628 | 0.044897959 | 0           |
| NFIX   | 0.011111111 | 0.04589372  | 0.026241799 | 0.065306122 | 0           |
| NFKB1  | 0.033333333 | 0.041062802 | 0.063730084 | 0.102040816 | 0.181818182 |
| NOX1   | 0.022222222 | 0.014492754 | 0.010309278 | 0           | 0           |
| NOX3   | 0.1         | 0.111111111 | 0.138706654 | 0.167346939 | 0.454545455 |
| NOX4   | 0.177777778 | 0.074879227 | 0.209934396 | 0.224489796 | 0.060606061 |
| NOX5   | 0.1         | 0.04589372  | 0.057169634 | 0.040816327 | 0           |
| NQO1   | 0.044444444 | 0.072463768 | 0.319587629 | 0.057142857 | 0.090909091 |
| SOD1   | 0.1         | 0.028985507 | 0.040299906 | 0.053061224 | 0.181818182 |
| SOD2   | 0.1         | 0.115942029 | 0.149015933 | 0.175510204 | 0.454545455 |
| SOD3   | 0.044444444 | 0.06763285  | 0.11715089  | 0.281632653 | 0.060606061 |
| SP1    | 0           | 0.026570048 | 0.029053421 | 0.004081633 | 0           |
| TXN2   | 0.311111111 | 0.065217391 | 0.194001874 | 0.069387755 | 0.03030303  |
| TXNRD1 | 0.022222222 | 0.026570048 | 0.046860356 | 0.004081633 | 0.121212121 |
| TXNRD2 | 0.311111111 | 0.055555556 | 0.159325211 | 0.036734694 | 0.03030303  |
| UGT1A6 | 0.077777778 | 0.214975845 | 0.059981256 | 0.281632653 | 0           |
| XDH    | 0.077777778 | 0.012077295 | 0.018744142 | 0.004081633 | 0.03030303  |

| COAD        | DLBC        | ESCA        | GBM         | HNSC        | KICH        |             |
|-------------|-------------|-------------|-------------|-------------|-------------|-------------|
| 0.014028056 |             | 0           | 0.052083333 | 0.068471338 | 0.060344828 | 0.106060606 |
| 0.026052104 |             | 0           | 0.114583333 | 0.00955414  | 0.068965517 | 0           |
| 0.140280561 | 0.068965517 |             | 0.03125     | 0.076433121 | 0.051724138 | 0           |
| 0.190380762 |             | 0           | 0.052083333 | 0.203821656 | 0.051724138 | 0.015151515 |
| 0.022044088 |             | 0           | 0.03125     | 0.039808917 | 0.051724138 | 0.681818182 |
| 0.044088176 | 0.034482759 | 0.395833333 | 0.042993631 | 0.284482759 | 0.045454545 |             |
| 0.04008016  |             | 0           | 0.166666667 | 0.022292994 | 0.103448276 | 0.090909091 |
| 0.308617234 | 0.172413793 |             | 0.28125     | 0.042993631 | 0.103448276 | 0.166666667 |
| 0.114228457 |             | 0           | 0.03125     | 0.210191083 | 0.00862069  | 0.015151515 |
| 0.016032064 |             | 0           | 0.010416667 | 0.007961783 | 0.00862069  | 0           |
| 0.026052104 |             | 0           | 0.104166667 | 0.012738854 | 0.060344828 | 0           |
| 0.066132265 | 0.103448276 | 0.072916667 | 0.025477707 | 0.051724138 |             | 0           |
| 0.016032064 |             | 0           | 0.041666667 | 0.031847134 | 0.068965517 | 0.545454545 |
| 0.018036072 | 0.034482759 | 0.010416667 | 0.060509554 | 0.017241379 | 0.015151515 |             |
| 0.016032064 | 0.034482759 |             | 0.03125     | 0.065286624 | 0.077586207 | 0.045454545 |
| 0.01002004  |             | 0           | 0.020833333 | 0.003184713 | 0.00862069  | 0.333333333 |
| 0.016032064 |             | 0           | 0.010416667 | 0.01433121  | 0.00862069  | 0           |
| 0.062124248 | 0.068965517 | 0.114583333 | 0.027070064 | 0.094827586 |             | 0           |
| 0.004008016 |             | 0           | 0           | 0           | 0           | 0           |
| 0.034068136 | 0.137931034 | 0.072916667 | 0.164012739 | 0.034482759 | 0.666666667 |             |
| 0.026052104 |             | 0           | 0.166666667 | 0.025477707 | 0.094827586 | 0.121212121 |
| 0.134268537 | 0.068965517 |             | 0.03125     | 0.070063694 | 0.043103448 | 0           |
| 0.014028056 | 0.034482759 |             | 0.03125     | 0.068471338 | 0.077586207 | 0.045454545 |
| 0.098196393 |             | 0           | 0.166666667 | 0.031847134 | 0.086206897 | 0.318181818 |
| 0.036072144 | 0.137931034 | 0.104166667 | 0.167197452 | 0.043103448 | 0.666666667 |             |
| 0.078156313 |             | 0           | 0.239583333 | 0.02388535  | 0.163793103 | 0           |
| 0           |             | 0           | 0.03125     | 0.046178344 | 0           | 0           |
| 0.110220441 |             | 0           | 0.03125     | 0.207006369 | 0.00862069  | 0           |
| 0.018036072 | 0.034482759 | 0.020833333 | 0.01910828  | 0.00862069  |             | 0           |
| 0.112224449 |             | 0           | 0.03125     | 0.175159236 | 0.017241379 | 0.015151515 |
| 0.026052104 |             | 0           | 0.125       | 0.02866242  | 0.103448276 | 0.363636364 |
| 0.012024048 |             | 0           | 0           | 0.007961783 | 0           | 0.409090909 |

| KIRC        | KIRP        | LGG         | LIHC        | LUAD        | LUSC        |
|-------------|-------------|-------------|-------------|-------------|-------------|
| 0.005093379 | 0.026315789 | 0.088180113 | 0.015831135 | 0.027027027 | 0.026717557 |
| 0.003395586 | 0.006578947 | 0.018761726 | 0.073878628 | 0.036679537 | 0.036259542 |
| 0.008488964 | 0.029605263 | 0.026266417 | 0.055408971 | 0.036679537 | 0.020992366 |
| 0.132427844 | 0.101973684 | 0.135084428 | 0.155672823 | 0.038610039 | 0.047709924 |
| 0.042444822 | 0.072368421 | 0.015009381 | 0.01055409  | 0.023166023 | 0.019083969 |
| 0.42614601  | 0.046052632 | 0.041275797 | 0.052770449 | 0.063706564 | 0.183206107 |
| 0.001697793 | 0.009868421 | 0.030018762 | 0.015831135 | 0.042471042 | 0.146946565 |
| 0.108658744 | 0.0625      | 0.015009381 | 0.548812665 | 0.21042471  | 0.190839695 |
| 0.005093379 | 0.121710526 | 0.054409006 | 0.07651715  | 0.063706564 | 0.013358779 |
| 0.003395586 | 0.016447368 | 0.003752345 | 0.07651715  | 0.106177606 | 0.047709924 |
| 0.001697793 | 0.009868421 | 0.015009381 | 0.065963061 | 0.025096525 | 0.041984733 |
| 0.016977929 | 0.049342105 | 0.060037523 | 0.250659631 | 0.030888031 | 0.064885496 |
| 0.033955857 | 0.082236842 | 0.005628518 | 0.018469657 | 0.011583012 | 0.036259542 |
| 0.001697793 | 0.003289474 | 0.020637899 | 0.092348285 | 0.065637066 | 0.003816794 |
| 0.013582343 | 0.006578947 | 0.013133208 | 0.224274406 | 0.052123552 | 0.070610687 |
| 0.005093379 | 0.006578947 | 0.009380863 | 0.023746702 | 0           | 0.007633588 |
| 0.003395586 | 0.016447368 | 0.003752345 | 0.07651715  | 0.106177606 | 0.055343511 |
| 0.015280136 | 0.046052632 | 0.061913696 | 0.250659631 | 0.019305019 | 0.06870229  |
| 0.003395586 | 0.003289474 | 0.003752345 | 0.002638522 | 0.003861004 | 0.009541985 |
| 0.101867572 | 0.059210526 | 0.088180113 | 0.229551451 | 0.135135135 | 0.028625954 |
| 0.01188455  | 0.032894737 | 0.009380863 | 0.065963061 | 0.021235521 | 0.02480916  |
| 0.005093379 | 0.023026316 | 0.024390244 | 0.036939314 | 0.042471042 | 0.022900763 |
| 0.01188455  | 0.006578947 | 0.011257036 | 0.237467018 | 0.030888031 | 0.066793893 |
| 0.033955857 | 0.105263158 | 0.028142589 | 0.118733509 | 0.061776062 | 0.078244275 |
| 0.101867572 | 0.059210526 | 0.088180113 | 0.232189974 | 0.142857143 | 0.038167939 |
| 0.018675722 | 0.046052632 | 0.031894934 | 0.094986807 | 0.019305019 | 0.145038168 |
| 0           | 0           | 0.04315197  | 0.007915567 | 0.00965251  | 0.003816794 |
| 0.005093379 | 0.121710526 | 0.046904315 | 0.071240106 | 0.071428571 | 0.015267176 |
| 0.001697793 | 0           | 0.033771107 | 0.023746702 | 0.019305019 | 0.009541985 |
| 0.003395586 | 0.118421053 | 0.033771107 | 0.073878628 | 0.046332046 | 0.019083969 |
| 0.049235993 | 0.046052632 | 0.071294559 | 0.034300792 | 0.015444015 | 0.066793893 |
| 0.010186757 | 0.029605263 | 0.011257036 | 0.005277045 | 0.001930502 | 0.003816794 |

| MESO        | OV          | PAAD        | PCPG        | PRAD        | READ        |             |
|-------------|-------------|-------------|-------------|-------------|-------------|-------------|
| 0.011627907 | 0.13990461  | 0.013422819 |             | 0.24        | 0.014198783 | 0.036144578 |
| 0.011627907 | 0.141494436 | 0.013422819 |             | 0           | 0.004056795 | 0           |
| 0.011627907 | 0.246422893 | 0.026845638 | 0.006666667 | 0.022312373 | 0.168674699 |             |
| 0.186046512 | 0.211446741 | 0.020134228 | 0.073333333 | 0.016227181 | 0.192771084 |             |
| 0.034883721 | 0.101748808 | 0.020134228 |             | 0           | 0.016227181 | 0.024096386 |
| 0.290697674 | 0.128775835 | 0.033557047 |             | 0.18        | 0.014198783 | 0.096385542 |
| 0.034883721 | 0.186009539 | 0.013422819 | 0.033333333 | 0.010141988 | 0.144578313 |             |
| 0.093023256 | 0.446740859 | 0.073825503 | 0.126666667 | 0.269776876 | 0.385542169 |             |
| 0.476744186 | 0.46263911  | 0.040268456 |             | 0.3         | 0.012170385 | 0.144578313 |
| 0           | 0.100158983 | 0.013422819 |             | 0           | 0.010141988 | 0.012048193 |
| 0.011627907 | 0.101748808 | 0.026845638 |             | 0           | 0.006085193 | 0.024096386 |
| 0.127906977 | 0.422893482 | 0.013422819 |             | 0.04        | 0.022312373 | 0.108433735 |
| 0.011627907 | 0.093799682 | 0.020134228 |             | 0           | 0.004056795 | 0.072289157 |
| 0.046511628 | 0.092209857 | 0.040268456 |             | 0.08        | 0.0831643   | 0.096385542 |
| 0.011627907 | 0.432432432 | 0.006711409 |             | 0           | 0.107505071 | 0.012048193 |
| 0           | 0.028616852 | 0.013422819 | 0.013333333 | 0.036511156 | 0.024096386 |             |
| 0.011627907 | 0.074721781 | 0.006711409 |             | 0           | 0.012170385 | 0.012048193 |
| 0.11627907  | 0.473767886 | 0.013422819 |             | 0           | 0.00811359  | 0.156626506 |
| 0           | 0.027027027 | 0           |             | 0           | 0           | 0.024096386 |
| 0.197674419 | 0.434022258 | 0.120805369 |             | 0.14        | 0.024340771 | 0.048192771 |
| 0.034883721 | 0.089030207 | 0           | 0.173333333 | 0.006085193 | 0.036144578 |             |
| 0.011627907 | 0.217806041 | 0.026845638 | 0.013333333 | 0.014198783 | 0.180722892 |             |
| 0.046511628 | 0.513513514 | 0.006711409 | 0.006666667 | 0.154158215 | 0.012048193 |             |
| 0.034883721 | 0.158982512 | 0.053691275 | 0.133333333 | 0.020283976 | 0.180722892 |             |
| 0.174418605 | 0.448330684 | 0.120805369 | 0.133333333 | 0.032454361 | 0.048192771 |             |
| 0.139534884 | 0.246422893 | 0.006711409 |             | 0.02        | 0.026369168 | 0.072289157 |
| 0.023255814 | 0.06518283  | 0.013422819 | 0.013333333 | 0.004056795 | 0.012048193 |             |
| 0.476744186 | 0.483306836 | 0.040268456 |             | 0.3         | 0.010141988 | 0.144578313 |
| 0.011627907 | 0.193958665 | 0.013422819 | 0.033333333 | 0.014198783 | 0.048192771 |             |
| 0.38372093  | 0.33227345  | 0.053691275 | 0.213333333 | 0.014198783 | 0.144578313 |             |
| 0.034883721 | 0.120826709 | 0.006711409 |             | 0.02        | 0.016227181 | 0           |
| 0.069767442 | 0.027027027 | 0.006711409 | 0.033333333 | 0.018255578 | 0.048192771 |             |

| SARC        | SKCM        | STAD        | TGCT        | THCA        | THYM        |
|-------------|-------------|-------------|-------------|-------------|-------------|
| 0.108333333 | 0.112288136 | 0.013574661 | 0.057692308 | 0.005870841 | 0.033333333 |
| 0           | 0.014830508 | 0.011312217 | 0.012820513 | 0.001956947 | 0           |
| 0.05        | 0.023305085 | 0.029411765 | 0.006410256 | 0.011741683 | 0           |
| 0.058333333 | 0.131355932 | 0.022624434 | 0           | 0.005870841 | 0.033333333 |
| 0.041666667 | 0.046610169 | 0.009049774 | 0.012820513 | 0.001956947 | 0.033333333 |
| 0.125       | 0.065677966 | 0.042986425 | 0           | 0           | 0.033333333 |
| 0.041666667 | 0.152542373 | 0.056561086 | 0.032051282 | 0           | 0           |
| 0.133333333 | 0.137711864 | 0.083710407 | 0.006410256 | 0           | 0           |
| 0.05        | 0.063559322 | 0.056561086 | 0.019230769 | 0.140900196 | 0.033333333 |
| 0.025       | 0.033898305 | 0.042986425 | 0.012820513 | 0.011741683 | 0           |
| 0           | 0.014830508 | 0.011312217 | 0.012820513 | 0.001956947 | 0           |
| 0.083333333 | 0.065677966 | 0.056561086 | 0.038461538 | 0.001956947 | 0           |
| 0.033333333 | 0.025423729 | 0.024886878 | 0.006410256 | 0           | 0.033333333 |
| 0.133333333 | 0.040254237 | 0.042986425 | 0           | 0           | 0           |
| 0.191666667 | 0.133474576 | 0.049773756 | 0.019230769 | 0.005870841 | 0.066666667 |
| 0.05        | 0.029661017 | 0.013574661 | 0           | 0.001956947 | 0           |
| 0.008333333 | 0.040254237 | 0.033936652 | 0.012820513 | 0.01369863  | 0           |
| 0.091666667 | 0.072033898 | 0.033936652 | 0.044871795 | 0           | 0           |
| 0.116666667 | 0.008474576 | 0.00678733  | 0           | 0.001956947 | 0           |
| 0.05        | 0.338983051 | 0.038461538 | 0.012820513 | 0.009784736 | 0.066666667 |
| 0.125       | 0.184322034 | 0.011312217 | 0.173076923 | 0.01369863  | 0           |
| 0.041666667 | 0.023305085 | 0.027149321 | 0.019230769 | 0.011741683 | 0           |
| 0.2         | 0.116525424 | 0.040723982 | 0           | 0.005870841 | 0.066666667 |
| 0.058333333 | 0.063559322 | 0.074660633 | 0           | 0.001956947 | 0.033333333 |
| 0.091666667 | 0.334745763 | 0.036199095 | 0.012820513 | 0.005870841 | 0.066666667 |
| 0.05        | 0.061440678 | 0.040723982 | 0.012820513 | 0           | 0           |
| 0.075       | 0.078389831 | 0.024886878 | 0           | 0           | 0           |
| 0.05        | 0.06779661  | 0.056561086 | 0.019230769 | 0.140900196 | 0.066666667 |
| 0.016666667 | 0.091101695 | 0.024886878 | 0           | 0           | 0           |
| 0.05        | 0.046610169 | 0.036199095 | 0.006410256 | 0.119373777 | 0           |
| 0.25        | 0.082627119 | 0.024886878 | 0.006410256 | 0.007827789 | 0           |
| 0.1         | 0.046610169 | 0.015837104 | 0           | 0.007827789 | 0           |

| UCEC        | UCS         | UVM    |
|-------------|-------------|--------|
| 0.063752277 | 0.25        | 0.0125 |
| 0.04007286  | 0.107142857 | 0      |
| 0.080145719 | 0.232142857 | 0.05   |
| 0.038251366 | 0.178571429 | 0.025  |
| 0.016393443 | 0.017857143 | 0      |
| 0.052823315 | 0.339285714 | 0.5125 |
| 0.051001821 | 0.071428571 | 0.0625 |
| 0.14571949  | 0.339285714 | 0.225  |
| 0.102003643 | 0.357142857 | 0      |
| 0.04007286  | 0.285714286 | 0.0125 |
| 0.025500911 | 0.107142857 | 0      |
| 0.056466302 | 0.357142857 | 0.0625 |
| 0.007285974 | 0.035714286 | 0      |
| 0.032786885 | 0.142857143 | 0.0125 |
| 0.176684882 | 0.410714286 | 0.25   |
| 0.005464481 | 0           | 0      |
| 0.029143898 | 0.303571429 | 0.0125 |
| 0.069216758 | 0.375       | 0.0625 |
| 0.001821494 | 0.035714286 | 0.0125 |
| 0.025500911 | 0.089285714 | 0.3625 |
| 0.061930783 | 0.285714286 | 0.0125 |
| 0.092896175 | 0.232142857 | 0.05   |
| 0.193078324 | 0.375       | 0.2625 |
| 0.02003643  | 0.142857143 | 0.0125 |
| 0.030965392 | 0.089285714 | 0.3375 |
| 0.078324226 | 0.053571429 | 0      |
| 0.007285974 | 0.053571429 | 0.05   |
| 0.103825137 | 0.357142857 | 0      |
| 0.023679417 | 0.178571429 | 0.025  |
| 0.061930783 | 0.25        | 0      |
| 0.021857923 | 0.017857143 | 0.05   |
| 0.003642987 | 0           | 0      |

**Table S3: LogFCs of oxidative stress pathway genes across cancer types**

|        | BLCA         | CHOL         | COAD         | ESCA         | KICH         |
|--------|--------------|--------------|--------------|--------------|--------------|
| NFKB1  | -0.439076225 | 1.329462396  | -0.130029002 | NA           | -0.306714868 |
| TXN2   | NA           | 0.410249505  | -0.148117699 | NA           | NA           |
| SOD2   | -0.716605932 | NA           | NA           | 0.668002925  | -0.705701405 |
| NOX4   | 0.853513976  | 4.605482675  | 3.263303752  | 2.817397978  | NA           |
| SOD3   | -1.66235745  | 2.459778774  | NA           | NA           | -3.613988059 |
| UGT1A6 | NA           | 0.131464889  | 1.710398948  | NA           | -1.498557151 |
| XDH    | 0.992387356  | -2.101025185 | -2.187278835 | 1.448922633  | -0.660752536 |
| MAOA   | -0.320697309 | -0.317039197 | -1.865149825 | -0.974378367 | -1.150010817 |
| SP1    | NA           | 2.206209099  | NA           | 0.443510943  | -0.478850403 |
| GSTT2  | NA           | NA           | NA           | NA           | -2.700696949 |
| NFIX   | -1.903075542 | 1.810023147  | NA           | -0.65407519  | NA           |
| GPX1   | 0.775961434  | NA           | 0.804836749  | 0.603481312  | 0.515302155  |
| JUNB   | -1.568824269 | NA           | NA           | NA           | -1.97243578  |
| MT1X   | NA           | -3.89169703  | -2.356448686 | -0.842418616 | -3.099756385 |
| MAPK10 | -0.542129104 | 2.790690524  | -1.801331162 | NA           | -2.311669045 |
| NOX1   | 0.793480721  | 2.410529043  | 0.989596271  | 3.867621588  | -0.361940536 |
| CAT    | -0.547521273 | -2.67514698  | -0.75164504  | -0.574691117 | -0.274220454 |
| NOX5   | 0.995531155  | 5.411323583  | -0.321129384 | NA           | -0.276874703 |
| NQO1   | 0.658532332  | 6.237128844  | 1.052144103  | NA           | -1.450788816 |
| CYBB   | NA           | 1.513610402  | -0.579851189 | 0.850803195  | NA           |
| FOS    | -2.937240001 | -0.971530023 | -0.719953527 | NA           | -3.093925318 |
| MAPK14 | NA           | 0.784720038  | NA           | 0.301408918  | -1.085250937 |
| TXNRD1 | -0.866484362 | 1.804494111  | NA           | NA           | -0.203232    |
| GCLC   | NA           | -1.511763315 | 0.356831363  | NA           | 0.66287402   |
| TXNRD2 | NA           | -0.434155129 | 0.326994165  | NA           | 0.531490921  |
| SOD1   | 0.314028363  | -1.566449041 | NA           | 0.552337549  | -0.925362982 |
| MGST1  | 0.583473919  | -2.076407085 | -0.470610763 | NA           | -3.197380429 |
| NFE2L2 | -0.710630109 | 0.542191221  | -0.192206867 | -0.24189644  | -0.414667511 |
| CYP1A1 | 2.893471597  | -4.669465444 | 1.620690566  | -1.543078178 | NA           |
| GPX3   | -0.81076426  | -1.06529925  | -2.3223113   | -1.296400651 | -2.284920971 |
| GSR    | NA           | 1.997840241  | -0.261042732 | NA           | NA           |
| HMOX1  | 1.224009642  | NA           | -1.6121345   | NA           | NA           |
| NOX3   | NA           | NA           | 0.727071377  | NA           | -3.646518219 |



| KIRC         | KIRP         | LIHC         | LUAD         | LUSC         |
|--------------|--------------|--------------|--------------|--------------|
| 0.24164608   | NA           | NA           | NA           | -0.453567795 |
| -0.406160513 | -0.289301317 | 0.256332069  | NA           | 0.576993718  |
| 1.188816991  | 1.089821731  | NA           | -0.214679891 | -0.67744235  |
| -1.248573196 | -1.49807705  | 3.48709578   | 1.466367641  | 1.440239826  |
| -1.554854137 | -0.446983446 | NA           | -0.95238701  | -2.231188392 |
| NA           | NA           | 1.292981041  | NA           | 5.765389784  |
| 1.57384433   | 3.183194956  | -0.715127622 | 4.258858745  | 3.689520568  |
| -0.774355542 | -0.520528385 | NA           | -0.677017714 | -1.132004821 |
| 0.25255757   | 0.639147616  | 0.72266349   | NA           | 0.220263438  |
| NA           | -1.295413759 | 1.415878012  | NA           | NA           |
| 0.791372509  | -0.220984928 | 0.834115225  | -1.305225757 | -1.241695982 |
| 0.786001703  | 1.685195385  | 0.840856729  | NA           | -0.320157599 |
| NA           | -1.055455372 | -0.885905773 | -1.01761567  | -0.98808724  |
| -0.939859158 | -1.92840954  | -2.043501427 | -0.705279145 | 0.472979029  |
| -1.046656228 | -0.721211511 | 0.682551663  | -0.859758374 | 0.010759772  |
| -0.040881999 | 0.646698896  | 1.505124846  | 1.538775552  | 0.854856431  |
| -1.274063043 | -1.475989999 | -0.807725504 | -1.769115259 | -1.972019478 |
| 0.756442146  | -0.385581267 | 2.065800921  | 3.353592348  | 1.877260641  |
| -0.424650319 | NA           | 5.311194426  | 3.109239193  | 2.864582221  |
| 1.847374247  | 1.139740871  | -0.196676902 | -1.142075491 | -1.926140364 |
| -0.669584286 | -1.541522051 | -2.419249865 | -1.495271499 | -2.306173777 |
| -0.146114969 | NA           | 0.55436025   | 0.232890743  | NA           |
| 0.02024632   | 1.551702575  | 2.055144716  | 1.716596196  | 1.542206242  |
| NA           | 0.653778999  | NA           | 2.388910968  | 3.518187265  |
| -0.552492445 | -0.413656735 | NA           | NA           | -0.201533103 |
| -0.451491491 | -0.196548791 | -0.06641154  | 0.611578087  | 0.748441236  |
| 0.578077104  | 0.939754416  | -0.279093959 | 1.11877363   | NA           |
| -0.484936515 | -0.12983954  | -0.242815962 | -0.373418731 | 0.998364232  |
| -3.077547011 | -3.931159158 | 0.944241425  | -1.605427172 | 0.440083849  |
| -1.560492481 | -3.310815649 | NA           | -2.178480585 | -3.312563773 |
| -0.595887164 | 0.013503365  | 0.766254577  | 1.100731372  | 1.500504426  |
| 2.368126439  | 1.665403533  | -0.725030232 | -1.540536423 | -1.135785012 |
| 0.985761138  | -1.339663883 | NA           | -0.661500652 | -0.112726279 |

| PAAD         | PCPG         | PRAD         | READ         | SARC         | SKCM |
|--------------|--------------|--------------|--------------|--------------|------|
| NA           | -0.953182582 | -0.15175299  | NA           | NA           | NA   |
| NA           | -1.465808136 | 0.156747759  | NA           | NA           | NA   |
| -1.604856297 | -1.095318861 | NA           | NA           | NA           | NA   |
| NA           | 3.437971067  | 1.986625421  | NA           | -4.478358278 | NA   |
| NA           | NA           | -0.116434162 | NA           | NA           | NA   |
| NA           | NA           | -1.501360096 | NA           | -12.53357508 | NA   |
| NA           | NA           | NA           | NA           | NA           | NA   |
| NA           | -1.546357692 | 0.625737683  | -1.773576706 | -3.823678923 | NA   |
| NA           | -0.51880438  | -0.147515129 | NA           | NA           | NA   |
| NA           | NA           | NA           | NA           | NA           | NA   |
| NA           | NA           | 0.268839386  | NA           | 3.272214622  | NA   |
| NA           | -1.202369904 | 0.25486236   | NA           | NA           | NA   |
| NA           | NA           | NA           | NA           | NA           | NA   |
| NA           | -1.750808849 | -0.384497846 | -2.715786621 | -2.941219384 | NA   |
| NA           | NA           | -0.214905248 | -2.554996071 | NA           | NA   |
| NA           | NA           | -1.349872267 | NA           | NA           | NA   |
| NA           | -3.118101831 | -0.538722872 | -0.787089763 | -2.248726044 | NA   |
| NA           | NA           | -0.169878904 | NA           | NA           | NA   |
| NA           | -1.532247417 | NA           | NA           | -2.320497119 | NA   |
| NA           | NA           | NA           | NA           | NA           | NA   |
| NA           | NA           | -0.55125022  | NA           | NA           | NA   |
| NA           | NA           | -0.35667376  | NA           | NA           | NA   |
| NA           | -1.189004741 | -0.219151072 | NA           | NA           | NA   |
| NA           | NA           | -0.301769818 | NA           | NA           | NA   |
| NA           | -1.832598302 | 0.712070896  | NA           | NA           | NA   |
| NA           | -0.922354154 | 0.236613386  | NA           | NA           | NA   |
| NA           | -4.639694965 | NA           | NA           | -2.023831365 | NA   |
| NA           | NA           | -0.589800114 | NA           | NA           | NA   |
| NA           | NA           | NA           | NA           | NA           | NA   |
| NA           | NA           | -1.08113055  | -2.538000845 | -6.186181838 | NA   |
| NA           | NA           | -0.231245734 | NA           | -1.606165349 | NA   |
| -1.484289735 | NA           | NA           | NA           | NA           | NA   |
| NA           | 3.541495755  | NA           | -1.991942632 | NA           | NA   |

| STAD         | THCA         | THYM         | UCEC         |
|--------------|--------------|--------------|--------------|
| 0.457611872  | -0.180483607 | NA           | -0.77495831  |
| -0.360722294 | -0.247654534 | 0.604215647  | 0.305924106  |
| 0.95742894   | -0.056513265 | NA           | NA           |
| 2.11586986   | 2.441944531  | NA           | NA           |
| -0.867017165 | -1.508258699 | NA           | -0.958881609 |
| 0.36053314   | -0.444041865 | NA           | 6.386840579  |
| NA           | NA           | NA           | 3.989951705  |
| -1.277094855 | NA           | NA           | -1.431011042 |
| 0.559678602  | NA           | NA           | -0.420211986 |
| NA           | -0.238788552 | NA           | NA           |
| -0.595283266 | -0.168840506 | NA           | -1.116725799 |
| NA           | 0.980552896  | NA           | 1.381529882  |
| -1.119948165 | -0.613828374 | NA           | -1.848197165 |
| -1.551657923 | -0.873335199 | NA           | NA           |
| -1.490683086 | -0.390604398 | NA           | -2.481330046 |
| 4.713549551  | 0.863214636  | NA           | NA           |
| -0.456557157 | NA           | NA           | -0.348583703 |
| 0.0573108    | 2.459236634  | NA           | NA           |
| NA           | NA           | NA           | 3.137949585  |
| 0.992911752  | 0.08335611   | NA           | NA           |
| -1.249716    | -1.567124868 | -2.297600606 | -2.921633431 |
| NA           | 0.125366154  | NA           | -0.861695208 |
| 0.617191495  | -0.504962638 | NA           | NA           |
| 0.302612028  | -0.377205522 | NA           | NA           |
| NA           | -0.188477061 | NA           | 1.022815874  |
| NA           | NA           | 0.626551197  | 0.472332098  |
| NA           | 0.640462856  | -5.072992338 | 1.18193823   |
| -0.609514345 | -0.428274194 | NA           | -0.614053405 |
| -2.865086792 | -1.194329738 | -3.622801725 | NA           |
| -2.085671559 | -0.759390471 | NA           | -0.803496544 |
| NA           | 0.231239215  | NA           | 1.475649276  |
| NA           | 0.942327527  | NA           | 0.558038135  |
| NA           | NA           | NA           | NA           |

**Table S4: Hazard ratio of 33 oxidative stress genes**

|        | ACC         | BLCA        | CHOL        | COAD        | DLBC        |
|--------|-------------|-------------|-------------|-------------|-------------|
| SOD3   | NA          | NA          | NA          | NA          | NA          |
| NFIX   | NA          | NA          | NA          | NA          | NA          |
| NFE2L2 | NA          | NA          | NA          | NA          | NA          |
| MAPK10 | NA          | 0.865725223 | NA          | NA          | NA          |
| UGT1A6 | NA          | NA          | NA          | NA          | 8.25383E+11 |
| NOX3   | NA          | NA          | 1.38E+68    | NA          | NA          |
| NOX4   | 2.512576486 | NA          | 3.727016972 | 1.658531431 | NA          |
| MGST1  | NA          | NA          | NA          | NA          | NA          |
| NQO1   | 1.01347611  | NA          | NA          | NA          | NA          |
| SOD2   | 0.954997386 | NA          | NA          | NA          | NA          |
| GSR    | NA          | 1.005455563 | NA          | 0.973694939 | NA          |
| JUNB   | 1.005923625 | NA          | NA          | NA          | NA          |
| FOS    | 1.008078163 | NA          | NA          | NA          | NA          |
| MT1X   | NA          | NA          | NA          | NA          | NA          |
| HMOX1  | NA          | NA          | NA          | NA          | NA          |
| NOX5   | NA          | NA          | NA          | 3101456.087 | NA          |
| CAT    | NA          | NA          | NA          | NA          | NA          |
| GPX3   | NA          | 1.001229733 | NA          | 1.015396956 | NA          |
| CYBB   | NA          | NA          | NA          | NA          | NA          |
| GSTT2  | NA          | NA          | NA          | NA          | NA          |
| NFKB1  | NA          | NA          | NA          | NA          | NA          |
| GCLC   | NA          | NA          | NA          | NA          | NA          |
| XDH    | 1.543331478 | NA          | NA          | 0.912182864 | NA          |
| TXNRD1 | NA          | 1.00681654  | NA          | NA          | NA          |
| SOD1   | NA          | NA          | NA          | NA          | NA          |
| SP1    | 1.092044897 | NA          | NA          | NA          | NA          |
| TXN2   | NA          | NA          | NA          | 0.977351429 | NA          |
| MAPK14 | 1.089823429 | NA          | NA          | NA          | NA          |
| GPX1   | NA          | NA          | NA          | NA          | NA          |
| CYP1A1 | 59.4406026  | NA          | NA          | NA          | NA          |
| NOX1   | 0.116706078 | NA          | NA          | 0.995184244 | 3.624643563 |
| MAOA   | NA          | 0.990560553 | NA          | NA          | NA          |
| TXNRD2 | NA          | NA          | NA          | NA          | NA          |

| ESCA        | KICH        | KIRC        | KIRP        | LAML        | LIHC        |
|-------------|-------------|-------------|-------------|-------------|-------------|
| NA          | NA          | NA          | NA          | NA          | NA          |
| 0.973836743 | NA          | NA          | 1.080003205 | NA          | NA          |
| NA          | NA          | 0.971996264 | NA          | NA          | NA          |
| NA          | NA          | 0.717608306 | 0.602993462 | NA          | NA          |
| NA          | NA          | NA          | NA          | NA          | 1.033937102 |
| NA          | NA          | NA          | 64116973200 | NA          | NA          |
| NA          | NA          | NA          | 0.886990172 | NA          | NA          |
| NA          | NA          | 1.0115201   | NA          | 0.975245488 | NA          |
| NA          | NA          | 1.01606743  | 1.002258972 | NA          | 1.002031516 |
| NA          | NA          | 1.002887455 | NA          | NA          | NA          |
| NA          | NA          | NA          | NA          | NA          | 1.020421406 |
| NA          | NA          | NA          | NA          | 1.002215162 | NA          |
| NA          | NA          | NA          | NA          | NA          | NA          |
| NA          | NA          | 1.003163628 | NA          | NA          | NA          |
| NA          | NA          | 0.997403844 | NA          | 1.008152656 | 1.002645374 |
| NA          | NA          | NA          | NA          | NA          | 561.6574966 |
| NA          | NA          | 0.981559106 | NA          | NA          | 0.996000413 |
| NA          | NA          | NA          | NA          | NA          | NA          |
| NA          | NA          | NA          | NA          | NA          | 1.022473751 |
| NA          | NA          | NA          | NA          | NA          | NA          |
| NA          | NA          | 0.918321975 | NA          | NA          | NA          |
| NA          | NA          | 0.863130022 | 1.058420599 | NA          | NA          |
| NA          | 1228.264444 | NA          | NA          | NA          | NA          |
| NA          | NA          | 1.022932228 | 1.003704601 | NA          | 1.014935366 |
| NA          | NA          | NA          | NA          | 1.024650838 | NA          |
| NA          | NA          | NA          | NA          | NA          | NA          |
| 0.961848345 | NA          | NA          | 0.971892992 | 1.060790633 | NA          |
| NA          | 1.470030524 | NA          | NA          | NA          | NA          |
| NA          | NA          | NA          | NA          | 1.003634879 | NA          |
| NA          | 1.048433505 | NA          | NA          | NA          | NA          |
| NA          | NA          | 3.83524286  | NA          | NA          | NA          |
| NA          | NA          | NA          | NA          | NA          | NA          |
| NA          | NA          | NA          | 0.561434307 | NA          | NA          |

| LUAD        | LUSC        | MESO        | OV | PAAD        | PCPG | PRAD |
|-------------|-------------|-------------|----|-------------|------|------|
| 0.986696149 | NA          | NA          | NA | NA          | NA   | NA   |
| NA          | NA          | NA          | NA | 0.954080163 | NA   | NA   |
| NA          | NA          | 0.959975496 | NA | NA          | NA   | NA   |
| NA          | NA          | NA          | NA | NA          | NA   | NA   |
| NA          | NA          | 46.51736934 | NA | NA          | NA   | NA   |
| NA          | NA          | NA          | NA | NA          | NA   | NA   |
| NA          | NA          | NA          | NA | NA          | NA   | NA   |
| NA          | NA          | NA          | NA | NA          | NA   | NA   |
| NA          | NA          | NA          | NA | NA          | NA   | NA   |
| 1.007863675 | NA          | NA          | NA | NA          | NA   | NA   |
| NA          | NA          | NA          | NA | NA          | NA   | NA   |
| NA          | 1.001774085 | NA          | NA | NA          | NA   | NA   |
| NA          | 1.001585816 | NA          | NA | NA          | NA   | NA   |
| 1.00871575  | NA          | NA          | NA | NA          | NA   | NA   |
| NA          | NA          | NA          | NA | NA          | NA   | NA   |
| NA          | NA          | NA          | NA | 50.65908738 | NA   | NA   |
| 0.985591302 | NA          | NA          | NA | NA          | NA   | NA   |
| NA          | NA          | NA          | NA | NA          | NA   | NA   |
| NA          | NA          | NA          | NA | NA          | NA   | NA   |
| NA          | NA          | NA          | NA | NA          | NA   | NA   |
| NA          | NA          | NA          | NA | NA          | NA   | NA   |
| 1.005245027 | NA          | NA          | NA | NA          | NA   | NA   |
| NA          | NA          | NA          | NA | 1.027686513 | NA   | NA   |
| 1.001878065 | NA          | NA          | NA | NA          | NA   | NA   |
| 1.00333498  | NA          | NA          | NA | NA          | NA   | NA   |
| 1.039122943 | NA          | NA          | NA | NA          | NA   | NA   |
| NA          | NA          | NA          | NA | NA          | NA   | NA   |
| NA          | NA          | NA          | NA | NA          | NA   | NA   |
| NA          | NA          | NA          | NA | NA          | NA   | NA   |
| NA          | NA          | NA          | NA | NA          | NA   | NA   |
| NA          | 0.553454391 | NA          | NA | NA          | NA   | NA   |
| NA          | NA          | NA          | NA | NA          | NA   | NA   |
| NA          | NA          | NA          | NA | NA          | NA   | NA   |

| READ        | SARC        | SKCM        | STAD        | TGCT        | THCA        |
|-------------|-------------|-------------|-------------|-------------|-------------|
| NA          | NA          | NA          | NA          | NA          | NA          |
| NA          | NA          | NA          | NA          | NA          | NA          |
| NA          | NA          | 0.983456093 | NA          | NA          | NA          |
| NA          | NA          | 1.369520523 | 1.356161302 | NA          | NA          |
| NA          | NA          | 625.7462605 | NA          | NA          | 5871.13486  |
| NA          | NA          | NA          | 1.502812871 | NA          | NA          |
| NA          | NA          | 0.915061461 | 1.730025697 | NA          | NA          |
| NA          | NA          | NA          | NA          | NA          | 0.955192278 |
| NA          | NA          | NA          | NA          | NA          | NA          |
| 0.816720387 | NA          | 0.969525262 | NA          | NA          | NA          |
| NA          | NA          | NA          | NA          | NA          | NA          |
| NA          | NA          | NA          | NA          | NA          | NA          |
| NA          | NA          | NA          | NA          | NA          | NA          |
| NA          | NA          | NA          | NA          | NA          | NA          |
| NA          | NA          | NA          | NA          | NA          | NA          |
| NA          | NA          | NA          | 7.292740985 | NA          | NA          |
| NA          | NA          | NA          | NA          | NA          | NA          |
| NA          | NA          | NA          | NA          | NA          | NA          |
| NA          | NA          | 0.981249405 | NA          | 1.028345641 | NA          |
| NA          | 25.76201011 | NA          | NA          | NA          | NA          |
| 0.761634235 | 1.077655684 | NA          | NA          | NA          | NA          |
| NA          | NA          | NA          | NA          | NA          | NA          |
| NA          | 3.96591063  | NA          | NA          | NA          | NA          |
| NA          | NA          | NA          | NA          | NA          | NA          |
| NA          | NA          | NA          | NA          | NA          | NA          |
| NA          | NA          | NA          | NA          | NA          | NA          |
| NA          | NA          | NA          | NA          | NA          | NA          |
| NA          | NA          | NA          | NA          | NA          | NA          |
| NA          | 0.99400374  | NA          | NA          | NA          | 0.991143393 |
| NA          | 1.993088606 | NA          | NA          | NA          | NA          |
| NA          | NA          | NA          | NA          | NA          | NA          |
| NA          | NA          | NA          | NA          | NA          | NA          |
| NA          | NA          | 1.075552906 | NA          | NA          | NA          |

| THYM        | UCEC        | UVM         |
|-------------|-------------|-------------|
| NA          | NA          | NA          |
| NA          | NA          | NA          |
| NA          | NA          | NA          |
| 2.843137789 | NA          | NA          |
| NA          | NA          | NA          |
| NA          | 1.364524472 | NA          |
| NA          | NA          | NA          |
| 1.214890669 | 1.038535317 | 1.255909152 |
| 1.103832945 | 1.002086818 | 1.014386597 |
| 1.1076399   | NA          | 1.086611277 |
| NA          | 1.008933678 | 1.140517527 |
| NA          | NA          | NA          |
| NA          | NA          | NA          |
| NA          | NA          | NA          |
| NA          | 1.00246328  | 1.034538568 |
| NA          | NA          | NA          |
| NA          | 1.0216427   | NA          |
| NA          | NA          | 0.993332584 |
| 1.065476233 | NA          | NA          |
| NA          | NA          | NA          |
| NA          | NA          | NA          |
| 1.41991098  | 1.031449696 | NA          |
| NA          | 1.033964159 | NA          |
| NA          | 1.011682064 | 1.122743846 |
| 1.016226093 | NA          | 1.0182634   |
| NA          | NA          | NA          |
| NA          | NA          | NA          |
| 0.698263879 | NA          | NA          |
| NA          | NA          | NA          |
| NA          | NA          | NA          |
| NA          | NA          | 40.1337081  |
| NA          | NA          | NA          |
| NA          | NA          | 1.231062953 |



**Table S5: Interactions of oxidative stress genes**

| #node1 | node2  | node1_string | node2_string | neighborhood | gene_fusion | phylogenetic_ |
|--------|--------|--------------|--------------|--------------|-------------|---------------|
| CAT    | NOX3   | 9606.ENSP0   | 9606.ENSP0   | 0            | 0           | 0             |
| CAT    | HMOX1  | 9606.ENSP0   | 9606.ENSP0   | 0            | 0           | 0             |
| CAT    | TXN2   | 9606.ENSP0   | 9606.ENSP0   | 0            | 0           | 0             |
| CAT    | GSR    | 9606.ENSP0   | 9606.ENSP0   | 0            | 0           | 0             |
| CAT    | GCLC   | 9606.ENSP0   | 9606.ENSP0   | 0            | 0           | 0             |
| CAT    | MAPK14 | 9606.ENSP0   | 9606.ENSP0   | 0            | 0           | 0             |
| CAT    | MAPK10 | 9606.ENSP0   | 9606.ENSP0   | 0            | 0           | 0             |
| CAT    | MAOA   | 9606.ENSP0   | 9606.ENSP0   | 0            | 0           | 0             |
| CAT    | CYP1A1 | 9606.ENSP0   | 9606.ENSP0   | 0.045        | 0           | 0             |
| CAT    | FOS    | 9606.ENSP0   | 9606.ENSP0   | 0            | 0           | 0             |
| CAT    | NOX5   | 9606.ENSP0   | 9606.ENSP0   | 0            | 0           | 0             |
| CAT    | MT1X   | 9606.ENSP0   | 9606.ENSP0   | 0            | 0           | 0             |
| CAT    | XDH    | 9606.ENSP0   | 9606.ENSP0   | 0            | 0           | 0             |
| CAT    | NFE2L2 | 9606.ENSP0   | 9606.ENSP0   | 0            | 0           | 0             |
| CAT    | NOX1   | 9606.ENSP0   | 9606.ENSP0   | 0            | 0           | 0             |
| CAT    | NQO1   | 9606.ENSP0   | 9606.ENSP0   | 0            | 0           | 0             |
| CAT    | TXNRD2 | 9606.ENSP0   | 9606.ENSP0   | 0            | 0           | 0             |
| CAT    | NOX4   | 9606.ENSP0   | 9606.ENSP0   | 0            | 0           | 0             |
| CAT    | CYBB   | 9606.ENSP0   | 9606.ENSP0   | 0            | 0           | 0             |
| CAT    | GPX3   | 9606.ENSP0   | 9606.ENSP0   | 0            | 0           | 0             |
| CAT    | TXNRD1 | 9606.ENSP0   | 9606.ENSP0   | 0.142        | 0           | 0             |
| CAT    | GPX1   | 9606.ENSP0   | 9606.ENSP0   | 0            | 0           | 0             |
| CAT    | SOD3   | 9606.ENSP0   | 9606.ENSP0   | 0.11         | 0           | 0             |
| CAT    | SOD1   | 9606.ENSP0   | 9606.ENSP0   | 0.11         | 0           | 0             |
| CAT    | SOD2   | 9606.ENSP0   | 9606.ENSP0   | 0.069        | 0           | 0             |
| CYBB   | HMOX1  | 9606.ENSP0   | 9606.ENSP0   | 0            | 0           | 0             |
| CYBB   | GSR    | 9606.ENSP0   | 9606.ENSP0   | 0            | 0           | 0             |
| CYBB   | MAPK14 | 9606.ENSP0   | 9606.ENSP0   | 0            | 0           | 0             |
| CYBB   | NOX4   | 9606.ENSP0   | 9606.ENSP0   | 0            | 0           | 0             |
| CYBB   | SOD1   | 9606.ENSP0   | 9606.ENSP0   | 0            | 0           | 0             |
| CYBB   | NQO1   | 9606.ENSP0   | 9606.ENSP0   | 0            | 0           | 0             |
| CYBB   | MAPK10 | 9606.ENSP0   | 9606.ENSP0   | 0            | 0           | 0             |
| CYBB   | NOX1   | 9606.ENSP0   | 9606.ENSP0   | 0            | 0           | 0             |
| CYBB   | GPX3   | 9606.ENSP0   | 9606.ENSP0   | 0            | 0           | 0             |
| CYBB   | NFE2L2 | 9606.ENSP0   | 9606.ENSP0   | 0            | 0           | 0             |
| CYBB   | GPX1   | 9606.ENSP0   | 9606.ENSP0   | 0            | 0           | 0             |
| CYBB   | XDH    | 9606.ENSP0   | 9606.ENSP0   | 0            | 0           | 0             |
| CYBB   | SOD3   | 9606.ENSP0   | 9606.ENSP0   | 0            | 0           | 0             |
| CYBB   | SOD2   | 9606.ENSP0   | 9606.ENSP0   | 0            | 0           | 0             |
| CYP1A1 | HMOX1  | 9606.ENSP0   | 9606.ENSP0   | 0            | 0           | 0             |
| CYP1A1 | GSTT2B | 9606.ENSP0   | 9606.ENSP0   | 0            | 0           | 0             |
| CYP1A1 | UGT1A6 | 9606.ENSP0   | 9606.ENSP0   | 0            | 0           | 0             |
| CYP1A1 | NQO1   | 9606.ENSP0   | 9606.ENSP0   | 0            | 0           | 0             |
| CYP1A1 | GPX1   | 9606.ENSP0   | 9606.ENSP0   | 0            | 0           | 0             |
| CYP1A1 | NFE2L2 | 9606.ENSP0   | 9606.ENSP0   | 0            | 0           | 0             |
| CYP1A1 | MGST1  | 9606.ENSP0   | 9606.ENSP0   | 0            | 0           | 0             |
| FOS    | HMOX1  | 9606.ENSP0   | 9606.ENSP0   | 0            | 0           | 0             |

|      |        |                        |       |   |   |
|------|--------|------------------------|-------|---|---|
| FOS  | NFKB1  | 9606.ENSP0(9606.ENSP0( | 0     | 0 | 0 |
| FOS  | MAPK14 | 9606.ENSP0(9606.ENSP0( | 0     | 0 | 0 |
| FOS  | UGT1A6 | 9606.ENSP0(9606.ENSP0( | 0     | 0 | 0 |
| FOS  | JUNB   | 9606.ENSP0(9606.ENSP0( | 0     | 0 | 0 |
| FOS  | NQO1   | 9606.ENSP0(9606.ENSP0( | 0     | 0 | 0 |
| FOS  | NFE2L2 | 9606.ENSP0(9606.ENSP0( | 0     | 0 | 0 |
| FOS  | SP1    | 9606.ENSP0(9606.ENSP0( | 0     | 0 | 0 |
| FOS  | MAPK10 | 9606.ENSP0(9606.ENSP0( | 0     | 0 | 0 |
| GCLC | HMOX1  | 9606.ENSP0(9606.ENSP0( | 0     | 0 | 0 |
| GCLC | TXN2   | 9606.ENSP0(9606.ENSP0( | 0     | 0 | 0 |
| GCLC | GSR    | 9606.ENSP0(9606.ENSP0( | 0     | 0 | 0 |
| GCLC | MGST1  | 9606.ENSP0(9606.ENSP0( | 0     | 0 | 0 |
| GCLC | GSTT2B | 9606.ENSP0(9606.ENSP0( | 0     | 0 | 0 |
| GCLC | TXNRD2 | 9606.ENSP0(9606.ENSP0( | 0     | 0 | 0 |
| GCLC | GPX3   | 9606.ENSP0(9606.ENSP0( | 0     | 0 | 0 |
| GCLC | SOD3   | 9606.ENSP0(9606.ENSP0( | 0     | 0 | 0 |
| GCLC | GPX1   | 9606.ENSP0(9606.ENSP0( | 0     | 0 | 0 |
| GCLC | SOD1   | 9606.ENSP0(9606.ENSP0( | 0     | 0 | 0 |
| GCLC | SOD2   | 9606.ENSP0(9606.ENSP0( | 0     | 0 | 0 |
| GCLC | TXNRD1 | 9606.ENSP0(9606.ENSP0( | 0     | 0 | 0 |
| GCLC | NQO1   | 9606.ENSP0(9606.ENSP0( | 0     | 0 | 0 |
| GCLC | NFE2L2 | 9606.ENSP0(9606.ENSP0( | 0     | 0 | 0 |
| GPX1 | HMOX1  | 9606.ENSP0(9606.ENSP0( | 0     | 0 | 0 |
| GPX1 | TXN2   | 9606.ENSP0(9606.ENSP0( | 0     | 0 | 0 |
| GPX1 | GSR    | 9606.ENSP0(9606.ENSP0( | 0.049 | 0 | 0 |
| GPX1 | NOX4   | 9606.ENSP0(9606.ENSP0( | 0     | 0 | 0 |
| GPX1 | SOD1   | 9606.ENSP0(9606.ENSP0( | 0.044 | 0 | 0 |
| GPX1 | GSTT2B | 9606.ENSP0(9606.ENSP0( | 0     | 0 | 0 |
| GPX1 | NQO1   | 9606.ENSP0(9606.ENSP0( | 0     | 0 | 0 |
| GPX1 | NOX1   | 9606.ENSP0(9606.ENSP0( | 0     | 0 | 0 |
| GPX1 | XDH    | 9606.ENSP0(9606.ENSP0( | 0     | 0 | 0 |
| GPX1 | SOD3   | 9606.ENSP0(9606.ENSP0( | 0.044 | 0 | 0 |
| GPX1 | MGST1  | 9606.ENSP0(9606.ENSP0( | 0     | 0 | 0 |
| GPX1 | NFE2L2 | 9606.ENSP0(9606.ENSP0( | 0     | 0 | 0 |
| GPX1 | TXNRD2 | 9606.ENSP0(9606.ENSP0( | 0.049 | 0 | 0 |
| GPX1 | TXNRD1 | 9606.ENSP0(9606.ENSP0( | 0.23  | 0 | 0 |
| GPX1 | SOD2   | 9606.ENSP0(9606.ENSP0( | 0     | 0 | 0 |
| GPX3 | HMOX1  | 9606.ENSP0(9606.ENSP0( | 0     | 0 | 0 |
| GPX3 | TXN2   | 9606.ENSP0(9606.ENSP0( | 0     | 0 | 0 |
| GPX3 | GSR    | 9606.ENSP0(9606.ENSP0( | 0.049 | 0 | 0 |
| GPX3 | NOX4   | 9606.ENSP0(9606.ENSP0( | 0     | 0 | 0 |
| GPX3 | SOD1   | 9606.ENSP0(9606.ENSP0( | 0.044 | 0 | 0 |
| GPX3 | GSTT2B | 9606.ENSP0(9606.ENSP0( | 0     | 0 | 0 |
| GPX3 | NQO1   | 9606.ENSP0(9606.ENSP0( | 0     | 0 | 0 |
| GPX3 | NOX1   | 9606.ENSP0(9606.ENSP0( | 0     | 0 | 0 |
| GPX3 | SOD3   | 9606.ENSP0(9606.ENSP0( | 0.044 | 0 | 0 |
| GPX3 | NFE2L2 | 9606.ENSP0(9606.ENSP0( | 0     | 0 | 0 |
| GPX3 | TXNRD2 | 9606.ENSP0(9606.ENSP0( | 0.049 | 0 | 0 |
| GPX3 | MGST1  | 9606.ENSP0(9606.ENSP0( | 0     | 0 | 0 |

|        |        |                        |       |   |       |
|--------|--------|------------------------|-------|---|-------|
| GPX3   | TXNRD1 | 9606.ENSP0(9606.ENSP0( | 0.23  | 0 | 0     |
| GPX3   | SOD2   | 9606.ENSP0(9606.ENSP0( | 0     | 0 | 0     |
| GSR    | HMOX1  | 9606.ENSP0(9606.ENSP0( | 0     | 0 | 0     |
| GSR    | TXN2   | 9606.ENSP0(9606.ENSP0( | 0.05  | 0 | 0     |
| GSR    | TXNRD1 | 9606.ENSP0(9606.ENSP0( | 0.069 | 0 | 0.428 |
| GSR    | NOX1   | 9606.ENSP0(9606.ENSP0( | 0     | 0 | 0     |
| GSR    | NOX4   | 9606.ENSP0(9606.ENSP0( | 0     | 0 | 0     |
| GSR    | MT1X   | 9606.ENSP0(9606.ENSP0( | 0     | 0 | 0     |
| GSR    | XDH    | 9606.ENSP0(9606.ENSP0( | 0     | 0 | 0     |
| GSR    | NFE2L2 | 9606.ENSP0(9606.ENSP0( | 0     | 0 | 0     |
| GSR    | NQO1   | 9606.ENSP0(9606.ENSP0( | 0     | 0 | 0     |
| GSR    | SOD3   | 9606.ENSP0(9606.ENSP0( | 0     | 0 | 0     |
| GSR    | GSTT2B | 9606.ENSP0(9606.ENSP0( | 0     | 0 | 0     |
| GSR    | MGST1  | 9606.ENSP0(9606.ENSP0( | 0     | 0 | 0     |
| GSR    | SOD1   | 9606.ENSP0(9606.ENSP0( | 0     | 0 | 0     |
| GSR    | SOD2   | 9606.ENSP0(9606.ENSP0( | 0.071 | 0 | 0     |
| GSTT2B | NQO1   | 9606.ENSP0(9606.ENSP0( | 0     | 0 | 0     |
| GSTT2B | TXNRD1 | 9606.ENSP0(9606.ENSP0( | 0     | 0 | 0     |
| GSTT2B | MGST1  | 9606.ENSP0(9606.ENSP0( | 0     | 0 | 0     |
| HMOX1  | MT1X   | 9606.ENSP0(9606.ENSP0( | 0     | 0 | 0     |
| HMOX1  | UGT1A6 | 9606.ENSP0(9606.ENSP0( | 0     | 0 | 0     |
| HMOX1  | NOX1   | 9606.ENSP0(9606.ENSP0( | 0     | 0 | 0     |
| HMOX1  | SOD3   | 9606.ENSP0(9606.ENSP0( | 0     | 0 | 0     |
| HMOX1  | SOD1   | 9606.ENSP0(9606.ENSP0( | 0     | 0 | 0     |
| HMOX1  | TXNRD1 | 9606.ENSP0(9606.ENSP0( | 0     | 0 | 0     |
| HMOX1  | NOX4   | 9606.ENSP0(9606.ENSP0( | 0     | 0 | 0     |
| HMOX1  | SOD2   | 9606.ENSP0(9606.ENSP0( | 0.071 | 0 | 0     |
| HMOX1  | NQO1   | 9606.ENSP0(9606.ENSP0( | 0     | 0 | 0     |
| HMOX1  | MAPK14 | 9606.ENSP0(9606.ENSP0( | 0     | 0 | 0     |
| HMOX1  | NFE2L2 | 9606.ENSP0(9606.ENSP0( | 0     | 0 | 0     |
| JUNB   | MAPK14 | 9606.ENSP0(9606.ENSP0( | 0     | 0 | 0     |
| JUNB   | MAPK10 | 9606.ENSP0(9606.ENSP0( | 0     | 0 | 0     |
| JUNB   | SP1    | 9606.ENSP0(9606.ENSP0( | 0     | 0 | 0     |
| MAPK10 | NFKB1  | 9606.ENSP0(9606.ENSP0( | 0     | 0 | 0     |
| MAPK10 | MAPK14 | 9606.ENSP0(9606.ENSP0( | 0     | 0 | 0.347 |
| MAPK10 | SP1    | 9606.ENSP0(9606.ENSP0( | 0     | 0 | 0     |
| MAPK14 | NFKB1  | 9606.ENSP0(9606.ENSP0( | 0     | 0 | 0     |
| MAPK14 | NOX1   | 9606.ENSP0(9606.ENSP0( | 0     | 0 | 0     |
| MAPK14 | SOD3   | 9606.ENSP0(9606.ENSP0( | 0     | 0 | 0     |
| MAPK14 | SOD1   | 9606.ENSP0(9606.ENSP0( | 0     | 0 | 0     |
| MAPK14 | NOX4   | 9606.ENSP0(9606.ENSP0( | 0     | 0 | 0     |
| MAPK14 | SOD2   | 9606.ENSP0(9606.ENSP0( | 0     | 0 | 0     |
| MAPK14 | SP1    | 9606.ENSP0(9606.ENSP0( | 0     | 0 | 0     |
| MGST1  | NQO1   | 9606.ENSP0(9606.ENSP0( | 0     | 0 | 0     |
| MT1X   | SOD1   | 9606.ENSP0(9606.ENSP0( | 0     | 0 | 0     |
| MT1X   | NQO1   | 9606.ENSP0(9606.ENSP0( | 0     | 0 | 0     |
| MT1X   | SOD3   | 9606.ENSP0(9606.ENSP0( | 0     | 0 | 0     |
| MT1X   | SOD2   | 9606.ENSP0(9606.ENSP0( | 0     | 0 | 0     |
| NFE2L2 | NOX4   | 9606.ENSP0(9606.ENSP0( | 0     | 0 | 0     |

|        |        |                        |       |   |       |
|--------|--------|------------------------|-------|---|-------|
| NFE2L2 | SOD1   | 9606.ENSPO(9606.ENSPO( | 0     | 0 | 0     |
| NFE2L2 | UGT1A6 | 9606.ENSPO(9606.ENSPO( | 0     | 0 | 0     |
| NFE2L2 | NQO1   | 9606.ENSPO(9606.ENSPO( | 0     | 0 | 0     |
| NFE2L2 | SP1    | 9606.ENSPO(9606.ENSPO( | 0     | 0 | 0     |
| NFE2L2 | NOX1   | 9606.ENSPO(9606.ENSPO( | 0     | 0 | 0     |
| NFE2L2 | SOD3   | 9606.ENSPO(9606.ENSPO( | 0     | 0 | 0     |
| NFE2L2 | TXNRD1 | 9606.ENSPO(9606.ENSPO( | 0     | 0 | 0     |
| NFE2L2 | SOD2   | 9606.ENSPO(9606.ENSPO( | 0     | 0 | 0     |
| NFKB1  | SOD2   | 9606.ENSPO(9606.ENSPO( | 0     | 0 | 0     |
| NFKB1  | SP1    | 9606.ENSPO(9606.ENSPO( | 0     | 0 | 0     |
| NOX1   | NOX4   | 9606.ENSPO(9606.ENSPO( | 0     | 0 | 0     |
| NOX1   | SOD1   | 9606.ENSPO(9606.ENSPO( | 0     | 0 | 0     |
| NOX1   | NQO1   | 9606.ENSPO(9606.ENSPO( | 0     | 0 | 0     |
| NOX1   | XDH    | 9606.ENSPO(9606.ENSPO( | 0     | 0 | 0     |
| NOX1   | SOD2   | 9606.ENSPO(9606.ENSPO( | 0     | 0 | 0     |
| NOX1   | SOD3   | 9606.ENSPO(9606.ENSPO( | 0     | 0 | 0     |
| NOX3   | SOD2   | 9606.ENSPO(9606.ENSPO( | 0     | 0 | 0     |
| NOX3   | XDH    | 9606.ENSPO(9606.ENSPO( | 0     | 0 | 0     |
| NOX3   | SOD3   | 9606.ENSPO(9606.ENSPO( | 0     | 0 | 0     |
| NOX3   | NOX4   | 9606.ENSPO(9606.ENSPO( | 0     | 0 | 0     |
| NOX3   | SOD1   | 9606.ENSPO(9606.ENSPO( | 0     | 0 | 0     |
| NOX4   | TXN2   | 9606.ENSPO(9606.ENSPO( | 0     | 0 | 0     |
| NOX4   | NQO1   | 9606.ENSPO(9606.ENSPO( | 0     | 0 | 0     |
| NOX4   | TXNRD1 | 9606.ENSPO(9606.ENSPO( | 0     | 0 | 0     |
| NOX4   | XDH    | 9606.ENSPO(9606.ENSPO( | 0     | 0 | 0     |
| NOX4   | SOD1   | 9606.ENSPO(9606.ENSPO( | 0     | 0 | 0     |
| NOX4   | SOD3   | 9606.ENSPO(9606.ENSPO( | 0     | 0 | 0     |
| NOX4   | SOD2   | 9606.ENSPO(9606.ENSPO( | 0     | 0 | 0     |
| NOX5   | SOD1   | 9606.ENSPO(9606.ENSPO( | 0     | 0 | 0     |
| NOX5   | SOD3   | 9606.ENSPO(9606.ENSPO( | 0     | 0 | 0     |
| NOX5   | SOD2   | 9606.ENSPO(9606.ENSPO( | 0     | 0 | 0     |
| NQO1   | SOD1   | 9606.ENSPO(9606.ENSPO( | 0     | 0 | 0     |
| NQO1   | UGT1A6 | 9606.ENSPO(9606.ENSPO( | 0     | 0 | 0     |
| NQO1   | SOD3   | 9606.ENSPO(9606.ENSPO( | 0     | 0 | 0     |
| NQO1   | SOD2   | 9606.ENSPO(9606.ENSPO( | 0     | 0 | 0     |
| NQO1   | TXNRD1 | 9606.ENSPO(9606.ENSPO( | 0     | 0 | 0     |
| SOD1   | TXN2   | 9606.ENSPO(9606.ENSPO( | 0     | 0 | 0     |
| SOD1   | XDH    | 9606.ENSPO(9606.ENSPO( | 0     | 0 | 0     |
| SOD1   | TXNRD2 | 9606.ENSPO(9606.ENSPO( | 0     | 0 | 0     |
| SOD1   | TXNRD1 | 9606.ENSPO(9606.ENSPO( | 0     | 0 | 0     |
| SOD1   | SOD3   | 9606.ENSPO(9606.ENSPO( | 0     | 0 | 0.281 |
| SOD1   | SOD2   | 9606.ENSPO(9606.ENSPO( | 0     | 0 | 0     |
| SOD2   | TXN2   | 9606.ENSPO(9606.ENSPO( | 0     | 0 | 0     |
| SOD2   | SP1    | 9606.ENSPO(9606.ENSPO( | 0     | 0 | 0     |
| SOD2   | XDH    | 9606.ENSPO(9606.ENSPO( | 0     | 0 | 0     |
| SOD2   | SOD3   | 9606.ENSPO(9606.ENSPO( | 0     | 0 | 0     |
| SOD2   | TXNRD2 | 9606.ENSPO(9606.ENSPO( | 0.071 | 0 | 0     |
| SOD2   | TXNRD1 | 9606.ENSPO(9606.ENSPO( | 0.247 | 0 | 0     |
| SOD3   | TXN2   | 9606.ENSPO(9606.ENSPO( | 0     | 0 | 0     |

|        |        |                        |       |   |       |
|--------|--------|------------------------|-------|---|-------|
| SOD3   | XDH    | 9606.ENSP0(9606.ENSP0( | 0     | 0 | 0     |
| SOD3   | TXNRD2 | 9606.ENSP0(9606.ENSP0( | 0     | 0 | 0     |
| SOD3   | TXNRD1 | 9606.ENSP0(9606.ENSP0( | 0     | 0 | 0     |
| TXN2   | TXNRD1 | 9606.ENSP0(9606.ENSP0( | 0.179 | 0 | 0     |
| TXN2   | TXNRD2 | 9606.ENSP0(9606.ENSP0( | 0.05  | 0 | 0     |
| TXNRD1 | TXNRD2 | 9606.ENSP0(9606.ENSP0( | 0.069 | 0 | 0.444 |

| homology | coexpression | experimental | database_ann | automated_te | combined_score |
|----------|--------------|--------------|--------------|--------------|----------------|
| 0        | 0            | 0            | 0            | 0.574        | 0.574          |
| 0        | 0.062        | 0.194        | 0            | 0.883        | 0.904          |
| 0        | 0.126        | 0.185        | 0            | 0.816        | 0.858          |
| 0        | 0.225        | 0.457        | 0            | 0.972        | 0.987          |
| 0        | 0.141        | 0.457        | 0            | 0.838        | 0.917          |
| 0        | 0            | 0.177        | 0            | 0.604        | 0.66           |
| 0        | 0            | 0            | 0            | 0.451        | 0.451          |
| 0        | 0            | 0            | 0            | 0.49         | 0.49           |
| 0        | 0.061        | 0            | 0            | 0.501        | 0.514          |
| 0        | 0.061        | 0            | 0            | 0.519        | 0.529          |
| 0        | 0            | 0            | 0            | 0.645        | 0.645          |
| 0        | 0.077        | 0            | 0            | 0.676        | 0.688          |
| 0        | 0.062        | 0            | 0            | 0.71         | 0.717          |
| 0        | 0            | 0            | 0            | 0.743        | 0.743          |
| 0        | 0            | 0            | 0            | 0.748        | 0.748          |
| 0        | 0.062        | 0            | 0            | 0.751        | 0.756          |
| 0        | 0.116        | 0.323        | 0            | 0.636        | 0.763          |
| 0        | 0.062        | 0            | 0            | 0.775        | 0.78           |
| 0        | 0.067        | 0            | 0            | 0.778        | 0.784          |
| 0        | 0.14         | 0.134        | 0            | 0.861        | 0.887          |
| 0        | 0.188        | 0.323        | 0            | 0.806        | 0.896          |
| 0        | 0.14         | 0.134        | 0            | 0.905        | 0.923          |
| 0        | 0.129        | 0.13         | 0.9          | 0.866        | 0.989          |
| 0        | 0.129        | 0.44         | 0.9          | 0.937        | 0.996          |
| 0        | 0.08         | 0.419        | 0.9          | 0.968        | 0.998          |
| 0        | 0.069        | 0            | 0            | 0.76         | 0.767          |
| 0        | 0            | 0            | 0            | 0.495        | 0.495          |
| 0        | 0            | 0.124        | 0.65         | 0.416        | 0.805          |
| 0.874    | 0.061        | 0            | 0.9          | 0.96         | 0.913          |
| 0        | 0            | 0.265        | 0            | 0.679        | 0.754          |
| 0        | 0            | 0            | 0            | 0.438        | 0.438          |
| 0        | 0            | 0            | 0            | 0.555        | 0.555          |
| 0.959    | 0.061        | 0            | 0.8          | 0.939        | 0.811          |
| 0        | 0.061        | 0            | 0            | 0.44         | 0.452          |
| 0        | 0            | 0            | 0            | 0.477        | 0.477          |
| 0        | 0.062        | 0            | 0            | 0.565        | 0.575          |
| 0        | 0.063        | 0            | 0            | 0.608        | 0.617          |
| 0        | 0            | 0.164        | 0            | 0.626        | 0.674          |
| 0        | 0.092        | 0            | 0            | 0.693        | 0.709          |
| 0        | 0.064        | 0            | 0            | 0.535        | 0.547          |
| 0        | 0.061        | 0            | 0.65         | 0.425        | 0.794          |
| 0        | 0.179        | 0            | 0.65         | 0.741        | 0.919          |
| 0        | 0.085        | 0            | 0            | 0.741        | 0.753          |
| 0        | 0            | 0            | 0            | 0.412        | 0.412          |
| 0        | 0            | 0            | 0            | 0.466        | 0.466          |
| 0        | 0.062        | 0            | 0.65         | 0.264        | 0.737          |
| 0        | 0            | 0            | 0.9          | 0.482        | 0.946          |

|   |       |       |      |       |       |
|---|-------|-------|------|-------|-------|
| 0 | 0.051 | 0.402 | 0    | 0.512 | 0.699 |
| 0 | 0     | 0.264 | 0.9  | 0.733 | 0.978 |
| 0 | 0     | 0     | 0.9  | 0.115 | 0.907 |
| 0 | 0.824 | 0.884 | 0.9  | 0.852 | 0.999 |
| 0 | 0     | 0.379 | 0    | 0.412 | 0.619 |
| 0 | 0     | 0.051 | 0.9  | 0.426 | 0.94  |
| 0 | 0     | 0.073 | 0.9  | 0.476 | 0.947 |
| 0 | 0     | 0.26  | 0.9  | 0.56  | 0.964 |
| 0 | 0     | 0.261 | 0    | 0.855 | 0.888 |
| 0 | 0.062 | 0.094 | 0    | 0.379 | 0.426 |
| 0 | 0.188 | 0     | 0    | 0.881 | 0.899 |
| 0 | 0.061 | 0     | 0    | 0.389 | 0.401 |
| 0 | 0.077 | 0     | 0    | 0.44  | 0.461 |
| 0 | 0.115 | 0     | 0    | 0.455 | 0.497 |
| 0 | 0.061 | 0     | 0    | 0.505 | 0.516 |
| 0 | 0.052 | 0     | 0    | 0.59  | 0.594 |
| 0 | 0.061 | 0     | 0    | 0.755 | 0.76  |
| 0 | 0.061 | 0     | 0    | 0.757 | 0.762 |
| 0 | 0.065 | 0     | 0    | 0.852 | 0.855 |
| 0 | 0.189 | 0     | 0    | 0.831 | 0.857 |
| 0 | 0.062 | 0     | 0    | 0.876 | 0.878 |
| 0 | 0     | 0     | 0    | 0.885 | 0.886 |
| 0 | 0.081 | 0.17  | 0    | 0.718 | 0.766 |
| 0 | 0.061 | 0.106 | 0    | 0.691 | 0.718 |
| 0 | 0.064 | 0     | 0.9  | 0.872 | 0.987 |
| 0 | 0.061 | 0     | 0    | 0.576 | 0.585 |
| 0 | 0.093 | 0     | 0.9  | 0.866 | 0.986 |
| 0 | 0.064 | 0     | 0.65 | 0.345 | 0.766 |
| 0 | 0     | 0     | 0    | 0.675 | 0.675 |
| 0 | 0.061 | 0     | 0    | 0.517 | 0.527 |
| 0 | 0.062 | 0     | 0    | 0.39  | 0.403 |
| 0 | 0.093 | 0     | 0.9  | 0.731 | 0.973 |
| 0 | 0.064 | 0     | 0.65 | 0.404 | 0.787 |
| 0 | 0     | 0     | 0    | 0.591 | 0.591 |
| 0 | 0.063 | 0     | 0    | 0.724 | 0.733 |
| 0 | 0.148 | 0.065 | 0    | 0.841 | 0.889 |
| 0 | 0.061 | 0     | 0.9  | 0.885 | 0.988 |
| 0 | 0     | 0.17  | 0    | 0.638 | 0.686 |
| 0 | 0.061 | 0.106 | 0    | 0.654 | 0.684 |
| 0 | 0.064 | 0     | 0.9  | 0.853 | 0.985 |
| 0 | 0.061 | 0     | 0    | 0.495 | 0.505 |
| 0 | 0.093 | 0     | 0.9  | 0.73  | 0.973 |
| 0 | 0.064 | 0     | 0.65 | 0.324 | 0.759 |
| 0 | 0     | 0     | 0    | 0.498 | 0.498 |
| 0 | 0.061 | 0     | 0    | 0.41  | 0.422 |
| 0 | 0.16  | 0     | 0.9  | 0.665 | 0.969 |
| 0 | 0     | 0     | 0    | 0.443 | 0.443 |
| 0 | 0.063 | 0     | 0    | 0.659 | 0.669 |
| 0 | 0.061 | 0     | 0.65 | 0.307 | 0.752 |

|       |       |       |      |       |       |
|-------|-------|-------|------|-------|-------|
| 0     | 0.148 | 0.065 | 0    | 0.778 | 0.846 |
| 0     | 0.061 | 0     | 0.9  | 0.747 | 0.974 |
| 0     | 0.082 | 0.125 | 0    | 0.692 | 0.731 |
| 0     | 0.079 | 0.266 | 0    | 0.759 | 0.824 |
| 0.809 | 0.208 | 0     | 0    | 0.87  | 0.407 |
| 0     | 0     | 0     | 0    | 0.467 | 0.467 |
| 0     | 0     | 0     | 0    | 0.493 | 0.493 |
| 0     | 0     | 0     | 0    | 0.538 | 0.538 |
| 0     | 0     | 0     | 0    | 0.563 | 0.563 |
| 0     | 0     | 0     | 0    | 0.674 | 0.674 |
| 0     | 0.063 | 0     | 0    | 0.711 | 0.717 |
| 0     | 0.061 | 0.13  | 0    | 0.763 | 0.789 |
| 0     | 0.109 | 0     | 0.65 | 0.386 | 0.792 |
| 0     | 0.061 | 0     | 0.65 | 0.433 | 0.797 |
| 0     | 0.072 | 0.13  | 0    | 0.868 | 0.884 |
| 0     | 0.113 | 0     | 0    | 0.906 | 0.916 |
| 0     | 0     | 0     | 0    | 0.4   | 0.4   |
| 0     | 0.112 | 0.083 | 0    | 0.387 | 0.457 |
| 0     | 0.062 | 0     | 0.65 | 0.465 | 0.809 |
| 0     | 0     | 0     | 0    | 0.428 | 0.428 |
| 0     | 0     | 0     | 0    | 0.498 | 0.498 |
| 0     | 0     | 0     | 0    | 0.57  | 0.57  |
| 0     | 0     | 0     | 0    | 0.591 | 0.591 |
| 0     | 0     | 0     | 0    | 0.728 | 0.728 |
| 0     | 0.065 | 0.157 | 0    | 0.699 | 0.742 |
| 0     | 0     | 0     | 0    | 0.754 | 0.754 |
| 0     | 0.063 | 0     | 0    | 0.763 | 0.776 |
| 0     | 0.056 | 0     | 0    | 0.951 | 0.952 |
| 0     | 0     | 0     | 0.9  | 0.735 | 0.972 |
| 0     | 0     | 0     | 0.9  | 0.968 | 0.996 |
| 0     | 0     | 0.424 | 0.6  | 0.195 | 0.798 |
| 0     | 0     | 0.351 | 0.6  | 0.325 | 0.809 |
| 0     | 0.046 | 0.095 | 0.9  | 0.295 | 0.931 |
| 0     | 0     | 0.261 | 0.8  | 0.285 | 0.885 |
| 0.921 | 0.064 | 0.052 | 0.9  | 0.594 | 0.91  |
| 0     | 0     | 0.071 | 0.9  | 0.208 | 0.92  |
| 0     | 0.065 | 0.185 | 0.9  | 0.409 | 0.948 |
| 0     | 0     | 0.124 | 0    | 0.351 | 0.407 |
| 0     | 0     | 0.157 | 0    | 0.378 | 0.453 |
| 0     | 0     | 0.177 | 0    | 0.413 | 0.496 |
| 0     | 0     | 0.087 | 0    | 0.578 | 0.598 |
| 0     | 0.059 | 0.185 | 0    | 0.53  | 0.608 |
| 0     | 0     | 0.443 | 0.9  | 0.376 | 0.962 |
| 0     | 0.088 | 0     | 0    | 0.39  | 0.419 |
| 0     | 0.049 | 0.17  | 0    | 0.535 | 0.601 |
| 0     | 0     | 0     | 0    | 0.509 | 0.509 |
| 0     | 0     | 0.17  | 0    | 0.333 | 0.423 |
| 0     | 0.062 | 0     | 0    | 0.487 | 0.498 |
| 0     | 0     | 0     | 0    | 0.515 | 0.515 |



|       |       |       |      |       |       |
|-------|-------|-------|------|-------|-------|
| 0     | 0     | 0     | 0    | 0.683 | 0.683 |
| 0     | 0     | 0     | 0.9  | 0.402 | 0.937 |
| 0     | 0     | 0     | 0    | 0.94  | 0.941 |
| 0     | 0     | 0.294 | 0    | 0.25  | 0.447 |
| 0     | 0     | 0     | 0    | 0.445 | 0.445 |
| 0     | 0     | 0     | 0    | 0.51  | 0.51  |
| 0     | 0     | 0     | 0    | 0.638 | 0.638 |
| 0     | 0     | 0     | 0    | 0.82  | 0.821 |
| 0     | 0     | 0     | 0    | 0.696 | 0.697 |
| 0     | 0.072 | 0.432 | 0    | 0.535 | 0.734 |
| 0.859 | 0.061 | 0     | 0.8  | 0.945 | 0.83  |
| 0     | 0     | 0.19  | 0    | 0.585 | 0.65  |
| 0     | 0     | 0     | 0    | 0.428 | 0.428 |
| 0     | 0.055 | 0     | 0    | 0.569 | 0.575 |
| 0     | 0.064 | 0     | 0    | 0.606 | 0.615 |
| 0     | 0.061 | 0.164 | 0    | 0.6   | 0.658 |
| 0     | 0.064 | 0     | 0    | 0.396 | 0.41  |
| 0     | 0.058 | 0     | 0    | 0.411 | 0.421 |
| 0     | 0     | 0.164 | 0    | 0.358 | 0.44  |
| 0.859 | 0.061 | 0     | 0.36 | 0.885 | 0.451 |
| 0     | 0     | 0.26  | 0    | 0.374 | 0.517 |
| 0     | 0.061 | 0.05  | 0    | 0.427 | 0.445 |
| 0     | 0     | 0     | 0    | 0.402 | 0.402 |
| 0     | 0     | 0     | 0    | 0.444 | 0.444 |
| 0     | 0.061 | 0     | 0    | 0.574 | 0.583 |
| 0     | 0     | 0.164 | 0    | 0.629 | 0.676 |
| 0     | 0.061 | 0.164 | 0    | 0.625 | 0.68  |
| 0     | 0.064 | 0     | 0    | 0.692 | 0.699 |
| 0     | 0     | 0.164 | 0    | 0.595 | 0.647 |
| 0     | 0     | 0.164 | 0    | 0.447 | 0.518 |
| 0     | 0.064 | 0     | 0    | 0.497 | 0.509 |
| 0     | 0.061 | 0     | 0    | 0.665 | 0.672 |
| 0     | 0.062 | 0     | 0    | 0.698 | 0.704 |
| 0     | 0.046 | 0     | 0    | 0.453 | 0.456 |
| 0     | 0     | 0     | 0    | 0.703 | 0.703 |
| 0     | 0.152 | 0     | 0    | 0.708 | 0.742 |
| 0     | 0.104 | 0.504 | 0    | 0.511 | 0.764 |
| 0     | 0     | 0     | 0    | 0.571 | 0.571 |
| 0     | 0.061 | 0.185 | 0    | 0.625 | 0.688 |
| 0     | 0.068 | 0.185 | 0    | 0.733 | 0.78  |
| 0.865 | 0     | 0     | 0.9  | 0.84  | 0.914 |
| 0     | 0.176 | 0.624 | 0.9  | 0.959 | 0.998 |
| 0     | 0.083 | 0     | 0    | 0.697 | 0.711 |
| 0     | 0     | 0.081 | 0    | 0.578 | 0.595 |
| 0     | 0     | 0     | 0    | 0.556 | 0.556 |
| 0     | 0.114 | 0.345 | 0.9  | 0.929 | 0.995 |
| 0     | 0.109 | 0     | 0    | 0.685 | 0.716 |
| 0     | 0.147 | 0     | 0    | 0.834 | 0.884 |
| 0     | 0.064 | 0.186 | 0    | 0.336 | 0.45  |

|      |       |       |     |       |       |
|------|-------|-------|-----|-------|-------|
| 0    | 0.063 | 0     | 0   | 0.539 | 0.549 |
| 0    | 0.061 | 0.168 | 0   | 0.5   | 0.575 |
| 0    | 0.063 | 0.168 | 0   | 0.671 | 0.721 |
| 0    | 0.135 | 0.339 | 0   | 0.728 | 0.855 |
| 0    | 0.079 | 0.266 | 0.9 | 0.766 | 0.982 |
| 0.95 | 0.082 | 0     | 0.8 | 0.883 | 0.826 |

**Table S6: Three levels of oxidative stress gene mRNA regulation**

|        | TCGA-A3-3306-01 | TCGA-A3-3329-01 | TCGA-B8-5550-01 | TCGA-A3-3378-01 |
|--------|-----------------|-----------------|-----------------|-----------------|
| MGST1  | NOCHANGE        | NOCHANGE        | NOCHANGE        | NOCHANGE        |
| HMOX1  | UP              | UP              | UP              | UP              |
| NOX4   | NOCHANGE        | NOCHANGE        | NOCHANGE        | NOCHANGE        |
| MAPK10 | DOWN            | DOWN            | DOWN            | DOWN            |
| SOD2   | NOCHANGE        | UP              | UP              | UP              |
| UGT1A6 | NOCHANGE        | NOCHANGE        | UP              | UP              |
| CYP1A1 | NOCHANGE        | DOWN            | DOWN            | DOWN            |
| MT1X   | NOCHANGE        | NOCHANGE        | NOCHANGE        | NOCHANGE        |
| XDH    | NOCHANGE        | DOWN            | UP              | UP              |
| TXNRD2 | NOCHANGE        | NOCHANGE        | NOCHANGE        | NOCHANGE        |
| NOX1   | NOCHANGE        | NOCHANGE        | DOWN            | NOCHANGE        |
| NOX5   | DOWN            | DOWN            | DOWN            | DOWN            |
| GPX3   | NOCHANGE        | NOCHANGE        | NOCHANGE        | NOCHANGE        |
| MAPK14 | NOCHANGE        | NOCHANGE        | NOCHANGE        | NOCHANGE        |
| SOD3   | DOWN            | DOWN            | NOCHANGE        | DOWN            |
| GCLC   | NOCHANGE        | NOCHANGE        | NOCHANGE        | NOCHANGE        |
| NFKB1  | NOCHANGE        | UP              | NOCHANGE        | NOCHANGE        |
| SOD1   | NOCHANGE        | NOCHANGE        | DOWN            | DOWN            |
| SP1    | NOCHANGE        | NOCHANGE        | NOCHANGE        | UP              |
| MAOA   | UP              | NOCHANGE        | NOCHANGE        | NOCHANGE        |
| CYBB   | NOCHANGE        | UP              | UP              | UP              |
| NFIX   | NOCHANGE        | UP              | UP              | NOCHANGE        |
| TXNRD1 | DOWN            | NOCHANGE        | NOCHANGE        | NOCHANGE        |
| TXN2   | UP              | NOCHANGE        | NOCHANGE        | DOWN            |
| CAT    | NOCHANGE        | NOCHANGE        | DOWN            | NOCHANGE        |
| NQO1   | DOWN            | DOWN            | NOCHANGE        | DOWN            |
| NOX3   | NOCHANGE        | NOCHANGE        | NOCHANGE        | NOCHANGE        |
| JUNB   | NOCHANGE        | NOCHANGE        | NOCHANGE        | NOCHANGE        |
| NFE2L2 | NOCHANGE        | NOCHANGE        | NOCHANGE        | NOCHANGE        |
| FOS    | NOCHANGE        | NOCHANGE        | DOWN            | NOCHANGE        |
| GSR    | NOCHANGE        | DOWN            | NOCHANGE        | DOWN            |

| TCGA-A3-3343-01 | TCGA-B0-5100-01 | TCGA-CJ-4869-01 | TCGA-CJ-4895-01 | TCGA-B0-5691-01 |
|-----------------|-----------------|-----------------|-----------------|-----------------|
| NOCHANGE        | NOCHANGE        | NOCHANGE        | NOCHANGE        | NOCHANGE        |
| UP              | NOCHANGE        | UP              | UP              | UP              |
| NOCHANGE        | NOCHANGE        | NOCHANGE        | NOCHANGE        | NOCHANGE        |
| DOWN            | DOWN            | DOWN            | DOWN            | NOCHANGE        |
| UP              | DOWN            | UP              | UP              | NOCHANGE        |
| NOCHANGE        | DOWN            | NOCHANGE        | UP              | NOCHANGE        |
| DOWN            | DOWN            | NOCHANGE        | DOWN            | NOCHANGE        |
| NOCHANGE        | NOCHANGE        | NOCHANGE        | NOCHANGE        | NOCHANGE        |
| NOCHANGE        | NOCHANGE        | NOCHANGE        | NOCHANGE        | NOCHANGE        |
| NOCHANGE        | NOCHANGE        | UP              | NOCHANGE        | NOCHANGE        |
| NOCHANGE        | NOCHANGE        | NOCHANGE        | NOCHANGE        | NOCHANGE        |
| NOCHANGE        | UP              | NOCHANGE        | NOCHANGE        | NOCHANGE        |
| NOCHANGE        | DOWN            | NOCHANGE        | NOCHANGE        | DOWN            |
| NOCHANGE        | NOCHANGE        | NOCHANGE        | DOWN            | NOCHANGE        |
| NOCHANGE        | NOCHANGE        | NOCHANGE        | NOCHANGE        | NOCHANGE        |
| NOCHANGE        | DOWN            | NOCHANGE        | NOCHANGE        | NOCHANGE        |
| DOWN            | UP              | NOCHANGE        | NOCHANGE        | NOCHANGE        |
| NOCHANGE        | DOWN            | NOCHANGE        | NOCHANGE        | NOCHANGE        |
| NOCHANGE        | DOWN            | NOCHANGE        | NOCHANGE        | NOCHANGE        |
| NOCHANGE        | DOWN            | NOCHANGE        | UP              | NOCHANGE        |
| NOCHANGE        | NOCHANGE        | NOCHANGE        | DOWN            | DOWN            |
| NOCHANGE        | NOCHANGE        | NOCHANGE        | NOCHANGE        | NOCHANGE        |
| DOWN            | DOWN            | DOWN            | DOWN            | NOCHANGE        |
| UP              | NOCHANGE        | NOCHANGE        | UP              | NOCHANGE        |
| UP              | UP              | NOCHANGE        | NOCHANGE        | UP              |
| DOWN            | DOWN            | NOCHANGE        | NOCHANGE        | NOCHANGE        |
| NOCHANGE        | NOCHANGE        | NOCHANGE        | NOCHANGE        | NOCHANGE        |
| NOCHANGE        | DOWN            | NOCHANGE        | DOWN            | DOWN            |
| NOCHANGE        | DOWN            | DOWN            | NOCHANGE        | NOCHANGE        |
| NOCHANGE        | DOWN            | NOCHANGE        | NOCHANGE        | NOCHANGE        |
| NOCHANGE        | NOCHANGE        | NOCHANGE        | NOCHANGE        | NOCHANGE        |
| NOCHANGE        | NOCHANGE        | NOCHANGE        | NOCHANGE        | NOCHANGE        |
| NOCHANGE        | NOCHANGE        | NOCHANGE        | NOCHANGE        | NOCHANGE        |
| DOWN            | DOWN            | NOCHANGE        | NOCHANGE        | NOCHANGE        |
| NOCHANGE        | NOCHANGE        | NOCHANGE        | NOCHANGE        | NOCHANGE        |
| NOCHANGE        | DOWN            | NOCHANGE        | NOCHANGE        | NOCHANGE        |

| TCGA-B0-5121-01. | TCGA-B0-5098-01. | TCGA-A3-3308-01 | TCGA-BP-4807-01. | TCGA-B0-5707-01. |
|------------------|------------------|-----------------|------------------|------------------|
| NOCHANGE         | NOCHANGE         | NOCHANGE        | NOCHANGE         | NOCHANGE         |
| UP               | NOCHANGE         | UP              | UP               | NOCHANGE         |
| NOCHANGE         | NOCHANGE         | NOCHANGE        | NOCHANGE         | NOCHANGE         |
| DOWN             | DOWN             | NOCHANGE        | DOWN             | DOWN             |
| NOCHANGE         | NOCHANGE         | UP              | NOCHANGE         | NOCHANGE         |
| NOCHANGE         | NOCHANGE         | NOCHANGE        | NOCHANGE         | NOCHANGE         |
| DOWN             | NOCHANGE         | NOCHANGE        | NOCHANGE         | NOCHANGE         |
| NOCHANGE         | NOCHANGE         | NOCHANGE        | DOWN             | NOCHANGE         |
| DOWN             | NOCHANGE         | NOCHANGE        | DOWN             | UP               |
| NOCHANGE         | NOCHANGE         | NOCHANGE        | NOCHANGE         | NOCHANGE         |
| NOCHANGE         | NOCHANGE         | DOWN            | NOCHANGE         | NOCHANGE         |
| NOCHANGE         | NOCHANGE         | UP              | NOCHANGE         | DOWN             |
| NOCHANGE         | NOCHANGE         | NOCHANGE        | NOCHANGE         | NOCHANGE         |
| DOWN             | NOCHANGE         | NOCHANGE        | NOCHANGE         | NOCHANGE         |
| DOWN             | DOWN             | DOWN            | NOCHANGE         | NOCHANGE         |
| NOCHANGE         | UP               | NOCHANGE        | NOCHANGE         | NOCHANGE         |
| NOCHANGE         | NOCHANGE         | NOCHANGE        | NOCHANGE         | NOCHANGE         |
| NOCHANGE         | NOCHANGE         | DOWN            | DOWN             | NOCHANGE         |
| NOCHANGE         | NOCHANGE         | NOCHANGE        | NOCHANGE         | NOCHANGE         |
| DOWN             | DOWN             | DOWN            | DOWN             | NOCHANGE         |
| NOCHANGE         | NOCHANGE         | UP              | UP               | NOCHANGE         |
| NOCHANGE         | NOCHANGE         | UP              | NOCHANGE         | NOCHANGE         |
| DOWN             | UP               | NOCHANGE        | NOCHANGE         | NOCHANGE         |
| DOWN             | DOWN             | DOWN            | NOCHANGE         | NOCHANGE         |
| DOWN             | DOWN             | DOWN            | NOCHANGE         | DOWN             |
| NOCHANGE         | UP               | DOWN            | NOCHANGE         | NOCHANGE         |
| NOCHANGE         | NOCHANGE         | NOCHANGE        | NOCHANGE         | NOCHANGE         |
| NOCHANGE         | NOCHANGE         | NOCHANGE        | NOCHANGE         | NOCHANGE         |
| DOWN             | NOCHANGE         | NOCHANGE        | NOCHANGE         | NOCHANGE         |
| DOWN             | NOCHANGE         | NOCHANGE        | NOCHANGE         | NOCHANGE         |
| DOWN             | UP               | NOCHANGE        | DOWN             | NOCHANGE         |

| TCGA-BP-4971-01. | TCGA-B8-4620-01. | TCGA-BP-4967-01. | TCGA-BP-5198-01. | TCGA-BP-4326-01. |
|------------------|------------------|------------------|------------------|------------------|
| NOCHANGE         | NOCHANGE         | NOCHANGE         | NOCHANGE         | NOCHANGE         |
| UP               | NOCHANGE         | UP               | UP               | NOCHANGE         |
| NOCHANGE         | NOCHANGE         | NOCHANGE         | NOCHANGE         | NOCHANGE         |
| DOWN             | DOWN             | DOWN             | DOWN             | DOWN             |
| NOCHANGE         | NOCHANGE         | NOCHANGE         | UP               | UP               |
| NOCHANGE         | NOCHANGE         | NOCHANGE         | UP               | DOWN             |
| NOCHANGE         | DOWN             | DOWN             | DOWN             | DOWN             |
| NOCHANGE         | NOCHANGE         | NOCHANGE         | UP               | NOCHANGE         |
| NOCHANGE         | DOWN             | NOCHANGE         | NOCHANGE         | NOCHANGE         |
| NOCHANGE         | DOWN             | NOCHANGE         | NOCHANGE         | DOWN             |
| NOCHANGE         | NOCHANGE         | DOWN             | DOWN             | DOWN             |
| UP               | NOCHANGE         | NOCHANGE         | DOWN             | NOCHANGE         |
| NOCHANGE         | NOCHANGE         | NOCHANGE         | NOCHANGE         | NOCHANGE         |
| DOWN             | DOWN             | NOCHANGE         | NOCHANGE         | DOWN             |
| NOCHANGE         | DOWN             | DOWN             | NOCHANGE         | DOWN             |
| NOCHANGE         | NOCHANGE         | NOCHANGE         | NOCHANGE         | NOCHANGE         |
| NOCHANGE         | NOCHANGE         | NOCHANGE         | NOCHANGE         | NOCHANGE         |
| DOWN             | DOWN             | DOWN             | DOWN             | DOWN             |
| NOCHANGE         | NOCHANGE         | NOCHANGE         | NOCHANGE         | NOCHANGE         |
| DOWN             | DOWN             | NOCHANGE         | DOWN             | DOWN             |
| UP               | UP               | NOCHANGE         | NOCHANGE         | NOCHANGE         |
| NOCHANGE         | NOCHANGE         | UP               | NOCHANGE         | UP               |
| DOWN             | NOCHANGE         | NOCHANGE         | NOCHANGE         | DOWN             |
| DOWN             | DOWN             | DOWN             | NOCHANGE         | DOWN             |
| DOWN             | DOWN             | DOWN             | DOWN             | DOWN             |
| DOWN             | NOCHANGE         | DOWN             | DOWN             | DOWN             |
| NOCHANGE         | NOCHANGE         | NOCHANGE         | NOCHANGE         | NOCHANGE         |
| NOCHANGE         | NOCHANGE         | NOCHANGE         | NOCHANGE         | UP               |
| DOWN             | NOCHANGE         | DOWN             | DOWN             | NOCHANGE         |
| NOCHANGE         | NOCHANGE         | NOCHANGE         | NOCHANGE         | NOCHANGE         |
| DOWN             | DOWN             | DOWN             | NOCHANGE         | DOWN             |

| TCGA-CJ-4904-01 | TCGA-CZ-4853-01 | TCGA-A3-3387-01 | TCGA-A3-3326-01 | TCGA-BP-4784-01 |
|-----------------|-----------------|-----------------|-----------------|-----------------|
| NOCHANGE        | NOCHANGE        | NOCHANGE        | NOCHANGE        | NOCHANGE        |
| NOCHANGE        | UP              | NOCHANGE        | UP              | NOCHANGE        |
| NOCHANGE        | NOCHANGE        | NOCHANGE        | NOCHANGE        | NOCHANGE        |
| DOWN            | DOWN            | DOWN            | DOWN            | DOWN            |
| NOCHANGE        | NOCHANGE        | UP              | NOCHANGE        | NOCHANGE        |
| NOCHANGE        | UP              | NOCHANGE        | UP              | NOCHANGE        |
| NOCHANGE        | DOWN            | NOCHANGE        | NOCHANGE        | DOWN            |
| NOCHANGE        | DOWN            | NOCHANGE        | NOCHANGE        | NOCHANGE        |
| NOCHANGE        | NOCHANGE        | NOCHANGE        | UP              | UP              |
| NOCHANGE        | NOCHANGE        | NOCHANGE        | NOCHANGE        | DOWN            |
| NOCHANGE        | DOWN            | DOWN            | DOWN            | NOCHANGE        |
| NOCHANGE        | DOWN            | UP              | NOCHANGE        | UP              |
| NOCHANGE        | NOCHANGE        | NOCHANGE        | NOCHANGE        | DOWN            |
| NOCHANGE        | DOWN            | NOCHANGE        | NOCHANGE        | NOCHANGE        |
| DOWN            | DOWN            | NOCHANGE        | DOWN            | NOCHANGE        |
| UP              | NOCHANGE        | NOCHANGE        | UP              | NOCHANGE        |
| UP              | NOCHANGE        | NOCHANGE        | UP              | NOCHANGE        |
| DOWN            | NOCHANGE        | DOWN            | DOWN            | DOWN            |
| NOCHANGE        | UP              | NOCHANGE        | UP              | NOCHANGE        |
| NOCHANGE        | NOCHANGE        | NOCHANGE        | DOWN            | DOWN            |
| NOCHANGE        | NOCHANGE        | UP              | UP              | NOCHANGE        |
| NOCHANGE        | UP              | NOCHANGE        | UP              | NOCHANGE        |
| NOCHANGE        | NOCHANGE        | UP              | NOCHANGE        | DOWN            |
| DOWN            | NOCHANGE        | DOWN            | DOWN            | DOWN            |
| NOCHANGE        | NOCHANGE        | DOWN            | DOWN            | DOWN            |
| NOCHANGE        | NOCHANGE        | NOCHANGE        | NOCHANGE        | NOCHANGE        |
| NOCHANGE        | NOCHANGE        | NOCHANGE        | NOCHANGE        | NOCHANGE        |
| NOCHANGE        | NOCHANGE        | NOCHANGE        | NOCHANGE        | NOCHANGE        |
| NOCHANGE        | NOCHANGE        | NOCHANGE        | NOCHANGE        | NOCHANGE        |
| NOCHANGE        | NOCHANGE        | NOCHANGE        | NOCHANGE        | NOCHANGE        |
| NOCHANGE        | DOWN            | NOCHANGE        | DOWN            | DOWN            |
| NOCHANGE        | NOCHANGE        | DOWN            | NOCHANGE        | NOCHANGE        |
| DOWN            | DOWN            | DOWN            | NOCHANGE        | NOCHANGE        |

| TCGA-BP-4766-01 | TCGA-CZ-5456-01 | TCGA-CZ-4857-01 | TCGA-B0-5400-01 | TCGA-BP-5010-01 |
|-----------------|-----------------|-----------------|-----------------|-----------------|
| NOCHANGE        | UP              | NOCHANGE        | NOCHANGE        | NOCHANGE        |
| UP              | UP              | UP              | UP              | UP              |
| NOCHANGE        | NOCHANGE        | NOCHANGE        | NOCHANGE        | NOCHANGE        |
| DOWN            | DOWN            | DOWN            | DOWN            | NOCHANGE        |
| NOCHANGE        | UP              | UP              | UP              | NOCHANGE        |
| UP              | UP              | NOCHANGE        | UP              | NOCHANGE        |
| DOWN            | DOWN            | DOWN            | DOWN            | NOCHANGE        |
| DOWN            | NOCHANGE        | NOCHANGE        | NOCHANGE        | NOCHANGE        |
| DOWN            | DOWN            | NOCHANGE        | UP              | NOCHANGE        |
| NOCHANGE        | NOCHANGE        | NOCHANGE        | NOCHANGE        | NOCHANGE        |
| DOWN            | DOWN            | DOWN            | NOCHANGE        | NOCHANGE        |
| NOCHANGE        | DOWN            | NOCHANGE        | DOWN            | NOCHANGE        |
| NOCHANGE        | DOWN            | DOWN            | NOCHANGE        | NOCHANGE        |
| NOCHANGE        | NOCHANGE        | NOCHANGE        | NOCHANGE        | DOWN            |
| DOWN            | DOWN            | DOWN            | NOCHANGE        | NOCHANGE        |
| UP              | NOCHANGE        | NOCHANGE        | NOCHANGE        | NOCHANGE        |
| UP              | NOCHANGE        | NOCHANGE        | DOWN            | NOCHANGE        |
| DOWN            | DOWN            | DOWN            | NOCHANGE        | DOWN            |
| NOCHANGE        | UP              | UP              | DOWN            | NOCHANGE        |
| DOWN            | UP              | DOWN            | DOWN            | DOWN            |
| UP              | UP              | UP              | NOCHANGE        | NOCHANGE        |
| NOCHANGE        | NOCHANGE        | NOCHANGE        | NOCHANGE        | NOCHANGE        |
| NOCHANGE        | UP              | NOCHANGE        | NOCHANGE        | NOCHANGE        |
| NOCHANGE        | DOWN            | DOWN            | NOCHANGE        | DOWN            |
| NOCHANGE        | DOWN            | DOWN            | DOWN            | DOWN            |
| NOCHANGE        | UP              | DOWN            | NOCHANGE        | DOWN            |
| NOCHANGE        | NOCHANGE        | NOCHANGE        | NOCHANGE        | NOCHANGE        |
| NOCHANGE        | NOCHANGE        | NOCHANGE        | NOCHANGE        | NOCHANGE        |
| NOCHANGE        | NOCHANGE        | DOWN            | DOWN            | DOWN            |
| NOCHANGE        | NOCHANGE        | NOCHANGE        | NOCHANGE        | NOCHANGE        |
| NOCHANGE        | UP              | DOWN            | NOCHANGE        | DOWN            |



| TCGA-CJ-4644-01 | TCGA-CJ-6033-01 | TCGA-EU-5907-01 | TCGA-B4-5836-01 | TCGA-A3-3323-01 |
|-----------------|-----------------|-----------------|-----------------|-----------------|
| NOCHANGE        | NOCHANGE        | NOCHANGE        | NOCHANGE        | NOCHANGE        |
| UP              | UP              | UP              | UP              | UP              |
| NOCHANGE        | NOCHANGE        | NOCHANGE        | NOCHANGE        | NOCHANGE        |
| DOWN            | DOWN            | DOWN            | DOWN            | DOWN            |
| NOCHANGE        | NOCHANGE        | NOCHANGE        | UP              | UP              |
| UP              | NOCHANGE        | NOCHANGE        | NOCHANGE        | NOCHANGE        |
| DOWN            | DOWN            | DOWN            | DOWN            | NOCHANGE        |
| DOWN            | NOCHANGE        | NOCHANGE        | NOCHANGE        | NOCHANGE        |
| DOWN            | NOCHANGE        | NOCHANGE        | NOCHANGE        | NOCHANGE        |
| NOCHANGE        | NOCHANGE        | NOCHANGE        | NOCHANGE        | NOCHANGE        |
| NOCHANGE        | NOCHANGE        | NOCHANGE        | NOCHANGE        | NOCHANGE        |
| DOWN            | NOCHANGE        | DOWN            | NOCHANGE        | NOCHANGE        |
| NOCHANGE        | NOCHANGE        | NOCHANGE        | NOCHANGE        | NOCHANGE        |
| NOCHANGE        | DOWN            | NOCHANGE        | NOCHANGE        | NOCHANGE        |
| DOWN            | DOWN            | DOWN            | DOWN            | DOWN            |
| NOCHANGE        | NOCHANGE        | NOCHANGE        | NOCHANGE        | NOCHANGE        |
| NOCHANGE        | NOCHANGE        | NOCHANGE        | UP              | NOCHANGE        |
| NOCHANGE        | NOCHANGE        | NOCHANGE        | NOCHANGE        | DOWN            |
| NOCHANGE        | NOCHANGE        | NOCHANGE        | NOCHANGE        | UP              |
| NOCHANGE        | NOCHANGE        | NOCHANGE        | NOCHANGE        | DOWN            |
| UP              | NOCHANGE        | NOCHANGE        | NOCHANGE        | UP              |
| NOCHANGE        | NOCHANGE        | UP              | NOCHANGE        | UP              |
| NOCHANGE        | NOCHANGE        | NOCHANGE        | NOCHANGE        | NOCHANGE        |
| NOCHANGE        | NOCHANGE        | NOCHANGE        | DOWN            | DOWN            |
| NOCHANGE        | DOWN            | DOWN            | NOCHANGE        | DOWN            |
| NOCHANGE        | NOCHANGE        | NOCHANGE        | NOCHANGE        | DOWN            |
| NOCHANGE        | NOCHANGE        | NOCHANGE        | NOCHANGE        | NOCHANGE        |
| NOCHANGE        | NOCHANGE        | NOCHANGE        | NOCHANGE        | NOCHANGE        |
| NOCHANGE        | NOCHANGE        | NOCHANGE        | NOCHANGE        | DOWN            |
| NOCHANGE        | NOCHANGE        | NOCHANGE        | NOCHANGE        | DOWN            |
| DOWN            | NOCHANGE        | DOWN            | NOCHANGE        | DOWN            |
| NOCHANGE        | DOWN            | NOCHANGE        | NOCHANGE        | NOCHANGE        |

| TCGA-BP-4353-01. | TCGA-B0-5077-01. | TCGA-CZ-5984-01 | TCGA-B8-A54G-01 | TCGA-B0-4713-01. |
|------------------|------------------|-----------------|-----------------|------------------|
| NOCHANGE         | NOCHANGE         | UP              | NOCHANGE        | UP               |
| UP               | UP               | UP              | UP              | UP               |
| NOCHANGE         | NOCHANGE         | NOCHANGE        | NOCHANGE        | NOCHANGE         |
| DOWN             | DOWN             | DOWN            | DOWN            | DOWN             |
| NOCHANGE         | NOCHANGE         | UP              | NOCHANGE        | UP               |
| NOCHANGE         | UP               | NOCHANGE        | NOCHANGE        | UP               |
| DOWN             | DOWN             | NOCHANGE        | DOWN            | DOWN             |
| NOCHANGE         | NOCHANGE         | NOCHANGE        | NOCHANGE        | NOCHANGE         |
| NOCHANGE         | NOCHANGE         | UP              | NOCHANGE        | UP               |
| DOWN             | NOCHANGE         | NOCHANGE        | NOCHANGE        | NOCHANGE         |
| NOCHANGE         | DOWN             | NOCHANGE        | NOCHANGE        | UP               |
| NOCHANGE         | NOCHANGE         | NOCHANGE        | DOWN            | NOCHANGE         |
| NOCHANGE         | NOCHANGE         | NOCHANGE        | NOCHANGE        | NOCHANGE         |
| NOCHANGE         | NOCHANGE         | NOCHANGE        | NOCHANGE        | NOCHANGE         |
| DOWN             | DOWN             | DOWN            | NOCHANGE        | DOWN             |
| UP               | NOCHANGE         | NOCHANGE        | NOCHANGE        | NOCHANGE         |
| NOCHANGE         | NOCHANGE         | NOCHANGE        | UP              | DOWN             |
| DOWN             | DOWN             | NOCHANGE        | NOCHANGE        | NOCHANGE         |
| NOCHANGE         | NOCHANGE         | UP              | UP              | NOCHANGE         |
| NOCHANGE         | DOWN             | UP              | NOCHANGE        | NOCHANGE         |
| UP               | NOCHANGE         | UP              | UP              | NOCHANGE         |
| NOCHANGE         | UP               | UP              | NOCHANGE        | NOCHANGE         |
| NOCHANGE         | DOWN             | NOCHANGE        | DOWN            | NOCHANGE         |
| DOWN             | DOWN             | NOCHANGE        | NOCHANGE        | NOCHANGE         |
| DOWN             | DOWN             | DOWN            | DOWN            | NOCHANGE         |
| NOCHANGE         | NOCHANGE         | NOCHANGE        | DOWN            | NOCHANGE         |
| NOCHANGE         | NOCHANGE         | NOCHANGE        | NOCHANGE        | NOCHANGE         |
| NOCHANGE         | NOCHANGE         | NOCHANGE        | NOCHANGE        | NOCHANGE         |
| NOCHANGE         | NOCHANGE         | NOCHANGE        | NOCHANGE        | NOCHANGE         |
| NOCHANGE         | DOWN             | NOCHANGE        | NOCHANGE        | DOWN             |
| NOCHANGE         | NOCHANGE         | DOWN            | DOWN            | DOWN             |
| DOWN             | DOWN             | DOWN            | NOCHANGE        | NOCHANGE         |

| TCGA-CZ-5463-01 | TCGA-6D-AA2E-0 | TCGA-CJ-6032-01 | TCGA-BP-4801-01 | TCGA-EU-5904-01 |
|-----------------|----------------|-----------------|-----------------|-----------------|
| NOCHANGE        | NOCHANGE       | NOCHANGE        | NOCHANGE        | NOCHANGE        |
| UP              | NOCHANGE       | UP              | UP              | UP              |
| NOCHANGE        | NOCHANGE       | NOCHANGE        | NOCHANGE        | NOCHANGE        |
| NOCHANGE        | DOWN           | DOWN            | DOWN            | NOCHANGE        |
| NOCHANGE        | NOCHANGE       | NOCHANGE        | NOCHANGE        | NOCHANGE        |
| NOCHANGE        | UP             | UP              | UP              | NOCHANGE        |
| DOWN            | DOWN           | DOWN            | NOCHANGE        | NOCHANGE        |
| NOCHANGE        | NOCHANGE       | DOWN            | NOCHANGE        | NOCHANGE        |
| DOWN            | NOCHANGE       | NOCHANGE        | NOCHANGE        | DOWN            |
| NOCHANGE        | NOCHANGE       | NOCHANGE        | NOCHANGE        | NOCHANGE        |
| DOWN            | NOCHANGE       | NOCHANGE        | NOCHANGE        | NOCHANGE        |
| DOWN            | NOCHANGE       | DOWN            | DOWN            | NOCHANGE        |
| NOCHANGE        | NOCHANGE       | NOCHANGE        | DOWN            | DOWN            |
| NOCHANGE        | NOCHANGE       | NOCHANGE        | NOCHANGE        | NOCHANGE        |
| NOCHANGE        | NOCHANGE       | NOCHANGE        | NOCHANGE        | NOCHANGE        |
| DOWN            | NOCHANGE       | DOWN            | NOCHANGE        | DOWN            |
| UP              | NOCHANGE       | NOCHANGE        | UP              | NOCHANGE        |
| NOCHANGE        | NOCHANGE       | UP              | NOCHANGE        | NOCHANGE        |
| NOCHANGE        | NOCHANGE       | DOWN            | NOCHANGE        | DOWN            |
| NOCHANGE        | DOWN           | NOCHANGE        | NOCHANGE        | NOCHANGE        |
| NOCHANGE        | NOCHANGE       | NOCHANGE        | DOWN            | DOWN            |
| UP              | NOCHANGE       | NOCHANGE        | UP              | NOCHANGE        |
| NOCHANGE        | NOCHANGE       | NOCHANGE        | NOCHANGE        | UP              |
| NOCHANGE        | NOCHANGE       | NOCHANGE        | UP              | DOWN            |
| NOCHANGE        | NOCHANGE       | DOWN            | NOCHANGE        | DOWN            |
| NOCHANGE        | NOCHANGE       | NOCHANGE        | DOWN            | NOCHANGE        |
| NOCHANGE        | DOWN           | NOCHANGE        | UP              | NOCHANGE        |
| NOCHANGE        | NOCHANGE       | NOCHANGE        | NOCHANGE        | NOCHANGE        |
| NOCHANGE        | NOCHANGE       | NOCHANGE        | NOCHANGE        | NOCHANGE        |
| NOCHANGE        | NOCHANGE       | NOCHANGE        | NOCHANGE        | UP              |
| NOCHANGE        | NOCHANGE       | UP              | NOCHANGE        | NOCHANGE        |
| DOWN            | NOCHANGE       | DOWN            | NOCHANGE        | UP              |
| DOWN            | NOCHANGE       | NOCHANGE        | NOCHANGE        | DOWN            |

| TCGA-B8-5158-01 | TCGA-BP-4969-01 | TCGA-B8-5546-01 | TCGA-B4-5844-01 | TCGA-CZ-5452-01 |
|-----------------|-----------------|-----------------|-----------------|-----------------|
| NOCHANGE        | NOCHANGE        | NOCHANGE        | NOCHANGE        | NOCHANGE        |
| UP              | UP              | UP              | UP              | UP              |
| NOCHANGE        | NOCHANGE        | NOCHANGE        | NOCHANGE        | NOCHANGE        |
| DOWN            | NOCHANGE        | NOCHANGE        | DOWN            | NOCHANGE        |
| UP              | DOWN            | NOCHANGE        | NOCHANGE        | NOCHANGE        |
| UP              | NOCHANGE        | NOCHANGE        | UP              | NOCHANGE        |
| DOWN            | NOCHANGE        | DOWN            | DOWN            | DOWN            |
| NOCHANGE        | NOCHANGE        | NOCHANGE        | NOCHANGE        | DOWN            |
| UP              | NOCHANGE        | DOWN            | DOWN            | NOCHANGE        |
| NOCHANGE        | NOCHANGE        | NOCHANGE        | NOCHANGE        | NOCHANGE        |
| NOCHANGE        | NOCHANGE        | NOCHANGE        | NOCHANGE        | NOCHANGE        |
| NOCHANGE        | UP              | DOWN            | NOCHANGE        | NOCHANGE        |
| NOCHANGE        | NOCHANGE        | NOCHANGE        | NOCHANGE        | NOCHANGE        |
| NOCHANGE        | DOWN            | NOCHANGE        | NOCHANGE        | NOCHANGE        |
| DOWN            | DOWN            | DOWN            | DOWN            | DOWN            |
| NOCHANGE        | NOCHANGE        | UP              | UP              | NOCHANGE        |
| NOCHANGE        | DOWN            | NOCHANGE        | UP              | UP              |
| DOWN            | NOCHANGE        | NOCHANGE        | DOWN            | NOCHANGE        |
| NOCHANGE        | NOCHANGE        | NOCHANGE        | NOCHANGE        | NOCHANGE        |
| UP              | DOWN            | NOCHANGE        | DOWN            | DOWN            |
| UP              | NOCHANGE        | NOCHANGE        | NOCHANGE        | UP              |
| NOCHANGE        | NOCHANGE        | NOCHANGE        | NOCHANGE        | NOCHANGE        |
| NOCHANGE        | DOWN            | NOCHANGE        | NOCHANGE        | DOWN            |
| DOWN            | DOWN            | NOCHANGE        | DOWN            | NOCHANGE        |
| DOWN            | DOWN            | NOCHANGE        | NOCHANGE        | NOCHANGE        |
| NOCHANGE        | NOCHANGE        | DOWN            | NOCHANGE        | DOWN            |
| NOCHANGE        | NOCHANGE        | NOCHANGE        | NOCHANGE        | NOCHANGE        |
| NOCHANGE        | NOCHANGE        | DOWN            | NOCHANGE        | NOCHANGE        |
| NOCHANGE        | DOWN            | NOCHANGE        | NOCHANGE        | DOWN            |
| NOCHANGE        | NOCHANGE        | DOWN            | DOWN            | NOCHANGE        |
| NOCHANGE        | DOWN            | UP              | DOWN            | NOCHANGE        |

| TCGA-BP-4991-01 | TCGA-A3-3316-01 | TCGA-B8-A54E-01 | TCGA-BP-5170-01 | TCGA-A3-A6NI-01 |
|-----------------|-----------------|-----------------|-----------------|-----------------|
| NOCHANGE        | UP              | NOCHANGE        | NOCHANGE        | NOCHANGE        |
| UP              | UP              | UP              | UP              | UP              |
| NOCHANGE        | NOCHANGE        | NOCHANGE        | NOCHANGE        | NOCHANGE        |
| NOCHANGE        | DOWN            | UP              | DOWN            | DOWN            |
| NOCHANGE        | NOCHANGE        | NOCHANGE        | NOCHANGE        | NOCHANGE        |
| NOCHANGE        | NOCHANGE        | UP              | NOCHANGE        | NOCHANGE        |
| DOWN            | NOCHANGE        | NOCHANGE        | DOWN            | NOCHANGE        |
| DOWN            | NOCHANGE        | NOCHANGE        | NOCHANGE        | NOCHANGE        |
| NOCHANGE        | NOCHANGE        | DOWN            | NOCHANGE        | DOWN            |
| NOCHANGE        | NOCHANGE        | NOCHANGE        | DOWN            | NOCHANGE        |
| NOCHANGE        | NOCHANGE        | NOCHANGE        | NOCHANGE        | NOCHANGE        |
| NOCHANGE        | UP              | UP              | NOCHANGE        | DOWN            |
| NOCHANGE        | NOCHANGE        | NOCHANGE        | NOCHANGE        | NOCHANGE        |
| NOCHANGE        | NOCHANGE        | NOCHANGE        | DOWN            | NOCHANGE        |
| DOWN            | DOWN            | DOWN            | DOWN            | DOWN            |
| NOCHANGE        | NOCHANGE        | UP              | NOCHANGE        | NOCHANGE        |
| UP              | NOCHANGE        | NOCHANGE        | NOCHANGE        | NOCHANGE        |
| DOWN            | DOWN            | UP              | DOWN            | DOWN            |
| UP              | NOCHANGE        | DOWN            | NOCHANGE        | NOCHANGE        |
| DOWN            | DOWN            | NOCHANGE        | NOCHANGE        | NOCHANGE        |
| NOCHANGE        | UP              | NOCHANGE        | NOCHANGE        | NOCHANGE        |
| UP              | UP              | DOWN            | NOCHANGE        | UP              |
| NOCHANGE        | NOCHANGE        | NOCHANGE        | NOCHANGE        | NOCHANGE        |
| DOWN            | DOWN            | DOWN            | NOCHANGE        | NOCHANGE        |
| DOWN            | DOWN            | NOCHANGE        | DOWN            | DOWN            |
| NOCHANGE        | DOWN            | UP              | NOCHANGE        | NOCHANGE        |
| NOCHANGE        | NOCHANGE        | NOCHANGE        | NOCHANGE        | NOCHANGE        |
| NOCHANGE        | NOCHANGE        | NOCHANGE        | NOCHANGE        | NOCHANGE        |
| NOCHANGE        | NOCHANGE        | NOCHANGE        | NOCHANGE        | DOWN            |
| NOCHANGE        | NOCHANGE        | NOCHANGE        | NOCHANGE        | NOCHANGE        |
| DOWN            | UP              | UP              | DOWN            | DOWN            |

| TCGA-B0-5711-01 | TCGA-CZ-5451-01 | TCGA-BP-4340-01 | TCGA-BP-5180-01 | TCGA-CJ-4639-01 |
|-----------------|-----------------|-----------------|-----------------|-----------------|
| NOCHANGE        | NOCHANGE        | NOCHANGE        | NOCHANGE        | NOCHANGE        |
| UP              | UP              | UP              | UP              | UP              |
| NOCHANGE        | NOCHANGE        | NOCHANGE        | NOCHANGE        | NOCHANGE        |
| DOWN            | DOWN            | NOCHANGE        | DOWN            | DOWN            |
| NOCHANGE        | NOCHANGE        | NOCHANGE        | NOCHANGE        | NOCHANGE        |
| NOCHANGE        | NOCHANGE        | NOCHANGE        | NOCHANGE        | NOCHANGE        |
| DOWN            | DOWN            | DOWN            | DOWN            | NOCHANGE        |
| DOWN            | NOCHANGE        | DOWN            | NOCHANGE        | DOWN            |
| DOWN            | UP              | NOCHANGE        | NOCHANGE        | NOCHANGE        |
| NOCHANGE        | NOCHANGE        | NOCHANGE        | NOCHANGE        | NOCHANGE        |
| NOCHANGE        | NOCHANGE        | NOCHANGE        | NOCHANGE        | NOCHANGE        |
| DOWN            | DOWN            | NOCHANGE        | DOWN            | NOCHANGE        |
| NOCHANGE        | NOCHANGE        | NOCHANGE        | NOCHANGE        | NOCHANGE        |
| NOCHANGE        | NOCHANGE        | NOCHANGE        | DOWN            | NOCHANGE        |
| DOWN            | DOWN            | DOWN            | DOWN            | DOWN            |
| NOCHANGE        | NOCHANGE        | UP              | NOCHANGE        | UP              |
| NOCHANGE        | NOCHANGE        | NOCHANGE        | NOCHANGE        | NOCHANGE        |
| NOCHANGE        | NOCHANGE        | DOWN            | NOCHANGE        | DOWN            |
| UP              | NOCHANGE        | UP              | NOCHANGE        | UP              |
| NOCHANGE        | NOCHANGE        | DOWN            | NOCHANGE        | DOWN            |
| NOCHANGE        | NOCHANGE        | NOCHANGE        | NOCHANGE        | NOCHANGE        |
| NOCHANGE        | UP              | UP              | NOCHANGE        | NOCHANGE        |
| NOCHANGE        | NOCHANGE        | DOWN            | NOCHANGE        | NOCHANGE        |
| DOWN            | NOCHANGE        | NOCHANGE        | NOCHANGE        | DOWN            |
| DOWN            | NOCHANGE        | NOCHANGE        | DOWN            | NOCHANGE        |
| NOCHANGE        | NOCHANGE        | DOWN            | NOCHANGE        | DOWN            |
| NOCHANGE        | NOCHANGE        | NOCHANGE        | NOCHANGE        | NOCHANGE        |
| NOCHANGE        | NOCHANGE        | NOCHANGE        | NOCHANGE        | NOCHANGE        |
| NOCHANGE        | NOCHANGE        | NOCHANGE        | NOCHANGE        | NOCHANGE        |
| NOCHANGE        | NOCHANGE        | NOCHANGE        | NOCHANGE        | NOCHANGE        |
| NOCHANGE        | NOCHANGE        | NOCHANGE        | NOCHANGE        | NOCHANGE        |
| NOCHANGE        | DOWN            | DOWN            | NOCHANGE        | DOWN            |

| TCGA-B0-4821-01 | TCGA-CZ-4860-01 | TCGA-B0-4813-01 | TCGA-B8-4619-01 | TCGA-CJ-4892-01 |
|-----------------|-----------------|-----------------|-----------------|-----------------|
| NOCHANGE        | UP              | NOCHANGE        | NOCHANGE        | NOCHANGE        |
| UP              | UP              | NOCHANGE        | NOCHANGE        | UP              |
| NOCHANGE        | NOCHANGE        | NOCHANGE        | DOWN            | NOCHANGE        |
| DOWN            | DOWN            | DOWN            | NOCHANGE        | DOWN            |
| NOCHANGE        | UP              | NOCHANGE        | NOCHANGE        | NOCHANGE        |
| NOCHANGE        | UP              | DOWN            | NOCHANGE        | NOCHANGE        |
| DOWN            | DOWN            | NOCHANGE        | NOCHANGE        | NOCHANGE        |
| UP              | NOCHANGE        | NOCHANGE        | NOCHANGE        | NOCHANGE        |
| UP              | NOCHANGE        | NOCHANGE        | NOCHANGE        | NOCHANGE        |
| NOCHANGE        | NOCHANGE        | NOCHANGE        | NOCHANGE        | NOCHANGE        |
| NOCHANGE        | DOWN            | UP              | DOWN            | NOCHANGE        |
| NOCHANGE        | DOWN            | NOCHANGE        | NOCHANGE        | DOWN            |
| NOCHANGE        | NOCHANGE        | NOCHANGE        | NOCHANGE        | NOCHANGE        |
| NOCHANGE        | UP              | DOWN            | NOCHANGE        | NOCHANGE        |
| DOWN            | DOWN            | DOWN            | DOWN            | NOCHANGE        |
| NOCHANGE        | NOCHANGE        | DOWN            | UP              | NOCHANGE        |
| DOWN            | NOCHANGE        | DOWN            | NOCHANGE        | NOCHANGE        |
| DOWN            | NOCHANGE        | NOCHANGE        | DOWN            | NOCHANGE        |
| NOCHANGE        | NOCHANGE        | NOCHANGE        | NOCHANGE        | NOCHANGE        |
| DOWN            | DOWN            | DOWN            | DOWN            | DOWN            |
| NOCHANGE        | UP              | NOCHANGE        | NOCHANGE        | NOCHANGE        |
| NOCHANGE        | NOCHANGE        | UP              | NOCHANGE        | UP              |
| DOWN            | UP              | DOWN            | NOCHANGE        | DOWN            |
| NOCHANGE        | NOCHANGE        | NOCHANGE        | NOCHANGE        | NOCHANGE        |
| DOWN            | DOWN            | DOWN            | NOCHANGE        | NOCHANGE        |
| NOCHANGE        | UP              | DOWN            | DOWN            | DOWN            |
| NOCHANGE        | NOCHANGE        | NOCHANGE        | NOCHANGE        | NOCHANGE        |
| NOCHANGE        | NOCHANGE        | NOCHANGE        | NOCHANGE        | NOCHANGE        |
| DOWN            | NOCHANGE        | DOWN            | NOCHANGE        | DOWN            |
| NOCHANGE        | DOWN            | NOCHANGE        | NOCHANGE        | NOCHANGE        |
| NOCHANGE        | NOCHANGE        | DOWN            | NOCHANGE        | DOWN            |

|                 |                 |                 |                 |                 |
|-----------------|-----------------|-----------------|-----------------|-----------------|
| TCGA-CJ-4916-01 | TCGA-BP-4964-01 | TCGA-B0-5712-01 | TCGA-BP-4965-01 | TCGA-BP-5199-01 |
| NOCHANGE        | NOCHANGE        | UP              | NOCHANGE        | NOCHANGE        |
| UP              | UP              | UP              | UP              | UP              |
| NOCHANGE        | NOCHANGE        | NOCHANGE        | NOCHANGE        | NOCHANGE        |
| DOWN            | DOWN            | DOWN            | DOWN            | DOWN            |
| NOCHANGE        | NOCHANGE        | NOCHANGE        | NOCHANGE        | NOCHANGE        |
| NOCHANGE        | NOCHANGE        | UP              | NOCHANGE        | DOWN            |
| NOCHANGE        | NOCHANGE        | DOWN            | DOWN            | DOWN            |
| DOWN            | NOCHANGE        | NOCHANGE        | DOWN            | NOCHANGE        |
| DOWN            | UP              | UP              | NOCHANGE        | NOCHANGE        |
| NOCHANGE        | NOCHANGE        | NOCHANGE        | NOCHANGE        | NOCHANGE        |
| NOCHANGE        | NOCHANGE        | NOCHANGE        | NOCHANGE        | NOCHANGE        |
| NOCHANGE        | NOCHANGE        | NOCHANGE        | NOCHANGE        | NOCHANGE        |
| NOCHANGE        | DOWN            | DOWN            | NOCHANGE        | NOCHANGE        |
| NOCHANGE        | NOCHANGE        | NOCHANGE        | NOCHANGE        | DOWN            |
| DOWN            | NOCHANGE        | NOCHANGE        | NOCHANGE        | NOCHANGE        |
| DOWN            | DOWN            | NOCHANGE        | DOWN            | NOCHANGE        |
| NOCHANGE        | NOCHANGE        | NOCHANGE        | NOCHANGE        | NOCHANGE        |
| NOCHANGE        | NOCHANGE        | NOCHANGE        | NOCHANGE        | NOCHANGE        |
| NOCHANGE        | NOCHANGE        | NOCHANGE        | NOCHANGE        | NOCHANGE        |
| NOCHANGE        | NOCHANGE        | NOCHANGE        | NOCHANGE        | NOCHANGE        |
| NOCHANGE        | DOWN            | NOCHANGE        | DOWN            | NOCHANGE        |
| NOCHANGE        | UP              | NOCHANGE        | UP              | NOCHANGE        |
| DOWN            | DOWN            | DOWN            | NOCHANGE        | DOWN            |
| NOCHANGE        | NOCHANGE        | NOCHANGE        | UP              | NOCHANGE        |
| NOCHANGE        | NOCHANGE        | NOCHANGE        | NOCHANGE        | UP              |
| DOWN            | NOCHANGE        | NOCHANGE        | NOCHANGE        | DOWN            |
| DOWN            | NOCHANGE        | NOCHANGE        | DOWN            | DOWN            |
| DOWN            | DOWN            | NOCHANGE        | NOCHANGE        | DOWN            |
| DOWN            | NOCHANGE        | NOCHANGE        | NOCHANGE        | NOCHANGE        |
| NOCHANGE        | NOCHANGE        | NOCHANGE        | NOCHANGE        | NOCHANGE        |
| NOCHANGE        | NOCHANGE        | NOCHANGE        | NOCHANGE        | NOCHANGE        |
| NOCHANGE        | NOCHANGE        | NOCHANGE        | NOCHANGE        | NOCHANGE        |
| NOCHANGE        | NOCHANGE        | NOCHANGE        | NOCHANGE        | DOWN            |
| NOCHANGE        | NOCHANGE        | NOCHANGE        | NOCHANGE        | NOCHANGE        |
| DOWN            | NOCHANGE        | DOWN            | DOWN            | DOWN            |



| TCGA-BP-4973-01. | TCGA-B2-5635-01. | TCGA-B0-4844-01. | TCGA-G6-A8L7-01 | TCGA-B0-5088-01. |
|------------------|------------------|------------------|-----------------|------------------|
| NOCHANGE         | NOCHANGE         | NOCHANGE         | NOCHANGE        | NOCHANGE         |
| UP               | UP               | UP               | UP              | UP               |
| NOCHANGE         | NOCHANGE         | NOCHANGE         | NOCHANGE        | NOCHANGE         |
| DOWN             | DOWN             | DOWN             | DOWN            | DOWN             |
| UP               | UP               | UP               | NOCHANGE        | NOCHANGE         |
| NOCHANGE         | NOCHANGE         | NOCHANGE         | NOCHANGE        | NOCHANGE         |
| DOWN             | DOWN             | DOWN             | DOWN            | NOCHANGE         |
| NOCHANGE         | NOCHANGE         | UP               | UP              | NOCHANGE         |
| NOCHANGE         | NOCHANGE         | NOCHANGE         | NOCHANGE        | NOCHANGE         |
| NOCHANGE         | NOCHANGE         | NOCHANGE         | NOCHANGE        | NOCHANGE         |
| DOWN             | NOCHANGE         | UP               | UP              | NOCHANGE         |
| DOWN             | DOWN             | NOCHANGE         | DOWN            | NOCHANGE         |
| NOCHANGE         | NOCHANGE         | NOCHANGE         | DOWN            | NOCHANGE         |
| NOCHANGE         | NOCHANGE         | NOCHANGE         | DOWN            | NOCHANGE         |
| DOWN             | DOWN             | DOWN             | DOWN            | DOWN             |
| NOCHANGE         | NOCHANGE         | DOWN             | DOWN            | NOCHANGE         |
| NOCHANGE         | UP               | DOWN             | DOWN            | NOCHANGE         |
| DOWN             | NOCHANGE         | NOCHANGE         | NOCHANGE        | DOWN             |
| NOCHANGE         | UP               | NOCHANGE         | DOWN            | NOCHANGE         |
| NOCHANGE         | NOCHANGE         | NOCHANGE         | NOCHANGE        | DOWN             |
| NOCHANGE         | UP               | NOCHANGE         | NOCHANGE        | NOCHANGE         |
| UP               | NOCHANGE         | UP               | DOWN            | NOCHANGE         |
| DOWN             | NOCHANGE         | DOWN             | DOWN            | DOWN             |
| DOWN             | DOWN             | DOWN             | NOCHANGE        | NOCHANGE         |
| DOWN             | NOCHANGE         | DOWN             | DOWN            | DOWN             |
| DOWN             | NOCHANGE         | NOCHANGE         | UP              | NOCHANGE         |
| NOCHANGE         | NOCHANGE         | NOCHANGE         | NOCHANGE        | NOCHANGE         |
| NOCHANGE         | NOCHANGE         | NOCHANGE         | NOCHANGE        | NOCHANGE         |
| NOCHANGE         | NOCHANGE         | NOCHANGE         | NOCHANGE        | NOCHANGE         |
| NOCHANGE         | NOCHANGE         | DOWN             | DOWN            | DOWN             |
| NOCHANGE         | DOWN             | NOCHANGE         | NOCHANGE        | NOCHANGE         |
| DOWN             | NOCHANGE         | NOCHANGE         | UP              | NOCHANGE         |

| TCGA-A3-3324-01 | TCGA-BP-4968-01 | TCGA-BP-4352-01 | TCGA-CJ-4872-01 | TCGA-DV-A4VZ-0 |
|-----------------|-----------------|-----------------|-----------------|----------------|
| NOCHANGE        | NOCHANGE        | NOCHANGE        | NOCHANGE        | NOCHANGE       |
| UP              | UP              | NOCHANGE        | UP              | NOCHANGE       |
| NOCHANGE        | NOCHANGE        | DOWN            | NOCHANGE        | NOCHANGE       |
| DOWN            | DOWN            | DOWN            | DOWN            | DOWN           |
| UP              | NOCHANGE        | NOCHANGE        | NOCHANGE        | NOCHANGE       |
| NOCHANGE        | NOCHANGE        | NOCHANGE        | NOCHANGE        | DOWN           |
| DOWN            | DOWN            | DOWN            | NOCHANGE        | DOWN           |
| NOCHANGE        | NOCHANGE        | UP              | NOCHANGE        | NOCHANGE       |
| NOCHANGE        | NOCHANGE        | UP              | DOWN            | UP             |
| NOCHANGE        | NOCHANGE        | NOCHANGE        | DOWN            | NOCHANGE       |
| DOWN            | NOCHANGE        | NOCHANGE        | NOCHANGE        | DOWN           |
| DOWN            | DOWN            | UP              | NOCHANGE        | UP             |
| NOCHANGE        | NOCHANGE        | DOWN            | NOCHANGE        | DOWN           |
| NOCHANGE        | DOWN            | DOWN            | NOCHANGE        | DOWN           |
| DOWN            | DOWN            | DOWN            | NOCHANGE        | NOCHANGE       |
| UP              | NOCHANGE        | NOCHANGE        | NOCHANGE        | DOWN           |
| NOCHANGE        | NOCHANGE        | DOWN            | NOCHANGE        | NOCHANGE       |
| DOWN            | NOCHANGE        | NOCHANGE        | DOWN            | NOCHANGE       |
| NOCHANGE        | NOCHANGE        | NOCHANGE        | NOCHANGE        | NOCHANGE       |
| DOWN            | DOWN            | DOWN            | DOWN            | DOWN           |
| UP              | NOCHANGE        | NOCHANGE        | NOCHANGE        | DOWN           |
| NOCHANGE        | NOCHANGE        | NOCHANGE        | NOCHANGE        | NOCHANGE       |
| NOCHANGE        | DOWN            | UP              | NOCHANGE        | DOWN           |
| DOWN            | NOCHANGE        | NOCHANGE        | DOWN            | DOWN           |
| DOWN            | DOWN            | DOWN            | DOWN            | DOWN           |
| NOCHANGE        | NOCHANGE        | UP              | NOCHANGE        | DOWN           |
| NOCHANGE        | NOCHANGE        | NOCHANGE        | NOCHANGE        | NOCHANGE       |
| NOCHANGE        | NOCHANGE        | NOCHANGE        | NOCHANGE        | NOCHANGE       |
| DOWN            | DOWN            | DOWN            | NOCHANGE        | DOWN           |
| NOCHANGE        | NOCHANGE        | DOWN            | NOCHANGE        | DOWN           |
| DOWN            | DOWN            | DOWN            | NOCHANGE        | DOWN           |

| TCGA-BP-5006-01. | TCGA-BP-5009-01. | TCGA-B0-4699-01. | TCGA-B0-4834-01. | TCGA-BP-4998-01. |
|------------------|------------------|------------------|------------------|------------------|
| NOCHANGE         | NOCHANGE         | DOWN             | DOWN             | NOCHANGE         |
| UP               | UP               | UP               | NOCHANGE         | UP               |
| NOCHANGE         | NOCHANGE         | NOCHANGE         | NOCHANGE         | NOCHANGE         |
| DOWN             | DOWN             | DOWN             | DOWN             | DOWN             |
| NOCHANGE         | UP               | NOCHANGE         | NOCHANGE         | UP               |
| NOCHANGE         | NOCHANGE         | DOWN             | NOCHANGE         | NOCHANGE         |
| DOWN             | DOWN             | NOCHANGE         | NOCHANGE         | DOWN             |
| NOCHANGE         | NOCHANGE         | NOCHANGE         | NOCHANGE         | DOWN             |
| DOWN             | NOCHANGE         | NOCHANGE         | NOCHANGE         | UP               |
| NOCHANGE         | NOCHANGE         | NOCHANGE         | NOCHANGE         | NOCHANGE         |
| NOCHANGE         | DOWN             | NOCHANGE         | DOWN             | DOWN             |
| NOCHANGE         | DOWN             | UP               | UP               | NOCHANGE         |
| NOCHANGE         | NOCHANGE         | DOWN             | NOCHANGE         | NOCHANGE         |
| NOCHANGE         | DOWN             | NOCHANGE         | DOWN             | NOCHANGE         |
| DOWN             | DOWN             | DOWN             | DOWN             | NOCHANGE         |
| NOCHANGE         | NOCHANGE         | NOCHANGE         | UP               | NOCHANGE         |
| UP               | NOCHANGE         | NOCHANGE         | DOWN             | NOCHANGE         |
| DOWN             | DOWN             | DOWN             | DOWN             | DOWN             |
| NOCHANGE         | NOCHANGE         | NOCHANGE         | NOCHANGE         | UP               |
| DOWN             | DOWN             | DOWN             | DOWN             | NOCHANGE         |
| NOCHANGE         | NOCHANGE         | UP               | NOCHANGE         | UP               |
| NOCHANGE         | NOCHANGE         | NOCHANGE         | NOCHANGE         | UP               |
| NOCHANGE         | NOCHANGE         | NOCHANGE         | NOCHANGE         | NOCHANGE         |
| NOCHANGE         | NOCHANGE         | NOCHANGE         | NOCHANGE         | NOCHANGE         |
| NOCHANGE         | DOWN             | NOCHANGE         | NOCHANGE         | DOWN             |
| NOCHANGE         | DOWN             | NOCHANGE         | NOCHANGE         | DOWN             |
| NOCHANGE         | DOWN             | NOCHANGE         | DOWN             | NOCHANGE         |
| NOCHANGE         | NOCHANGE         | NOCHANGE         | NOCHANGE         | NOCHANGE         |
| NOCHANGE         | NOCHANGE         | NOCHANGE         | NOCHANGE         | NOCHANGE         |
| NOCHANGE         | NOCHANGE         | NOCHANGE         | NOCHANGE         | NOCHANGE         |
| NOCHANGE         | DOWN             | NOCHANGE         | NOCHANGE         | NOCHANGE         |
| NOCHANGE         | NOCHANGE         | NOCHANGE         | NOCHANGE         | NOCHANGE         |
| NOCHANGE         | DOWN             | DOWN             | NOCHANGE         | DOWN             |

|                  |                  |                  |                 |                  |
|------------------|------------------|------------------|-----------------|------------------|
| TCGA-B0-5104-01. | TCGA-B0-4945-01. | TCGA-B0-4842-01. | TCGA-AK-3447-01 | TCGA-B8-5551-01. |
| NOCHANGE         | NOCHANGE         | NOCHANGE         | DOWN            | NOCHANGE         |
| UP               | UP               | UP               | DOWN            | UP               |
| NOCHANGE         | NOCHANGE         | NOCHANGE         | NOCHANGE        | DOWN             |
| DOWN             | DOWN             | DOWN             | DOWN            | DOWN             |
| UP               | NOCHANGE         | UP               | DOWN            | NOCHANGE         |
| UP               | NOCHANGE         | UP               | DOWN            | UP               |
| NOCHANGE         | NOCHANGE         | DOWN             | NOCHANGE        | DOWN             |
| NOCHANGE         | NOCHANGE         | NOCHANGE         | NOCHANGE        | NOCHANGE         |
| NOCHANGE         | NOCHANGE         | NOCHANGE         | DOWN            | NOCHANGE         |
| NOCHANGE         | NOCHANGE         | NOCHANGE         | NOCHANGE        | NOCHANGE         |
| DOWN             | NOCHANGE         | UP               | NOCHANGE        | DOWN             |
| NOCHANGE         | NOCHANGE         | DOWN             | DOWN            | NOCHANGE         |
| NOCHANGE         | NOCHANGE         | NOCHANGE         | NOCHANGE        | NOCHANGE         |
| NOCHANGE         | NOCHANGE         | NOCHANGE         | DOWN            | NOCHANGE         |
| NOCHANGE         | NOCHANGE         | NOCHANGE         | NOCHANGE        | NOCHANGE         |
| DOWN             | NOCHANGE         | NOCHANGE         | DOWN            | DOWN             |
| NOCHANGE         | NOCHANGE         | NOCHANGE         | DOWN            | NOCHANGE         |
| NOCHANGE         | NOCHANGE         | NOCHANGE         | NOCHANGE        | NOCHANGE         |
| DOWN             | DOWN             | NOCHANGE         | DOWN            | DOWN             |
| NOCHANGE         | NOCHANGE         | DOWN             | NOCHANGE        | NOCHANGE         |
| UP               | NOCHANGE         | DOWN             | DOWN            | UP               |
| DOWN             | NOCHANGE         | NOCHANGE         | UP              | DOWN             |
| NOCHANGE         | NOCHANGE         | DOWN             | DOWN            | NOCHANGE         |
| DOWN             | NOCHANGE         | DOWN             | DOWN            | DOWN             |
| NOCHANGE         | NOCHANGE         | NOCHANGE         | DOWN            | UP               |
| NOCHANGE         | NOCHANGE         | NOCHANGE         | DOWN            | NOCHANGE         |
| NOCHANGE         | NOCHANGE         | DOWN             | DOWN            | UP               |
| DOWN             | DOWN             | NOCHANGE         | UP              | DOWN             |
| NOCHANGE         | NOCHANGE         | DOWN             | UP              | DOWN             |
| NOCHANGE         | NOCHANGE         | DOWN             | NOCHANGE        | NOCHANGE         |
| NOCHANGE         | UP               | NOCHANGE         | NOCHANGE        | NOCHANGE         |
| NOCHANGE         | NOCHANGE         | NOCHANGE         | DOWN            | NOCHANGE         |
| NOCHANGE         | NOCHANGE         | NOCHANGE         | DOWN            | NOCHANGE         |
| NOCHANGE         | NOCHANGE         | DOWN             | DOWN            | NOCHANGE         |
| NOCHANGE         | NOCHANGE         | DOWN             | DOWN            | NOCHANGE         |
| DOWN             | DOWN             | NOCHANGE         | UP              | DOWN             |

| TCGA-A3-3349-01 | TCGA-B0-4693-01 | TCGA-A3-3346-01 | TCGA-B0-5120-01 | TCGA-BP-5177-01 |
|-----------------|-----------------|-----------------|-----------------|-----------------|
| NOCHANGE        | NOCHANGE        | UP              | NOCHANGE        | NOCHANGE        |
| UP              | UP              | UP              | UP              | UP              |
| NOCHANGE        | NOCHANGE        | NOCHANGE        | NOCHANGE        | NOCHANGE        |
| NOCHANGE        | DOWN            | DOWN            | DOWN            | NOCHANGE        |
| NOCHANGE        | NOCHANGE        | NOCHANGE        | NOCHANGE        | DOWN            |
| NOCHANGE        | UP              | UP              | NOCHANGE        | NOCHANGE        |
| DOWN            | DOWN            | DOWN            | DOWN            | NOCHANGE        |
| DOWN            | NOCHANGE        | NOCHANGE        | NOCHANGE        | NOCHANGE        |
| DOWN            | UP              | UP              | DOWN            | DOWN            |
| NOCHANGE        | NOCHANGE        | NOCHANGE        | NOCHANGE        | NOCHANGE        |
| NOCHANGE        | DOWN            | NOCHANGE        | NOCHANGE        | NOCHANGE        |
| NOCHANGE        | DOWN            | NOCHANGE        | NOCHANGE        | NOCHANGE        |
| NOCHANGE        | NOCHANGE        | NOCHANGE        | NOCHANGE        | NOCHANGE        |
| NOCHANGE        | NOCHANGE        | NOCHANGE        | NOCHANGE        | NOCHANGE        |
| NOCHANGE        | NOCHANGE        | NOCHANGE        | NOCHANGE        | NOCHANGE        |
| NOCHANGE        | NOCHANGE        | NOCHANGE        | NOCHANGE        | NOCHANGE        |
| NOCHANGE        | DOWN            | DOWN            | DOWN            | NOCHANGE        |
| NOCHANGE        | NOCHANGE        | NOCHANGE        | UP              | NOCHANGE        |
| NOCHANGE        | UP              | NOCHANGE        | NOCHANGE        | NOCHANGE        |
| DOWN            | DOWN            | NOCHANGE        | NOCHANGE        | NOCHANGE        |
| NOCHANGE        | NOCHANGE        | DOWN            | NOCHANGE        | NOCHANGE        |
| DOWN            | NOCHANGE        | DOWN            | DOWN            | DOWN            |
| UP              | UP              | NOCHANGE        | UP              | NOCHANGE        |
| UP              | NOCHANGE        | UP              | UP              | NOCHANGE        |
| DOWN            | NOCHANGE        | UP              | NOCHANGE        | DOWN            |
| DOWN            | DOWN            | NOCHANGE        | NOCHANGE        | DOWN            |
| DOWN            | NOCHANGE        | DOWN            | DOWN            | DOWN            |
| NOCHANGE        | NOCHANGE        | UP              | NOCHANGE        | NOCHANGE        |
| NOCHANGE        | NOCHANGE        | NOCHANGE        | NOCHANGE        | UP              |
| NOCHANGE        | NOCHANGE        | NOCHANGE        | NOCHANGE        | NOCHANGE        |
| NOCHANGE        | NOCHANGE        | DOWN            | NOCHANGE        | NOCHANGE        |
| NOCHANGE        | NOCHANGE        | NOCHANGE        | NOCHANGE        | NOCHANGE        |
| DOWN            | DOWN            | NOCHANGE        | DOWN            | DOWN            |

| TCGA-B8-4154-01 | TCGA-B8-4153-01 | TCGA-CJ-6030-01 | TCGA-CW-5584-01 | TCGA-B0-5696-01 |
|-----------------|-----------------|-----------------|-----------------|-----------------|
| NOCHANGE        | NOCHANGE        | NOCHANGE        | NOCHANGE        | NOCHANGE        |
| UP              | UP              | UP              | UP              | UP              |
| NOCHANGE        | NOCHANGE        | NOCHANGE        | NOCHANGE        | NOCHANGE        |
| NOCHANGE        | DOWN            | DOWN            | DOWN            | DOWN            |
| NOCHANGE        | NOCHANGE        | UP              | NOCHANGE        | UP              |
| NOCHANGE        | NOCHANGE        | NOCHANGE        | NOCHANGE        | UP              |
| DOWN            | DOWN            | NOCHANGE        | NOCHANGE        | NOCHANGE        |
| NOCHANGE        | DOWN            | NOCHANGE        | NOCHANGE        | NOCHANGE        |
| NOCHANGE        | DOWN            | NOCHANGE        | DOWN            | NOCHANGE        |
| NOCHANGE        | NOCHANGE        | NOCHANGE        | NOCHANGE        | NOCHANGE        |
| NOCHANGE        | NOCHANGE        | NOCHANGE        | NOCHANGE        | NOCHANGE        |
| NOCHANGE        | NOCHANGE        | NOCHANGE        | NOCHANGE        | NOCHANGE        |
| NOCHANGE        | NOCHANGE        | NOCHANGE        | NOCHANGE        | NOCHANGE        |
| NOCHANGE        | NOCHANGE        | NOCHANGE        | DOWN            | DOWN            |
| NOCHANGE        | NOCHANGE        | NOCHANGE        | NOCHANGE        | NOCHANGE        |
| NOCHANGE        | DOWN            | NOCHANGE        | NOCHANGE        | NOCHANGE        |
| DOWN            | DOWN            | DOWN            | NOCHANGE        | DOWN            |
| NOCHANGE        | NOCHANGE        | NOCHANGE        | NOCHANGE        | UP              |
| NOCHANGE        | NOCHANGE        | UP              | UP              | NOCHANGE        |
| NOCHANGE        | NOCHANGE        | NOCHANGE        | DOWN            | UP              |
| NOCHANGE        | NOCHANGE        | UP              | NOCHANGE        | NOCHANGE        |
| DOWN            | DOWN            | DOWN            | NOCHANGE        | DOWN            |
| NOCHANGE        | NOCHANGE        | UP              | UP              | NOCHANGE        |
| NOCHANGE        | UP              | NOCHANGE        | NOCHANGE        | NOCHANGE        |
| DOWN            | DOWN            | NOCHANGE        | NOCHANGE        | UP              |
| NOCHANGE        | NOCHANGE        | NOCHANGE        | NOCHANGE        | NOCHANGE        |
| NOCHANGE        | DOWN            | NOCHANGE        | NOCHANGE        | NOCHANGE        |
| NOCHANGE        | NOCHANGE        | NOCHANGE        | NOCHANGE        | UP              |
| NOCHANGE        | NOCHANGE        | NOCHANGE        | NOCHANGE        | NOCHANGE        |
| NOCHANGE        | NOCHANGE        | NOCHANGE        | NOCHANGE        | NOCHANGE        |
| NOCHANGE        | NOCHANGE        | NOCHANGE        | NOCHANGE        | NOCHANGE        |
| NOCHANGE        | NOCHANGE        | NOCHANGE        | NOCHANGE        | NOCHANGE        |
| NOCHANGE        | NOCHANGE        | NOCHANGE        | NOCHANGE        | NOCHANGE        |
| NOCHANGE        | NOCHANGE        | NOCHANGE        | NOCHANGE        | NOCHANGE        |
| NOCHANGE        | NOCHANGE        | NOCHANGE        | NOCHANGE        | NOCHANGE        |
| NOCHANGE        | DOWN            | DOWN            | DOWN            | DOWN            |

| TCGA-BP-4765-01 | TCGA-BP-4782-01 | TCGA-B8-5165-01 | TCGA-B2-3923-01 | TCGA-AK-3425-01 |
|-----------------|-----------------|-----------------|-----------------|-----------------|
| NOCHANGE        | NOCHANGE        | NOCHANGE        | DOWN            | UP              |
| UP              | UP              | UP              | NOCHANGE        | UP              |
| NOCHANGE        | NOCHANGE        | NOCHANGE        | NOCHANGE        | NOCHANGE        |
| NOCHANGE        | DOWN            | DOWN            | DOWN            | DOWN            |
| UP              | NOCHANGE        | NOCHANGE        | NOCHANGE        | UP              |
| NOCHANGE        | NOCHANGE        | NOCHANGE        | NOCHANGE        | NOCHANGE        |
| DOWN            | DOWN            | NOCHANGE        | NOCHANGE        | DOWN            |
| NOCHANGE        | NOCHANGE        | NOCHANGE        | DOWN            | NOCHANGE        |
| DOWN            | UP              | NOCHANGE        | NOCHANGE        | NOCHANGE        |
| NOCHANGE        | NOCHANGE        | NOCHANGE        | UP              | NOCHANGE        |
| NOCHANGE        | NOCHANGE        | DOWN            | DOWN            | DOWN            |
| NOCHANGE        | UP              | NOCHANGE        | UP              | NOCHANGE        |
| NOCHANGE        | NOCHANGE        | NOCHANGE        | NOCHANGE        | NOCHANGE        |
| NOCHANGE        | NOCHANGE        | NOCHANGE        | DOWN            | NOCHANGE        |
| DOWN            | DOWN            | DOWN            | DOWN            | NOCHANGE        |
| NOCHANGE        | UP              | NOCHANGE        | UP              | NOCHANGE        |
| NOCHANGE        | NOCHANGE        | NOCHANGE        | NOCHANGE        | NOCHANGE        |
| DOWN            | DOWN            | DOWN            | NOCHANGE        | NOCHANGE        |
| NOCHANGE        | NOCHANGE        | NOCHANGE        | NOCHANGE        | NOCHANGE        |
| DOWN            | NOCHANGE        | NOCHANGE        | DOWN            | NOCHANGE        |
| NOCHANGE        | NOCHANGE        | NOCHANGE        | NOCHANGE        | UP              |
| NOCHANGE        | NOCHANGE        | NOCHANGE        | DOWN            | NOCHANGE        |
| NOCHANGE        | NOCHANGE        | NOCHANGE        | NOCHANGE        | UP              |
| NOCHANGE        | NOCHANGE        | DOWN            | DOWN            | NOCHANGE        |
| NOCHANGE        | NOCHANGE        | NOCHANGE        | UP              | DOWN            |
| NOCHANGE        | NOCHANGE        | NOCHANGE        | DOWN            | NOCHANGE        |
| NOCHANGE        | NOCHANGE        | NOCHANGE        | UP              | NOCHANGE        |
| NOCHANGE        | NOCHANGE        | NOCHANGE        | NOCHANGE        | NOCHANGE        |
| NOCHANGE        | DOWN            | NOCHANGE        | NOCHANGE        | NOCHANGE        |
| NOCHANGE        | NOCHANGE        | NOCHANGE        | NOCHANGE        | NOCHANGE        |
| DOWN            | DOWN            | DOWN            | UP              | DOWN            |

| TCGA-AS-3778-01 | TCGA-CW-6087-01 | TCGA-B0-5108-01 | TCGA-B0-5699-01 | TCGA-B0-4814-01 |
|-----------------|-----------------|-----------------|-----------------|-----------------|
| NOCHANGE        | NOCHANGE        | NOCHANGE        | NOCHANGE        | NOCHANGE        |
| UP              | UP              | UP              | UP              | UP              |
| NOCHANGE        | NOCHANGE        | NOCHANGE        | NOCHANGE        | NOCHANGE        |
| DOWN            | DOWN            | DOWN            | DOWN            | DOWN            |
| NOCHANGE        | UP              | UP              | NOCHANGE        | NOCHANGE        |
| NOCHANGE        | NOCHANGE        | NOCHANGE        | NOCHANGE        | UP              |
| NOCHANGE        | DOWN            | DOWN            | DOWN            | DOWN            |
| NOCHANGE        | NOCHANGE        | NOCHANGE        | DOWN            | NOCHANGE        |
| NOCHANGE        | UP              | NOCHANGE        | DOWN            | NOCHANGE        |
| NOCHANGE        | DOWN            | NOCHANGE        | NOCHANGE        | NOCHANGE        |
| NOCHANGE        | NOCHANGE        | NOCHANGE        | NOCHANGE        | NOCHANGE        |
| NOCHANGE        | NOCHANGE        | DOWN            | DOWN            | DOWN            |
| NOCHANGE        | DOWN            | NOCHANGE        | NOCHANGE        | NOCHANGE        |
| NOCHANGE        | UP              | NOCHANGE        | NOCHANGE        | NOCHANGE        |
| NOCHANGE        | DOWN            | DOWN            | NOCHANGE        | DOWN            |
| NOCHANGE        | NOCHANGE        | NOCHANGE        | NOCHANGE        | NOCHANGE        |
| NOCHANGE        | UP              | NOCHANGE        | UP              | NOCHANGE        |
| DOWN            | DOWN            | DOWN            | NOCHANGE        | NOCHANGE        |
| NOCHANGE        | UP              | NOCHANGE        | UP              | UP              |
| DOWN            | DOWN            | DOWN            | DOWN            | NOCHANGE        |
| NOCHANGE        | UP              | UP              | NOCHANGE        | NOCHANGE        |
| NOCHANGE        | NOCHANGE        | UP              | NOCHANGE        | NOCHANGE        |
| DOWN            | UP              | NOCHANGE        | NOCHANGE        | NOCHANGE        |
| NOCHANGE        | DOWN            | DOWN            | NOCHANGE        | NOCHANGE        |
| DOWN            | DOWN            | DOWN            | NOCHANGE        | NOCHANGE        |
| NOCHANGE        | NOCHANGE        | DOWN            | NOCHANGE        | NOCHANGE        |
| NOCHANGE        | NOCHANGE        | NOCHANGE        | NOCHANGE        | NOCHANGE        |
| NOCHANGE        | NOCHANGE        | NOCHANGE        | NOCHANGE        | NOCHANGE        |
| DOWN            | NOCHANGE        | NOCHANGE        | NOCHANGE        | NOCHANGE        |
| NOCHANGE        | DOWN            | NOCHANGE        | NOCHANGE        | NOCHANGE        |
| DOWN            | DOWN            | DOWN            | DOWN            | NOCHANGE        |



| TCGA-AK-3465-01 | TCGA-CJ-4918-01 | TCGA-BP-4344-01 | TCGA-B4-5835-01 | TCGA-A3-3372-01 |
|-----------------|-----------------|-----------------|-----------------|-----------------|
| NOCHANGE        | NOCHANGE        | NOCHANGE        | UP              | NOCHANGE        |
| NOCHANGE        | UP              | UP              | UP              | NOCHANGE        |
| NOCHANGE        | NOCHANGE        | NOCHANGE        | NOCHANGE        | NOCHANGE        |
| DOWN            | DOWN            | NOCHANGE        | DOWN            | DOWN            |
| DOWN            | NOCHANGE        | NOCHANGE        | NOCHANGE        | NOCHANGE        |
| NOCHANGE        | NOCHANGE        | NOCHANGE        | UP              | NOCHANGE        |
| NOCHANGE        | NOCHANGE        | DOWN            | NOCHANGE        | DOWN            |
| NOCHANGE        | NOCHANGE        | NOCHANGE        | NOCHANGE        | NOCHANGE        |
| NOCHANGE        | NOCHANGE        | NOCHANGE        | NOCHANGE        | NOCHANGE        |
| UP              | NOCHANGE        | NOCHANGE        | NOCHANGE        | DOWN            |
| DOWN            | DOWN            | NOCHANGE        | UP              | DOWN            |
| UP              | NOCHANGE        | NOCHANGE        | NOCHANGE        | UP              |
| NOCHANGE        | NOCHANGE        | NOCHANGE        | NOCHANGE        | NOCHANGE        |
| DOWN            | NOCHANGE        | NOCHANGE        | UP              | NOCHANGE        |
| DOWN            | DOWN            | DOWN            | DOWN            | DOWN            |
| UP              | NOCHANGE        | NOCHANGE        | UP              | UP              |
| NOCHANGE        | NOCHANGE        | NOCHANGE        | NOCHANGE        | NOCHANGE        |
| DOWN            | DOWN            | DOWN            | NOCHANGE        | DOWN            |
| DOWN            | NOCHANGE        | UP              | NOCHANGE        | UP              |
| DOWN            | DOWN            | DOWN            | NOCHANGE        | NOCHANGE        |
| NOCHANGE        | UP              | UP              | NOCHANGE        | UP              |
| NOCHANGE        | NOCHANGE        | NOCHANGE        | NOCHANGE        | UP              |
| DOWN            | NOCHANGE        | NOCHANGE        | UP              | NOCHANGE        |
| UP              | DOWN            | DOWN            | NOCHANGE        | DOWN            |
| NOCHANGE        | DOWN            | DOWN            | DOWN            | DOWN            |
| DOWN            | NOCHANGE        | NOCHANGE        | NOCHANGE        | DOWN            |
| NOCHANGE        | NOCHANGE        | NOCHANGE        | NOCHANGE        | NOCHANGE        |
| DOWN            | NOCHANGE        | NOCHANGE        | NOCHANGE        | NOCHANGE        |
| DOWN            | NOCHANGE        | NOCHANGE        | NOCHANGE        | NOCHANGE        |
| DOWN            | NOCHANGE        | NOCHANGE        | NOCHANGE        | NOCHANGE        |
| DOWN            | NOCHANGE        | UP              | DOWN            | DOWN            |
| NOCHANGE        | DOWN            | DOWN            | UP              | DOWN            |

|                  |                  |                  |                  |                  |
|------------------|------------------|------------------|------------------|------------------|
| TCGA-BP-4981-01. | TCGA-BP-4170-01. | TCGA-CJ-4643-01. | TCGA-BP-4977-01. | TCGA-B2-5633-01. |
| NOCHANGE         | NOCHANGE         | NOCHANGE         | UP               | NOCHANGE         |
| UP               | UP               | UP               | UP               | UP               |
| NOCHANGE         | NOCHANGE         | NOCHANGE         | NOCHANGE         | NOCHANGE         |
| DOWN             | DOWN             | NOCHANGE         | NOCHANGE         | DOWN             |
| UP               | NOCHANGE         | NOCHANGE         | NOCHANGE         | UP               |
| NOCHANGE         | UP               | UP               | NOCHANGE         | NOCHANGE         |
| NOCHANGE         | DOWN             | NOCHANGE         | DOWN             | DOWN             |
| NOCHANGE         | NOCHANGE         | NOCHANGE         | NOCHANGE         | NOCHANGE         |
| NOCHANGE         | NOCHANGE         | NOCHANGE         | NOCHANGE         | NOCHANGE         |
| DOWN             | NOCHANGE         | NOCHANGE         | NOCHANGE         | NOCHANGE         |
| NOCHANGE         | DOWN             | NOCHANGE         | NOCHANGE         | NOCHANGE         |
| DOWN             | DOWN             | NOCHANGE         | NOCHANGE         | NOCHANGE         |
| NOCHANGE         | NOCHANGE         | NOCHANGE         | NOCHANGE         | NOCHANGE         |
| DOWN             | NOCHANGE         | NOCHANGE         | NOCHANGE         | NOCHANGE         |
| DOWN             | NOCHANGE         | NOCHANGE         | NOCHANGE         | NOCHANGE         |
| DOWN             | NOCHANGE         | NOCHANGE         | NOCHANGE         | NOCHANGE         |
| NOCHANGE         | NOCHANGE         | UP               | NOCHANGE         | NOCHANGE         |
| NOCHANGE         | NOCHANGE         | DOWN             | DOWN             | DOWN             |
| NOCHANGE         | NOCHANGE         | UP               | UP               | NOCHANGE         |
| DOWN             | DOWN             | DOWN             | NOCHANGE         | DOWN             |
| NOCHANGE         | UP               | UP               | NOCHANGE         | UP               |
| NOCHANGE         | NOCHANGE         | NOCHANGE         | NOCHANGE         | UP               |
| DOWN             | NOCHANGE         | NOCHANGE         | NOCHANGE         | NOCHANGE         |
| NOCHANGE         | NOCHANGE         | NOCHANGE         | NOCHANGE         | NOCHANGE         |
| DOWN             | NOCHANGE         | DOWN             | NOCHANGE         | DOWN             |
| NOCHANGE         | NOCHANGE         | NOCHANGE         | DOWN             | DOWN             |
| DOWN             | NOCHANGE         | NOCHANGE         | NOCHANGE         | DOWN             |
| NOCHANGE         | NOCHANGE         | NOCHANGE         | NOCHANGE         | NOCHANGE         |
| NOCHANGE         | NOCHANGE         | NOCHANGE         | NOCHANGE         | NOCHANGE         |
| DOWN             | NOCHANGE         | NOCHANGE         | DOWN             | DOWN             |
| NOCHANGE         | NOCHANGE         | NOCHANGE         | DOWN             | DOWN             |
| DOWN             | DOWN             | DOWN             | DOWN             | DOWN             |

| TCGA-A3-3311-01 | TCGA-BP-5173-01 | TCGA-BP-5007-01 | TCGA-A3-3362-01 | TCGA-BP-4781-01 |
|-----------------|-----------------|-----------------|-----------------|-----------------|
| NOCHANGE        | NOCHANGE        | NOCHANGE        | NOCHANGE        | NOCHANGE        |
| UP              | UP              | UP              | UP              | UP              |
| NOCHANGE        | NOCHANGE        | NOCHANGE        | NOCHANGE        | NOCHANGE        |
| DOWN            | DOWN            | NOCHANGE        | NOCHANGE        | DOWN            |
| UP              | NOCHANGE        | NOCHANGE        | NOCHANGE        | NOCHANGE        |
| NOCHANGE        | NOCHANGE        | NOCHANGE        | UP              | NOCHANGE        |
| DOWN            | DOWN            | NOCHANGE        | DOWN            | NOCHANGE        |
| DOWN            | DOWN            | NOCHANGE        | NOCHANGE        | NOCHANGE        |
| NOCHANGE        | NOCHANGE        | NOCHANGE        | NOCHANGE        | NOCHANGE        |
| NOCHANGE        | NOCHANGE        | NOCHANGE        | NOCHANGE        | NOCHANGE        |
| NOCHANGE        | NOCHANGE        | NOCHANGE        | NOCHANGE        | DOWN            |
| NOCHANGE        | NOCHANGE        | NOCHANGE        | NOCHANGE        | DOWN            |
| DOWN            | NOCHANGE        | NOCHANGE        | UP              | UP              |
| NOCHANGE        | NOCHANGE        | NOCHANGE        | NOCHANGE        | NOCHANGE        |
| NOCHANGE        | NOCHANGE        | NOCHANGE        | NOCHANGE        | NOCHANGE        |
| DOWN            | DOWN            | NOCHANGE        | NOCHANGE        | NOCHANGE        |
| NOCHANGE        | NOCHANGE        | DOWN            | DOWN            | DOWN            |
| NOCHANGE        | NOCHANGE        | NOCHANGE        | NOCHANGE        | NOCHANGE        |
| UP              | NOCHANGE        | NOCHANGE        | NOCHANGE        | NOCHANGE        |
| DOWN            | NOCHANGE        | DOWN            | NOCHANGE        | DOWN            |
| UP              | NOCHANGE        | NOCHANGE        | NOCHANGE        | NOCHANGE        |
| DOWN            | DOWN            | NOCHANGE        | NOCHANGE        | NOCHANGE        |
| UP              | NOCHANGE        | NOCHANGE        | NOCHANGE        | UP              |
| UP              | NOCHANGE        | NOCHANGE        | NOCHANGE        | UP              |
| NOCHANGE        | NOCHANGE        | DOWN            | NOCHANGE        | NOCHANGE        |
| NOCHANGE        | NOCHANGE        | DOWN            | NOCHANGE        | DOWN            |
| NOCHANGE        | DOWN            | DOWN            | NOCHANGE        | DOWN            |
| NOCHANGE        | NOCHANGE        | NOCHANGE        | NOCHANGE        | NOCHANGE        |
| NOCHANGE        | NOCHANGE        | UP              | UP              | NOCHANGE        |
| NOCHANGE        | NOCHANGE        | NOCHANGE        | NOCHANGE        | NOCHANGE        |
| NOCHANGE        | NOCHANGE        | DOWN            | NOCHANGE        | NOCHANGE        |
| NOCHANGE        | NOCHANGE        | DOWN            | NOCHANGE        | NOCHANGE        |
| NOCHANGE        | DOWN            | DOWN            | DOWN            | DOWN            |

| TCGA-A3-3365-01 | TCGA-DV-A4W0-0 | TCGA-B0-5092-01 | TCGA-CJ-5683-01 | TCGA-BP-4331-01 |
|-----------------|----------------|-----------------|-----------------|-----------------|
| NOCHANGE        | NOCHANGE       | NOCHANGE        | NOCHANGE        | NOCHANGE        |
| UP              | UP             | UP              | UP              | UP              |
| NOCHANGE        | NOCHANGE       | NOCHANGE        | NOCHANGE        | NOCHANGE        |
| NOCHANGE        | DOWN           | DOWN            | DOWN            | DOWN            |
| DOWN            | NOCHANGE       | NOCHANGE        | NOCHANGE        | NOCHANGE        |
| NOCHANGE        | UP             | NOCHANGE        | NOCHANGE        | NOCHANGE        |
| NOCHANGE        | NOCHANGE       | NOCHANGE        | NOCHANGE        | DOWN            |
| NOCHANGE        | NOCHANGE       | NOCHANGE        | NOCHANGE        | DOWN            |
| UP              | UP             | NOCHANGE        | NOCHANGE        | DOWN            |
| DOWN            | NOCHANGE       | NOCHANGE        | NOCHANGE        | NOCHANGE        |
| NOCHANGE        | NOCHANGE       | NOCHANGE        | NOCHANGE        | DOWN            |
| NOCHANGE        | NOCHANGE       | NOCHANGE        | NOCHANGE        | NOCHANGE        |
| NOCHANGE        | NOCHANGE       | NOCHANGE        | NOCHANGE        | NOCHANGE        |
| NOCHANGE        | NOCHANGE       | NOCHANGE        | NOCHANGE        | NOCHANGE        |
| NOCHANGE        | NOCHANGE       | NOCHANGE        | NOCHANGE        | NOCHANGE        |
| DOWN            | NOCHANGE       | DOWN            | DOWN            | DOWN            |
| UP              | NOCHANGE       | NOCHANGE        | NOCHANGE        | NOCHANGE        |
| NOCHANGE        | UP             | NOCHANGE        | NOCHANGE        | NOCHANGE        |
| DOWN            | UP             | NOCHANGE        | NOCHANGE        | DOWN            |
| NOCHANGE        | NOCHANGE       | NOCHANGE        | NOCHANGE        | NOCHANGE        |
| DOWN            | DOWN           | DOWN            | NOCHANGE        | DOWN            |
| NOCHANGE        | NOCHANGE       | NOCHANGE        | NOCHANGE        | UP              |
| NOCHANGE        | NOCHANGE       | UP              | NOCHANGE        | NOCHANGE        |
| NOCHANGE        | UP             | DOWN            | NOCHANGE        | NOCHANGE        |
| DOWN            | DOWN           | DOWN            | NOCHANGE        | NOCHANGE        |
| DOWN            | DOWN           | DOWN            | NOCHANGE        | NOCHANGE        |
| NOCHANGE        | NOCHANGE       | NOCHANGE        | NOCHANGE        | NOCHANGE        |
| NOCHANGE        | NOCHANGE       | NOCHANGE        | NOCHANGE        | NOCHANGE        |
| NOCHANGE        | NOCHANGE       | NOCHANGE        | NOCHANGE        | NOCHANGE        |
| NOCHANGE        | UP             | DOWN            | NOCHANGE        | NOCHANGE        |
| NOCHANGE        | NOCHANGE       | NOCHANGE        | NOCHANGE        | NOCHANGE        |
| DOWN            | NOCHANGE       | DOWN            | DOWN            | DOWN            |

| TCGA-B2-A4SR-01 | TCGA-BP-4976-01 | TCGA-B2-4099-01 | TCGA-B2-3923-01 | TCGA-G6-A5PC-01 |
|-----------------|-----------------|-----------------|-----------------|-----------------|
| NOCHANGE        | NOCHANGE        | NOCHANGE        | DOWN            | NOCHANGE        |
| UP              | UP              | UP              | NOCHANGE        | UP              |
| NOCHANGE        | NOCHANGE        | NOCHANGE        | NOCHANGE        | NOCHANGE        |
| DOWN            | DOWN            | DOWN            | NOCHANGE        | DOWN            |
| NOCHANGE        | NOCHANGE        | NOCHANGE        | NOCHANGE        | UP              |
| NOCHANGE        | NOCHANGE        | NOCHANGE        | DOWN            | NOCHANGE        |
| NOCHANGE        | DOWN            | NOCHANGE        | NOCHANGE        | DOWN            |
| NOCHANGE        | DOWN            | NOCHANGE        | DOWN            | NOCHANGE        |
| NOCHANGE        | DOWN            | DOWN            | NOCHANGE        | NOCHANGE        |
| NOCHANGE        | NOCHANGE        | NOCHANGE        | NOCHANGE        | UP              |
| NOCHANGE        | NOCHANGE        | NOCHANGE        | DOWN            | UP              |
| UP              | NOCHANGE        | DOWN            | UP              | NOCHANGE        |
| NOCHANGE        | NOCHANGE        | NOCHANGE        | NOCHANGE        | NOCHANGE        |
| NOCHANGE        | NOCHANGE        | NOCHANGE        | NOCHANGE        | DOWN            |
| DOWN            | DOWN            | DOWN            | DOWN            | NOCHANGE        |
| NOCHANGE        | NOCHANGE        | NOCHANGE        | UP              | DOWN            |
| UP              | NOCHANGE        | NOCHANGE        | NOCHANGE        | DOWN            |
| DOWN            | NOCHANGE        | NOCHANGE        | DOWN            | UP              |
| NOCHANGE        | NOCHANGE        | NOCHANGE        | UP              | NOCHANGE        |
| NOCHANGE        | NOCHANGE        | DOWN            | DOWN            | DOWN            |
| UP              | NOCHANGE        | UP              | NOCHANGE        | NOCHANGE        |
| NOCHANGE        | NOCHANGE        | NOCHANGE        | NOCHANGE        | NOCHANGE        |
| NOCHANGE        | NOCHANGE        | NOCHANGE        | NOCHANGE        | DOWN            |
| DOWN            | NOCHANGE        | NOCHANGE        | DOWN            | UP              |
| DOWN            | NOCHANGE        | NOCHANGE        | NOCHANGE        | DOWN            |
| NOCHANGE        | DOWN            | NOCHANGE        | DOWN            | DOWN            |
| NOCHANGE        | NOCHANGE        | NOCHANGE        | NOCHANGE        | NOCHANGE        |
| NOCHANGE        | NOCHANGE        | NOCHANGE        | NOCHANGE        | NOCHANGE        |
| NOCHANGE        | NOCHANGE        | NOCHANGE        | NOCHANGE        | NOCHANGE        |
| NOCHANGE        | DOWN            | NOCHANGE        | NOCHANGE        | DOWN            |
| NOCHANGE        | DOWN            | NOCHANGE        | NOCHANGE        | DOWN            |
| DOWN            | DOWN            | NOCHANGE        | NOCHANGE        | NOCHANGE        |

| TCGA-B0-5812-01 | TCGA-BP-4341-01 | TCGA-BP-4795-01 | TCGA-AK-3451-01 | TCGA-CZ-5987-01 |
|-----------------|-----------------|-----------------|-----------------|-----------------|
| NOCHANGE        | NOCHANGE        | DOWN            | UP              | NOCHANGE        |
| UP              | UP              | NOCHANGE        | UP              | UP              |
| NOCHANGE        | NOCHANGE        | NOCHANGE        | NOCHANGE        | NOCHANGE        |
| DOWN            | DOWN            | DOWN            | DOWN            | DOWN            |
| NOCHANGE        | NOCHANGE        | DOWN            | UP              | UP              |
| NOCHANGE        | NOCHANGE        | DOWN            | NOCHANGE        | NOCHANGE        |
| NOCHANGE        | NOCHANGE        | NOCHANGE        | NOCHANGE        | DOWN            |
| NOCHANGE        | NOCHANGE        | NOCHANGE        | NOCHANGE        | NOCHANGE        |
| UP              | NOCHANGE        | UP              | NOCHANGE        | NOCHANGE        |
| NOCHANGE        | NOCHANGE        | NOCHANGE        | NOCHANGE        | NOCHANGE        |
| NOCHANGE        | NOCHANGE        | DOWN            | UP              | NOCHANGE        |
| DOWN            | UP              | NOCHANGE        | DOWN            | NOCHANGE        |
| NOCHANGE        | NOCHANGE        | NOCHANGE        | NOCHANGE        | NOCHANGE        |
| NOCHANGE        | NOCHANGE        | NOCHANGE        | NOCHANGE        | DOWN            |
| DOWN            | DOWN            | NOCHANGE        | DOWN            | DOWN            |
| NOCHANGE        | NOCHANGE        | NOCHANGE        | NOCHANGE        | DOWN            |
| NOCHANGE        | NOCHANGE        | NOCHANGE        | DOWN            | NOCHANGE        |
| DOWN            | NOCHANGE        | DOWN            | UP              | NOCHANGE        |
| NOCHANGE        | NOCHANGE        | NOCHANGE        | DOWN            | UP              |
| DOWN            | DOWN            | DOWN            | DOWN            | NOCHANGE        |
| NOCHANGE        | NOCHANGE        | NOCHANGE        | NOCHANGE        | NOCHANGE        |
| UP              | NOCHANGE        | UP              | DOWN            | NOCHANGE        |
| NOCHANGE        | DOWN            | NOCHANGE        | DOWN            | NOCHANGE        |
| DOWN            | NOCHANGE        | DOWN            | UP              | NOCHANGE        |
| NOCHANGE        | DOWN            | DOWN            | NOCHANGE        | DOWN            |
| NOCHANGE        | NOCHANGE        | NOCHANGE        | UP              | NOCHANGE        |
| NOCHANGE        | NOCHANGE        | NOCHANGE        | NOCHANGE        | NOCHANGE        |
| NOCHANGE        | NOCHANGE        | NOCHANGE        | NOCHANGE        | NOCHANGE        |
| NOCHANGE        | NOCHANGE        | NOCHANGE        | DOWN            | NOCHANGE        |
| NOCHANGE        | NOCHANGE        | NOCHANGE        | DOWN            | NOCHANGE        |
| NOCHANGE        | NOCHANGE        | NOCHANGE        | DOWN            | NOCHANGE        |
| DOWN            | DOWN            | DOWN            | UP              | DOWN            |

| TCGA-MM-A564-0 | TCGA-BP-4787-01 | TCGA-DV-5566-01 | TCGA-BP-5190-01 | TCGA-BP-4162-01 |
|----------------|-----------------|-----------------|-----------------|-----------------|
| NOCHANGE       | UP              | NOCHANGE        | NOCHANGE        | NOCHANGE        |
| UP             | UP              | UP              | UP              | UP              |
| NOCHANGE       | NOCHANGE        | NOCHANGE        | NOCHANGE        | NOCHANGE        |
| DOWN           | DOWN            | DOWN            | DOWN            | DOWN            |
| DOWN           | UP              | NOCHANGE        | UP              | NOCHANGE        |
| NOCHANGE       | NOCHANGE        | NOCHANGE        | UP              | UP              |
| DOWN           | DOWN            | DOWN            | DOWN            | DOWN            |
| NOCHANGE       | UP              | NOCHANGE        | NOCHANGE        | NOCHANGE        |
| NOCHANGE       | NOCHANGE        | DOWN            | NOCHANGE        | NOCHANGE        |
| NOCHANGE       | NOCHANGE        | NOCHANGE        | NOCHANGE        | NOCHANGE        |
| UP             | NOCHANGE        | NOCHANGE        | UP              | DOWN            |
| NOCHANGE       | UP              | NOCHANGE        | DOWN            | DOWN            |
| NOCHANGE       | NOCHANGE        | NOCHANGE        | NOCHANGE        | NOCHANGE        |
| DOWN           | NOCHANGE        | NOCHANGE        | DOWN            | NOCHANGE        |
| DOWN           | NOCHANGE        | NOCHANGE        | DOWN            | DOWN            |
| NOCHANGE       | NOCHANGE        | NOCHANGE        | NOCHANGE        | NOCHANGE        |
| NOCHANGE       | NOCHANGE        | UP              | NOCHANGE        | NOCHANGE        |
| NOCHANGE       | DOWN            | NOCHANGE        | UP              | DOWN            |
| NOCHANGE       | UP              | NOCHANGE        | NOCHANGE        | NOCHANGE        |
| DOWN           | NOCHANGE        | DOWN            | NOCHANGE        | NOCHANGE        |
| NOCHANGE       | UP              | NOCHANGE        | NOCHANGE        | UP              |
| NOCHANGE       | NOCHANGE        | UP              | NOCHANGE        | UP              |
| DOWN           | NOCHANGE        | DOWN            | UP              | NOCHANGE        |
| NOCHANGE       | DOWN            | NOCHANGE        | NOCHANGE        | DOWN            |
| DOWN           | DOWN            | NOCHANGE        | NOCHANGE        | NOCHANGE        |
| DOWN           | NOCHANGE        | NOCHANGE        | UP              | NOCHANGE        |
| NOCHANGE       | NOCHANGE        | NOCHANGE        | NOCHANGE        | NOCHANGE        |
| NOCHANGE       | NOCHANGE        | UP              | DOWN            | NOCHANGE        |
| DOWN           | DOWN            | NOCHANGE        | DOWN            | NOCHANGE        |
| NOCHANGE       | NOCHANGE        | UP              | DOWN            | NOCHANGE        |
| DOWN           | DOWN            | NOCHANGE        | NOCHANGE        | DOWN            |

| TCGA-BP-4343-01. | TCGA-AK-3458-01 | TCGA-CZ-5457-01 | TCGA-A3-A8OX-0 | TCGA-B0-4817-01. |
|------------------|-----------------|-----------------|----------------|------------------|
| NOCHANGE         | NOCHANGE        | NOCHANGE        | NOCHANGE       | UP               |
| UP               | UP              | UP              | UP             | UP               |
| NOCHANGE         | NOCHANGE        | NOCHANGE        | NOCHANGE       | NOCHANGE         |
| DOWN             | DOWN            | DOWN            | NOCHANGE       | NOCHANGE         |
| NOCHANGE         | NOCHANGE        | UP              | UP             | UP               |
| NOCHANGE         | NOCHANGE        | NOCHANGE        | UP             | UP               |
| DOWN             | NOCHANGE        | DOWN            | NOCHANGE       | NOCHANGE         |
| NOCHANGE         | NOCHANGE        | NOCHANGE        | NOCHANGE       | NOCHANGE         |
| NOCHANGE         | NOCHANGE        | NOCHANGE        | DOWN           | UP               |
| DOWN             | NOCHANGE        | DOWN            | NOCHANGE       | NOCHANGE         |
| NOCHANGE         | UP              | NOCHANGE        | NOCHANGE       | UP               |
| DOWN             | NOCHANGE        | NOCHANGE        | NOCHANGE       | NOCHANGE         |
| NOCHANGE         | NOCHANGE        | NOCHANGE        | NOCHANGE       | NOCHANGE         |
| NOCHANGE         | NOCHANGE        | NOCHANGE        | NOCHANGE       | NOCHANGE         |
| DOWN             | DOWN            | DOWN            | NOCHANGE       | NOCHANGE         |
| NOCHANGE         | NOCHANGE        | NOCHANGE        | NOCHANGE       | NOCHANGE         |
| NOCHANGE         | DOWN            | NOCHANGE        | NOCHANGE       | DOWN             |
| NOCHANGE         | NOCHANGE        | DOWN            | NOCHANGE       | UP               |
| NOCHANGE         | NOCHANGE        | NOCHANGE        | NOCHANGE       | NOCHANGE         |
| DOWN             | DOWN            | NOCHANGE        | NOCHANGE       | NOCHANGE         |
| UP               | NOCHANGE        | NOCHANGE        | NOCHANGE       | NOCHANGE         |
| NOCHANGE         | NOCHANGE        | NOCHANGE        | UP             | NOCHANGE         |
| NOCHANGE         | DOWN            | NOCHANGE        | NOCHANGE       | UP               |
| NOCHANGE         | NOCHANGE        | DOWN            | DOWN           | DOWN             |
| NOCHANGE         | NOCHANGE        | NOCHANGE        | NOCHANGE       | NOCHANGE         |
| DOWN             | NOCHANGE        | NOCHANGE        | NOCHANGE       | NOCHANGE         |
| NOCHANGE         | UP              | NOCHANGE        | NOCHANGE       | NOCHANGE         |
| NOCHANGE         | NOCHANGE        | NOCHANGE        | NOCHANGE       | NOCHANGE         |
| NOCHANGE         | DOWN            | NOCHANGE        | NOCHANGE       | DOWN             |
| NOCHANGE         | DOWN            | NOCHANGE        | NOCHANGE       | NOCHANGE         |
| DOWN             | NOCHANGE        | DOWN            | NOCHANGE       | NOCHANGE         |



| TCGA-CJ-4888-01 | TCGA-BP-5191-01 | TCGA-B2-5635-01 | TCGA-T7-A92I-01 | TCGA-CJ-4901-01 |
|-----------------|-----------------|-----------------|-----------------|-----------------|
| NOCHANGE        | NOCHANGE        | NOCHANGE        | DOWN            | NOCHANGE        |
| UP              | UP              | UP              | NOCHANGE        | UP              |
| NOCHANGE        | NOCHANGE        | NOCHANGE        | NOCHANGE        | NOCHANGE        |
| DOWN            | DOWN            | DOWN            | NOCHANGE        | DOWN            |
| UP              | NOCHANGE        | UP              | NOCHANGE        | NOCHANGE        |
| NOCHANGE        | NOCHANGE        | NOCHANGE        | UP              | NOCHANGE        |
| DOWN            | NOCHANGE        | DOWN            | NOCHANGE        | NOCHANGE        |
| NOCHANGE        | NOCHANGE        | NOCHANGE        | DOWN            | NOCHANGE        |
| NOCHANGE        | DOWN            | DOWN            | DOWN            | NOCHANGE        |
| NOCHANGE        | NOCHANGE        | NOCHANGE        | NOCHANGE        | NOCHANGE        |
| NOCHANGE        | UP              | NOCHANGE        | NOCHANGE        | DOWN            |
| DOWN            | NOCHANGE        | NOCHANGE        | UP              | NOCHANGE        |
| NOCHANGE        | NOCHANGE        | NOCHANGE        | NOCHANGE        | NOCHANGE        |
| NOCHANGE        | DOWN            | NOCHANGE        | NOCHANGE        | DOWN            |
| DOWN            | DOWN            | DOWN            | NOCHANGE        | DOWN            |
| UP              | DOWN            | NOCHANGE        | NOCHANGE        | NOCHANGE        |
| NOCHANGE        | DOWN            | NOCHANGE        | NOCHANGE        | NOCHANGE        |
| NOCHANGE        | NOCHANGE        | DOWN            | NOCHANGE        | DOWN            |
| NOCHANGE        | NOCHANGE        | NOCHANGE        | NOCHANGE        | NOCHANGE        |
| NOCHANGE        | DOWN            | NOCHANGE        | NOCHANGE        | DOWN            |
| UP              | NOCHANGE        | UP              | NOCHANGE        | UP              |
| NOCHANGE        | NOCHANGE        | UP              | NOCHANGE        | NOCHANGE        |
| UP              | DOWN            | DOWN            | NOCHANGE        | NOCHANGE        |
| DOWN            | DOWN            | DOWN            | NOCHANGE        | DOWN            |
| DOWN            | DOWN            | DOWN            | NOCHANGE        | DOWN            |
| NOCHANGE        | NOCHANGE        | DOWN            | NOCHANGE        | DOWN            |
| NOCHANGE        | NOCHANGE        | NOCHANGE        | NOCHANGE        | UP              |
| NOCHANGE        | NOCHANGE        | NOCHANGE        | NOCHANGE        | NOCHANGE        |
| NOCHANGE        | DOWN            | NOCHANGE        | NOCHANGE        | NOCHANGE        |
| NOCHANGE        | NOCHANGE        | NOCHANGE        | NOCHANGE        | NOCHANGE        |
| NOCHANGE        | NOCHANGE        | NOCHANGE        | NOCHANGE        | NOCHANGE        |
| NOCHANGE        | NOCHANGE        | DOWN            | NOCHANGE        | DOWN            |

| TCGA-G6-A8L8-01 | TCGA-BP-4173-01 | TCGA-AK-3434-01 | TCGA-BP-4329-01 | TCGA-CZ-5462-01 |
|-----------------|-----------------|-----------------|-----------------|-----------------|
| NOCHANGE        | NOCHANGE        | NOCHANGE        | NOCHANGE        | UP              |
| UP              | UP              | UP              | UP              | UP              |
| NOCHANGE        | NOCHANGE        | NOCHANGE        | NOCHANGE        | NOCHANGE        |
| NOCHANGE        | DOWN            | DOWN            | NOCHANGE        | NOCHANGE        |
| DOWN            | UP              | NOCHANGE        | NOCHANGE        | UP              |
| NOCHANGE        | NOCHANGE        | NOCHANGE        | NOCHANGE        | NOCHANGE        |
| DOWN            | DOWN            | NOCHANGE        | DOWN            | NOCHANGE        |
| DOWN            | NOCHANGE        | NOCHANGE        | NOCHANGE        | DOWN            |
| DOWN            | NOCHANGE        | NOCHANGE        | DOWN            | NOCHANGE        |
| NOCHANGE        | NOCHANGE        | NOCHANGE        | DOWN            | NOCHANGE        |
| NOCHANGE        | DOWN            | NOCHANGE        | NOCHANGE        | NOCHANGE        |
| NOCHANGE        | DOWN            | NOCHANGE        | DOWN            | DOWN            |
| NOCHANGE        | NOCHANGE        | NOCHANGE        | NOCHANGE        | NOCHANGE        |
| DOWN            | NOCHANGE        | DOWN            | NOCHANGE        | UP              |
| DOWN            | NOCHANGE        | DOWN            | DOWN            | DOWN            |
| NOCHANGE        | NOCHANGE        | NOCHANGE        | NOCHANGE        | NOCHANGE        |
| NOCHANGE        | UP              | NOCHANGE        | NOCHANGE        | NOCHANGE        |
| UP              | DOWN            | NOCHANGE        | NOCHANGE        | UP              |
| NOCHANGE        | NOCHANGE        | NOCHANGE        | NOCHANGE        | NOCHANGE        |
| NOCHANGE        | DOWN            | NOCHANGE        | NOCHANGE        | UP              |
| NOCHANGE        | UP              | NOCHANGE        | NOCHANGE        | UP              |
| NOCHANGE        | NOCHANGE        | NOCHANGE        | NOCHANGE        | NOCHANGE        |
| DOWN            | NOCHANGE        | DOWN            | NOCHANGE        | UP              |
| NOCHANGE        | DOWN            | NOCHANGE        | NOCHANGE        | DOWN            |
| DOWN            | DOWN            | DOWN            | NOCHANGE        | NOCHANGE        |
| DOWN            | DOWN            | NOCHANGE        | NOCHANGE        | NOCHANGE        |
| NOCHANGE        | NOCHANGE        | NOCHANGE        | NOCHANGE        | NOCHANGE        |
| NOCHANGE        | NOCHANGE        | NOCHANGE        | NOCHANGE        | NOCHANGE        |
| NOCHANGE        | NOCHANGE        | NOCHANGE        | NOCHANGE        | NOCHANGE        |
| NOCHANGE        | NOCHANGE        | NOCHANGE        | NOCHANGE        | NOCHANGE        |
| NOCHANGE        | NOCHANGE        | NOCHANGE        | NOCHANGE        | NOCHANGE        |
| DOWN            | DOWN            | DOWN            | DOWN            | DOWN            |

| TCGA-B0-4706-01. | TCGA-CJ-4920-01. | TCGA-B8-A54I-01. | TCGA-CJ-4893-01. | TCGA-BP-4960-01. |
|------------------|------------------|------------------|------------------|------------------|
| NOCHANGE         | NOCHANGE         | NOCHANGE         | NOCHANGE         | NOCHANGE         |
| UP               | UP               | UP               | UP               | UP               |
| NOCHANGE         | NOCHANGE         | NOCHANGE         | NOCHANGE         | NOCHANGE         |
| DOWN             | DOWN             | DOWN             | DOWN             | DOWN             |
| NOCHANGE         | NOCHANGE         | UP               | NOCHANGE         | UP               |
| NOCHANGE         | UP               | NOCHANGE         | NOCHANGE         | NOCHANGE         |
| NOCHANGE         | NOCHANGE         | DOWN             | DOWN             | DOWN             |
| NOCHANGE         | NOCHANGE         | NOCHANGE         | DOWN             | NOCHANGE         |
| DOWN             | NOCHANGE         | UP               | NOCHANGE         | NOCHANGE         |
| NOCHANGE         | NOCHANGE         | NOCHANGE         | NOCHANGE         | NOCHANGE         |
| NOCHANGE         | DOWN             | DOWN             | DOWN             | NOCHANGE         |
| NOCHANGE         | UP               | UP               | NOCHANGE         | NOCHANGE         |
| NOCHANGE         | NOCHANGE         | NOCHANGE         | NOCHANGE         | NOCHANGE         |
| NOCHANGE         | NOCHANGE         | DOWN             | NOCHANGE         | DOWN             |
| NOCHANGE         | DOWN             | DOWN             | DOWN             | DOWN             |
| NOCHANGE         | NOCHANGE         | DOWN             | UP               | DOWN             |
| NOCHANGE         | NOCHANGE         | NOCHANGE         | NOCHANGE         | NOCHANGE         |
| NOCHANGE         | DOWN             | NOCHANGE         | NOCHANGE         | DOWN             |
| NOCHANGE         | UP               | NOCHANGE         | NOCHANGE         | NOCHANGE         |
| DOWN             | DOWN             | NOCHANGE         | NOCHANGE         | NOCHANGE         |
| NOCHANGE         | NOCHANGE         | NOCHANGE         | UP               | NOCHANGE         |
| UP               | UP               | NOCHANGE         | NOCHANGE         | NOCHANGE         |
| UP               | NOCHANGE         | NOCHANGE         | NOCHANGE         | DOWN             |
| NOCHANGE         | NOCHANGE         | DOWN             | NOCHANGE         | DOWN             |
| DOWN             | DOWN             | DOWN             | NOCHANGE         | DOWN             |
| NOCHANGE         | NOCHANGE         | NOCHANGE         | NOCHANGE         | DOWN             |
| NOCHANGE         | NOCHANGE         | NOCHANGE         | NOCHANGE         | NOCHANGE         |
| NOCHANGE         | NOCHANGE         | NOCHANGE         | NOCHANGE         | NOCHANGE         |
| NOCHANGE         | NOCHANGE         | NOCHANGE         | NOCHANGE         | NOCHANGE         |
| NOCHANGE         | NOCHANGE         | DOWN             | NOCHANGE         | DOWN             |
| NOCHANGE         | NOCHANGE         | NOCHANGE         | NOCHANGE         | NOCHANGE         |
| DOWN             | DOWN             | DOWN             | NOCHANGE         | DOWN             |

| TCGA-B2-3924-01 | TCGA-B2-3923-01 | TCGA-BP-5185-01 | TCGA-A3-3357-01 | TCGA-A3-A8CQ-0 |
|-----------------|-----------------|-----------------|-----------------|----------------|
| NOCHANGE        | DOWN            | NOCHANGE        | UP              | NOCHANGE       |
| UP              | NOCHANGE        | UP              | UP              | UP             |
| NOCHANGE        | NOCHANGE        | NOCHANGE        | NOCHANGE        | NOCHANGE       |
| DOWN            | DOWN            | DOWN            | DOWN            | DOWN           |
| NOCHANGE        | NOCHANGE        | DOWN            | UP              | DOWN           |
| NOCHANGE        | NOCHANGE        | DOWN            | NOCHANGE        | UP             |
| DOWN            | NOCHANGE        | DOWN            | DOWN            | DOWN           |
| NOCHANGE        | DOWN            | NOCHANGE        | NOCHANGE        | NOCHANGE       |
| DOWN            | NOCHANGE        | DOWN            | UP              | DOWN           |
| NOCHANGE        | UP              | NOCHANGE        | NOCHANGE        | NOCHANGE       |
| NOCHANGE        | DOWN            | UP              | NOCHANGE        | NOCHANGE       |
| NOCHANGE        | UP              | DOWN            | UP              | UP             |
| NOCHANGE        | NOCHANGE        | NOCHANGE        | NOCHANGE        | NOCHANGE       |
| NOCHANGE        | DOWN            | DOWN            | NOCHANGE        | NOCHANGE       |
| DOWN            | DOWN            | DOWN            | DOWN            | NOCHANGE       |
| NOCHANGE        | NOCHANGE        | DOWN            | NOCHANGE        | NOCHANGE       |
| NOCHANGE        | NOCHANGE        | DOWN            | NOCHANGE        | NOCHANGE       |
| NOCHANGE        | DOWN            | NOCHANGE        | NOCHANGE        | UP             |
| NOCHANGE        | NOCHANGE        | DOWN            | DOWN            | DOWN           |
| NOCHANGE        | NOCHANGE        | DOWN            | NOCHANGE        | NOCHANGE       |
| NOCHANGE        | DOWN            | DOWN            | DOWN            | DOWN           |
| UP              | NOCHANGE        | NOCHANGE        | UP              | NOCHANGE       |
| NOCHANGE        | NOCHANGE        | NOCHANGE        | NOCHANGE        | NOCHANGE       |
| NOCHANGE        | NOCHANGE        | DOWN            | NOCHANGE        | NOCHANGE       |
| NOCHANGE        | NOCHANGE        | NOCHANGE        | DOWN            | DOWN           |
| NOCHANGE        | NOCHANGE        | DOWN            | NOCHANGE        | NOCHANGE       |
| NOCHANGE        | DOWN            | DOWN            | DOWN            | DOWN           |
| NOCHANGE        | NOCHANGE        | NOCHANGE        | NOCHANGE        | NOCHANGE       |
| NOCHANGE        | NOCHANGE        | NOCHANGE        | NOCHANGE        | NOCHANGE       |
| NOCHANGE        | NOCHANGE        | DOWN            | NOCHANGE        | NOCHANGE       |
| NOCHANGE        | NOCHANGE        | NOCHANGE        | NOCHANGE        | NOCHANGE       |
| DOWN            | UP              | DOWN            | NOCHANGE        | DOWN           |

| TCGA-BP-5176-01 | TCGA-BP-4160-01 | TCGA-B2-3924-01 | TCGA-B0-4822-01 | TCGA-A3-3328-01 |
|-----------------|-----------------|-----------------|-----------------|-----------------|
| NOCHANGE        | NOCHANGE        | NOCHANGE        | NOCHANGE        | DOWN            |
| UP              | UP              | UP              | UP              | NOCHANGE        |
| NOCHANGE        | NOCHANGE        | NOCHANGE        | NOCHANGE        | NOCHANGE        |
| DOWN            | DOWN            | DOWN            | DOWN            | DOWN            |
| NOCHANGE        | NOCHANGE        | UP              | NOCHANGE        | NOCHANGE        |
| UP              | NOCHANGE        | NOCHANGE        | NOCHANGE        | NOCHANGE        |
| DOWN            | DOWN            | NOCHANGE        | NOCHANGE        | DOWN            |
| NOCHANGE        | NOCHANGE        | NOCHANGE        | NOCHANGE        | DOWN            |
| DOWN            | NOCHANGE        | NOCHANGE        | NOCHANGE        | DOWN            |
| NOCHANGE        | NOCHANGE        | NOCHANGE        | NOCHANGE        | UP              |
| NOCHANGE        | DOWN            | DOWN            | UP              | NOCHANGE        |
| NOCHANGE        | NOCHANGE        | NOCHANGE        | NOCHANGE        | UP              |
| NOCHANGE        | NOCHANGE        | NOCHANGE        | NOCHANGE        | NOCHANGE        |
| NOCHANGE        | NOCHANGE        | NOCHANGE        | NOCHANGE        | NOCHANGE        |
| DOWN            | DOWN            | NOCHANGE        | DOWN            | NOCHANGE        |
| NOCHANGE        | NOCHANGE        | DOWN            | NOCHANGE        | DOWN            |
| NOCHANGE        | NOCHANGE        | UP              | DOWN            | UP              |
| NOCHANGE        | NOCHANGE        | UP              | DOWN            | NOCHANGE        |
| NOCHANGE        | DOWN            | NOCHANGE        | DOWN            | DOWN            |
| NOCHANGE        | NOCHANGE        | NOCHANGE        | NOCHANGE        | DOWN            |
| DOWN            | DOWN            | NOCHANGE        | DOWN            | DOWN            |
| NOCHANGE        | UP              | UP              | NOCHANGE        | NOCHANGE        |
| NOCHANGE        | NOCHANGE        | NOCHANGE        | NOCHANGE        | NOCHANGE        |
| DOWN            | NOCHANGE        | NOCHANGE        | DOWN            | DOWN            |
| NOCHANGE        | NOCHANGE        | DOWN            | NOCHANGE        | UP              |
| NOCHANGE        | NOCHANGE        | NOCHANGE        | DOWN            | NOCHANGE        |
| NOCHANGE        | NOCHANGE        | NOCHANGE        | NOCHANGE        | DOWN            |
| NOCHANGE        | NOCHANGE        | NOCHANGE        | NOCHANGE        | NOCHANGE        |
| NOCHANGE        | NOCHANGE        | NOCHANGE        | NOCHANGE        | NOCHANGE        |
| NOCHANGE        | NOCHANGE        | NOCHANGE        | NOCHANGE        | NOCHANGE        |
| NOCHANGE        | NOCHANGE        | NOCHANGE        | DOWN            | NOCHANGE        |
| NOCHANGE        | NOCHANGE        | NOCHANGE        | NOCHANGE        | NOCHANGE        |
| DOWN            | DOWN            | NOCHANGE        | DOWN            | NOCHANGE        |

| TCGA-CW-5583-01 | TCGA-B8-4148-01 | TCGA-BP-4959-01 | TCGA-B0-5097-01 | TCGA-CW-6090-01 |
|-----------------|-----------------|-----------------|-----------------|-----------------|
| NOCHANGE        | NOCHANGE        | NOCHANGE        | NOCHANGE        | NOCHANGE        |
| UP              | UP              | UP              | UP              | UP              |
| NOCHANGE        | NOCHANGE        | NOCHANGE        | NOCHANGE        | NOCHANGE        |
| DOWN            | DOWN            | DOWN            | DOWN            | DOWN            |
| NOCHANGE        | NOCHANGE        | UP              | UP              | NOCHANGE        |
| NOCHANGE        | NOCHANGE        | NOCHANGE        | UP              | DOWN            |
| NOCHANGE        | DOWN            | NOCHANGE        | DOWN            | DOWN            |
| NOCHANGE        | NOCHANGE        | DOWN            | NOCHANGE        | NOCHANGE        |
| NOCHANGE        | NOCHANGE        | UP              | UP              | NOCHANGE        |
| NOCHANGE        | NOCHANGE        | NOCHANGE        | DOWN            | DOWN            |
| NOCHANGE        | NOCHANGE        | DOWN            | DOWN            | NOCHANGE        |
| NOCHANGE        | NOCHANGE        | NOCHANGE        | NOCHANGE        | DOWN            |
| NOCHANGE        | NOCHANGE        | NOCHANGE        | NOCHANGE        | NOCHANGE        |
| NOCHANGE        | NOCHANGE        | NOCHANGE        | UP              | NOCHANGE        |
| NOCHANGE        | DOWN            | DOWN            | DOWN            | DOWN            |
| NOCHANGE        | NOCHANGE        | NOCHANGE        | NOCHANGE        | NOCHANGE        |
| NOCHANGE        | UP              | NOCHANGE        | NOCHANGE        | NOCHANGE        |
| DOWN            | DOWN            | DOWN            | DOWN            | NOCHANGE        |
| UP              | NOCHANGE        | NOCHANGE        | NOCHANGE        | NOCHANGE        |
| NOCHANGE        | DOWN            | NOCHANGE        | DOWN            | DOWN            |
| NOCHANGE        | UP              | UP              | UP              | UP              |
| UP              | UP              | NOCHANGE        | NOCHANGE        | NOCHANGE        |
| NOCHANGE        | DOWN            | NOCHANGE        | UP              | NOCHANGE        |
| DOWN            | DOWN            | NOCHANGE        | DOWN            | NOCHANGE        |
| NOCHANGE        | NOCHANGE        | NOCHANGE        | DOWN            | DOWN            |
| NOCHANGE        | DOWN            | NOCHANGE        | NOCHANGE        | NOCHANGE        |
| NOCHANGE        | NOCHANGE        | NOCHANGE        | NOCHANGE        | NOCHANGE        |
| NOCHANGE        | NOCHANGE        | NOCHANGE        | NOCHANGE        | NOCHANGE        |
| NOCHANGE        | NOCHANGE        | NOCHANGE        | NOCHANGE        | NOCHANGE        |
| NOCHANGE        | NOCHANGE        | DOWN            | NOCHANGE        | NOCHANGE        |
| NOCHANGE        | NOCHANGE        | DOWN            | NOCHANGE        | NOCHANGE        |
| DOWN            | DOWN            | DOWN            | DOWN            | DOWN            |

| TCGA-B2-4102-01 | TCGA-BP-4799-01 | TCGA-BP-4177-01 | TCGA-CZ-4858-01 | TCGA-AK-3450-01 |
|-----------------|-----------------|-----------------|-----------------|-----------------|
| NOCHANGE        | NOCHANGE        | NOCHANGE        | NOCHANGE        | NOCHANGE        |
| UP              | UP              | NOCHANGE        | NOCHANGE        | UP              |
| NOCHANGE        | NOCHANGE        | NOCHANGE        | DOWN            | NOCHANGE        |
| NOCHANGE        | DOWN            | DOWN            | DOWN            | DOWN            |
| UP              | UP              | DOWN            | NOCHANGE        | UP              |
| NOCHANGE        | UP              | DOWN            | DOWN            | UP              |
| NOCHANGE        | DOWN            | DOWN            | NOCHANGE        | DOWN            |
| DOWN            | NOCHANGE        | NOCHANGE        | NOCHANGE        | NOCHANGE        |
| NOCHANGE        | NOCHANGE        | NOCHANGE        | DOWN            | NOCHANGE        |
| NOCHANGE        | DOWN            | NOCHANGE        | DOWN            | NOCHANGE        |
| DOWN            | NOCHANGE        | UP              | NOCHANGE        | NOCHANGE        |
| NOCHANGE        | DOWN            | UP              | UP              | NOCHANGE        |
| NOCHANGE        | NOCHANGE        | NOCHANGE        | DOWN            | NOCHANGE        |
| NOCHANGE        | NOCHANGE        | NOCHANGE        | DOWN            | NOCHANGE        |
| DOWN            | NOCHANGE        | NOCHANGE        | DOWN            | DOWN            |
| NOCHANGE        | NOCHANGE        | NOCHANGE        | NOCHANGE        | NOCHANGE        |
| UP              | DOWN            | NOCHANGE        | NOCHANGE        | NOCHANGE        |
| DOWN            | DOWN            | NOCHANGE        | DOWN            | NOCHANGE        |
| UP              | DOWN            | NOCHANGE        | DOWN            | NOCHANGE        |
| NOCHANGE        | DOWN            | DOWN            | DOWN            | NOCHANGE        |
| UP              | NOCHANGE        | NOCHANGE        | NOCHANGE        | NOCHANGE        |
| NOCHANGE        | NOCHANGE        | NOCHANGE        | NOCHANGE        | UP              |
| NOCHANGE        | NOCHANGE        | DOWN            | DOWN            | DOWN            |
| DOWN            | DOWN            | NOCHANGE        | DOWN            | NOCHANGE        |
| NOCHANGE        | DOWN            | DOWN            | DOWN            | NOCHANGE        |
| NOCHANGE        | NOCHANGE        | NOCHANGE        | NOCHANGE        | NOCHANGE        |
| NOCHANGE        | NOCHANGE        | NOCHANGE        | NOCHANGE        | NOCHANGE        |
| NOCHANGE        | NOCHANGE        | NOCHANGE        | NOCHANGE        | NOCHANGE        |
| NOCHANGE        | NOCHANGE        | NOCHANGE        | NOCHANGE        | NOCHANGE        |
| NOCHANGE        | NOCHANGE        | NOCHANGE        | NOCHANGE        | NOCHANGE        |
| NOCHANGE        | NOCHANGE        | NOCHANGE        | DOWN            | NOCHANGE        |
| NOCHANGE        | NOCHANGE        | NOCHANGE        | DOWN            | NOCHANGE        |
| DOWN            | DOWN            | DOWN            | DOWN            | NOCHANGE        |

| TCGA-B0-5102-01. | TCGA-BP-4167-01. | TCGA-BP-4989-01. | TCGA-BP-5200-01. | TCGA-B0-4818-01. |
|------------------|------------------|------------------|------------------|------------------|
| NOCHANGE         | NOCHANGE         | NOCHANGE         | NOCHANGE         | NOCHANGE         |
| UP               | UP               | UP               | UP               | UP               |
| NOCHANGE         | NOCHANGE         | DOWN             | NOCHANGE         | NOCHANGE         |
| DOWN             | DOWN             | NOCHANGE         | DOWN             | NOCHANGE         |
| NOCHANGE         | NOCHANGE         | NOCHANGE         | NOCHANGE         | NOCHANGE         |
| DOWN             | DOWN             | NOCHANGE         | NOCHANGE         | NOCHANGE         |
| DOWN             | DOWN             | DOWN             | DOWN             | DOWN             |
| NOCHANGE         | NOCHANGE         | NOCHANGE         | NOCHANGE         | NOCHANGE         |
| NOCHANGE         | NOCHANGE         | NOCHANGE         | NOCHANGE         | NOCHANGE         |
| NOCHANGE         | NOCHANGE         | NOCHANGE         | NOCHANGE         | UP               |
| NOCHANGE         | NOCHANGE         | NOCHANGE         | DOWN             | NOCHANGE         |
| NOCHANGE         | NOCHANGE         | DOWN             | DOWN             | NOCHANGE         |
| NOCHANGE         | NOCHANGE         | NOCHANGE         | DOWN             | NOCHANGE         |
| NOCHANGE         | NOCHANGE         | NOCHANGE         | NOCHANGE         | NOCHANGE         |
| DOWN             | NOCHANGE         | DOWN             | DOWN             | DOWN             |
| NOCHANGE         | NOCHANGE         | NOCHANGE         | NOCHANGE         | NOCHANGE         |
| NOCHANGE         | DOWN             | NOCHANGE         | NOCHANGE         | NOCHANGE         |
| NOCHANGE         | NOCHANGE         | DOWN             | DOWN             | NOCHANGE         |
| NOCHANGE         | NOCHANGE         | NOCHANGE         | NOCHANGE         | NOCHANGE         |
| NOCHANGE         | DOWN             | DOWN             | NOCHANGE         | DOWN             |
| NOCHANGE         | UP               | UP               | UP               | NOCHANGE         |
| UP               | NOCHANGE         | NOCHANGE         | NOCHANGE         | UP               |
| DOWN             | NOCHANGE         | DOWN             | NOCHANGE         | DOWN             |
| NOCHANGE         | NOCHANGE         | DOWN             | DOWN             | NOCHANGE         |
| DOWN             | DOWN             | DOWN             | DOWN             | NOCHANGE         |
| DOWN             | NOCHANGE         | NOCHANGE         | NOCHANGE         | DOWN             |
| NOCHANGE         | NOCHANGE         | NOCHANGE         | NOCHANGE         | NOCHANGE         |
| NOCHANGE         | NOCHANGE         | NOCHANGE         | NOCHANGE         | NOCHANGE         |
| DOWN             | DOWN             | DOWN             | NOCHANGE         | NOCHANGE         |
| NOCHANGE         | NOCHANGE         | NOCHANGE         | NOCHANGE         | NOCHANGE         |
| DOWN             | DOWN             | DOWN             | DOWN             | DOWN             |



| TCGA-B0-4714-01. | TCGA-3Z-A93Z-01 | TCGA-DV-5574-01 | TCGA-BP-5194-01. | TCGA-BP-4961-01. |
|------------------|-----------------|-----------------|------------------|------------------|
| NOCHANGE         | NOCHANGE        | NOCHANGE        | NOCHANGE         | NOCHANGE         |
| UP               | UP              | UP              | UP               | UP               |
| NOCHANGE         | NOCHANGE        | NOCHANGE        | NOCHANGE         | NOCHANGE         |
| NOCHANGE         | NOCHANGE        | DOWN            | DOWN             | DOWN             |
| NOCHANGE         | NOCHANGE        | NOCHANGE        | NOCHANGE         | NOCHANGE         |
| NOCHANGE         | NOCHANGE        | NOCHANGE        | NOCHANGE         | NOCHANGE         |
| DOWN             | NOCHANGE        | DOWN            | DOWN             | NOCHANGE         |
| DOWN             | NOCHANGE        | NOCHANGE        | NOCHANGE         | NOCHANGE         |
| NOCHANGE         | DOWN            | NOCHANGE        | NOCHANGE         | NOCHANGE         |
| NOCHANGE         | NOCHANGE        | NOCHANGE        | NOCHANGE         | NOCHANGE         |
| NOCHANGE         | NOCHANGE        | NOCHANGE        | NOCHANGE         | NOCHANGE         |
| NOCHANGE         | NOCHANGE        | NOCHANGE        | NOCHANGE         | NOCHANGE         |
| NOCHANGE         | DOWN            | NOCHANGE        | DOWN             | NOCHANGE         |
| NOCHANGE         | NOCHANGE        | NOCHANGE        | NOCHANGE         | NOCHANGE         |
| NOCHANGE         | NOCHANGE        | NOCHANGE        | NOCHANGE         | NOCHANGE         |
| NOCHANGE         | NOCHANGE        | NOCHANGE        | NOCHANGE         | NOCHANGE         |
| NOCHANGE         | NOCHANGE        | NOCHANGE        | NOCHANGE         | NOCHANGE         |
| DOWN             | NOCHANGE        | NOCHANGE        | DOWN             | DOWN             |
| NOCHANGE         | NOCHANGE        | NOCHANGE        | NOCHANGE         | NOCHANGE         |
| NOCHANGE         | NOCHANGE        | NOCHANGE        | NOCHANGE         | NOCHANGE         |
| NOCHANGE         | NOCHANGE        | DOWN            | NOCHANGE         | DOWN             |
| NOCHANGE         | NOCHANGE        | NOCHANGE        | UP               | NOCHANGE         |
| DOWN             | DOWN            | DOWN            | DOWN             | NOCHANGE         |
| NOCHANGE         | NOCHANGE        | UP              | NOCHANGE         | NOCHANGE         |
| NOCHANGE         | NOCHANGE        | NOCHANGE        | NOCHANGE         | NOCHANGE         |
| DOWN             | DOWN            | NOCHANGE        | NOCHANGE         | NOCHANGE         |
| DOWN             | NOCHANGE        | DOWN            | NOCHANGE         | DOWN             |
| DOWN             | DOWN            | DOWN            | DOWN             | DOWN             |
| DOWN             | NOCHANGE        | NOCHANGE        | DOWN             | NOCHANGE         |
| NOCHANGE         | NOCHANGE        | NOCHANGE        | NOCHANGE         | NOCHANGE         |
| NOCHANGE         | NOCHANGE        | NOCHANGE        | NOCHANGE         | NOCHANGE         |
| DOWN             | NOCHANGE        | NOCHANGE        | NOCHANGE         | DOWN             |
| NOCHANGE         | NOCHANGE        | UP              | NOCHANGE         | NOCHANGE         |
| DOWN             | DOWN            | DOWN            | DOWN             | DOWN             |

| TCGA-BP-4963-01 | TCGA-AK-3460-01 | TCGA-B8-5545-01 | TCGA-BP-4165-01 | TCGA-DV-A4VX-0 |
|-----------------|-----------------|-----------------|-----------------|----------------|
| NOCHANGE        | NOCHANGE        | NOCHANGE        | NOCHANGE        | UP             |
| UP              | NOCHANGE        | UP              | UP              | UP             |
| NOCHANGE        | NOCHANGE        | NOCHANGE        | NOCHANGE        | NOCHANGE       |
| DOWN            | DOWN            | DOWN            | DOWN            | DOWN           |
| NOCHANGE        | NOCHANGE        | NOCHANGE        | NOCHANGE        | UP             |
| NOCHANGE        | NOCHANGE        | NOCHANGE        | NOCHANGE        | UP             |
| NOCHANGE        | DOWN            | NOCHANGE        | DOWN            | DOWN           |
| NOCHANGE        | NOCHANGE        | NOCHANGE        | NOCHANGE        | UP             |
| NOCHANGE        | NOCHANGE        | DOWN            | DOWN            | UP             |
| NOCHANGE        | NOCHANGE        | NOCHANGE        | NOCHANGE        | NOCHANGE       |
| DOWN            | NOCHANGE        | NOCHANGE        | UP              | NOCHANGE       |
| NOCHANGE        | NOCHANGE        | NOCHANGE        | DOWN            | DOWN           |
| NOCHANGE        | NOCHANGE        | NOCHANGE        | NOCHANGE        | NOCHANGE       |
| NOCHANGE        | NOCHANGE        | NOCHANGE        | NOCHANGE        | NOCHANGE       |
| DOWN            | DOWN            | NOCHANGE        | NOCHANGE        | DOWN           |
| UP              | NOCHANGE        | NOCHANGE        | NOCHANGE        | NOCHANGE       |
| NOCHANGE        | NOCHANGE        | NOCHANGE        | NOCHANGE        | DOWN           |
| DOWN            | DOWN            | DOWN            | NOCHANGE        | NOCHANGE       |
| UP              | NOCHANGE        | NOCHANGE        | NOCHANGE        | UP             |
| DOWN            | NOCHANGE        | DOWN            | DOWN            | UP             |
| UP              | NOCHANGE        | UP              | NOCHANGE        | NOCHANGE       |
| NOCHANGE        | NOCHANGE        | UP              | NOCHANGE        | NOCHANGE       |
| NOCHANGE        | DOWN            | NOCHANGE        | DOWN            | UP             |
| DOWN            | DOWN            | NOCHANGE        | NOCHANGE        | NOCHANGE       |
| NOCHANGE        | DOWN            | DOWN            | NOCHANGE        | DOWN           |
| DOWN            | NOCHANGE        | NOCHANGE        | NOCHANGE        | UP             |
| NOCHANGE        | UP              | NOCHANGE        | NOCHANGE        | NOCHANGE       |
| NOCHANGE        | NOCHANGE        | NOCHANGE        | NOCHANGE        | NOCHANGE       |
| NOCHANGE        | NOCHANGE        | NOCHANGE        | DOWN            | NOCHANGE       |
| NOCHANGE        | NOCHANGE        | NOCHANGE        | NOCHANGE        | NOCHANGE       |
| NOCHANGE        | NOCHANGE        | DOWN            | DOWN            | UP             |

| TCGA-B0-4846-01. | TCGA-CZ-5453-01 | TCGA-B0-5095-01. | TCGA-BP-4972-01. | TCGA-B0-4712-01. |
|------------------|-----------------|------------------|------------------|------------------|
| NOCHANGE         | NOCHANGE        | NOCHANGE         | NOCHANGE         | NOCHANGE         |
| UP               | UP              | UP               | UP               | UP               |
| NOCHANGE         | NOCHANGE        | NOCHANGE         | NOCHANGE         | NOCHANGE         |
| NOCHANGE         | DOWN            | DOWN             | DOWN             | DOWN             |
| UP               | NOCHANGE        | NOCHANGE         | NOCHANGE         | UP               |
| NOCHANGE         | NOCHANGE        | NOCHANGE         | NOCHANGE         | NOCHANGE         |
| DOWN             | DOWN            | DOWN             | NOCHANGE         | NOCHANGE         |
| NOCHANGE         | NOCHANGE        | NOCHANGE         | NOCHANGE         | UP               |
| NOCHANGE         | NOCHANGE        | NOCHANGE         | NOCHANGE         | NOCHANGE         |
| NOCHANGE         | NOCHANGE        | NOCHANGE         | NOCHANGE         | DOWN             |
| NOCHANGE         | NOCHANGE        | DOWN             | DOWN             | NOCHANGE         |
| NOCHANGE         | DOWN            | NOCHANGE         | DOWN             | NOCHANGE         |
| NOCHANGE         | NOCHANGE        | NOCHANGE         | NOCHANGE         | NOCHANGE         |
| NOCHANGE         | NOCHANGE        | NOCHANGE         | NOCHANGE         | NOCHANGE         |
| NOCHANGE         | NOCHANGE        | NOCHANGE         | NOCHANGE         | NOCHANGE         |
| DOWN             | DOWN            | NOCHANGE         | DOWN             | NOCHANGE         |
| UP               | NOCHANGE        | NOCHANGE         | NOCHANGE         | NOCHANGE         |
| UP               | NOCHANGE        | NOCHANGE         | NOCHANGE         | NOCHANGE         |
| DOWN             | NOCHANGE        | DOWN             | DOWN             | DOWN             |
| UP               | NOCHANGE        | NOCHANGE         | NOCHANGE         | NOCHANGE         |
| DOWN             | NOCHANGE        | DOWN             | DOWN             | NOCHANGE         |
| UP               | NOCHANGE        | NOCHANGE         | UP               | NOCHANGE         |
| NOCHANGE         | NOCHANGE        | UP               | NOCHANGE         | NOCHANGE         |
| NOCHANGE         | NOCHANGE        | NOCHANGE         | UP               | UP               |
| DOWN             | NOCHANGE        | DOWN             | DOWN             | DOWN             |
| NOCHANGE         | NOCHANGE        | DOWN             | DOWN             | DOWN             |
| DOWN             | DOWN            | DOWN             | NOCHANGE         | NOCHANGE         |
| NOCHANGE         | NOCHANGE        | NOCHANGE         | NOCHANGE         | NOCHANGE         |
| NOCHANGE         | NOCHANGE        | NOCHANGE         | NOCHANGE         | NOCHANGE         |
| NOCHANGE         | NOCHANGE        | NOCHANGE         | NOCHANGE         | NOCHANGE         |
| NOCHANGE         | NOCHANGE        | DOWN             | NOCHANGE         | DOWN             |
| NOCHANGE         | NOCHANGE        | NOCHANGE         | NOCHANGE         | NOCHANGE         |
| DOWN             | DOWN            | DOWN             | DOWN             | DOWN             |

| TCGA-BP-4164-01 | TCGA-CZ-5454-01 | TCGA-BP-5202-01 | TCGA-CZ-5470-01 | TCGA-CJ-4902-01 |
|-----------------|-----------------|-----------------|-----------------|-----------------|
| NOCHANGE        | NOCHANGE        | NOCHANGE        | UP              | NOCHANGE        |
| UP              | UP              | UP              | UP              | UP              |
| NOCHANGE        | NOCHANGE        | NOCHANGE        | NOCHANGE        | NOCHANGE        |
| DOWN            | DOWN            | DOWN            | DOWN            | DOWN            |
| NOCHANGE        | UP              | NOCHANGE        | NOCHANGE        | NOCHANGE        |
| UP              | NOCHANGE        | NOCHANGE        | NOCHANGE        | NOCHANGE        |
| DOWN            | DOWN            | DOWN            | NOCHANGE        | DOWN            |
| NOCHANGE        | NOCHANGE        | NOCHANGE        | DOWN            | NOCHANGE        |
| NOCHANGE        | NOCHANGE        | NOCHANGE        | NOCHANGE        | NOCHANGE        |
| NOCHANGE        | NOCHANGE        | NOCHANGE        | NOCHANGE        | NOCHANGE        |
| DOWN            | NOCHANGE        | DOWN            | NOCHANGE        | NOCHANGE        |
| DOWN            | DOWN            | NOCHANGE        | DOWN            | NOCHANGE        |
| NOCHANGE        | NOCHANGE        | NOCHANGE        | NOCHANGE        | NOCHANGE        |
| NOCHANGE        | NOCHANGE        | NOCHANGE        | NOCHANGE        | NOCHANGE        |
| NOCHANGE        | NOCHANGE        | NOCHANGE        | NOCHANGE        | NOCHANGE        |
| DOWN            | NOCHANGE        | DOWN            | NOCHANGE        | DOWN            |
| NOCHANGE        | NOCHANGE        | NOCHANGE        | NOCHANGE        | NOCHANGE        |
| NOCHANGE        | NOCHANGE        | NOCHANGE        | NOCHANGE        | NOCHANGE        |
| DOWN            | NOCHANGE        | NOCHANGE        | UP              | NOCHANGE        |
| NOCHANGE        | NOCHANGE        | NOCHANGE        | NOCHANGE        | NOCHANGE        |
| DOWN            | NOCHANGE        | DOWN            | DOWN            | DOWN            |
| NOCHANGE        | UP              | NOCHANGE        | NOCHANGE        | NOCHANGE        |
| NOCHANGE        | NOCHANGE        | NOCHANGE        | NOCHANGE        | NOCHANGE        |
| NOCHANGE        | NOCHANGE        | NOCHANGE        | NOCHANGE        | NOCHANGE        |
| NOCHANGE        | NOCHANGE        | NOCHANGE        | NOCHANGE        | DOWN            |
| NOCHANGE        | NOCHANGE        | NOCHANGE        | NOCHANGE        | DOWN            |
| NOCHANGE        | NOCHANGE        | NOCHANGE        | NOCHANGE        | NOCHANGE        |
| NOCHANGE        | NOCHANGE        | NOCHANGE        | NOCHANGE        | NOCHANGE        |
| NOCHANGE        | NOCHANGE        | NOCHANGE        | NOCHANGE        | NOCHANGE        |
| NOCHANGE        | NOCHANGE        | NOCHANGE        | NOCHANGE        | DOWN            |
| NOCHANGE        | NOCHANGE        | NOCHANGE        | NOCHANGE        | NOCHANGE        |
| DOWN            | DOWN            | NOCHANGE        | NOCHANGE        | DOWN            |

| TCGA-CJ-4905-01 | TCGA-B0-5075-01 | TCGA-BP-4798-01 | TCGA-CJ-4882-01 | TCGA-B0-5706-01 |
|-----------------|-----------------|-----------------|-----------------|-----------------|
| NOCHANGE        | UP              | NOCHANGE        | NOCHANGE        | NOCHANGE        |
| NOCHANGE        | UP              | UP              | UP              | NOCHANGE        |
| NOCHANGE        | NOCHANGE        | NOCHANGE        | NOCHANGE        | NOCHANGE        |
| DOWN            | DOWN            | DOWN            | DOWN            | DOWN            |
| NOCHANGE        | UP              | UP              | NOCHANGE        | UP              |
| UP              | NOCHANGE        | NOCHANGE        | NOCHANGE        | NOCHANGE        |
| DOWN            | DOWN            | DOWN            | NOCHANGE        | DOWN            |
| NOCHANGE        | NOCHANGE        | NOCHANGE        | NOCHANGE        | NOCHANGE        |
| DOWN            | UP              | NOCHANGE        | UP              | NOCHANGE        |
| NOCHANGE        | NOCHANGE        | DOWN            | NOCHANGE        | DOWN            |
| DOWN            | NOCHANGE        | NOCHANGE        | NOCHANGE        | NOCHANGE        |
| DOWN            | NOCHANGE        | DOWN            | UP              | NOCHANGE        |
| NOCHANGE        | NOCHANGE        | NOCHANGE        | NOCHANGE        | NOCHANGE        |
| NOCHANGE        | NOCHANGE        | NOCHANGE        | NOCHANGE        | NOCHANGE        |
| DOWN            | DOWN            | DOWN            | NOCHANGE        | NOCHANGE        |
| NOCHANGE        | NOCHANGE        | NOCHANGE        | NOCHANGE        | NOCHANGE        |
| UP              | NOCHANGE        | NOCHANGE        | NOCHANGE        | NOCHANGE        |
| DOWN            | DOWN            | DOWN            | DOWN            | DOWN            |
| UP              | UP              | NOCHANGE        | NOCHANGE        | NOCHANGE        |
| DOWN            | NOCHANGE        | NOCHANGE        | DOWN            | DOWN            |
| NOCHANGE        | UP              | UP              | NOCHANGE        | NOCHANGE        |
| UP              | NOCHANGE        | UP              | NOCHANGE        | UP              |
| NOCHANGE        | UP              | DOWN            | DOWN            | NOCHANGE        |
| DOWN            | NOCHANGE        | DOWN            | NOCHANGE        | DOWN            |
| NOCHANGE        | NOCHANGE        | DOWN            | DOWN            | DOWN            |
| NOCHANGE        | NOCHANGE        | DOWN            | DOWN            | DOWN            |
| NOCHANGE        | NOCHANGE        | DOWN            | DOWN            | DOWN            |
| NOCHANGE        | NOCHANGE        | NOCHANGE        | UP              | NOCHANGE        |
| NOCHANGE        | NOCHANGE        | NOCHANGE        | NOCHANGE        | NOCHANGE        |
| NOCHANGE        | NOCHANGE        | DOWN            | NOCHANGE        | NOCHANGE        |
| DOWN            | NOCHANGE        | DOWN            | NOCHANGE        | NOCHANGE        |
| DOWN            | NOCHANGE        | DOWN            | DOWN            | DOWN            |

| TCGA-CJ-4891-01 | TCGA-CZ-5988-01 | TCGA-AK-3440-01 | TCGA-AK-3453-01 | TCGA-B0-5697-01 |
|-----------------|-----------------|-----------------|-----------------|-----------------|
| UP              | NOCHANGE        | DOWN            | NOCHANGE        | NOCHANGE        |
| UP              | UP              | NOCHANGE        | UP              | NOCHANGE        |
| NOCHANGE        | NOCHANGE        | NOCHANGE        | NOCHANGE        | NOCHANGE        |
| DOWN            | DOWN            | DOWN            | DOWN            | DOWN            |
| UP              | NOCHANGE        | NOCHANGE        | NOCHANGE        | UP              |
| NOCHANGE        | NOCHANGE        | NOCHANGE        | NOCHANGE        | NOCHANGE        |
| DOWN            | DOWN            | NOCHANGE        | NOCHANGE        | NOCHANGE        |
| UP              | NOCHANGE        | NOCHANGE        | NOCHANGE        | NOCHANGE        |
| NOCHANGE        | UP              | NOCHANGE        | NOCHANGE        | UP              |
| DOWN            | DOWN            | UP              | NOCHANGE        | NOCHANGE        |
| NOCHANGE        | NOCHANGE        | NOCHANGE        | UP              | NOCHANGE        |
| NOCHANGE        | UP              | DOWN            | UP              | NOCHANGE        |
| NOCHANGE        | NOCHANGE        | NOCHANGE        | NOCHANGE        | NOCHANGE        |
| NOCHANGE        | NOCHANGE        | DOWN            | DOWN            | NOCHANGE        |
| NOCHANGE        | DOWN            | DOWN            | NOCHANGE        | NOCHANGE        |
| NOCHANGE        | NOCHANGE        | NOCHANGE        | NOCHANGE        | NOCHANGE        |
| NOCHANGE        | UP              | NOCHANGE        | NOCHANGE        | NOCHANGE        |
| NOCHANGE        | DOWN            | DOWN            | NOCHANGE        | DOWN            |
| DOWN            | UP              | NOCHANGE        | NOCHANGE        | NOCHANGE        |
| NOCHANGE        | NOCHANGE        | DOWN            | DOWN            | NOCHANGE        |
| NOCHANGE        | NOCHANGE        | NOCHANGE        | NOCHANGE        | UP              |
| NOCHANGE        | UP              | NOCHANGE        | NOCHANGE        | NOCHANGE        |
| UP              | NOCHANGE        | UP              | DOWN            | NOCHANGE        |
| DOWN            | DOWN            | UP              | NOCHANGE        | NOCHANGE        |
| DOWN            | DOWN            | NOCHANGE        | DOWN            | DOWN            |
| UP              | NOCHANGE        | NOCHANGE        | DOWN            | NOCHANGE        |
| NOCHANGE        | NOCHANGE        | NOCHANGE        | UP              | NOCHANGE        |
| NOCHANGE        | NOCHANGE        | NOCHANGE        | NOCHANGE        | NOCHANGE        |
| DOWN            | NOCHANGE        | NOCHANGE        | DOWN            | NOCHANGE        |
| NOCHANGE        | NOCHANGE        | NOCHANGE        | NOCHANGE        | NOCHANGE        |
| UP              | DOWN            | NOCHANGE        | DOWN            | NOCHANGE        |

| TCGA-B0-4841-01 | TCGA-CJ-5679-01 | TCGA-B0-4845-01 | TCGA-CZ-5465-01 | TCGA-CJ-5686-01 |
|-----------------|-----------------|-----------------|-----------------|-----------------|
| NOCHANGE        | NOCHANGE        | NOCHANGE        | NOCHANGE        | UP              |
| NOCHANGE        | UP              | UP              | UP              | UP              |
| NOCHANGE        | NOCHANGE        | NOCHANGE        | NOCHANGE        | NOCHANGE        |
| DOWN            | DOWN            | NOCHANGE        | DOWN            | NOCHANGE        |
| DOWN            | NOCHANGE        | NOCHANGE        | NOCHANGE        | UP              |
| DOWN            | UP              | NOCHANGE        | UP              | UP              |
| DOWN            | NOCHANGE        | NOCHANGE        | DOWN            | DOWN            |
| NOCHANGE        | NOCHANGE        | NOCHANGE        | NOCHANGE        | NOCHANGE        |
| NOCHANGE        | NOCHANGE        | NOCHANGE        | NOCHANGE        | NOCHANGE        |
| NOCHANGE        | NOCHANGE        | NOCHANGE        | NOCHANGE        | DOWN            |
| UP              | NOCHANGE        | NOCHANGE        | DOWN            | NOCHANGE        |
| NOCHANGE        | DOWN            | NOCHANGE        | NOCHANGE        | DOWN            |
| NOCHANGE        | NOCHANGE        | NOCHANGE        | NOCHANGE        | NOCHANGE        |
| DOWN            | DOWN            | NOCHANGE        | NOCHANGE        | NOCHANGE        |
| DOWN            | DOWN            | DOWN            | DOWN            | DOWN            |
| DOWN            | DOWN            | NOCHANGE        | NOCHANGE        | UP              |
| DOWN            | DOWN            | NOCHANGE        | NOCHANGE        | NOCHANGE        |
| NOCHANGE        | NOCHANGE        | NOCHANGE        | DOWN            | DOWN            |
| DOWN            | NOCHANGE        | NOCHANGE        | UP              | NOCHANGE        |
| DOWN            | NOCHANGE        | DOWN            | DOWN            | UP              |
| NOCHANGE        | NOCHANGE        | NOCHANGE        | NOCHANGE        | UP              |
| NOCHANGE        | NOCHANGE        | NOCHANGE        | NOCHANGE        | NOCHANGE        |
| DOWN            | DOWN            | DOWN            | NOCHANGE        | UP              |
| DOWN            | NOCHANGE        | NOCHANGE        | NOCHANGE        | DOWN            |
| DOWN            | NOCHANGE        | NOCHANGE        | NOCHANGE        | NOCHANGE        |
| NOCHANGE        | NOCHANGE        | NOCHANGE        | NOCHANGE        | NOCHANGE        |
| UP              | NOCHANGE        | UP              | NOCHANGE        | NOCHANGE        |
| NOCHANGE        | NOCHANGE        | NOCHANGE        | NOCHANGE        | NOCHANGE        |
| DOWN            | DOWN            | NOCHANGE        | NOCHANGE        | NOCHANGE        |
| NOCHANGE        | NOCHANGE        | NOCHANGE        | NOCHANGE        | NOCHANGE        |
| DOWN            | NOCHANGE        | DOWN            | DOWN            | NOCHANGE        |

|                  |                  |                  |                  |                  |
|------------------|------------------|------------------|------------------|------------------|
| TCGA-BP-4345-01. | TCGA-B0-5693-01. | TCGA-B0-4838-01. | TCGA-B8-5549-01. | TCGA-CJ-4876-01/ |
| NOCHANGE         | NOCHANGE         | NOCHANGE         | NOCHANGE         | NOCHANGE         |
| UP               | UP               | UP               | UP               | UP               |
| NOCHANGE         | NOCHANGE         | NOCHANGE         | NOCHANGE         | NOCHANGE         |
| DOWN             | DOWN             | NOCHANGE         | DOWN             | DOWN             |
| NOCHANGE         | NOCHANGE         | NOCHANGE         | NOCHANGE         | NOCHANGE         |
| NOCHANGE         | NOCHANGE         | NOCHANGE         | NOCHANGE         | NOCHANGE         |
| DOWN             | NOCHANGE         | DOWN             | DOWN             | DOWN             |
| NOCHANGE         | NOCHANGE         | NOCHANGE         | NOCHANGE         | NOCHANGE         |
| NOCHANGE         | DOWN             | NOCHANGE         | NOCHANGE         | NOCHANGE         |
| NOCHANGE         | NOCHANGE         | NOCHANGE         | NOCHANGE         | NOCHANGE         |
| NOCHANGE         | NOCHANGE         | DOWN             | DOWN             | UP               |
| NOCHANGE         | NOCHANGE         | DOWN             | DOWN             | NOCHANGE         |
| DOWN             | NOCHANGE         | NOCHANGE         | NOCHANGE         | NOCHANGE         |
| NOCHANGE         | NOCHANGE         | NOCHANGE         | NOCHANGE         | DOWN             |
| NOCHANGE         | DOWN             | NOCHANGE         | DOWN             | NOCHANGE         |
| NOCHANGE         | NOCHANGE         | NOCHANGE         | NOCHANGE         | NOCHANGE         |
| NOCHANGE         | UP               | UP               | NOCHANGE         | NOCHANGE         |
| DOWN             | NOCHANGE         | DOWN             | NOCHANGE         | NOCHANGE         |
| NOCHANGE         | NOCHANGE         | NOCHANGE         | NOCHANGE         | NOCHANGE         |
| DOWN             | DOWN             | NOCHANGE         | NOCHANGE         | NOCHANGE         |
| UP               | NOCHANGE         | UP               | NOCHANGE         | NOCHANGE         |
| UP               | NOCHANGE         | UP               | UP               | NOCHANGE         |
| NOCHANGE         | NOCHANGE         | NOCHANGE         | NOCHANGE         | DOWN             |
| DOWN             | NOCHANGE         | DOWN             | NOCHANGE         | NOCHANGE         |
| DOWN             | NOCHANGE         | NOCHANGE         | NOCHANGE         | DOWN             |
| NOCHANGE         | NOCHANGE         | NOCHANGE         | NOCHANGE         | NOCHANGE         |
| NOCHANGE         | NOCHANGE         | NOCHANGE         | NOCHANGE         | NOCHANGE         |
| NOCHANGE         | NOCHANGE         | NOCHANGE         | NOCHANGE         | NOCHANGE         |
| NOCHANGE         | NOCHANGE         | NOCHANGE         | NOCHANGE         | NOCHANGE         |
| DOWN             | NOCHANGE         | NOCHANGE         | NOCHANGE         | NOCHANGE         |
| NOCHANGE         | NOCHANGE         | DOWN             | NOCHANGE         | NOCHANGE         |
| DOWN             | DOWN             | DOWN             | DOWN             | DOWN             |



| TCGA-BP-4337-01. | TCGA-BP-4985-01. | TCGA-A3-3374-01 | TCGA-A3-3373-01 | TCGA-B0-5700-01. |
|------------------|------------------|-----------------|-----------------|------------------|
| NOCHANGE         | NOCHANGE         | NOCHANGE        | NOCHANGE        | NOCHANGE         |
| UP               | UP               | UP              | UP              | UP               |
| NOCHANGE         | NOCHANGE         | NOCHANGE        | NOCHANGE        | NOCHANGE         |
| DOWN             | DOWN             | DOWN            | DOWN            | DOWN             |
| NOCHANGE         | NOCHANGE         | NOCHANGE        | UP              | NOCHANGE         |
| NOCHANGE         | UP               | NOCHANGE        | UP              | NOCHANGE         |
| NOCHANGE         | NOCHANGE         | UP              | NOCHANGE        | NOCHANGE         |
| NOCHANGE         | NOCHANGE         | NOCHANGE        | NOCHANGE        | NOCHANGE         |
| NOCHANGE         | UP               | NOCHANGE        | NOCHANGE        | NOCHANGE         |
| NOCHANGE         | DOWN             | UP              | NOCHANGE        | NOCHANGE         |
| NOCHANGE         | NOCHANGE         | DOWN            | DOWN            | NOCHANGE         |
| NOCHANGE         | UP               | UP              | DOWN            | NOCHANGE         |
| NOCHANGE         | NOCHANGE         | NOCHANGE        | NOCHANGE        | NOCHANGE         |
| NOCHANGE         | NOCHANGE         | DOWN            | NOCHANGE        | DOWN             |
| NOCHANGE         | DOWN             | DOWN            | DOWN            | NOCHANGE         |
| DOWN             | NOCHANGE         | UP              | UP              | NOCHANGE         |
| NOCHANGE         | DOWN             | NOCHANGE        | NOCHANGE        | NOCHANGE         |
| NOCHANGE         | NOCHANGE         | DOWN            | DOWN            | NOCHANGE         |
| NOCHANGE         | NOCHANGE         | DOWN            | NOCHANGE        | DOWN             |
| NOCHANGE         | NOCHANGE         | DOWN            | DOWN            | NOCHANGE         |
| NOCHANGE         | NOCHANGE         | DOWN            | DOWN            | NOCHANGE         |
| NOCHANGE         | NOCHANGE         | UP              | UP              | NOCHANGE         |
| NOCHANGE         | NOCHANGE         | NOCHANGE        | NOCHANGE        | NOCHANGE         |
| DOWN             | UP               | UP              | NOCHANGE        | DOWN             |
| NOCHANGE         | DOWN             | NOCHANGE        | DOWN            | NOCHANGE         |
| DOWN             | DOWN             | NOCHANGE        | NOCHANGE        | NOCHANGE         |
| DOWN             | NOCHANGE         | NOCHANGE        | NOCHANGE        | NOCHANGE         |
| UP               | NOCHANGE         | NOCHANGE        | NOCHANGE        | NOCHANGE         |
| NOCHANGE         | NOCHANGE         | NOCHANGE        | NOCHANGE        | NOCHANGE         |
| DOWN             | NOCHANGE         | NOCHANGE        | NOCHANGE        | NOCHANGE         |
| NOCHANGE         | NOCHANGE         | DOWN            | NOCHANGE        | NOCHANGE         |
| NOCHANGE         | NOCHANGE         | NOCHANGE        | DOWN            | NOCHANGE         |
| DOWN             | DOWN             | NOCHANGE        | DOWN            | DOWN             |

| TCGA-B4-5378-01. | TCGA-B0-5709-01. | TCGA-BP-4351-01. | TCGA-BP-4774-01. | TCGA-BP-4986-01. |
|------------------|------------------|------------------|------------------|------------------|
| DOWN             | NOCHANGE         | NOCHANGE         | NOCHANGE         | NOCHANGE         |
| NOCHANGE         | UP               | UP               | UP               | NOCHANGE         |
| NOCHANGE         | NOCHANGE         | NOCHANGE         | NOCHANGE         | NOCHANGE         |
| DOWN             | DOWN             | DOWN             | DOWN             | DOWN             |
| DOWN             | UP               | NOCHANGE         | NOCHANGE         | NOCHANGE         |
| DOWN             | NOCHANGE         | NOCHANGE         | UP               | NOCHANGE         |
| NOCHANGE         | NOCHANGE         | DOWN             | DOWN             | DOWN             |
| NOCHANGE         | NOCHANGE         | UP               | DOWN             | NOCHANGE         |
| UP               | NOCHANGE         | NOCHANGE         | NOCHANGE         | NOCHANGE         |
| NOCHANGE         | NOCHANGE         | NOCHANGE         | NOCHANGE         | DOWN             |
| NOCHANGE         | NOCHANGE         | NOCHANGE         | NOCHANGE         | NOCHANGE         |
| NOCHANGE         | NOCHANGE         | UP               | NOCHANGE         | UP               |
| NOCHANGE         | NOCHANGE         | NOCHANGE         | NOCHANGE         | NOCHANGE         |
| NOCHANGE         | UP               | DOWN             | DOWN             | NOCHANGE         |
| NOCHANGE         | NOCHANGE         | NOCHANGE         | DOWN             | DOWN             |
| NOCHANGE         | NOCHANGE         | NOCHANGE         | NOCHANGE         | NOCHANGE         |
| NOCHANGE         | UP               | DOWN             | NOCHANGE         | NOCHANGE         |
| DOWN             | DOWN             | DOWN             | NOCHANGE         | DOWN             |
| NOCHANGE         | NOCHANGE         | NOCHANGE         | NOCHANGE         | NOCHANGE         |
| DOWN             | DOWN             | NOCHANGE         | DOWN             | NOCHANGE         |
| NOCHANGE         | UP               | NOCHANGE         | NOCHANGE         | UP               |
| NOCHANGE         | UP               | NOCHANGE         | NOCHANGE         | UP               |
| DOWN             | NOCHANGE         | DOWN             | DOWN             | NOCHANGE         |
| NOCHANGE         | DOWN             | DOWN             | DOWN             | DOWN             |
| DOWN             | NOCHANGE         | DOWN             | NOCHANGE         | DOWN             |
| NOCHANGE         | NOCHANGE         | DOWN             | NOCHANGE         | NOCHANGE         |
| NOCHANGE         | NOCHANGE         | NOCHANGE         | NOCHANGE         | NOCHANGE         |
| NOCHANGE         | NOCHANGE         | NOCHANGE         | NOCHANGE         | NOCHANGE         |
| NOCHANGE         | NOCHANGE         | NOCHANGE         | NOCHANGE         | NOCHANGE         |
| NOCHANGE         | NOCHANGE         | DOWN             | NOCHANGE         | NOCHANGE         |
| NOCHANGE         | NOCHANGE         | NOCHANGE         | NOCHANGE         | NOCHANGE         |
| DOWN             | NOCHANGE         | NOCHANGE         | DOWN             | DOWN             |

| TCGA-B0-5113-01 | TCGA-A3-A6NL-0 | TCGA-CJ-5680-01 | TCGA-B0-5402-01 | TCGA-CZ-4862-01 |
|-----------------|----------------|-----------------|-----------------|-----------------|
| NOCHANGE        | NOCHANGE       | NOCHANGE        | UP              | NOCHANGE        |
| UP              | UP             | UP              | NOCHANGE        | UP              |
| NOCHANGE        | NOCHANGE       | NOCHANGE        | NOCHANGE        | NOCHANGE        |
| DOWN            | DOWN           | NOCHANGE        | DOWN            | NOCHANGE        |
| NOCHANGE        | NOCHANGE       | NOCHANGE        | NOCHANGE        | UP              |
| UP              | NOCHANGE       | UP              | NOCHANGE        | NOCHANGE        |
| DOWN            | NOCHANGE       | DOWN            | DOWN            | DOWN            |
| NOCHANGE        | NOCHANGE       | NOCHANGE        | NOCHANGE        | NOCHANGE        |
| NOCHANGE        | DOWN           | NOCHANGE        | NOCHANGE        | NOCHANGE        |
| NOCHANGE        | NOCHANGE       | NOCHANGE        | NOCHANGE        | NOCHANGE        |
| NOCHANGE        | NOCHANGE       | NOCHANGE        | DOWN            | NOCHANGE        |
| DOWN            | NOCHANGE       | DOWN            | NOCHANGE        | UP              |
| NOCHANGE        | NOCHANGE       | NOCHANGE        | NOCHANGE        | NOCHANGE        |
| NOCHANGE        | NOCHANGE       | NOCHANGE        | NOCHANGE        | UP              |
| DOWN            | DOWN           | NOCHANGE        | DOWN            | DOWN            |
| NOCHANGE        | NOCHANGE       | DOWN            | UP              | NOCHANGE        |
| NOCHANGE        | NOCHANGE       | UP              | NOCHANGE        | UP              |
| NOCHANGE        | DOWN           | NOCHANGE        | DOWN            | DOWN            |
| UP              | NOCHANGE       | NOCHANGE        | NOCHANGE        | UP              |
| NOCHANGE        | DOWN           | DOWN            | UP              | NOCHANGE        |
| UP              | NOCHANGE       | NOCHANGE        | NOCHANGE        | UP              |
| NOCHANGE        | NOCHANGE       | UP              | NOCHANGE        | NOCHANGE        |
| NOCHANGE        | DOWN           | NOCHANGE        | NOCHANGE        | NOCHANGE        |
| DOWN            | DOWN           | NOCHANGE        | NOCHANGE        | DOWN            |
| NOCHANGE        | DOWN           | NOCHANGE        | NOCHANGE        | DOWN            |
| DOWN            | DOWN           | NOCHANGE        | NOCHANGE        | DOWN            |
| NOCHANGE        | NOCHANGE       | NOCHANGE        | NOCHANGE        | NOCHANGE        |
| NOCHANGE        | NOCHANGE       | NOCHANGE        | NOCHANGE        | NOCHANGE        |
| NOCHANGE        | NOCHANGE       | NOCHANGE        | NOCHANGE        | NOCHANGE        |
| NOCHANGE        | NOCHANGE       | NOCHANGE        | NOCHANGE        | NOCHANGE        |
| NOCHANGE        | NOCHANGE       | DOWN            | NOCHANGE        | NOCHANGE        |
| DOWN            | DOWN           | NOCHANGE        | NOCHANGE        | DOWN            |

| TCGA-CW-6097-01 | TCGA-B4-5843-01 | TCGA-A3-3307-01 | TCGA-B0-4688-01 | TCGA-CJ-5689-01 |
|-----------------|-----------------|-----------------|-----------------|-----------------|
| NOCHANGE        | NOCHANGE        | NOCHANGE        | NOCHANGE        | NOCHANGE        |
| UP              | UP              | UP              | NOCHANGE        | UP              |
| NOCHANGE        | NOCHANGE        | NOCHANGE        | NOCHANGE        | NOCHANGE        |
| DOWN            | NOCHANGE        | DOWN            | DOWN            | DOWN            |
| UP              | NOCHANGE        | NOCHANGE        | NOCHANGE        | UP              |
| NOCHANGE        | NOCHANGE        | NOCHANGE        | DOWN            | NOCHANGE        |
| DOWN            | NOCHANGE        | NOCHANGE        | NOCHANGE        | NOCHANGE        |
| NOCHANGE        | NOCHANGE        | NOCHANGE        | NOCHANGE        | NOCHANGE        |
| NOCHANGE        | UP              | NOCHANGE        | UP              | UP              |
| DOWN            | NOCHANGE        | NOCHANGE        | NOCHANGE        | DOWN            |
| DOWN            | NOCHANGE        | NOCHANGE        | UP              | NOCHANGE        |
| DOWN            | NOCHANGE        | DOWN            | UP              | NOCHANGE        |
| NOCHANGE        | NOCHANGE        | NOCHANGE        | DOWN            | NOCHANGE        |
| UP              | NOCHANGE        | NOCHANGE        | NOCHANGE        | NOCHANGE        |
| NOCHANGE        | DOWN            | DOWN            | DOWN            | NOCHANGE        |
| NOCHANGE        | NOCHANGE        | NOCHANGE        | NOCHANGE        | NOCHANGE        |
| NOCHANGE        | NOCHANGE        | UP              | NOCHANGE        | NOCHANGE        |
| DOWN            | DOWN            | NOCHANGE        | DOWN            | DOWN            |
| UP              | UP              | NOCHANGE        | NOCHANGE        | NOCHANGE        |
| DOWN            | DOWN            | NOCHANGE        | DOWN            | DOWN            |
| UP              | NOCHANGE        | UP              | UP              | NOCHANGE        |
| UP              | NOCHANGE        | NOCHANGE        | UP              | NOCHANGE        |
| NOCHANGE        | NOCHANGE        | NOCHANGE        | UP              | NOCHANGE        |
| DOWN            | NOCHANGE        | NOCHANGE        | DOWN            | DOWN            |
| DOWN            | NOCHANGE        | NOCHANGE        | DOWN            | DOWN            |
| NOCHANGE        | NOCHANGE        | NOCHANGE        | NOCHANGE        | NOCHANGE        |
| NOCHANGE        | NOCHANGE        | NOCHANGE        | NOCHANGE        | NOCHANGE        |
| NOCHANGE        | NOCHANGE        | NOCHANGE        | NOCHANGE        | NOCHANGE        |
| NOCHANGE        | NOCHANGE        | NOCHANGE        | NOCHANGE        | NOCHANGE        |
| NOCHANGE        | NOCHANGE        | NOCHANGE        | DOWN            | NOCHANGE        |
| NOCHANGE        | NOCHANGE        | DOWN            | NOCHANGE        | NOCHANGE        |
| NOCHANGE        | DOWN            | NOCHANGE        | DOWN            | DOWN            |

| TCGA-BP-4335-01 | TCGA-CJ-4908-01 | TCGA-CZ-5458-01 | TCGA-B0-4690-01 | TCGA-CJ-4900-01 |
|-----------------|-----------------|-----------------|-----------------|-----------------|
| NOCHANGE        | NOCHANGE        | NOCHANGE        | UP              | NOCHANGE        |
| UP              | UP              | UP              | UP              | UP              |
| NOCHANGE        | NOCHANGE        | NOCHANGE        | NOCHANGE        | NOCHANGE        |
| NOCHANGE        | DOWN            | NOCHANGE        | DOWN            | DOWN            |
| NOCHANGE        | NOCHANGE        | NOCHANGE        | UP              | UP              |
| NOCHANGE        | NOCHANGE        | NOCHANGE        | NOCHANGE        | NOCHANGE        |
| NOCHANGE        | NOCHANGE        | DOWN            | NOCHANGE        | NOCHANGE        |
| NOCHANGE        | NOCHANGE        | NOCHANGE        | NOCHANGE        | NOCHANGE        |
| NOCHANGE        | NOCHANGE        | NOCHANGE        | NOCHANGE        | UP              |
| NOCHANGE        | NOCHANGE        | NOCHANGE        | NOCHANGE        | NOCHANGE        |
| DOWN            | DOWN            | NOCHANGE        | DOWN            | NOCHANGE        |
| NOCHANGE        | NOCHANGE        | NOCHANGE        | NOCHANGE        | NOCHANGE        |
| NOCHANGE        | NOCHANGE        | NOCHANGE        | DOWN            | NOCHANGE        |
| DOWN            | NOCHANGE        | NOCHANGE        | NOCHANGE        | NOCHANGE        |
| DOWN            | DOWN            | NOCHANGE        | DOWN            | DOWN            |
| NOCHANGE        | NOCHANGE        | NOCHANGE        | NOCHANGE        | NOCHANGE        |
| NOCHANGE        | NOCHANGE        | NOCHANGE        | NOCHANGE        | NOCHANGE        |
| DOWN            | DOWN            | DOWN            | DOWN            | NOCHANGE        |
| NOCHANGE        | NOCHANGE        | NOCHANGE        | NOCHANGE        | NOCHANGE        |
| NOCHANGE        | DOWN            | UP              | DOWN            | DOWN            |
| NOCHANGE        | NOCHANGE        | NOCHANGE        | UP              | NOCHANGE        |
| NOCHANGE        | NOCHANGE        | NOCHANGE        | NOCHANGE        | NOCHANGE        |
| DOWN            | NOCHANGE        | NOCHANGE        | UP              | NOCHANGE        |
| DOWN            | DOWN            | NOCHANGE        | DOWN            | DOWN            |
| DOWN            | DOWN            | DOWN            | DOWN            | DOWN            |
| NOCHANGE        | NOCHANGE        | NOCHANGE        | NOCHANGE        | NOCHANGE        |
| UP              | NOCHANGE        | NOCHANGE        | NOCHANGE        | UP              |
| NOCHANGE        | NOCHANGE        | NOCHANGE        | NOCHANGE        | NOCHANGE        |
| NOCHANGE        | NOCHANGE        | DOWN            | NOCHANGE        | NOCHANGE        |
| UP              | NOCHANGE        | NOCHANGE        | NOCHANGE        | NOCHANGE        |
| DOWN            | DOWN            | DOWN            | DOWN            | DOWN            |

| TCGA-A3-3359-01 | TCGA-CJ-4907-01 | TCGA-CZ-5460-01 | TCGA-B8-4622-01 | TCGA-BP-4994-01 |
|-----------------|-----------------|-----------------|-----------------|-----------------|
| NOCHANGE        | NOCHANGE        | NOCHANGE        | NOCHANGE        | NOCHANGE        |
| UP              | UP              | UP              | UP              | NOCHANGE        |
| NOCHANGE        | NOCHANGE        | NOCHANGE        | NOCHANGE        | NOCHANGE        |
| NOCHANGE        | DOWN            | DOWN            | NOCHANGE        | DOWN            |
| NOCHANGE        | NOCHANGE        | NOCHANGE        | NOCHANGE        | NOCHANGE        |
| NOCHANGE        | NOCHANGE        | UP              | NOCHANGE        | NOCHANGE        |
| NOCHANGE        | DOWN            | DOWN            | DOWN            | NOCHANGE        |
| DOWN            | DOWN            | NOCHANGE        | NOCHANGE        | NOCHANGE        |
| DOWN            | NOCHANGE        | NOCHANGE        | NOCHANGE        | NOCHANGE        |
| NOCHANGE        | NOCHANGE        | NOCHANGE        | NOCHANGE        | NOCHANGE        |
| DOWN            | DOWN            | NOCHANGE        | DOWN            | DOWN            |
| DOWN            | NOCHANGE        | DOWN            | UP              | DOWN            |
| NOCHANGE        | NOCHANGE        | NOCHANGE        | NOCHANGE        | NOCHANGE        |
| NOCHANGE        | NOCHANGE        | NOCHANGE        | NOCHANGE        | NOCHANGE        |
| DOWN            | NOCHANGE        | DOWN            | DOWN            | DOWN            |
| NOCHANGE        | NOCHANGE        | NOCHANGE        | NOCHANGE        | NOCHANGE        |
| NOCHANGE        | NOCHANGE        | NOCHANGE        | NOCHANGE        | NOCHANGE        |
| DOWN            | DOWN            | NOCHANGE        | DOWN            | DOWN            |
| NOCHANGE        | NOCHANGE        | NOCHANGE        | UP              | NOCHANGE        |
| DOWN            | NOCHANGE        | NOCHANGE        | NOCHANGE        | DOWN            |
| UP              | NOCHANGE        | NOCHANGE        | UP              | NOCHANGE        |
| UP              | UP              | NOCHANGE        | UP              | NOCHANGE        |
| DOWN            | NOCHANGE        | NOCHANGE        | NOCHANGE        | UP              |
| DOWN            | DOWN            | NOCHANGE        | DOWN            | NOCHANGE        |
| NOCHANGE        | DOWN            | DOWN            | DOWN            | NOCHANGE        |
| NOCHANGE        | NOCHANGE        | NOCHANGE        | DOWN            | NOCHANGE        |
| NOCHANGE        | NOCHANGE        | NOCHANGE        | NOCHANGE        | NOCHANGE        |
| NOCHANGE        | NOCHANGE        | NOCHANGE        | NOCHANGE        | NOCHANGE        |
| NOCHANGE        | NOCHANGE        | NOCHANGE        | NOCHANGE        | NOCHANGE        |
| NOCHANGE        | NOCHANGE        | NOCHANGE        | NOCHANGE        | NOCHANGE        |
| NOCHANGE        | NOCHANGE        | NOCHANGE        | NOCHANGE        | NOCHANGE        |
| DOWN            | DOWN            | NOCHANGE        | NOCHANGE        | NOCHANGE        |

| TCGA-B0-4703-01 | TCGA-BP-4346-01 | TCGA-B0-4839-01 | TCGA-CZ-5985-01 | TCGA-CZ-4865-01 |
|-----------------|-----------------|-----------------|-----------------|-----------------|
| NOCHANGE        | NOCHANGE        | NOCHANGE        | NOCHANGE        | NOCHANGE        |
| NOCHANGE        | UP              | UP              | UP              | UP              |
| NOCHANGE        | NOCHANGE        | NOCHANGE        | NOCHANGE        | NOCHANGE        |
| DOWN            | DOWN            | DOWN            | DOWN            | DOWN            |
| NOCHANGE        | NOCHANGE        | NOCHANGE        | NOCHANGE        | UP              |
| NOCHANGE        | NOCHANGE        | DOWN            | NOCHANGE        | NOCHANGE        |
| NOCHANGE        | DOWN            | DOWN            | DOWN            | DOWN            |
| NOCHANGE        | DOWN            | NOCHANGE        | NOCHANGE        | DOWN            |
| NOCHANGE        | NOCHANGE        | NOCHANGE        | UP              | NOCHANGE        |
| NOCHANGE        | NOCHANGE        | NOCHANGE        | DOWN            | NOCHANGE        |
| NOCHANGE        | NOCHANGE        | NOCHANGE        | NOCHANGE        | UP              |
| UP              | DOWN            | NOCHANGE        | DOWN            | NOCHANGE        |
| NOCHANGE        | NOCHANGE        | NOCHANGE        | NOCHANGE        | NOCHANGE        |
| NOCHANGE        | NOCHANGE        | DOWN            | UP              | NOCHANGE        |
| DOWN            | NOCHANGE        | DOWN            | DOWN            | NOCHANGE        |
| NOCHANGE        | NOCHANGE        | NOCHANGE        | NOCHANGE        | NOCHANGE        |
| NOCHANGE        | UP              | DOWN            | UP              | NOCHANGE        |
| DOWN            | DOWN            | NOCHANGE        | NOCHANGE        | NOCHANGE        |
| NOCHANGE        | UP              | NOCHANGE        | NOCHANGE        | NOCHANGE        |
| DOWN            | DOWN            | DOWN            | UP              | DOWN            |
| NOCHANGE        | UP              | NOCHANGE        | UP              | NOCHANGE        |
| UP              | NOCHANGE        | NOCHANGE        | NOCHANGE        | NOCHANGE        |
| NOCHANGE        | DOWN            | DOWN            | NOCHANGE        | NOCHANGE        |
| DOWN            | DOWN            | NOCHANGE        | DOWN            | NOCHANGE        |
| DOWN            | DOWN            | DOWN            | NOCHANGE        | DOWN            |
| NOCHANGE        | DOWN            | NOCHANGE        | DOWN            | NOCHANGE        |
| NOCHANGE        | UP              | NOCHANGE        | NOCHANGE        | NOCHANGE        |
| NOCHANGE        | NOCHANGE        | NOCHANGE        | NOCHANGE        | NOCHANGE        |
| NOCHANGE        | NOCHANGE        | DOWN            | NOCHANGE        | NOCHANGE        |
| NOCHANGE        | NOCHANGE        | NOCHANGE        | NOCHANGE        | NOCHANGE        |
| DOWN            | NOCHANGE        | DOWN            | NOCHANGE        | DOWN            |

| TCGA-CJ-5675-01 | TCGA-AK-3429-01 | TCGA-B0-4843-01 | TCGA-CJ-4886-01 | TCGA-B0-5083-01 |
|-----------------|-----------------|-----------------|-----------------|-----------------|
| NOCHANGE        | NOCHANGE        | NOCHANGE        | NOCHANGE        | DOWN            |
| UP              | UP              | NOCHANGE        | UP              | UP              |
| NOCHANGE        | NOCHANGE        | NOCHANGE        | NOCHANGE        | NOCHANGE        |
| DOWN            | DOWN            | DOWN            | DOWN            | DOWN            |
| NOCHANGE        | NOCHANGE        | NOCHANGE        | NOCHANGE        | NOCHANGE        |
| NOCHANGE        | NOCHANGE        | NOCHANGE        | NOCHANGE        | DOWN            |
| DOWN            | DOWN            | DOWN            | DOWN            | NOCHANGE        |
| DOWN            | NOCHANGE        | DOWN            | NOCHANGE        | NOCHANGE        |
| NOCHANGE        | DOWN            | UP              | DOWN            | NOCHANGE        |
| NOCHANGE        | DOWN            | NOCHANGE        | NOCHANGE        | NOCHANGE        |
| NOCHANGE        | NOCHANGE        | NOCHANGE        | NOCHANGE        | NOCHANGE        |
| DOWN            | DOWN            | NOCHANGE        | NOCHANGE        | NOCHANGE        |
| NOCHANGE        | NOCHANGE        | NOCHANGE        | NOCHANGE        | DOWN            |
| NOCHANGE        | NOCHANGE        | NOCHANGE        | NOCHANGE        | NOCHANGE        |
| NOCHANGE        | NOCHANGE        | DOWN            | NOCHANGE        | DOWN            |
| NOCHANGE        | DOWN            | NOCHANGE        | DOWN            | NOCHANGE        |
| NOCHANGE        | NOCHANGE        | NOCHANGE        | NOCHANGE        | NOCHANGE        |
| NOCHANGE        | NOCHANGE        | NOCHANGE        | NOCHANGE        | NOCHANGE        |
| NOCHANGE        | NOCHANGE        | NOCHANGE        | NOCHANGE        | NOCHANGE        |
| NOCHANGE        | UP              | DOWN            | DOWN            | DOWN            |
| NOCHANGE        | NOCHANGE        | NOCHANGE        | NOCHANGE        | NOCHANGE        |
| NOCHANGE        | DOWN            | DOWN            | DOWN            | DOWN            |
| UP              | NOCHANGE        | NOCHANGE        | NOCHANGE        | UP              |
| UP              | NOCHANGE        | NOCHANGE        | NOCHANGE        | NOCHANGE        |
| DOWN            | DOWN            | DOWN            | NOCHANGE        | NOCHANGE        |
| NOCHANGE        | NOCHANGE        | DOWN            | DOWN            | NOCHANGE        |
| NOCHANGE        | DOWN            | DOWN            | NOCHANGE        | NOCHANGE        |
| DOWN            | NOCHANGE        | DOWN            | NOCHANGE        | DOWN            |
| NOCHANGE        | NOCHANGE        | NOCHANGE        | NOCHANGE        | NOCHANGE        |
| NOCHANGE        | NOCHANGE        | NOCHANGE        | NOCHANGE        | NOCHANGE        |
| NOCHANGE        | NOCHANGE        | DOWN            | NOCHANGE        | DOWN            |
| NOCHANGE        | NOCHANGE        | NOCHANGE        | NOCHANGE        | NOCHANGE        |
| DOWN            | DOWN            | NOCHANGE        | DOWN            | NOCHANGE        |



| TCGA-B0-5117-01. | TCGA-BP-4325-01. | TCGA-CW-5580-01 | TCGA-BP-5000-01. | TCGA-B0-5106-01. |
|------------------|------------------|-----------------|------------------|------------------|
| DOWN             | NOCHANGE         | NOCHANGE        | NOCHANGE         | NOCHANGE         |
| NOCHANGE         | UP               | NOCHANGE        | UP               | UP               |
| NOCHANGE         | NOCHANGE         | NOCHANGE        | NOCHANGE         | NOCHANGE         |
| DOWN             | DOWN             | DOWN            | DOWN             | DOWN             |
| DOWN             | NOCHANGE         | UP              | NOCHANGE         | UP               |
| NOCHANGE         | UP               | NOCHANGE        | NOCHANGE         | DOWN             |
| NOCHANGE         | NOCHANGE         | DOWN            | NOCHANGE         | DOWN             |
| DOWN             | DOWN             | NOCHANGE        | NOCHANGE         | NOCHANGE         |
| NOCHANGE         | NOCHANGE         | NOCHANGE        | UP               | NOCHANGE         |
| UP               | NOCHANGE         | DOWN            | NOCHANGE         | NOCHANGE         |
| DOWN             | DOWN             | NOCHANGE        | NOCHANGE         | NOCHANGE         |
| DOWN             | DOWN             | NOCHANGE        | NOCHANGE         | NOCHANGE         |
| NOCHANGE         | NOCHANGE         | NOCHANGE        | NOCHANGE         | NOCHANGE         |
| DOWN             | NOCHANGE         | NOCHANGE        | DOWN             | NOCHANGE         |
| DOWN             | DOWN             | DOWN            | NOCHANGE         | DOWN             |
| NOCHANGE         | UP               | UP              | NOCHANGE         | NOCHANGE         |
| DOWN             | UP               | UP              | NOCHANGE         | NOCHANGE         |
| DOWN             | DOWN             | DOWN            | DOWN             | NOCHANGE         |
| DOWN             | NOCHANGE         | UP              | NOCHANGE         | NOCHANGE         |
| DOWN             | DOWN             | DOWN            | DOWN             | DOWN             |
| NOCHANGE         | UP               | UP              | NOCHANGE         | NOCHANGE         |
| NOCHANGE         | NOCHANGE         | NOCHANGE        | NOCHANGE         | NOCHANGE         |
| DOWN             | NOCHANGE         | NOCHANGE        | DOWN             | DOWN             |
| NOCHANGE         | DOWN             | DOWN            | DOWN             | DOWN             |
| NOCHANGE         | NOCHANGE         | NOCHANGE        | DOWN             | DOWN             |
| DOWN             | DOWN             | NOCHANGE        | NOCHANGE         | NOCHANGE         |
| NOCHANGE         | NOCHANGE         | NOCHANGE        | NOCHANGE         | UP               |
| NOCHANGE         | NOCHANGE         | NOCHANGE        | NOCHANGE         | NOCHANGE         |
| DOWN             | NOCHANGE         | NOCHANGE        | DOWN             | NOCHANGE         |
| NOCHANGE         | NOCHANGE         | NOCHANGE        | NOCHANGE         | NOCHANGE         |
| NOCHANGE         | NOCHANGE         | DOWN            | DOWN             | DOWN             |

| TCGA-CJ-6031-01 | TCGA-B0-4852-01 | TCGA-B0-5690-01 | TCGA-B0-4697-01 | TCGA-CZ-4859-01 |
|-----------------|-----------------|-----------------|-----------------|-----------------|
| NOCHANGE        | NOCHANGE        | NOCHANGE        | NOCHANGE        | NOCHANGE        |
| UP              | UP              | UP              | NOCHANGE        | UP              |
| NOCHANGE        | NOCHANGE        | NOCHANGE        | NOCHANGE        | NOCHANGE        |
| DOWN            | DOWN            | DOWN            | DOWN            | DOWN            |
| UP              | NOCHANGE        | NOCHANGE        | UP              | DOWN            |
| UP              | NOCHANGE        | NOCHANGE        | DOWN            | NOCHANGE        |
| DOWN            | DOWN            | NOCHANGE        | DOWN            | DOWN            |
| NOCHANGE        | NOCHANGE        | DOWN            | NOCHANGE        | DOWN            |
| UP              | DOWN            | DOWN            | NOCHANGE        | DOWN            |
| DOWN            | NOCHANGE        | NOCHANGE        | NOCHANGE        | NOCHANGE        |
| NOCHANGE        | NOCHANGE        | NOCHANGE        | NOCHANGE        | NOCHANGE        |
| NOCHANGE        | DOWN            | NOCHANGE        | NOCHANGE        | DOWN            |
| NOCHANGE        | NOCHANGE        | NOCHANGE        | NOCHANGE        | NOCHANGE        |
| NOCHANGE        | NOCHANGE        | NOCHANGE        | NOCHANGE        | NOCHANGE        |
| NOCHANGE        | NOCHANGE        | NOCHANGE        | NOCHANGE        | NOCHANGE        |
| NOCHANGE        | DOWN            | DOWN            | NOCHANGE        | DOWN            |
| NOCHANGE        | UP              | NOCHANGE        | DOWN            | UP              |
| NOCHANGE        | NOCHANGE        | NOCHANGE        | DOWN            | UP              |
| NOCHANGE        | DOWN            | DOWN            | DOWN            | NOCHANGE        |
| NOCHANGE        | NOCHANGE        | NOCHANGE        | NOCHANGE        | NOCHANGE        |
| DOWN            | DOWN            | DOWN            | DOWN            | DOWN            |
| UP              | NOCHANGE        | NOCHANGE        | NOCHANGE        | NOCHANGE        |
| UP              | NOCHANGE        | NOCHANGE        | NOCHANGE        | NOCHANGE        |
| UP              | NOCHANGE        | DOWN            | DOWN            | DOWN            |
| DOWN            | DOWN            | DOWN            | NOCHANGE        | NOCHANGE        |
| DOWN            | NOCHANGE        | NOCHANGE        | DOWN            | NOCHANGE        |
| NOCHANGE        | NOCHANGE        | NOCHANGE        | NOCHANGE        | NOCHANGE        |
| NOCHANGE        | NOCHANGE        | NOCHANGE        | UP              | NOCHANGE        |
| NOCHANGE        | NOCHANGE        | NOCHANGE        | NOCHANGE        | NOCHANGE        |
| NOCHANGE        | NOCHANGE        | NOCHANGE        | NOCHANGE        | NOCHANGE        |
| NOCHANGE        | NOCHANGE        | NOCHANGE        | DOWN            | NOCHANGE        |
| NOCHANGE        | NOCHANGE        | NOCHANGE        | NOCHANGE        | NOCHANGE        |
| DOWN            | DOWN            | DOWN            | DOWN            | NOCHANGE        |

| TCGA-BP-4789-01. | TCGA-CZ-5989-01 | TCGA-A3-3347-01 | TCGA-B0-4827-01. | TCGA-BP-4760-01. |
|------------------|-----------------|-----------------|------------------|------------------|
| NOCHANGE         | NOCHANGE        | UP              | NOCHANGE         | DOWN             |
| UP               | NOCHANGE        | UP              | UP               | NOCHANGE         |
| NOCHANGE         | NOCHANGE        | NOCHANGE        | NOCHANGE         | NOCHANGE         |
| DOWN             | DOWN            | DOWN            | DOWN             | DOWN             |
| NOCHANGE         | UP              | NOCHANGE        | UP               | NOCHANGE         |
| NOCHANGE         | NOCHANGE        | NOCHANGE        | UP               | NOCHANGE         |
| NOCHANGE         | NOCHANGE        | NOCHANGE        | DOWN             | DOWN             |
| NOCHANGE         | DOWN            | NOCHANGE        | NOCHANGE         | NOCHANGE         |
| DOWN             | NOCHANGE        | NOCHANGE        | NOCHANGE         | UP               |
| DOWN             | DOWN            | NOCHANGE        | NOCHANGE         | NOCHANGE         |
| NOCHANGE         | UP              | DOWN            | NOCHANGE         | NOCHANGE         |
| NOCHANGE         | DOWN            | NOCHANGE        | DOWN             | UP               |
| NOCHANGE         | NOCHANGE        | DOWN            | NOCHANGE         | NOCHANGE         |
| NOCHANGE         | NOCHANGE        | NOCHANGE        | NOCHANGE         | NOCHANGE         |
| NOCHANGE         | NOCHANGE        | NOCHANGE        | NOCHANGE         | NOCHANGE         |
| NOCHANGE         | DOWN            | DOWN            | NOCHANGE         | NOCHANGE         |
| NOCHANGE         | UP              | NOCHANGE        | NOCHANGE         | NOCHANGE         |
| NOCHANGE         | NOCHANGE        | NOCHANGE        | UP               | NOCHANGE         |
| DOWN             | DOWN            | DOWN            | DOWN             | DOWN             |
| NOCHANGE         | UP              | UP              | NOCHANGE         | NOCHANGE         |
| NOCHANGE         | NOCHANGE        | NOCHANGE        | NOCHANGE         | DOWN             |
| NOCHANGE         | UP              | UP              | UP               | NOCHANGE         |
| UP               | NOCHANGE        | UP              | UP               | UP               |
| NOCHANGE         | NOCHANGE        | UP              | DOWN             | DOWN             |
| DOWN             | DOWN            | DOWN            | DOWN             | DOWN             |
| DOWN             | DOWN            | NOCHANGE        | NOCHANGE         | NOCHANGE         |
| NOCHANGE         | NOCHANGE        | NOCHANGE        | DOWN             | NOCHANGE         |
| NOCHANGE         | NOCHANGE        | NOCHANGE        | NOCHANGE         | NOCHANGE         |
| NOCHANGE         | NOCHANGE        | NOCHANGE        | NOCHANGE         | NOCHANGE         |
| NOCHANGE         | DOWN            | NOCHANGE        | NOCHANGE         | NOCHANGE         |
| NOCHANGE         | NOCHANGE        | NOCHANGE        | DOWN             | NOCHANGE         |
| NOCHANGE         | NOCHANGE        | NOCHANGE        | NOCHANGE         | NOCHANGE         |
| DOWN             | DOWN            | DOWN            | DOWN             | NOCHANGE         |

| TCGA-CW-5581-01 | TCGA-AK-3427-01 | TCGA-AK-3445-01 | TCGA-BP-4763-01 | TCGA-BP-4776-01 |
|-----------------|-----------------|-----------------|-----------------|-----------------|
| NOCHANGE        | DOWN            | NOCHANGE        | UP              | NOCHANGE        |
| UP              | NOCHANGE        | UP              | UP              | UP              |
| NOCHANGE        | DOWN            | NOCHANGE        | NOCHANGE        | NOCHANGE        |
| DOWN            | NOCHANGE        | DOWN            | DOWN            | DOWN            |
| UP              | DOWN            | UP              | UP              | NOCHANGE        |
| UP              | DOWN            | NOCHANGE        | NOCHANGE        | NOCHANGE        |
| NOCHANGE        | NOCHANGE        | DOWN            | DOWN            | NOCHANGE        |
| NOCHANGE        | NOCHANGE        | NOCHANGE        | NOCHANGE        | NOCHANGE        |
| NOCHANGE        | NOCHANGE        | NOCHANGE        | NOCHANGE        | NOCHANGE        |
| NOCHANGE        | NOCHANGE        | NOCHANGE        | NOCHANGE        | NOCHANGE        |
| DOWN            | NOCHANGE        | NOCHANGE        | DOWN            | NOCHANGE        |
| DOWN            | DOWN            | NOCHANGE        | DOWN            | UP              |
| NOCHANGE        | DOWN            | UP              | NOCHANGE        | NOCHANGE        |
| NOCHANGE        | NOCHANGE        | NOCHANGE        | NOCHANGE        | NOCHANGE        |
| DOWN            | DOWN            | NOCHANGE        | NOCHANGE        | DOWN            |
| NOCHANGE        | UP              | DOWN            | DOWN            | NOCHANGE        |
| NOCHANGE        | DOWN            | NOCHANGE        | UP              | NOCHANGE        |
| NOCHANGE        | DOWN            | NOCHANGE        | NOCHANGE        | NOCHANGE        |
| NOCHANGE        | DOWN            | NOCHANGE        | NOCHANGE        | NOCHANGE        |
| NOCHANGE        | DOWN            | NOCHANGE        | NOCHANGE        | NOCHANGE        |
| NOCHANGE        | DOWN            | NOCHANGE        | NOCHANGE        | NOCHANGE        |
| NOCHANGE        | DOWN            | UP              | DOWN            | NOCHANGE        |
| NOCHANGE        | NOCHANGE        | UP              | NOCHANGE        | NOCHANGE        |
| NOCHANGE        | DOWN            | NOCHANGE        | NOCHANGE        | NOCHANGE        |
| NOCHANGE        | NOCHANGE        | NOCHANGE        | NOCHANGE        | NOCHANGE        |
| NOCHANGE        | UP              | DOWN            | NOCHANGE        | DOWN            |
| NOCHANGE        | NOCHANGE        | DOWN            | NOCHANGE        | NOCHANGE        |
| NOCHANGE        | NOCHANGE        | NOCHANGE        | NOCHANGE        | DOWN            |
| NOCHANGE        | UP              | NOCHANGE        | NOCHANGE        | NOCHANGE        |
| NOCHANGE        | DOWN            | NOCHANGE        | NOCHANGE        | NOCHANGE        |
| NOCHANGE        | NOCHANGE        | DOWN            | NOCHANGE        | NOCHANGE        |
| NOCHANGE        | NOCHANGE        | NOCHANGE        | NOCHANGE        | NOCHANGE        |
| NOCHANGE        | DOWN            | DOWN            | NOCHANGE        | DOWN            |
| NOCHANGE        | DOWN            | DOWN            | NOCHANGE        | NOCHANGE        |
| NOCHANGE        | UP              | DOWN            | NOCHANGE        | DOWN            |

|                  |                  |                  |                  |                  |
|------------------|------------------|------------------|------------------|------------------|
| TCGA-BP-5008-01. | TCGA-B0-5119-01. | TCGA-CJ-5684-01. | TCGA-BP-4338-01. | TCGA-B0-5085-01. |
| NOCHANGE         | NOCHANGE         | NOCHANGE         | UP               | NOCHANGE         |
| UP               | UP               | UP               | UP               | UP               |
| NOCHANGE         | NOCHANGE         | NOCHANGE         | NOCHANGE         | NOCHANGE         |
| NOCHANGE         | DOWN             | DOWN             | DOWN             | DOWN             |
| NOCHANGE         | NOCHANGE         | NOCHANGE         | NOCHANGE         | NOCHANGE         |
| NOCHANGE         | NOCHANGE         | NOCHANGE         | UP               | NOCHANGE         |
| NOCHANGE         | DOWN             | NOCHANGE         | DOWN             | NOCHANGE         |
| NOCHANGE         | NOCHANGE         | NOCHANGE         | UP               | NOCHANGE         |
| DOWN             | NOCHANGE         | DOWN             | UP               | NOCHANGE         |
| NOCHANGE         | NOCHANGE         | NOCHANGE         | NOCHANGE         | NOCHANGE         |
| DOWN             | NOCHANGE         | NOCHANGE         | DOWN             | NOCHANGE         |
| NOCHANGE         | DOWN             | NOCHANGE         | UP               | NOCHANGE         |
| NOCHANGE         | NOCHANGE         | NOCHANGE         | NOCHANGE         | NOCHANGE         |
| NOCHANGE         | NOCHANGE         | NOCHANGE         | UP               | DOWN             |
| NOCHANGE         | NOCHANGE         | DOWN             | DOWN             | DOWN             |
| NOCHANGE         | NOCHANGE         | NOCHANGE         | NOCHANGE         | NOCHANGE         |
| UP               | NOCHANGE         | NOCHANGE         | NOCHANGE         | DOWN             |
| DOWN             | NOCHANGE         | NOCHANGE         | NOCHANGE         | NOCHANGE         |
| NOCHANGE         | UP               | NOCHANGE         | UP               | NOCHANGE         |
| DOWN             | NOCHANGE         | NOCHANGE         | NOCHANGE         | DOWN             |
| NOCHANGE         | NOCHANGE         | NOCHANGE         | UP               | NOCHANGE         |
| NOCHANGE         | NOCHANGE         | NOCHANGE         | NOCHANGE         | NOCHANGE         |
| NOCHANGE         | NOCHANGE         | NOCHANGE         | NOCHANGE         | NOCHANGE         |
| NOCHANGE         | NOCHANGE         | NOCHANGE         | UP               | DOWN             |
| DOWN             | NOCHANGE         | NOCHANGE         | DOWN             | NOCHANGE         |
| DOWN             | NOCHANGE         | DOWN             | NOCHANGE         | DOWN             |
| NOCHANGE         | NOCHANGE         | NOCHANGE         | UP               | DOWN             |
| NOCHANGE         | NOCHANGE         | NOCHANGE         | NOCHANGE         | NOCHANGE         |
| UP               | NOCHANGE         | NOCHANGE         | NOCHANGE         | NOCHANGE         |
| NOCHANGE         | NOCHANGE         | DOWN             | NOCHANGE         | DOWN             |
| UP               | NOCHANGE         | NOCHANGE         | NOCHANGE         | NOCHANGE         |
| DOWN             | NOCHANGE         | DOWN             | NOCHANGE         | DOWN             |

|                 |                 |                 |                 |                 |
|-----------------|-----------------|-----------------|-----------------|-----------------|
| TCGA-A3-3380-01 | TCGA-B0-4691-01 | TCGA-B0-5695-01 | TCGA-A3-3317-01 | TCGA-CJ-5672-01 |
| NOCHANGE        | UP              | NOCHANGE        | NOCHANGE        | NOCHANGE        |
| NOCHANGE        | UP              | UP              | UP              | UP              |
| NOCHANGE        | NOCHANGE        | NOCHANGE        | NOCHANGE        | NOCHANGE        |
| DOWN            | DOWN            | DOWN            | UP              | DOWN            |
| NOCHANGE        | UP              | NOCHANGE        | NOCHANGE        | NOCHANGE        |
| NOCHANGE        | NOCHANGE        | NOCHANGE        | UP              | NOCHANGE        |
| NOCHANGE        | NOCHANGE        | NOCHANGE        | NOCHANGE        | DOWN            |
| NOCHANGE        | NOCHANGE        | NOCHANGE        | DOWN            | NOCHANGE        |
| NOCHANGE        | UP              | NOCHANGE        | NOCHANGE        | NOCHANGE        |
| NOCHANGE        | NOCHANGE        | NOCHANGE        | NOCHANGE        | NOCHANGE        |
| NOCHANGE        | NOCHANGE        | NOCHANGE        | NOCHANGE        | NOCHANGE        |
| UP              | NOCHANGE        | NOCHANGE        | UP              | NOCHANGE        |
| NOCHANGE        | NOCHANGE        | NOCHANGE        | NOCHANGE        | NOCHANGE        |
| NOCHANGE        | NOCHANGE        | NOCHANGE        | NOCHANGE        | NOCHANGE        |
| DOWN            | DOWN            | DOWN            | DOWN            | NOCHANGE        |
| NOCHANGE        | DOWN            | NOCHANGE        | NOCHANGE        | NOCHANGE        |
| NOCHANGE        | NOCHANGE        | NOCHANGE        | NOCHANGE        | NOCHANGE        |
| DOWN            | NOCHANGE        | DOWN            | DOWN            | NOCHANGE        |
| NOCHANGE        | NOCHANGE        | NOCHANGE        | NOCHANGE        | NOCHANGE        |
| DOWN            | NOCHANGE        | NOCHANGE        | DOWN            | NOCHANGE        |
| NOCHANGE        | NOCHANGE        | NOCHANGE        | UP              | UP              |
| NOCHANGE        | NOCHANGE        | UP              | UP              | UP              |
| DOWN            | NOCHANGE        | DOWN            | NOCHANGE        | DOWN            |
| DOWN            | NOCHANGE        | DOWN            | DOWN            | NOCHANGE        |
| DOWN            | DOWN            | NOCHANGE        | NOCHANGE        | NOCHANGE        |
| NOCHANGE        | NOCHANGE        | NOCHANGE        | NOCHANGE        | NOCHANGE        |
| NOCHANGE        | UP              | NOCHANGE        | NOCHANGE        | NOCHANGE        |
| NOCHANGE        | NOCHANGE        | NOCHANGE        | NOCHANGE        | NOCHANGE        |
| DOWN            | DOWN            | NOCHANGE        | NOCHANGE        | DOWN            |
| DOWN            | NOCHANGE        | NOCHANGE        | NOCHANGE        | NOCHANGE        |
| NOCHANGE        | DOWN            | DOWN            | NOCHANGE        | DOWN            |



| TCGA-CW-6088-01 | TCGA-BP-4758-01 | TCGA-BP-4355-01 | TCGA-CZ-4866-01 | TCGA-B8-4621-01 |
|-----------------|-----------------|-----------------|-----------------|-----------------|
| NOCHANGE        | NOCHANGE        | NOCHANGE        | NOCHANGE        | NOCHANGE        |
| UP              | UP              | UP              | UP              | UP              |
| NOCHANGE        | NOCHANGE        | NOCHANGE        | UP              | NOCHANGE        |
| DOWN            | DOWN            | NOCHANGE        | DOWN            | DOWN            |
| NOCHANGE        | DOWN            | NOCHANGE        | UP              | NOCHANGE        |
| UP              | DOWN            | NOCHANGE        | UP              | NOCHANGE        |
| DOWN            | DOWN            | NOCHANGE        | DOWN            | DOWN            |
| DOWN            | NOCHANGE        | NOCHANGE        | NOCHANGE        | NOCHANGE        |
| NOCHANGE        | DOWN            | NOCHANGE        | NOCHANGE        | UP              |
| NOCHANGE        | NOCHANGE        | NOCHANGE        | DOWN            | NOCHANGE        |
| NOCHANGE        | UP              | NOCHANGE        | NOCHANGE        | DOWN            |
| UP              | DOWN            | UP              | DOWN            | NOCHANGE        |
| NOCHANGE        | NOCHANGE        | NOCHANGE        | NOCHANGE        | NOCHANGE        |
| NOCHANGE        | DOWN            | NOCHANGE        | UP              | NOCHANGE        |
| DOWN            | DOWN            | NOCHANGE        | DOWN            | NOCHANGE        |
| UP              | NOCHANGE        | NOCHANGE        | NOCHANGE        | NOCHANGE        |
| UP              | NOCHANGE        | NOCHANGE        | NOCHANGE        | NOCHANGE        |
| DOWN            | NOCHANGE        | DOWN            | NOCHANGE        | DOWN            |
| UP              | NOCHANGE        | NOCHANGE        | NOCHANGE        | NOCHANGE        |
| NOCHANGE        | DOWN            | DOWN            | UP              | NOCHANGE        |
| NOCHANGE        | NOCHANGE        | NOCHANGE        | UP              | NOCHANGE        |
| UP              | NOCHANGE        | NOCHANGE        | NOCHANGE        | NOCHANGE        |
| UP              | DOWN            | DOWN            | NOCHANGE        | UP              |
| DOWN            | NOCHANGE        | DOWN            | DOWN            | NOCHANGE        |
| NOCHANGE        | DOWN            | DOWN            | NOCHANGE        | NOCHANGE        |
| NOCHANGE        | DOWN            | NOCHANGE        | NOCHANGE        | NOCHANGE        |
| NOCHANGE        | NOCHANGE        | NOCHANGE        | NOCHANGE        | NOCHANGE        |
| NOCHANGE        | NOCHANGE        | NOCHANGE        | NOCHANGE        | NOCHANGE        |
| NOCHANGE        | NOCHANGE        | NOCHANGE        | NOCHANGE        | NOCHANGE        |
| NOCHANGE        | NOCHANGE        | NOCHANGE        | NOCHANGE        | NOCHANGE        |
| NOCHANGE        | DOWN            | DOWN            | NOCHANGE        | DOWN            |
| NOCHANGE        | NOCHANGE        | NOCHANGE        | NOCHANGE        | DOWN            |
| DOWN            | DOWN            | DOWN            | UP              | NOCHANGE        |



| TCGA-BP-4995-01. | TCGA-BP-5004-01. | TCGA-B8-5162-01. | TCGA-B0-4847-01. | TCGA-BP-4769-01. |
|------------------|------------------|------------------|------------------|------------------|
| NOCHANGE         | NOCHANGE         | NOCHANGE         | NOCHANGE         | NOCHANGE         |
| NOCHANGE         | UP               | UP               | UP               | NOCHANGE         |
| NOCHANGE         | NOCHANGE         | NOCHANGE         | NOCHANGE         | NOCHANGE         |
| DOWN             | DOWN             | DOWN             | DOWN             | NOCHANGE         |
| NOCHANGE         | UP               | NOCHANGE         | NOCHANGE         | NOCHANGE         |
| NOCHANGE         | NOCHANGE         | DOWN             | NOCHANGE         | NOCHANGE         |
| NOCHANGE         | DOWN             | DOWN             | NOCHANGE         | DOWN             |
| NOCHANGE         | NOCHANGE         | NOCHANGE         | NOCHANGE         | NOCHANGE         |
| NOCHANGE         | NOCHANGE         | NOCHANGE         | NOCHANGE         | UP               |
| NOCHANGE         | NOCHANGE         | DOWN             | NOCHANGE         | NOCHANGE         |
| DOWN             | DOWN             | NOCHANGE         | UP               | NOCHANGE         |
| DOWN             | NOCHANGE         | NOCHANGE         | NOCHANGE         | UP               |
| NOCHANGE         | NOCHANGE         | DOWN             | NOCHANGE         | NOCHANGE         |
| NOCHANGE         | NOCHANGE         | NOCHANGE         | NOCHANGE         | NOCHANGE         |
| DOWN             | DOWN             | DOWN             | NOCHANGE         | NOCHANGE         |
| NOCHANGE         | UP               | UP               | NOCHANGE         | NOCHANGE         |
| NOCHANGE         | NOCHANGE         | NOCHANGE         | NOCHANGE         | NOCHANGE         |
| DOWN             | DOWN             | DOWN             | NOCHANGE         | DOWN             |
| NOCHANGE         | NOCHANGE         | NOCHANGE         | NOCHANGE         | NOCHANGE         |
| DOWN             | NOCHANGE         | DOWN             | DOWN             | DOWN             |
| NOCHANGE         | NOCHANGE         | UP               | NOCHANGE         | NOCHANGE         |
| NOCHANGE         | UP               | NOCHANGE         | NOCHANGE         | UP               |
| UP               | NOCHANGE         | NOCHANGE         | DOWN             | DOWN             |
| NOCHANGE         | DOWN             | DOWN             | NOCHANGE         | DOWN             |
| NOCHANGE         | NOCHANGE         | DOWN             | DOWN             | DOWN             |
| NOCHANGE         | NOCHANGE         | NOCHANGE         | DOWN             | NOCHANGE         |
| NOCHANGE         | NOCHANGE         | NOCHANGE         | NOCHANGE         | NOCHANGE         |
| NOCHANGE         | NOCHANGE         | NOCHANGE         | NOCHANGE         | UP               |
| NOCHANGE         | NOCHANGE         | NOCHANGE         | DOWN             | NOCHANGE         |
| NOCHANGE         | NOCHANGE         | NOCHANGE         | NOCHANGE         | NOCHANGE         |
| NOCHANGE         | DOWN             | DOWN             | DOWN             | NOCHANGE         |

| TCGA-CZ-5982-01 | TCGA-CJ-4870-01 | TCGA-AK-3454-01 | TCGA-BP-4975-01 | TCGA-CW-5585-01 |
|-----------------|-----------------|-----------------|-----------------|-----------------|
| NOCHANGE        | NOCHANGE        | NOCHANGE        | NOCHANGE        | NOCHANGE        |
| NOCHANGE        | UP              | UP              | UP              | UP              |
| NOCHANGE        | NOCHANGE        | NOCHANGE        | NOCHANGE        | NOCHANGE        |
| DOWN            | DOWN            | DOWN            | DOWN            | DOWN            |
| UP              | NOCHANGE        | NOCHANGE        | NOCHANGE        | DOWN            |
| UP              | NOCHANGE        | NOCHANGE        | UP              | NOCHANGE        |
| DOWN            | DOWN            | NOCHANGE        | DOWN            | DOWN            |
| NOCHANGE        | NOCHANGE        | NOCHANGE        | NOCHANGE        | DOWN            |
| DOWN            | DOWN            | NOCHANGE        | UP              | NOCHANGE        |
| NOCHANGE        | NOCHANGE        | NOCHANGE        | NOCHANGE        | NOCHANGE        |
| DOWN            | NOCHANGE        | UP              | DOWN            | NOCHANGE        |
| NOCHANGE        | DOWN            | UP              | NOCHANGE        | DOWN            |
| NOCHANGE        | NOCHANGE        | NOCHANGE        | NOCHANGE        | NOCHANGE        |
| NOCHANGE        | NOCHANGE        | DOWN            | NOCHANGE        | NOCHANGE        |
| DOWN            | DOWN            | NOCHANGE        | DOWN            | DOWN            |
| NOCHANGE        | NOCHANGE        | DOWN            | NOCHANGE        | NOCHANGE        |
| UP              | NOCHANGE        | DOWN            | NOCHANGE        | NOCHANGE        |
| DOWN            | NOCHANGE        | DOWN            | NOCHANGE        | NOCHANGE        |
| NOCHANGE        | NOCHANGE        | NOCHANGE        | UP              | NOCHANGE        |
| DOWN            | NOCHANGE        | DOWN            | NOCHANGE        | NOCHANGE        |
| NOCHANGE        | NOCHANGE        | NOCHANGE        | NOCHANGE        | NOCHANGE        |
| UP              | NOCHANGE        | NOCHANGE        | NOCHANGE        | UP              |
| NOCHANGE        | DOWN            | DOWN            | NOCHANGE        | DOWN            |
| DOWN            | NOCHANGE        | NOCHANGE        | NOCHANGE        | NOCHANGE        |
| NOCHANGE        | DOWN            | DOWN            | NOCHANGE        | NOCHANGE        |
| DOWN            | NOCHANGE        | NOCHANGE        | NOCHANGE        | NOCHANGE        |
| NOCHANGE        | NOCHANGE        | NOCHANGE        | NOCHANGE        | NOCHANGE        |
| NOCHANGE        | NOCHANGE        | NOCHANGE        | NOCHANGE        | NOCHANGE        |
| NOCHANGE        | NOCHANGE        | NOCHANGE        | NOCHANGE        | NOCHANGE        |
| NOCHANGE        | NOCHANGE        | DOWN            | NOCHANGE        | NOCHANGE        |
| DOWN            | NOCHANGE        | NOCHANGE        | NOCHANGE        | DOWN            |
| NOCHANGE        | DOWN            | DOWN            | NOCHANGE        | DOWN            |

| TCGA-B2-4098-01 | TCGA-CJ-5678-01 | TCGA-B0-5702-01 | TCGA-CJ-4638-01 | TCGA-DV-5573-01 |
|-----------------|-----------------|-----------------|-----------------|-----------------|
| UP              | UP              | NOCHANGE        | UP              | NOCHANGE        |
| UP              | UP              | UP              | UP              | UP              |
| NOCHANGE        | NOCHANGE        | NOCHANGE        | NOCHANGE        | NOCHANGE        |
| DOWN            | DOWN            | DOWN            | DOWN            | DOWN            |
| UP              | UP              | DOWN            | NOCHANGE        | NOCHANGE        |
| UP              | NOCHANGE        | DOWN            | NOCHANGE        | NOCHANGE        |
| DOWN            | DOWN            | NOCHANGE        | DOWN            | NOCHANGE        |
| NOCHANGE        | NOCHANGE        | NOCHANGE        | NOCHANGE        | NOCHANGE        |
| UP              | NOCHANGE        | NOCHANGE        | UP              | NOCHANGE        |
| NOCHANGE        | NOCHANGE        | UP              | NOCHANGE        | NOCHANGE        |
| NOCHANGE        | NOCHANGE        | DOWN            | UP              | NOCHANGE        |
| DOWN            | DOWN            | NOCHANGE        | NOCHANGE        | NOCHANGE        |
| NOCHANGE        | NOCHANGE        | NOCHANGE        | NOCHANGE        | NOCHANGE        |
| NOCHANGE        | NOCHANGE        | DOWN            | NOCHANGE        | NOCHANGE        |
| DOWN            | DOWN            | NOCHANGE        | DOWN            | DOWN            |
| UP              | NOCHANGE        | DOWN            | DOWN            | NOCHANGE        |
| NOCHANGE        | NOCHANGE        | DOWN            | DOWN            | NOCHANGE        |
| NOCHANGE        | UP              | UP              | NOCHANGE        | NOCHANGE        |
| NOCHANGE        | NOCHANGE        | DOWN            | NOCHANGE        | NOCHANGE        |
| NOCHANGE        | NOCHANGE        | DOWN            | DOWN            | NOCHANGE        |
| UP              | NOCHANGE        | UP              | NOCHANGE        | NOCHANGE        |
| NOCHANGE        | NOCHANGE        | NOCHANGE        | NOCHANGE        | NOCHANGE        |
| UP              | DOWN            | DOWN            | DOWN            | NOCHANGE        |
| DOWN            | NOCHANGE        | UP              | NOCHANGE        | DOWN            |
| DOWN            | DOWN            | DOWN            | DOWN            | DOWN            |
| UP              | DOWN            | NOCHANGE        | NOCHANGE        | NOCHANGE        |
| NOCHANGE        | NOCHANGE        | NOCHANGE        | UP              | NOCHANGE        |
| NOCHANGE        | NOCHANGE        | NOCHANGE        | NOCHANGE        | NOCHANGE        |
| NOCHANGE        | NOCHANGE        | DOWN            | DOWN            | NOCHANGE        |
| DOWN            | NOCHANGE        | NOCHANGE        | DOWN            | NOCHANGE        |
| UP              | NOCHANGE        | DOWN            | NOCHANGE        | DOWN            |

| TCGA-BP-5196-01 | TCGA-A3-3351-01 | TCGA-B8-A54D-01 | TCGA-A3-3322-01 | TCGA-B8-A54H-01 |
|-----------------|-----------------|-----------------|-----------------|-----------------|
| NOCHANGE        | NOCHANGE        | NOCHANGE        | NOCHANGE        | NOCHANGE        |
| NOCHANGE        | UP              | UP              | UP              | UP              |
| NOCHANGE        | NOCHANGE        | NOCHANGE        | NOCHANGE        | NOCHANGE        |
| DOWN            | DOWN            | NOCHANGE        | DOWN            | DOWN            |
| NOCHANGE        | UP              | NOCHANGE        | NOCHANGE        | NOCHANGE        |
| NOCHANGE        | NOCHANGE        | NOCHANGE        | NOCHANGE        | NOCHANGE        |
| DOWN            | NOCHANGE        | DOWN            | NOCHANGE        | DOWN            |
| NOCHANGE        | NOCHANGE        | NOCHANGE        | DOWN            | DOWN            |
| NOCHANGE        | DOWN            | NOCHANGE        | NOCHANGE        | NOCHANGE        |
| DOWN            | NOCHANGE        | NOCHANGE        | NOCHANGE        | NOCHANGE        |
| NOCHANGE        | DOWN            | UP              | DOWN            | NOCHANGE        |
| UP              | NOCHANGE        | NOCHANGE        | DOWN            | DOWN            |
| NOCHANGE        | NOCHANGE        | NOCHANGE        | NOCHANGE        | NOCHANGE        |
| NOCHANGE        | NOCHANGE        | NOCHANGE        | NOCHANGE        | NOCHANGE        |
| DOWN            | DOWN            | DOWN            | DOWN            | NOCHANGE        |
| DOWN            | NOCHANGE        | NOCHANGE        | UP              | NOCHANGE        |
| NOCHANGE        | UP              | NOCHANGE        | NOCHANGE        | UP              |
| DOWN            | DOWN            | DOWN            | NOCHANGE        | NOCHANGE        |
| UP              | UP              | NOCHANGE        | UP              | UP              |
| DOWN            | DOWN            | DOWN            | DOWN            | DOWN            |
| NOCHANGE        | UP              | NOCHANGE        | UP              | NOCHANGE        |
| UP              | UP              | NOCHANGE        | UP              | UP              |
| NOCHANGE        | DOWN            | DOWN            | NOCHANGE        | DOWN            |
| NOCHANGE        | DOWN            | DOWN            | DOWN            | DOWN            |
| DOWN            | DOWN            | DOWN            | DOWN            | NOCHANGE        |
| NOCHANGE        | DOWN            | DOWN            | NOCHANGE        | NOCHANGE        |
| NOCHANGE        | NOCHANGE        | NOCHANGE        | NOCHANGE        | NOCHANGE        |
| NOCHANGE        | NOCHANGE        | NOCHANGE        | NOCHANGE        | NOCHANGE        |
| NOCHANGE        | NOCHANGE        | NOCHANGE        | NOCHANGE        | NOCHANGE        |
| NOCHANGE        | NOCHANGE        | DOWN            | NOCHANGE        | NOCHANGE        |
| NOCHANGE        | NOCHANGE        | NOCHANGE        | NOCHANGE        | NOCHANGE        |
| DOWN            | DOWN            | NOCHANGE        | DOWN            | NOCHANGE        |

| TCGA-A3-A80W-0 | TCGA-B0-4701-01. | TCGA-B2-4101-01. | TCGA-A3-3320-01 | TCGA-BP-4999-01. |
|----------------|------------------|------------------|-----------------|------------------|
| NOCHANGE       | NOCHANGE         | NOCHANGE         | NOCHANGE        | NOCHANGE         |
| UP             | NOCHANGE         | UP               | UP              | NOCHANGE         |
| NOCHANGE       | NOCHANGE         | NOCHANGE         | NOCHANGE        | NOCHANGE         |
| DOWN           | DOWN             | DOWN             | NOCHANGE        | NOCHANGE         |
| NOCHANGE       | UP               | UP               | NOCHANGE        | NOCHANGE         |
| NOCHANGE       | UP               | NOCHANGE         | UP              | NOCHANGE         |
| NOCHANGE       | NOCHANGE         | NOCHANGE         | NOCHANGE        | NOCHANGE         |
| NOCHANGE       | UP               | NOCHANGE         | NOCHANGE        | NOCHANGE         |
| DOWN           | NOCHANGE         | NOCHANGE         | NOCHANGE        | DOWN             |
| NOCHANGE       | NOCHANGE         | NOCHANGE         | NOCHANGE        | NOCHANGE         |
| NOCHANGE       | NOCHANGE         | NOCHANGE         | DOWN            | DOWN             |
| NOCHANGE       | NOCHANGE         | NOCHANGE         | NOCHANGE        | NOCHANGE         |
| NOCHANGE       | NOCHANGE         | NOCHANGE         | NOCHANGE        | NOCHANGE         |
| NOCHANGE       | NOCHANGE         | NOCHANGE         | NOCHANGE        | NOCHANGE         |
| DOWN           | DOWN             | DOWN             | DOWN            | DOWN             |
| NOCHANGE       | NOCHANGE         | NOCHANGE         | UP              | NOCHANGE         |
| NOCHANGE       | UP               | NOCHANGE         | NOCHANGE        | NOCHANGE         |
| NOCHANGE       | DOWN             | DOWN             | DOWN            | DOWN             |
| NOCHANGE       | NOCHANGE         | NOCHANGE         | UP              | UP               |
| NOCHANGE       | DOWN             | NOCHANGE         | DOWN            | NOCHANGE         |
| NOCHANGE       | NOCHANGE         | UP               | NOCHANGE        | NOCHANGE         |
| UP             | NOCHANGE         | UP               | UP              | NOCHANGE         |
| DOWN           | UP               | UP               | NOCHANGE        | NOCHANGE         |
| NOCHANGE       | NOCHANGE         | DOWN             | DOWN            | DOWN             |
| NOCHANGE       | DOWN             | DOWN             | NOCHANGE        | DOWN             |
| NOCHANGE       | UP               | NOCHANGE         | NOCHANGE        | DOWN             |
| UP             | NOCHANGE         | NOCHANGE         | UP              | NOCHANGE         |
| NOCHANGE       | NOCHANGE         | NOCHANGE         | NOCHANGE        | NOCHANGE         |
| DOWN           | NOCHANGE         | NOCHANGE         | NOCHANGE        | NOCHANGE         |
| NOCHANGE       | NOCHANGE         | DOWN             | NOCHANGE        | NOCHANGE         |
| DOWN           | NOCHANGE         | DOWN             | DOWN            | DOWN             |

| TCGA-BP-4161-01 | TCGA-B8-4143-01 | TCGA-B0-5701-01 | TCGA-BP-4797-01 | TCGA-DV-A4W0-0 |
|-----------------|-----------------|-----------------|-----------------|----------------|
| NOCHANGE        | NOCHANGE        | UP              | NOCHANGE        | DOWN           |
| UP              | UP              | UP              | UP              | NOCHANGE       |
| NOCHANGE        | NOCHANGE        | NOCHANGE        | NOCHANGE        | NOCHANGE       |
| DOWN            | DOWN            | DOWN            | DOWN            | DOWN           |
| UP              | UP              | UP              | UP              | NOCHANGE       |
| NOCHANGE        | NOCHANGE        | NOCHANGE        | UP              | NOCHANGE       |
| DOWN            | DOWN            | DOWN            | DOWN            | DOWN           |
| NOCHANGE        | NOCHANGE        | NOCHANGE        | NOCHANGE        | NOCHANGE       |
| NOCHANGE        | NOCHANGE        | NOCHANGE        | NOCHANGE        | NOCHANGE       |
| NOCHANGE        | NOCHANGE        | DOWN            | NOCHANGE        | NOCHANGE       |
| NOCHANGE        | NOCHANGE        | NOCHANGE        | NOCHANGE        | DOWN           |
| NOCHANGE        | NOCHANGE        | NOCHANGE        | NOCHANGE        | NOCHANGE       |
| NOCHANGE        | NOCHANGE        | NOCHANGE        | NOCHANGE        | DOWN           |
| DOWN            | DOWN            | DOWN            | DOWN            | NOCHANGE       |
| NOCHANGE        | NOCHANGE        | NOCHANGE        | NOCHANGE        | DOWN           |
| NOCHANGE        | NOCHANGE        | NOCHANGE        | NOCHANGE        | NOCHANGE       |
| DOWN            | DOWN            | NOCHANGE        | DOWN            | DOWN           |
| UP              | NOCHANGE        | NOCHANGE        | NOCHANGE        | UP             |
| NOCHANGE        | DOWN            | NOCHANGE        | NOCHANGE        | DOWN           |
| UP              | NOCHANGE        | NOCHANGE        | UP              | NOCHANGE       |
| UP              | NOCHANGE        | NOCHANGE        | NOCHANGE        | NOCHANGE       |
| NOCHANGE        | DOWN            | NOCHANGE        | NOCHANGE        | DOWN           |
| DOWN            | DOWN            | DOWN            | NOCHANGE        | NOCHANGE       |
| DOWN            | DOWN            | NOCHANGE        | NOCHANGE        | DOWN           |
| NOCHANGE        | NOCHANGE        | NOCHANGE        | NOCHANGE        | NOCHANGE       |
| NOCHANGE        | NOCHANGE        | NOCHANGE        | NOCHANGE        | NOCHANGE       |
| NOCHANGE        | NOCHANGE        | DOWN            | NOCHANGE        | NOCHANGE       |
| NOCHANGE        | DOWN            | DOWN            | NOCHANGE        | NOCHANGE       |
| NOCHANGE        | NOCHANGE        | DOWN            | NOCHANGE        | DOWN           |
| NOCHANGE        | DOWN            | NOCHANGE        | NOCHANGE        | DOWN           |

| TCGA-BP-4174-01. | TCGA-A3-3385-01 | TCGA-CZ-5469-01 | TCGA-BP-4970-01. | TCGA-BP-4330-01. |
|------------------|-----------------|-----------------|------------------|------------------|
| NOCHANGE         | NOCHANGE        | NOCHANGE        | NOCHANGE         | NOCHANGE         |
| UP               | UP              | NOCHANGE        | UP               | UP               |
| NOCHANGE         | NOCHANGE        | NOCHANGE        | NOCHANGE         | NOCHANGE         |
| NOCHANGE         | DOWN            | DOWN            | DOWN             | DOWN             |
| UP               | NOCHANGE        | NOCHANGE        | UP               | NOCHANGE         |
| NOCHANGE         | UP              | DOWN            | NOCHANGE         | NOCHANGE         |
| DOWN             | NOCHANGE        | DOWN            | DOWN             | DOWN             |
| DOWN             | DOWN            | NOCHANGE        | NOCHANGE         | NOCHANGE         |
| UP               | NOCHANGE        | UP              | NOCHANGE         | NOCHANGE         |
| NOCHANGE         | NOCHANGE        | NOCHANGE        | NOCHANGE         | NOCHANGE         |
| DOWN             | DOWN            | UP              | NOCHANGE         | DOWN             |
| NOCHANGE         | NOCHANGE        | NOCHANGE        | NOCHANGE         | NOCHANGE         |
| NOCHANGE         | NOCHANGE        | NOCHANGE        | NOCHANGE         | NOCHANGE         |
| NOCHANGE         | NOCHANGE        | NOCHANGE        | NOCHANGE         | NOCHANGE         |
| DOWN             | DOWN            | DOWN            | NOCHANGE         | DOWN             |
| NOCHANGE         | NOCHANGE        | DOWN            | NOCHANGE         | NOCHANGE         |
| NOCHANGE         | NOCHANGE        | NOCHANGE        | UP               | NOCHANGE         |
| NOCHANGE         | NOCHANGE        | NOCHANGE        | DOWN             | DOWN             |
| NOCHANGE         | UP              | NOCHANGE        | NOCHANGE         | UP               |
| NOCHANGE         | DOWN            | DOWN            | NOCHANGE         | DOWN             |
| UP               | NOCHANGE        | NOCHANGE        | UP               | UP               |
| UP               | NOCHANGE        | NOCHANGE        | UP               | UP               |
| NOCHANGE         | DOWN            | DOWN            | NOCHANGE         | DOWN             |
| NOCHANGE         | DOWN            | DOWN            | DOWN             | DOWN             |
| NOCHANGE         | NOCHANGE        | DOWN            | DOWN             | DOWN             |
| NOCHANGE         | DOWN            | NOCHANGE        | NOCHANGE         | DOWN             |
| NOCHANGE         | NOCHANGE        | NOCHANGE        | NOCHANGE         | NOCHANGE         |
| NOCHANGE         | DOWN            | NOCHANGE        | NOCHANGE         | NOCHANGE         |
| NOCHANGE         | DOWN            | DOWN            | NOCHANGE         | NOCHANGE         |
| NOCHANGE         | DOWN            | DOWN            | NOCHANGE         | DOWN             |
| DOWN             | NOCHANGE        | NOCHANGE        | DOWN             | DOWN             |

| TCGA-BP-4349-01 | TCGA-AK-3461-01 | TCGA-A3-3383-01 | TCGA-BP-4159-01 | TCGA-B2-5635-01 |
|-----------------|-----------------|-----------------|-----------------|-----------------|
| NOCHANGE        | NOCHANGE        | NOCHANGE        | NOCHANGE        | NOCHANGE        |
| NOCHANGE        | NOCHANGE        | UP              | UP              | NOCHANGE        |
| NOCHANGE        | NOCHANGE        | NOCHANGE        | NOCHANGE        | NOCHANGE        |
| NOCHANGE        | NOCHANGE        | DOWN            | DOWN            | NOCHANGE        |
| NOCHANGE        | UP              | NOCHANGE        | NOCHANGE        | UP              |
| UP              | NOCHANGE        | NOCHANGE        | NOCHANGE        | NOCHANGE        |
| NOCHANGE        | NOCHANGE        | NOCHANGE        | DOWN            | DOWN            |
| NOCHANGE        | NOCHANGE        | NOCHANGE        | NOCHANGE        | DOWN            |
| NOCHANGE        | NOCHANGE        | DOWN            | NOCHANGE        | NOCHANGE        |
| NOCHANGE        | NOCHANGE        | UP              | NOCHANGE        | NOCHANGE        |
| NOCHANGE        | NOCHANGE        | UP              | NOCHANGE        | NOCHANGE        |
| NOCHANGE        | NOCHANGE        | NOCHANGE        | DOWN            | NOCHANGE        |
| NOCHANGE        | NOCHANGE        | NOCHANGE        | NOCHANGE        | NOCHANGE        |
| NOCHANGE        | NOCHANGE        | NOCHANGE        | DOWN            | UP              |
| NOCHANGE        | NOCHANGE        | DOWN            | DOWN            | DOWN            |
| NOCHANGE        | NOCHANGE        | NOCHANGE        | NOCHANGE        | UP              |
| NOCHANGE        | UP              | NOCHANGE        | NOCHANGE        | NOCHANGE        |
| NOCHANGE        | DOWN            | NOCHANGE        | NOCHANGE        | DOWN            |
| NOCHANGE        | NOCHANGE        | NOCHANGE        | DOWN            | UP              |
| DOWN            | NOCHANGE        | DOWN            | DOWN            | NOCHANGE        |
| NOCHANGE        | NOCHANGE        | NOCHANGE        | NOCHANGE        | UP              |
| NOCHANGE        | NOCHANGE        | NOCHANGE        | NOCHANGE        | NOCHANGE        |
| NOCHANGE        | DOWN            | DOWN            | DOWN            | NOCHANGE        |
| DOWN            | DOWN            | NOCHANGE        | NOCHANGE        | DOWN            |
| NOCHANGE        | NOCHANGE        | DOWN            | DOWN            | DOWN            |
| NOCHANGE        | DOWN            | NOCHANGE        | NOCHANGE        | DOWN            |
| NOCHANGE        | NOCHANGE        | NOCHANGE        | NOCHANGE        | NOCHANGE        |
| NOCHANGE        | NOCHANGE        | NOCHANGE        | NOCHANGE        | DOWN            |
| NOCHANGE        | NOCHANGE        | DOWN            | NOCHANGE        | NOCHANGE        |
| NOCHANGE        | NOCHANGE        | DOWN            | DOWN            | NOCHANGE        |
| DOWN            | DOWN            | DOWN            | DOWN            | DOWN            |



|                 |                 |                 |                 |                 |
|-----------------|-----------------|-----------------|-----------------|-----------------|
| TCGA-CJ-4889-01 | TCGA-BP-4962-01 | TCGA-CJ-5682-01 | TCGA-BP-4347-01 | TCGA-BP-5186-01 |
| NOCHANGE        | NOCHANGE        | NOCHANGE        | NOCHANGE        | NOCHANGE        |
| UP              | UP              | UP              | UP              | UP              |
| NOCHANGE        | NOCHANGE        | NOCHANGE        | NOCHANGE        | NOCHANGE        |
| DOWN            | DOWN            | DOWN            | DOWN            | DOWN            |
| NOCHANGE        | UP              | NOCHANGE        | NOCHANGE        | NOCHANGE        |
| NOCHANGE        | NOCHANGE        | NOCHANGE        | UP              | NOCHANGE        |
| DOWN            | NOCHANGE        | DOWN            | DOWN            | DOWN            |
| NOCHANGE        | NOCHANGE        | NOCHANGE        | NOCHANGE        | DOWN            |
| NOCHANGE        | UP              | NOCHANGE        | NOCHANGE        | DOWN            |
| NOCHANGE        | NOCHANGE        | NOCHANGE        | NOCHANGE        | NOCHANGE        |
| NOCHANGE        | DOWN            | NOCHANGE        | NOCHANGE        | NOCHANGE        |
| NOCHANGE        | NOCHANGE        | DOWN            | NOCHANGE        | UP              |
| NOCHANGE        | NOCHANGE        | NOCHANGE        | NOCHANGE        | NOCHANGE        |
| NOCHANGE        | NOCHANGE        | NOCHANGE        | NOCHANGE        | NOCHANGE        |
| NOCHANGE        | NOCHANGE        | NOCHANGE        | DOWN            | DOWN            |
| NOCHANGE        | NOCHANGE        | NOCHANGE        | NOCHANGE        | NOCHANGE        |
| UP              | NOCHANGE        | NOCHANGE        | NOCHANGE        | UP              |
| DOWN            | NOCHANGE        | DOWN            | DOWN            | DOWN            |
| NOCHANGE        | DOWN            | UP              | NOCHANGE        | NOCHANGE        |
| DOWN            | NOCHANGE        | NOCHANGE        | NOCHANGE        | DOWN            |
| UP              | UP              | NOCHANGE        | NOCHANGE        | NOCHANGE        |
| UP              | NOCHANGE        | UP              | UP              | NOCHANGE        |
| UP              | NOCHANGE        | NOCHANGE        | NOCHANGE        | DOWN            |
| DOWN            | NOCHANGE        | NOCHANGE        | DOWN            | NOCHANGE        |
| DOWN            | DOWN            | NOCHANGE        | DOWN            | NOCHANGE        |
| NOCHANGE        | NOCHANGE        | NOCHANGE        | NOCHANGE        | DOWN            |
| NOCHANGE        | NOCHANGE        | NOCHANGE        | NOCHANGE        | NOCHANGE        |
| NOCHANGE        | NOCHANGE        | NOCHANGE        | NOCHANGE        | NOCHANGE        |
| NOCHANGE        | DOWN            | NOCHANGE        | NOCHANGE        | NOCHANGE        |
| NOCHANGE        | DOWN            | NOCHANGE        | NOCHANGE        | NOCHANGE        |
| DOWN            | NOCHANGE        | DOWN            | DOWN            | DOWN            |

| TCGA-CZ-4856-01 | TCGA-B0-4824-01 | TCGA-A3-3376-01 | TCGA-CJ-4635-01 | TCGA-BP-5183-01 |
|-----------------|-----------------|-----------------|-----------------|-----------------|
| NOCHANGE        | NOCHANGE        | NOCHANGE        | NOCHANGE        | NOCHANGE        |
| UP              | UP              | UP              | UP              | UP              |
| NOCHANGE        | NOCHANGE        | NOCHANGE        | NOCHANGE        | NOCHANGE        |
| DOWN            | DOWN            | DOWN            | DOWN            | DOWN            |
| NOCHANGE        | NOCHANGE        | NOCHANGE        | NOCHANGE        | NOCHANGE        |
| NOCHANGE        | NOCHANGE        | NOCHANGE        | NOCHANGE        | UP              |
| NOCHANGE        | DOWN            | NOCHANGE        | NOCHANGE        | DOWN            |
| NOCHANGE        | DOWN            | DOWN            | NOCHANGE        | NOCHANGE        |
| NOCHANGE        | NOCHANGE        | NOCHANGE        | DOWN            | NOCHANGE        |
| NOCHANGE        | NOCHANGE        | NOCHANGE        | NOCHANGE        | NOCHANGE        |
| NOCHANGE        | NOCHANGE        | NOCHANGE        | NOCHANGE        | NOCHANGE        |
| NOCHANGE        | NOCHANGE        | DOWN            | NOCHANGE        | DOWN            |
| NOCHANGE        | NOCHANGE        | NOCHANGE        | DOWN            | NOCHANGE        |
| NOCHANGE        | NOCHANGE        | NOCHANGE        | NOCHANGE        | NOCHANGE        |
| NOCHANGE        | NOCHANGE        | NOCHANGE        | NOCHANGE        | NOCHANGE        |
| NOCHANGE        | NOCHANGE        | NOCHANGE        | NOCHANGE        | NOCHANGE        |
| DOWN            | DOWN            | DOWN            | DOWN            | DOWN            |
| NOCHANGE        | UP              | NOCHANGE        | NOCHANGE        | NOCHANGE        |
| NOCHANGE        | NOCHANGE        | NOCHANGE        | NOCHANGE        | NOCHANGE        |
| NOCHANGE        | NOCHANGE        | DOWN            | DOWN            | NOCHANGE        |
| NOCHANGE        | NOCHANGE        | UP              | NOCHANGE        | NOCHANGE        |
| DOWN            | DOWN            | DOWN            | NOCHANGE        | NOCHANGE        |
| NOCHANGE        | UP              | UP              | UP              | NOCHANGE        |
| NOCHANGE        | NOCHANGE        | NOCHANGE        | UP              | UP              |
| NOCHANGE        | DOWN            | NOCHANGE        | NOCHANGE        | NOCHANGE        |
| NOCHANGE        | NOCHANGE        | DOWN            | DOWN            | NOCHANGE        |
| DOWN            | NOCHANGE        | DOWN            | DOWN            | NOCHANGE        |
| NOCHANGE        | NOCHANGE        | NOCHANGE        | DOWN            | NOCHANGE        |
| NOCHANGE        | NOCHANGE        | NOCHANGE        | NOCHANGE        | NOCHANGE        |
| NOCHANGE        | NOCHANGE        | NOCHANGE        | NOCHANGE        | NOCHANGE        |
| DOWN            | DOWN            | NOCHANGE        | NOCHANGE        | DOWN            |
| NOCHANGE        | NOCHANGE        | NOCHANGE        | NOCHANGE        | DOWN            |
| DOWN            | DOWN            | DOWN            | NOCHANGE        | NOCHANGE        |

| TCGA-A3-A8OV-0 | TCGA-B8-5159-01 | TCGA-B8-5163-01 | TCGA-CZ-5461-01 | TCGA-GK-A6C7-0 |
|----------------|-----------------|-----------------|-----------------|----------------|
| NOCHANGE       | NOCHANGE        | NOCHANGE        | NOCHANGE        | NOCHANGE       |
| UP             | UP              | UP              | UP              | NOCHANGE       |
| NOCHANGE       | NOCHANGE        | NOCHANGE        | NOCHANGE        | NOCHANGE       |
| DOWN           | NOCHANGE        | DOWN            | DOWN            | DOWN           |
| NOCHANGE       | NOCHANGE        | NOCHANGE        | UP              | NOCHANGE       |
| UP             | NOCHANGE        | NOCHANGE        | NOCHANGE        | NOCHANGE       |
| DOWN           | DOWN            | DOWN            | DOWN            | NOCHANGE       |
| NOCHANGE       | NOCHANGE        | NOCHANGE        | NOCHANGE        | NOCHANGE       |
| DOWN           | DOWN            | NOCHANGE        | DOWN            | UP             |
| NOCHANGE       | NOCHANGE        | DOWN            | DOWN            | NOCHANGE       |
| NOCHANGE       | DOWN            | DOWN            | DOWN            | NOCHANGE       |
| DOWN           | NOCHANGE        | UP              | DOWN            | DOWN           |
| NOCHANGE       | NOCHANGE        | NOCHANGE        | NOCHANGE        | NOCHANGE       |
| NOCHANGE       | NOCHANGE        | NOCHANGE        | NOCHANGE        | NOCHANGE       |
| DOWN           | DOWN            | DOWN            | DOWN            | DOWN           |
| NOCHANGE       | NOCHANGE        | NOCHANGE        | NOCHANGE        | UP             |
| NOCHANGE       | NOCHANGE        | NOCHANGE        | NOCHANGE        | UP             |
| NOCHANGE       | DOWN            | DOWN            | NOCHANGE        | NOCHANGE       |
| NOCHANGE       | NOCHANGE        | NOCHANGE        | UP              | NOCHANGE       |
| NOCHANGE       | DOWN            | DOWN            | DOWN            | NOCHANGE       |
| NOCHANGE       | NOCHANGE        | UP              | UP              | NOCHANGE       |
| NOCHANGE       | UP              | NOCHANGE        | NOCHANGE        | NOCHANGE       |
| DOWN           | NOCHANGE        | NOCHANGE        | NOCHANGE        | DOWN           |
| NOCHANGE       | NOCHANGE        | DOWN            | DOWN            | DOWN           |
| NOCHANGE       | NOCHANGE        | DOWN            | NOCHANGE        | DOWN           |
| NOCHANGE       | NOCHANGE        | NOCHANGE        | NOCHANGE        | DOWN           |
| NOCHANGE       | NOCHANGE        | NOCHANGE        | NOCHANGE        | NOCHANGE       |
| NOCHANGE       | NOCHANGE        | NOCHANGE        | NOCHANGE        | NOCHANGE       |
| NOCHANGE       | DOWN            | NOCHANGE        | NOCHANGE        | NOCHANGE       |
| DOWN           | NOCHANGE        | NOCHANGE        | NOCHANGE        | NOCHANGE       |
| NOCHANGE       | DOWN            | NOCHANGE        | NOCHANGE        | NOCHANGE       |
| DOWN           | NOCHANGE        | DOWN            | DOWN            | DOWN           |

| TCGA-BP-4771-01 | TCGA-BP-4803-01 | TCGA-B2-5639-01 | TCGA-CZ-5455-01 | TCGA-CJ-4897-01 |
|-----------------|-----------------|-----------------|-----------------|-----------------|
| NOCHANGE        | NOCHANGE        | NOCHANGE        | NOCHANGE        | NOCHANGE        |
| UP              | UP              | UP              | UP              | UP              |
| NOCHANGE        | NOCHANGE        | NOCHANGE        | NOCHANGE        | NOCHANGE        |
| DOWN            | DOWN            | DOWN            | DOWN            | DOWN            |
| UP              | UP              | NOCHANGE        | UP              | NOCHANGE        |
| NOCHANGE        | NOCHANGE        | NOCHANGE        | NOCHANGE        | UP              |
| DOWN            | DOWN            | DOWN            | DOWN            | DOWN            |
| NOCHANGE        | NOCHANGE        | DOWN            | NOCHANGE        | NOCHANGE        |
| NOCHANGE        | DOWN            | DOWN            | UP              | DOWN            |
| NOCHANGE        | DOWN            | NOCHANGE        | NOCHANGE        | NOCHANGE        |
| NOCHANGE        | DOWN            | NOCHANGE        | NOCHANGE        | DOWN            |
| NOCHANGE        | UP              | DOWN            | NOCHANGE        | NOCHANGE        |
| NOCHANGE        | NOCHANGE        | NOCHANGE        | NOCHANGE        | NOCHANGE        |
| NOCHANGE        | NOCHANGE        | NOCHANGE        | NOCHANGE        | NOCHANGE        |
| NOCHANGE        | DOWN            | DOWN            | DOWN            | NOCHANGE        |
| NOCHANGE        | NOCHANGE        | NOCHANGE        | UP              | NOCHANGE        |
| NOCHANGE        | NOCHANGE        | UP              | UP              | NOCHANGE        |
| DOWN            | DOWN            | NOCHANGE        | DOWN            | NOCHANGE        |
| NOCHANGE        | UP              | NOCHANGE        | NOCHANGE        | NOCHANGE        |
| DOWN            | NOCHANGE        | NOCHANGE        | NOCHANGE        | NOCHANGE        |
| UP              | NOCHANGE        | UP              | UP              | NOCHANGE        |
| NOCHANGE        | UP              | NOCHANGE        | NOCHANGE        | UP              |
| DOWN            | NOCHANGE        | NOCHANGE        | NOCHANGE        | DOWN            |
| DOWN            | DOWN            | NOCHANGE        | DOWN            | DOWN            |
| DOWN            | DOWN            | NOCHANGE        | NOCHANGE        | NOCHANGE        |
| DOWN            | DOWN            | NOCHANGE        | NOCHANGE        | NOCHANGE        |
| NOCHANGE        | NOCHANGE        | NOCHANGE        | NOCHANGE        | NOCHANGE        |
| NOCHANGE        | NOCHANGE        | NOCHANGE        | NOCHANGE        | NOCHANGE        |
| DOWN            | NOCHANGE        | NOCHANGE        | NOCHANGE        | NOCHANGE        |
| NOCHANGE        | NOCHANGE        | NOCHANGE        | NOCHANGE        | NOCHANGE        |
| DOWN            | NOCHANGE        | NOCHANGE        | DOWN            | NOCHANGE        |
| DOWN            | DOWN            | NOCHANGE        | NOCHANGE        | DOWN            |

| TCGA-B0-5107-01. | TCGA-BP-4759-01. | TCGA-B0-4836-01. | TCGA-B8-A7U6-01 | TCGA-B2-5636-01. |
|------------------|------------------|------------------|-----------------|------------------|
| UP               | NOCHANGE         | NOCHANGE         | NOCHANGE        | DOWN             |
| NOCHANGE         | UP               | UP               | UP              | NOCHANGE         |
| NOCHANGE         | NOCHANGE         | NOCHANGE         | NOCHANGE        | NOCHANGE         |
| DOWN             | DOWN             | DOWN             | DOWN            | DOWN             |
| UP               | NOCHANGE         | NOCHANGE         | UP              | DOWN             |
| NOCHANGE         | NOCHANGE         | NOCHANGE         | NOCHANGE        | NOCHANGE         |
| DOWN             | DOWN             | NOCHANGE         | DOWN            | DOWN             |
| DOWN             | NOCHANGE         | NOCHANGE         | NOCHANGE        | NOCHANGE         |
| NOCHANGE         | NOCHANGE         | NOCHANGE         | NOCHANGE        | NOCHANGE         |
| NOCHANGE         | DOWN             | NOCHANGE         | NOCHANGE        | NOCHANGE         |
| NOCHANGE         | DOWN             | NOCHANGE         | NOCHANGE        | NOCHANGE         |
| DOWN             | DOWN             | NOCHANGE         | NOCHANGE        | UP               |
| NOCHANGE         | NOCHANGE         | NOCHANGE         | NOCHANGE        | DOWN             |
| NOCHANGE         | DOWN             | NOCHANGE         | NOCHANGE        | NOCHANGE         |
| DOWN             | NOCHANGE         | NOCHANGE         | DOWN            | NOCHANGE         |
| DOWN             | NOCHANGE         | NOCHANGE         | NOCHANGE        | NOCHANGE         |
| UP               | NOCHANGE         | NOCHANGE         | UP              | NOCHANGE         |
| NOCHANGE         | NOCHANGE         | NOCHANGE         | NOCHANGE        | DOWN             |
| NOCHANGE         | NOCHANGE         | NOCHANGE         | NOCHANGE        | NOCHANGE         |
| DOWN             | DOWN             | NOCHANGE         | DOWN            | DOWN             |
| NOCHANGE         | NOCHANGE         | NOCHANGE         | NOCHANGE        | UP               |
| NOCHANGE         | NOCHANGE         | UP               | NOCHANGE        | NOCHANGE         |
| DOWN             | DOWN             | NOCHANGE         | DOWN            | NOCHANGE         |
| NOCHANGE         | NOCHANGE         | DOWN             | NOCHANGE        | DOWN             |
| DOWN             | DOWN             | DOWN             | DOWN            | DOWN             |
| NOCHANGE         | NOCHANGE         | NOCHANGE         | NOCHANGE        | NOCHANGE         |
| NOCHANGE         | NOCHANGE         | NOCHANGE         | NOCHANGE        | NOCHANGE         |
| NOCHANGE         | NOCHANGE         | NOCHANGE         | UP              | NOCHANGE         |
| DOWN             | DOWN             | DOWN             | NOCHANGE        | DOWN             |
| DOWN             | DOWN             | NOCHANGE         | UP              | NOCHANGE         |
| DOWN             | DOWN             | NOCHANGE         | DOWN            | NOCHANGE         |

| TCGA-A3-3382-01 | TCGA-CZ-5464-01 | TCGA-CJ-4634-01 | TCGA-CJ-6028-01 | TCGA-BP-4804-01 |
|-----------------|-----------------|-----------------|-----------------|-----------------|
| NOCHANGE        | NOCHANGE        | NOCHANGE        | NOCHANGE        | NOCHANGE        |
| UP              | UP              | UP              | UP              | UP              |
| NOCHANGE        | NOCHANGE        | NOCHANGE        | NOCHANGE        | NOCHANGE        |
| DOWN            | DOWN            | DOWN            | DOWN            | DOWN            |
| UP              | NOCHANGE        | DOWN            | UP              | NOCHANGE        |
| UP              | NOCHANGE        | UP              | NOCHANGE        | NOCHANGE        |
| DOWN            | DOWN            | DOWN            | DOWN            | NOCHANGE        |
| NOCHANGE        | NOCHANGE        | NOCHANGE        | NOCHANGE        | NOCHANGE        |
| UP              | NOCHANGE        | UP              | UP              | NOCHANGE        |
| NOCHANGE        | NOCHANGE        | NOCHANGE        | DOWN            | NOCHANGE        |
| NOCHANGE        | NOCHANGE        | NOCHANGE        | NOCHANGE        | NOCHANGE        |
| NOCHANGE        | NOCHANGE        | NOCHANGE        | NOCHANGE        | NOCHANGE        |
| NOCHANGE        | NOCHANGE        | NOCHANGE        | NOCHANGE        | NOCHANGE        |
| NOCHANGE        | NOCHANGE        | NOCHANGE        | NOCHANGE        | NOCHANGE        |
| DOWN            | DOWN            | DOWN            | DOWN            | NOCHANGE        |
| NOCHANGE        | NOCHANGE        | NOCHANGE        | UP              | NOCHANGE        |
| NOCHANGE        | NOCHANGE        | UP              | NOCHANGE        | NOCHANGE        |
| DOWN            | NOCHANGE        | DOWN            | DOWN            | DOWN            |
| UP              | UP              | UP              | UP              | NOCHANGE        |
| UP              | NOCHANGE        | DOWN            | UP              | NOCHANGE        |
| UP              | UP              | NOCHANGE        | UP              | UP              |
| UP              | NOCHANGE        | UP              | UP              | NOCHANGE        |
| UP              | NOCHANGE        | NOCHANGE        | UP              | NOCHANGE        |
| DOWN            | NOCHANGE        | DOWN            | DOWN            | DOWN            |
| DOWN            | DOWN            | NOCHANGE        | DOWN            | DOWN            |
| DOWN            | DOWN            | NOCHANGE        | NOCHANGE        | NOCHANGE        |
| NOCHANGE        | NOCHANGE        | NOCHANGE        | NOCHANGE        | NOCHANGE        |
| NOCHANGE        | NOCHANGE        | NOCHANGE        | NOCHANGE        | NOCHANGE        |
| NOCHANGE        | NOCHANGE        | NOCHANGE        | NOCHANGE        | NOCHANGE        |
| NOCHANGE        | NOCHANGE        | NOCHANGE        | NOCHANGE        | DOWN            |
| NOCHANGE        | NOCHANGE        | NOCHANGE        | NOCHANGE        | NOCHANGE        |
| DOWN            | NOCHANGE        | DOWN            | DOWN            | DOWN            |

| TCGA-CJ-4912-01 | TCGA-CJ-4873-01 | TCGA-CJ-4894-01 | TCGA-CW-5588-01 | TCGA-A3-3325-01 |
|-----------------|-----------------|-----------------|-----------------|-----------------|
| NOCHANGE        | NOCHANGE        | NOCHANGE        | UP              | NOCHANGE        |
| UP              | UP              | UP              | UP              | UP              |
| NOCHANGE        | NOCHANGE        | NOCHANGE        | NOCHANGE        | NOCHANGE        |
| DOWN            | DOWN            | NOCHANGE        | DOWN            | DOWN            |
| UP              | NOCHANGE        | NOCHANGE        | UP              | NOCHANGE        |
| NOCHANGE        | DOWN            | NOCHANGE        | NOCHANGE        | UP              |
| NOCHANGE        | DOWN            | NOCHANGE        | DOWN            | NOCHANGE        |
| NOCHANGE        | NOCHANGE        | DOWN            | NOCHANGE        | DOWN            |
| UP              | NOCHANGE        | DOWN            | DOWN            | NOCHANGE        |
| NOCHANGE        | NOCHANGE        | NOCHANGE        | NOCHANGE        | NOCHANGE        |
| DOWN            | NOCHANGE        | DOWN            | DOWN            | NOCHANGE        |
| NOCHANGE        | NOCHANGE        | NOCHANGE        | NOCHANGE        | NOCHANGE        |
| NOCHANGE        | NOCHANGE        | NOCHANGE        | NOCHANGE        | NOCHANGE        |
| DOWN            | DOWN            | NOCHANGE        | NOCHANGE        | NOCHANGE        |
| DOWN            | DOWN            | DOWN            | DOWN            | DOWN            |
| DOWN            | NOCHANGE        | NOCHANGE        | NOCHANGE        | NOCHANGE        |
| DOWN            | NOCHANGE        | UP              | NOCHANGE        | NOCHANGE        |
| DOWN            | NOCHANGE        | DOWN            | DOWN            | DOWN            |
| NOCHANGE        | NOCHANGE        | UP              | UP              | NOCHANGE        |
| NOCHANGE        | DOWN            | DOWN            | NOCHANGE        | DOWN            |
| NOCHANGE        | NOCHANGE        | UP              | UP              | UP              |
| NOCHANGE        | NOCHANGE        | UP              | NOCHANGE        | UP              |
| DOWN            | DOWN            | NOCHANGE        | UP              | NOCHANGE        |
| DOWN            | NOCHANGE        | DOWN            | NOCHANGE        | DOWN            |
| DOWN            | DOWN            | NOCHANGE        | DOWN            | NOCHANGE        |
| DOWN            | NOCHANGE        | NOCHANGE        | NOCHANGE        | NOCHANGE        |
| NOCHANGE        | NOCHANGE        | NOCHANGE        | NOCHANGE        | NOCHANGE        |
| NOCHANGE        | NOCHANGE        | NOCHANGE        | NOCHANGE        | NOCHANGE        |
| NOCHANGE        | NOCHANGE        | NOCHANGE        | NOCHANGE        | NOCHANGE        |
| DOWN            | DOWN            | NOCHANGE        | DOWN            | NOCHANGE        |
| NOCHANGE        | NOCHANGE        | NOCHANGE        | NOCHANGE        | NOCHANGE        |
| DOWN            | DOWN            | DOWN            | NOCHANGE        | DOWN            |

| TCGA-CJ-4871-01 | TCGA-CJ-4640-01 | TCGA-BP-4762-01 | TCGA-B0-5094-01 | TCGA-CZ-5467-01 |
|-----------------|-----------------|-----------------|-----------------|-----------------|
| NOCHANGE        | NOCHANGE        | NOCHANGE        | NOCHANGE        | NOCHANGE        |
| UP              | UP              | UP              | UP              | UP              |
| NOCHANGE        | NOCHANGE        | NOCHANGE        | NOCHANGE        | NOCHANGE        |
| DOWN            | DOWN            | NOCHANGE        | DOWN            | DOWN            |
| UP              | UP              | NOCHANGE        | UP              | UP              |
| UP              | NOCHANGE        | NOCHANGE        | UP              | NOCHANGE        |
| DOWN            | NOCHANGE        | DOWN            | DOWN            | NOCHANGE        |
| NOCHANGE        | DOWN            | NOCHANGE        | NOCHANGE        | UP              |
| NOCHANGE        | UP              | NOCHANGE        | NOCHANGE        | DOWN            |
| DOWN            | NOCHANGE        | DOWN            | NOCHANGE        | NOCHANGE        |
| NOCHANGE        | NOCHANGE        | DOWN            | NOCHANGE        | DOWN            |
| DOWN            | DOWN            | NOCHANGE        | UP              | DOWN            |
| NOCHANGE        | NOCHANGE        | NOCHANGE        | NOCHANGE        | NOCHANGE        |
| DOWN            | NOCHANGE        | NOCHANGE        | NOCHANGE        | NOCHANGE        |
| DOWN            | NOCHANGE        | NOCHANGE        | DOWN            | DOWN            |
| NOCHANGE        | NOCHANGE        | NOCHANGE        | NOCHANGE        | NOCHANGE        |
| NOCHANGE        | NOCHANGE        | NOCHANGE        | NOCHANGE        | NOCHANGE        |
| DOWN            | NOCHANGE        | NOCHANGE        | NOCHANGE        | NOCHANGE        |
| NOCHANGE        | NOCHANGE        | NOCHANGE        | NOCHANGE        | NOCHANGE        |
| NOCHANGE        | NOCHANGE        | DOWN            | DOWN            | DOWN            |
| NOCHANGE        | NOCHANGE        | NOCHANGE        | UP              | NOCHANGE        |
| NOCHANGE        | NOCHANGE        | DOWN            | UP              | DOWN            |
| NOCHANGE        | UP              | UP              | NOCHANGE        | NOCHANGE        |
| UP              | UP              | NOCHANGE        | NOCHANGE        | NOCHANGE        |
| NOCHANGE        | DOWN            | NOCHANGE        | UP              | NOCHANGE        |
| DOWN            | NOCHANGE        | NOCHANGE        | DOWN            | NOCHANGE        |
| DOWN            | NOCHANGE        | NOCHANGE        | DOWN            | NOCHANGE        |
| NOCHANGE        | NOCHANGE        | NOCHANGE        | DOWN            | NOCHANGE        |
| NOCHANGE        | NOCHANGE        | NOCHANGE        | NOCHANGE        | NOCHANGE        |
| NOCHANGE        | NOCHANGE        | NOCHANGE        | NOCHANGE        | NOCHANGE        |
| NOCHANGE        | NOCHANGE        | NOCHANGE        | NOCHANGE        | NOCHANGE        |
| NOCHANGE        | NOCHANGE        | NOCHANGE        | DOWN            | NOCHANGE        |
| NOCHANGE        | NOCHANGE        | NOCHANGE        | DOWN            | NOCHANGE        |
| NOCHANGE        | DOWN            | DOWN            | DOWN            | DOWN            |



| TCGA-A3-3363-01 | TCGA-CZ-5468-01 | TCGA-B2-3924-01 | TCGA-BP-5181-01 | TCGA-B8-5553-01 |
|-----------------|-----------------|-----------------|-----------------|-----------------|
| NOCHANGE        | UP              | NOCHANGE        | NOCHANGE        | NOCHANGE        |
| NOCHANGE        | UP              | NOCHANGE        | UP              | UP              |
| NOCHANGE        | NOCHANGE        | NOCHANGE        | NOCHANGE        | NOCHANGE        |
| NOCHANGE        | DOWN            | UP              | DOWN            | DOWN            |
| NOCHANGE        | NOCHANGE        | NOCHANGE        | NOCHANGE        | UP              |
| NOCHANGE        | NOCHANGE        | NOCHANGE        | UP              | NOCHANGE        |
| NOCHANGE        | DOWN            | NOCHANGE        | DOWN            | DOWN            |
| DOWN            | NOCHANGE        | NOCHANGE        | NOCHANGE        | NOCHANGE        |
| NOCHANGE        | NOCHANGE        | NOCHANGE        | DOWN            | NOCHANGE        |
| NOCHANGE        | DOWN            | NOCHANGE        | NOCHANGE        | NOCHANGE        |
| NOCHANGE        | NOCHANGE        | NOCHANGE        | NOCHANGE        | DOWN            |
| NOCHANGE        | NOCHANGE        | UP              | DOWN            | UP              |
| NOCHANGE        | DOWN            | NOCHANGE        | NOCHANGE        | NOCHANGE        |
| UP              | NOCHANGE        | NOCHANGE        | NOCHANGE        | NOCHANGE        |
| DOWN            | DOWN            | DOWN            | NOCHANGE        | DOWN            |
| UP              | NOCHANGE        | UP              | NOCHANGE        | UP              |
| NOCHANGE        | NOCHANGE        | UP              | NOCHANGE        | NOCHANGE        |
| DOWN            | UP              | DOWN            | NOCHANGE        | DOWN            |
| UP              | NOCHANGE        | UP              | UP              | NOCHANGE        |
| NOCHANGE        | UP              | NOCHANGE        | DOWN            | UP              |
| UP              | NOCHANGE        | UP              | NOCHANGE        | UP              |
| DOWN            | NOCHANGE        | NOCHANGE        | NOCHANGE        | NOCHANGE        |
| NOCHANGE        | NOCHANGE        | NOCHANGE        | NOCHANGE        | DOWN            |
| NOCHANGE        | DOWN            | DOWN            | NOCHANGE        | DOWN            |
| NOCHANGE        | DOWN            | DOWN            | NOCHANGE        | NOCHANGE        |
| DOWN            | NOCHANGE        | DOWN            | NOCHANGE        | NOCHANGE        |
| NOCHANGE        | NOCHANGE        | NOCHANGE        | NOCHANGE        | NOCHANGE        |
| NOCHANGE        | NOCHANGE        | DOWN            | NOCHANGE        | NOCHANGE        |
| NOCHANGE        | DOWN            | NOCHANGE        | NOCHANGE        | DOWN            |
| DOWN            | NOCHANGE        | NOCHANGE        | NOCHANGE        | NOCHANGE        |
| NOCHANGE        | NOCHANGE        | DOWN            | DOWN            | DOWN            |

| TCGA-BP-4761-01 | TCGA-B2-5633-01 | TCGA-A3-3358-01 | TCGA-CZ-4864-01 | TCGA-AK-3436-01 |
|-----------------|-----------------|-----------------|-----------------|-----------------|
| NOCHANGE        | NOCHANGE        | NOCHANGE        | NOCHANGE        | UP              |
| UP              | UP              | UP              | UP              | NOCHANGE        |
| NOCHANGE        | NOCHANGE        | NOCHANGE        | NOCHANGE        | NOCHANGE        |
| DOWN            | NOCHANGE        | DOWN            | DOWN            | DOWN            |
| UP              | UP              | UP              | NOCHANGE        | NOCHANGE        |
| DOWN            | NOCHANGE        | NOCHANGE        | NOCHANGE        | NOCHANGE        |
| NOCHANGE        | DOWN            | NOCHANGE        | DOWN            | DOWN            |
| NOCHANGE        | NOCHANGE        | NOCHANGE        | DOWN            | NOCHANGE        |
| UP              | DOWN            | NOCHANGE        | NOCHANGE        | NOCHANGE        |
| NOCHANGE        | NOCHANGE        | NOCHANGE        | NOCHANGE        | DOWN            |
| NOCHANGE        | DOWN            | DOWN            | NOCHANGE        | DOWN            |
| UP              | NOCHANGE        | DOWN            | DOWN            | NOCHANGE        |
| NOCHANGE        | DOWN            | NOCHANGE        | NOCHANGE        | NOCHANGE        |
| DOWN            | NOCHANGE        | NOCHANGE        | NOCHANGE        | DOWN            |
| DOWN            | DOWN            | DOWN            | DOWN            | DOWN            |
| DOWN            | NOCHANGE        | NOCHANGE        | UP              | NOCHANGE        |
| DOWN            | UP              | NOCHANGE        | NOCHANGE        | DOWN            |
| NOCHANGE        | NOCHANGE        | DOWN            | NOCHANGE        | NOCHANGE        |
| NOCHANGE        | NOCHANGE        | NOCHANGE        | NOCHANGE        | NOCHANGE        |
| NOCHANGE        | NOCHANGE        | DOWN            | UP              | UP              |
| NOCHANGE        | UP              | UP              | UP              | NOCHANGE        |
| NOCHANGE        | DOWN            | NOCHANGE        | NOCHANGE        | UP              |
| DOWN            | UP              | NOCHANGE        | DOWN            | NOCHANGE        |
| UP              | DOWN            | NOCHANGE        | DOWN            | NOCHANGE        |
| DOWN            | NOCHANGE        | DOWN            | NOCHANGE        | DOWN            |
| NOCHANGE        | NOCHANGE        | NOCHANGE        | DOWN            | NOCHANGE        |
| NOCHANGE        | NOCHANGE        | NOCHANGE        | NOCHANGE        | UP              |
| NOCHANGE        | DOWN            | NOCHANGE        | NOCHANGE        | DOWN            |
| DOWN            | DOWN            | NOCHANGE        | NOCHANGE        | DOWN            |
| DOWN            | DOWN            | NOCHANGE        | NOCHANGE        | NOCHANGE        |
| DOWN            | UP              | NOCHANGE        | DOWN            | DOWN            |

| TCGA-CZ-5466-01 | TCGA-B0-5080-01 | TCGA-CZ-4861-01 | TCGA-CJ-5671-01 | TCGA-AK-3431-01 |
|-----------------|-----------------|-----------------|-----------------|-----------------|
| UP              | NOCHANGE        | NOCHANGE        | NOCHANGE        | NOCHANGE        |
| UP              | NOCHANGE        | UP              | UP              | NOCHANGE        |
| NOCHANGE        | NOCHANGE        | NOCHANGE        | NOCHANGE        | NOCHANGE        |
| DOWN            | DOWN            | DOWN            | DOWN            | DOWN            |
| NOCHANGE        | NOCHANGE        | UP              | NOCHANGE        | NOCHANGE        |
| UP              | NOCHANGE        | NOCHANGE        | NOCHANGE        | NOCHANGE        |
| DOWN            | DOWN            | DOWN            | NOCHANGE        | DOWN            |
| NOCHANGE        | NOCHANGE        | NOCHANGE        | NOCHANGE        | NOCHANGE        |
| NOCHANGE        | NOCHANGE        | NOCHANGE        | NOCHANGE        | NOCHANGE        |
| NOCHANGE        | DOWN            | NOCHANGE        | NOCHANGE        | DOWN            |
| DOWN            | NOCHANGE        | NOCHANGE        | DOWN            | DOWN            |
| DOWN            | UP              | DOWN            | NOCHANGE        | DOWN            |
| NOCHANGE        | NOCHANGE        | NOCHANGE        | NOCHANGE        | NOCHANGE        |
| NOCHANGE        | NOCHANGE        | UP              | NOCHANGE        | NOCHANGE        |
| NOCHANGE        | NOCHANGE        | DOWN            | NOCHANGE        | DOWN            |
| NOCHANGE        | NOCHANGE        | NOCHANGE        | NOCHANGE        | NOCHANGE        |
| NOCHANGE        | NOCHANGE        | NOCHANGE        | NOCHANGE        | NOCHANGE        |
| NOCHANGE        | NOCHANGE        | NOCHANGE        | NOCHANGE        | NOCHANGE        |
| DOWN            | DOWN            | DOWN            | DOWN            | DOWN            |
| NOCHANGE        | NOCHANGE        | NOCHANGE        | NOCHANGE        | NOCHANGE        |
| NOCHANGE        | DOWN            | NOCHANGE        | DOWN            | NOCHANGE        |
| UP              | NOCHANGE        | UP              | UP              | NOCHANGE        |
| NOCHANGE        | UP              | NOCHANGE        | NOCHANGE        | NOCHANGE        |
| UP              | NOCHANGE        | NOCHANGE        | NOCHANGE        | NOCHANGE        |
| NOCHANGE        | DOWN            | NOCHANGE        | NOCHANGE        | NOCHANGE        |
| DOWN            | DOWN            | DOWN            | DOWN            | DOWN            |
| NOCHANGE        | NOCHANGE        | NOCHANGE        | NOCHANGE        | NOCHANGE        |
| NOCHANGE        | NOCHANGE        | NOCHANGE        | NOCHANGE        | NOCHANGE        |
| NOCHANGE        | NOCHANGE        | NOCHANGE        | NOCHANGE        | NOCHANGE        |
| DOWN            | NOCHANGE        | NOCHANGE        | NOCHANGE        | NOCHANGE        |
| NOCHANGE        | NOCHANGE        | NOCHANGE        | NOCHANGE        | NOCHANGE        |
| DOWN            | DOWN            | NOCHANGE        | DOWN            | DOWN            |

|                  |                 |                 |                 |                  |
|------------------|-----------------|-----------------|-----------------|------------------|
| TCGA-B0-4811-01. | TCGA-A3-3313-01 | TCGA-B8-5552-01 | TCGA-CJ-6027-01 | TCGA-BP-4756-01. |
| NOCHANGE         | NOCHANGE        | NOCHANGE        | NOCHANGE        | NOCHANGE         |
| UP               | NOCHANGE        | UP              | UP              | UP               |
| NOCHANGE         | NOCHANGE        | NOCHANGE        | NOCHANGE        | NOCHANGE         |
| DOWN             | DOWN            | DOWN            | DOWN            | NOCHANGE         |
| NOCHANGE         | NOCHANGE        | NOCHANGE        | UP              | NOCHANGE         |
| NOCHANGE         | NOCHANGE        | NOCHANGE        | NOCHANGE        | NOCHANGE         |
| NOCHANGE         | NOCHANGE        | NOCHANGE        | NOCHANGE        | NOCHANGE         |
| NOCHANGE         | DOWN            | NOCHANGE        | NOCHANGE        | NOCHANGE         |
| NOCHANGE         | NOCHANGE        | DOWN            | NOCHANGE        | NOCHANGE         |
| NOCHANGE         | NOCHANGE        | NOCHANGE        | DOWN            | NOCHANGE         |
| NOCHANGE         | DOWN            | NOCHANGE        | NOCHANGE        | DOWN             |
| NOCHANGE         | NOCHANGE        | DOWN            | DOWN            | NOCHANGE         |
| NOCHANGE         | NOCHANGE        | NOCHANGE        | NOCHANGE        | NOCHANGE         |
| NOCHANGE         | NOCHANGE        | NOCHANGE        | NOCHANGE        | NOCHANGE         |
| DOWN             | DOWN            | NOCHANGE        | DOWN            | DOWN             |
| NOCHANGE         | UP              | NOCHANGE        | NOCHANGE        | UP               |
| DOWN             | NOCHANGE        | UP              | NOCHANGE        | NOCHANGE         |
| DOWN             | DOWN            | DOWN            | NOCHANGE        | NOCHANGE         |
| NOCHANGE         | NOCHANGE        | NOCHANGE        | NOCHANGE        | NOCHANGE         |
| DOWN             | NOCHANGE        | NOCHANGE        | DOWN            | NOCHANGE         |
| NOCHANGE         | NOCHANGE        | UP              | NOCHANGE        | NOCHANGE         |
| NOCHANGE         | NOCHANGE        | NOCHANGE        | NOCHANGE        | NOCHANGE         |
| DOWN             | NOCHANGE        | NOCHANGE        | NOCHANGE        | NOCHANGE         |
| DOWN             | DOWN            | DOWN            | NOCHANGE        | NOCHANGE         |
| DOWN             | NOCHANGE        | DOWN            | DOWN            | NOCHANGE         |
| NOCHANGE         | NOCHANGE        | NOCHANGE        | NOCHANGE        | NOCHANGE         |
| UP               | NOCHANGE        | NOCHANGE        | NOCHANGE        | NOCHANGE         |
| NOCHANGE         | NOCHANGE        | NOCHANGE        | NOCHANGE        | DOWN             |
| DOWN             | DOWN            | NOCHANGE        | NOCHANGE        | NOCHANGE         |
| NOCHANGE         | NOCHANGE        | NOCHANGE        | DOWN            | DOWN             |
| DOWN             | UP              | DOWN            | DOWN            | NOCHANGE         |

| TCGA-A3-3319-01 | TCGA-MW-A4EC-01 | TCGA-B0-4816-01 | TCGA-CZ-4863-01 | TCGA-B0-5110-01 |
|-----------------|-----------------|-----------------|-----------------|-----------------|
| UP              | NOCHANGE        | NOCHANGE        | NOCHANGE        | NOCHANGE        |
| UP              | UP              | UP              | UP              | UP              |
| NOCHANGE        | NOCHANGE        | NOCHANGE        | NOCHANGE        | NOCHANGE        |
| DOWN            | DOWN            | DOWN            | DOWN            | NOCHANGE        |
| UP              | NOCHANGE        | UP              | UP              | NOCHANGE        |
| NOCHANGE        | UP              | NOCHANGE        | UP              | NOCHANGE        |
| DOWN            | NOCHANGE        | DOWN            | DOWN            | DOWN            |
| NOCHANGE        | NOCHANGE        | NOCHANGE        | NOCHANGE        | DOWN            |
| UP              | DOWN            | NOCHANGE        | NOCHANGE        | DOWN            |
| NOCHANGE        | NOCHANGE        | NOCHANGE        | NOCHANGE        | NOCHANGE        |
| NOCHANGE        | NOCHANGE        | NOCHANGE        | NOCHANGE        | NOCHANGE        |
| UP              | UP              | UP              | DOWN            | NOCHANGE        |
| NOCHANGE        | NOCHANGE        | NOCHANGE        | NOCHANGE        | NOCHANGE        |
| NOCHANGE        | NOCHANGE        | NOCHANGE        | NOCHANGE        | NOCHANGE        |
| DOWN            | DOWN            | NOCHANGE        | DOWN            | DOWN            |
| DOWN            | NOCHANGE        | NOCHANGE        | NOCHANGE        | NOCHANGE        |
| NOCHANGE        | NOCHANGE        | NOCHANGE        | UP              | UP              |
| NOCHANGE        | NOCHANGE        | DOWN            | NOCHANGE        | DOWN            |
| UP              | NOCHANGE        | NOCHANGE        | NOCHANGE        | NOCHANGE        |
| UP              | NOCHANGE        | DOWN            | NOCHANGE        | DOWN            |
| UP              | NOCHANGE        | UP              | UP              | UP              |
| NOCHANGE        | NOCHANGE        | UP              | NOCHANGE        | UP              |
| UP              | DOWN            | DOWN            | NOCHANGE        | NOCHANGE        |
| DOWN            | NOCHANGE        | DOWN            | DOWN            | DOWN            |
| NOCHANGE        | NOCHANGE        | NOCHANGE        | NOCHANGE        | NOCHANGE        |
| NOCHANGE        | DOWN            | DOWN            | DOWN            | NOCHANGE        |
| NOCHANGE        | NOCHANGE        | NOCHANGE        | NOCHANGE        | NOCHANGE        |
| NOCHANGE        | NOCHANGE        | NOCHANGE        | NOCHANGE        | NOCHANGE        |
| NOCHANGE        | NOCHANGE        | NOCHANGE        | NOCHANGE        | NOCHANGE        |
| DOWN            | NOCHANGE        | NOCHANGE        | NOCHANGE        | NOCHANGE        |
| NOCHANGE        | NOCHANGE        | NOCHANGE        | NOCHANGE        | NOCHANGE        |
| DOWN            | DOWN            | DOWN            | DOWN            | DOWN            |

| TCGA-CZ-5986-01 | TCGA-B0-4828-01 | TCGA-B8-4151-01 | TCGA-EU-5905-01 | TCGA-CJ-4903-01 |
|-----------------|-----------------|-----------------|-----------------|-----------------|
| NOCHANGE        | NOCHANGE        | UP              | NOCHANGE        | NOCHANGE        |
| UP              | UP              | UP              | UP              | UP              |
| NOCHANGE        | NOCHANGE        | NOCHANGE        | NOCHANGE        | NOCHANGE        |
| DOWN            | DOWN            | DOWN            | DOWN            | DOWN            |
| NOCHANGE        | NOCHANGE        | NOCHANGE        | NOCHANGE        | NOCHANGE        |
| UP              | NOCHANGE        | NOCHANGE        | DOWN            | NOCHANGE        |
| DOWN            | NOCHANGE        | DOWN            | DOWN            | NOCHANGE        |
| DOWN            | NOCHANGE        | NOCHANGE        | NOCHANGE        | NOCHANGE        |
| UP              | NOCHANGE        | DOWN            | DOWN            | NOCHANGE        |
| DOWN            | NOCHANGE        | NOCHANGE        | DOWN            | NOCHANGE        |
| NOCHANGE        | NOCHANGE        | NOCHANGE        | NOCHANGE        | NOCHANGE        |
| DOWN            | NOCHANGE        | DOWN            | NOCHANGE        | DOWN            |
| NOCHANGE        | NOCHANGE        | NOCHANGE        | NOCHANGE        | NOCHANGE        |
| NOCHANGE        | DOWN            | NOCHANGE        | NOCHANGE        | NOCHANGE        |
| DOWN            | DOWN            | DOWN            | DOWN            | DOWN            |
| UP              | NOCHANGE        | NOCHANGE        | NOCHANGE        | NOCHANGE        |
| NOCHANGE        | NOCHANGE        | NOCHANGE        | NOCHANGE        | NOCHANGE        |
| DOWN            | NOCHANGE        | NOCHANGE        | NOCHANGE        | DOWN            |
| UP              | UP              | NOCHANGE        | NOCHANGE        | UP              |
| NOCHANGE        | NOCHANGE        | DOWN            | NOCHANGE        | NOCHANGE        |
| NOCHANGE        | NOCHANGE        | NOCHANGE        | NOCHANGE        | NOCHANGE        |
| NOCHANGE        | NOCHANGE        | NOCHANGE        | NOCHANGE        | NOCHANGE        |
| UP              | NOCHANGE        | DOWN            | DOWN            | NOCHANGE        |
| DOWN            | NOCHANGE        | NOCHANGE        | DOWN            | NOCHANGE        |
| DOWN            | DOWN            | NOCHANGE        | DOWN            | DOWN            |
| DOWN            | DOWN            | DOWN            | NOCHANGE        | NOCHANGE        |
| NOCHANGE        | UP              | NOCHANGE        | NOCHANGE        | NOCHANGE        |
| NOCHANGE        | NOCHANGE        | NOCHANGE        | NOCHANGE        | NOCHANGE        |
| NOCHANGE        | NOCHANGE        | NOCHANGE        | DOWN            | NOCHANGE        |
| NOCHANGE        | NOCHANGE        | NOCHANGE        | DOWN            | NOCHANGE        |
| DOWN            | NOCHANGE        | DOWN            | NOCHANGE        | DOWN            |

| TCGA-B0-5698-01 | TCGA-B0-4815-01 | TCGA-B0-5081-01 | TCGA-A3-3352-01 | TCGA-A3-A6NJ-01 |
|-----------------|-----------------|-----------------|-----------------|-----------------|
| NOCHANGE        | UP              | NOCHANGE        | NOCHANGE        | NOCHANGE        |
| UP              | UP              | UP              | UP              | UP              |
| NOCHANGE        | NOCHANGE        | NOCHANGE        | NOCHANGE        | NOCHANGE        |
| DOWN            | DOWN            | DOWN            | DOWN            | DOWN            |
| UP              | UP              | NOCHANGE        | NOCHANGE        | NOCHANGE        |
| UP              | NOCHANGE        | NOCHANGE        | UP              | UP              |
| DOWN            | DOWN            | DOWN            | NOCHANGE        | NOCHANGE        |
| NOCHANGE        | NOCHANGE        | NOCHANGE        | DOWN            | NOCHANGE        |
| DOWN            | UP              | NOCHANGE        | NOCHANGE        | NOCHANGE        |
| NOCHANGE        | NOCHANGE        | NOCHANGE        | NOCHANGE        | NOCHANGE        |
| NOCHANGE        | NOCHANGE        | NOCHANGE        | NOCHANGE        | NOCHANGE        |
| DOWN            | NOCHANGE        | NOCHANGE        | DOWN            | DOWN            |
| NOCHANGE        | NOCHANGE        | NOCHANGE        | NOCHANGE        | NOCHANGE        |
| NOCHANGE        | NOCHANGE        | NOCHANGE        | NOCHANGE        | NOCHANGE        |
| DOWN            | DOWN            | NOCHANGE        | DOWN            | DOWN            |
| NOCHANGE        | UP              | NOCHANGE        | NOCHANGE        | NOCHANGE        |
| UP              | NOCHANGE        | NOCHANGE        | NOCHANGE        | UP              |
| NOCHANGE        | NOCHANGE        | DOWN            | NOCHANGE        | NOCHANGE        |
| NOCHANGE        | UP              | NOCHANGE        | UP              | NOCHANGE        |
| NOCHANGE        | DOWN            | DOWN            | DOWN            | DOWN            |
| UP              | UP              | UP              | NOCHANGE        | NOCHANGE        |
| NOCHANGE        | NOCHANGE        | NOCHANGE        | NOCHANGE        | NOCHANGE        |
| NOCHANGE        | UP              | NOCHANGE        | NOCHANGE        | NOCHANGE        |
| DOWN            | NOCHANGE        | NOCHANGE        | NOCHANGE        | DOWN            |
| DOWN            | DOWN            | DOWN            | NOCHANGE        | DOWN            |
| DOWN            | UP              | DOWN            | NOCHANGE        | DOWN            |
| NOCHANGE        | NOCHANGE        | NOCHANGE        | NOCHANGE        | NOCHANGE        |
| NOCHANGE        | NOCHANGE        | NOCHANGE        | NOCHANGE        | NOCHANGE        |
| NOCHANGE        | DOWN            | DOWN            | NOCHANGE        | NOCHANGE        |
| NOCHANGE        | NOCHANGE        | NOCHANGE        | NOCHANGE        | NOCHANGE        |
| DOWN            | DOWN            | DOWN            | NOCHANGE        | DOWN            |

|                  |                  |                  |                  |                  |
|------------------|------------------|------------------|------------------|------------------|
| TCGA-BP-5184-01. | TCGA-CJ-4899-01/ | TCGA-CJ-4881-01/ | TCGA-CJ-4878-01/ | TCGA-B0-4819-01. |
| NOCHANGE         | NOCHANGE         | UP               | NOCHANGE         | NOCHANGE         |
| UP               | UP               | UP               | UP               | UP               |
| NOCHANGE         | NOCHANGE         | NOCHANGE         | NOCHANGE         | NOCHANGE         |
| DOWN             | DOWN             | DOWN             | DOWN             | DOWN             |
| NOCHANGE         | NOCHANGE         | NOCHANGE         | UP               | NOCHANGE         |
| NOCHANGE         | NOCHANGE         | NOCHANGE         | NOCHANGE         | NOCHANGE         |
| DOWN             | DOWN             | NOCHANGE         | NOCHANGE         | DOWN             |
| NOCHANGE         | DOWN             | NOCHANGE         | UP               | NOCHANGE         |
| DOWN             | NOCHANGE         | UP               | NOCHANGE         | NOCHANGE         |
| NOCHANGE         | NOCHANGE         | NOCHANGE         | NOCHANGE         | NOCHANGE         |
| NOCHANGE         | DOWN             | NOCHANGE         | DOWN             | NOCHANGE         |
| NOCHANGE         | UP               | UP               | UP               | NOCHANGE         |
| NOCHANGE         | NOCHANGE         | NOCHANGE         | NOCHANGE         | NOCHANGE         |
| NOCHANGE         | NOCHANGE         | NOCHANGE         | NOCHANGE         | NOCHANGE         |
| NOCHANGE         | NOCHANGE         | NOCHANGE         | DOWN             | NOCHANGE         |
| NOCHANGE         | UP               | NOCHANGE         | NOCHANGE         | NOCHANGE         |
| NOCHANGE         | UP               | NOCHANGE         | NOCHANGE         | NOCHANGE         |
| NOCHANGE         | DOWN             | NOCHANGE         | NOCHANGE         | DOWN             |
| NOCHANGE         | NOCHANGE         | UP               | UP               | NOCHANGE         |
| DOWN             | NOCHANGE         | NOCHANGE         | DOWN             | DOWN             |
| NOCHANGE         | NOCHANGE         | NOCHANGE         | NOCHANGE         | NOCHANGE         |
| UP               | NOCHANGE         | NOCHANGE         | NOCHANGE         | NOCHANGE         |
| NOCHANGE         | NOCHANGE         | NOCHANGE         | DOWN             | DOWN             |
| NOCHANGE         | DOWN             | DOWN             | DOWN             | DOWN             |
| NOCHANGE         | DOWN             | DOWN             | NOCHANGE         | DOWN             |
| NOCHANGE         | NOCHANGE         | NOCHANGE         | NOCHANGE         | DOWN             |
| NOCHANGE         | NOCHANGE         | NOCHANGE         | NOCHANGE         | UP               |
| NOCHANGE         | NOCHANGE         | NOCHANGE         | NOCHANGE         | NOCHANGE         |
| NOCHANGE         | NOCHANGE         | NOCHANGE         | NOCHANGE         | NOCHANGE         |
| NOCHANGE         | NOCHANGE         | NOCHANGE         | NOCHANGE         | NOCHANGE         |
| DOWN             | DOWN             | DOWN             | DOWN             | DOWN             |



| TCGA-B0-4710-01. | TCGA-A3-3331-01 | TCGA-BP-5174-01. | TCGA-B0-5694-01. | TCGA-B0-5116-01. |
|------------------|-----------------|------------------|------------------|------------------|
| NOCHANGE         | NOCHANGE        | UP               | NOCHANGE         | NOCHANGE         |
| UP               | UP              | UP               | UP               | UP               |
| NOCHANGE         | NOCHANGE        | NOCHANGE         | NOCHANGE         | NOCHANGE         |
| DOWN             | NOCHANGE        | DOWN             | DOWN             | DOWN             |
| NOCHANGE         | NOCHANGE        | UP               | NOCHANGE         | NOCHANGE         |
| NOCHANGE         | UP              | UP               | NOCHANGE         | NOCHANGE         |
| DOWN             | NOCHANGE        | DOWN             | DOWN             | DOWN             |
| DOWN             | DOWN            | DOWN             | NOCHANGE         | NOCHANGE         |
| DOWN             | DOWN            | NOCHANGE         | DOWN             | DOWN             |
| NOCHANGE         | NOCHANGE        | NOCHANGE         | NOCHANGE         | DOWN             |
| DOWN             | DOWN            | NOCHANGE         | NOCHANGE         | NOCHANGE         |
| DOWN             | NOCHANGE        | NOCHANGE         | NOCHANGE         | DOWN             |
| NOCHANGE         | NOCHANGE        | NOCHANGE         | NOCHANGE         | NOCHANGE         |
| NOCHANGE         | NOCHANGE        | NOCHANGE         | NOCHANGE         | NOCHANGE         |
| DOWN             | DOWN            | DOWN             | DOWN             | DOWN             |
| NOCHANGE         | NOCHANGE        | DOWN             | UP               | NOCHANGE         |
| NOCHANGE         | NOCHANGE        | NOCHANGE         | NOCHANGE         | NOCHANGE         |
| DOWN             | DOWN            | NOCHANGE         | NOCHANGE         | NOCHANGE         |
| UP               | UP              | NOCHANGE         | NOCHANGE         | UP               |
| DOWN             | NOCHANGE        | DOWN             | NOCHANGE         | NOCHANGE         |
| NOCHANGE         | UP              | NOCHANGE         | NOCHANGE         | NOCHANGE         |
| NOCHANGE         | UP              | NOCHANGE         | NOCHANGE         | UP               |
| NOCHANGE         | NOCHANGE        | DOWN             | NOCHANGE         | NOCHANGE         |
| DOWN             | DOWN            | NOCHANGE         | NOCHANGE         | DOWN             |
| NOCHANGE         | NOCHANGE        | NOCHANGE         | DOWN             | DOWN             |
| DOWN             | NOCHANGE        | NOCHANGE         | NOCHANGE         | NOCHANGE         |
| NOCHANGE         | NOCHANGE        | NOCHANGE         | NOCHANGE         | NOCHANGE         |
| UP               | NOCHANGE        | NOCHANGE         | NOCHANGE         | NOCHANGE         |
| NOCHANGE         | NOCHANGE        | DOWN             | DOWN             | NOCHANGE         |
| NOCHANGE         | UP              | NOCHANGE         | NOCHANGE         | NOCHANGE         |
| DOWN             | NOCHANGE        | NOCHANGE         | DOWN             | NOCHANGE         |

| TCGA-DV-5567-01 | TCGA-BP-5169-01 | TCGA-B0-4700-01 | TCGA-AK-3433-01 | TCGA-CJ-4875-01 |
|-----------------|-----------------|-----------------|-----------------|-----------------|
| DOWN            | NOCHANGE        | NOCHANGE        | DOWN            | NOCHANGE        |
| NOCHANGE        | UP              | UP              | NOCHANGE        | UP              |
| NOCHANGE        | NOCHANGE        | NOCHANGE        | NOCHANGE        | NOCHANGE        |
| DOWN            | DOWN            | DOWN            | DOWN            | DOWN            |
| DOWN            | NOCHANGE        | NOCHANGE        | DOWN            | NOCHANGE        |
| DOWN            | NOCHANGE        | NOCHANGE        | DOWN            | NOCHANGE        |
| DOWN            | DOWN            | DOWN            | NOCHANGE        | DOWN            |
| DOWN            | UP              | NOCHANGE        | DOWN            | DOWN            |
| NOCHANGE        | NOCHANGE        | NOCHANGE        | NOCHANGE        | DOWN            |
| NOCHANGE        | NOCHANGE        | NOCHANGE        | UP              | NOCHANGE        |
| NOCHANGE        | NOCHANGE        | NOCHANGE        | NOCHANGE        | UP              |
| NOCHANGE        | NOCHANGE        | NOCHANGE        | DOWN            | DOWN            |
| NOCHANGE        | NOCHANGE        | NOCHANGE        | DOWN            | NOCHANGE        |
| NOCHANGE        | DOWN            | NOCHANGE        | DOWN            | DOWN            |
| NOCHANGE        | DOWN            | NOCHANGE        | DOWN            | DOWN            |
| DOWN            | NOCHANGE        | NOCHANGE        | NOCHANGE        | NOCHANGE        |
| NOCHANGE        | DOWN            | NOCHANGE        | NOCHANGE        | NOCHANGE        |
| DOWN            | DOWN            | NOCHANGE        | DOWN            | DOWN            |
| UP              | NOCHANGE        | NOCHANGE        | NOCHANGE        | NOCHANGE        |
| DOWN            | NOCHANGE        | DOWN            | UP              | DOWN            |
| NOCHANGE        | NOCHANGE        | NOCHANGE        | NOCHANGE        | NOCHANGE        |
| NOCHANGE        | NOCHANGE        | NOCHANGE        | NOCHANGE        | NOCHANGE        |
| DOWN            | DOWN            | NOCHANGE        | DOWN            | DOWN            |
| NOCHANGE        | NOCHANGE        | NOCHANGE        | NOCHANGE        | DOWN            |
| DOWN            | DOWN            | DOWN            | NOCHANGE        | DOWN            |
| NOCHANGE        | NOCHANGE        | NOCHANGE        | NOCHANGE        | NOCHANGE        |
| NOCHANGE        | NOCHANGE        | NOCHANGE        | UP              | NOCHANGE        |
| NOCHANGE        | NOCHANGE        | NOCHANGE        | DOWN            | NOCHANGE        |
| NOCHANGE        | DOWN            | DOWN            | DOWN            | DOWN            |
| NOCHANGE        | NOCHANGE        | NOCHANGE        | DOWN            | DOWN            |
| DOWN            | DOWN            | NOCHANGE        | UP              | DOWN            |

| TCGA-A3-3335-01 | TCGA-B0-5115-01 | TCGA-BP-5195-01 | TCGA-BP-4354-01 | TCGA-BP-4974-01 |
|-----------------|-----------------|-----------------|-----------------|-----------------|
| NOCHANGE        | NOCHANGE        | NOCHANGE        | UP              | NOCHANGE        |
| UP              | UP              | UP              | NOCHANGE        | UP              |
| NOCHANGE        | NOCHANGE        | NOCHANGE        | NOCHANGE        | NOCHANGE        |
| DOWN            | DOWN            | DOWN            | DOWN            | DOWN            |
| UP              | NOCHANGE        | UP              | UP              | NOCHANGE        |
| UP              | NOCHANGE        | NOCHANGE        | DOWN            | NOCHANGE        |
| DOWN            | DOWN            | DOWN            | NOCHANGE        | NOCHANGE        |
| NOCHANGE        | DOWN            | NOCHANGE        | NOCHANGE        | NOCHANGE        |
| NOCHANGE        | DOWN            | NOCHANGE        | NOCHANGE        | NOCHANGE        |
| NOCHANGE        | NOCHANGE        | DOWN            | NOCHANGE        | NOCHANGE        |
| DOWN            | NOCHANGE        | NOCHANGE        | NOCHANGE        | NOCHANGE        |
| NOCHANGE        | NOCHANGE        | NOCHANGE        | NOCHANGE        | UP              |
| NOCHANGE        | NOCHANGE        | NOCHANGE        | DOWN            | NOCHANGE        |
| DOWN            | NOCHANGE        | NOCHANGE        | UP              | NOCHANGE        |
| DOWN            | DOWN            | DOWN            | DOWN            | NOCHANGE        |
| NOCHANGE        | NOCHANGE        | NOCHANGE        | NOCHANGE        | NOCHANGE        |
| NOCHANGE        | NOCHANGE        | NOCHANGE        | UP              | NOCHANGE        |
| NOCHANGE        | DOWN            | DOWN            | DOWN            | DOWN            |
| NOCHANGE        | UP              | NOCHANGE        | UP              | NOCHANGE        |
| NOCHANGE        | NOCHANGE        | NOCHANGE        | DOWN            | DOWN            |
| NOCHANGE        | NOCHANGE        | UP              | UP              | NOCHANGE        |
| UP              | NOCHANGE        | UP              | NOCHANGE        | NOCHANGE        |
| NOCHANGE        | NOCHANGE        | NOCHANGE        | UP              | DOWN            |
| NOCHANGE        | DOWN            | DOWN            | DOWN            | DOWN            |
| NOCHANGE        | DOWN            | DOWN            | DOWN            | DOWN            |
| NOCHANGE        | DOWN            | NOCHANGE        | NOCHANGE        | NOCHANGE        |
| NOCHANGE        | NOCHANGE        | NOCHANGE        | NOCHANGE        | NOCHANGE        |
| NOCHANGE        | NOCHANGE        | NOCHANGE        | NOCHANGE        | NOCHANGE        |
| NOCHANGE        | NOCHANGE        | NOCHANGE        | NOCHANGE        | NOCHANGE        |
| NOCHANGE        | NOCHANGE        | NOCHANGE        | NOCHANGE        | NOCHANGE        |
| NOCHANGE        | NOCHANGE        | NOCHANGE        | NOCHANGE        | NOCHANGE        |
| NOCHANGE        | DOWN            | DOWN            | DOWN            | DOWN            |

|                 |                 |                 |                 |                 |
|-----------------|-----------------|-----------------|-----------------|-----------------|
| TCGA-CJ-4641-01 | TCGA-B4-5834-01 | TCGA-BP-4169-01 | TCGA-B2-5633-01 | TCGA-BP-4777-01 |
| NOCHANGE        | NOCHANGE        | NOCHANGE        | NOCHANGE        | NOCHANGE        |
| UP              | NOCHANGE        | UP              | UP              | UP              |
| NOCHANGE        | NOCHANGE        | NOCHANGE        | NOCHANGE        | NOCHANGE        |
| DOWN            | DOWN            | DOWN            | UP              | DOWN            |
| UP              | NOCHANGE        | UP              | UP              | NOCHANGE        |
| NOCHANGE        | NOCHANGE        | NOCHANGE        | NOCHANGE        | NOCHANGE        |
| NOCHANGE        | NOCHANGE        | DOWN            | DOWN            | DOWN            |
| NOCHANGE        | NOCHANGE        | NOCHANGE        | NOCHANGE        | NOCHANGE        |
| UP              | DOWN            | NOCHANGE        | NOCHANGE        | NOCHANGE        |
| NOCHANGE        | DOWN            | DOWN            | NOCHANGE        | NOCHANGE        |
| NOCHANGE        | NOCHANGE        | NOCHANGE        | NOCHANGE        | NOCHANGE        |
| NOCHANGE        | DOWN            | NOCHANGE        | NOCHANGE        | DOWN            |
| NOCHANGE        | NOCHANGE        | NOCHANGE        | NOCHANGE        | NOCHANGE        |
| NOCHANGE        | NOCHANGE        | NOCHANGE        | UP              | NOCHANGE        |
| DOWN            | DOWN            | NOCHANGE        | DOWN            | DOWN            |
| NOCHANGE        | NOCHANGE        | NOCHANGE        | UP              | UP              |
| UP              | NOCHANGE        | NOCHANGE        | NOCHANGE        | NOCHANGE        |
| NOCHANGE        | DOWN            | DOWN            | DOWN            | DOWN            |
| NOCHANGE        | NOCHANGE        | NOCHANGE        | UP              | NOCHANGE        |
| DOWN            | DOWN            | DOWN            | DOWN            | NOCHANGE        |
| UP              | NOCHANGE        | UP              | UP              | UP              |
| NOCHANGE        | UP              | UP              | NOCHANGE        | NOCHANGE        |
| NOCHANGE        | DOWN            | NOCHANGE        | NOCHANGE        | NOCHANGE        |
| NOCHANGE        | DOWN            | DOWN            | DOWN            | NOCHANGE        |
| DOWN            | NOCHANGE        | DOWN            | DOWN            | DOWN            |
| NOCHANGE        | NOCHANGE        | NOCHANGE        | DOWN            | NOCHANGE        |
| NOCHANGE        | NOCHANGE        | NOCHANGE        | NOCHANGE        | NOCHANGE        |
| NOCHANGE        | NOCHANGE        | UP              | DOWN            | NOCHANGE        |
| NOCHANGE        | DOWN            | NOCHANGE        | NOCHANGE        | NOCHANGE        |
| NOCHANGE        | NOCHANGE        | NOCHANGE        | NOCHANGE        | NOCHANGE        |
| NOCHANGE        | DOWN            | DOWN            | DOWN            | DOWN            |

| TCGA-B0-5399-01. | TCGA-B0-5099-01. | TCGA-BP-4166-01. | TCGA-CJ-4890-01. | TCGA-B0-5084-01. |
|------------------|------------------|------------------|------------------|------------------|
| NOCHANGE         | NOCHANGE         | NOCHANGE         | NOCHANGE         | NOCHANGE         |
| UP               | UP               | UP               | UP               | NOCHANGE         |
| NOCHANGE         | NOCHANGE         | NOCHANGE         | NOCHANGE         | DOWN             |
| DOWN             | DOWN             | NOCHANGE         | DOWN             | DOWN             |
| NOCHANGE         | NOCHANGE         | NOCHANGE         | UP               | NOCHANGE         |
| NOCHANGE         | NOCHANGE         | NOCHANGE         | NOCHANGE         | DOWN             |
| NOCHANGE         | NOCHANGE         | DOWN             | NOCHANGE         | NOCHANGE         |
| DOWN             | NOCHANGE         | NOCHANGE         | NOCHANGE         | NOCHANGE         |
| NOCHANGE         | NOCHANGE         | NOCHANGE         | UP               | NOCHANGE         |
| NOCHANGE         | NOCHANGE         | DOWN             | NOCHANGE         | NOCHANGE         |
| NOCHANGE         | NOCHANGE         | DOWN             | DOWN             | NOCHANGE         |
| NOCHANGE         | NOCHANGE         | DOWN             | NOCHANGE         | NOCHANGE         |
| NOCHANGE         | NOCHANGE         | NOCHANGE         | NOCHANGE         | NOCHANGE         |
| NOCHANGE         | NOCHANGE         | NOCHANGE         | NOCHANGE         | DOWN             |
| DOWN             | DOWN             | DOWN             | NOCHANGE         | DOWN             |
| NOCHANGE         | NOCHANGE         | NOCHANGE         | NOCHANGE         | DOWN             |
| UP               | NOCHANGE         | NOCHANGE         | NOCHANGE         | DOWN             |
| NOCHANGE         | NOCHANGE         | NOCHANGE         | DOWN             | DOWN             |
| UP               | NOCHANGE         | NOCHANGE         | NOCHANGE         | NOCHANGE         |
| NOCHANGE         | DOWN             | DOWN             | NOCHANGE         | DOWN             |
| NOCHANGE         | NOCHANGE         | NOCHANGE         | UP               | NOCHANGE         |
| NOCHANGE         | NOCHANGE         | UP               | NOCHANGE         | UP               |
| NOCHANGE         | DOWN             | DOWN             | UP               | UP               |
| NOCHANGE         | NOCHANGE         | NOCHANGE         | DOWN             | NOCHANGE         |
| NOCHANGE         | NOCHANGE         | DOWN             | DOWN             | DOWN             |
| NOCHANGE         | NOCHANGE         | NOCHANGE         | NOCHANGE         | UP               |
| NOCHANGE         | NOCHANGE         | NOCHANGE         | NOCHANGE         | NOCHANGE         |
| NOCHANGE         | NOCHANGE         | NOCHANGE         | NOCHANGE         | NOCHANGE         |
| NOCHANGE         | NOCHANGE         | NOCHANGE         | NOCHANGE         | NOCHANGE         |
| NOCHANGE         | NOCHANGE         | NOCHANGE         | NOCHANGE         | NOCHANGE         |
| NOCHANGE         | NOCHANGE         | NOCHANGE         | NOCHANGE         | NOCHANGE         |
| NOCHANGE         | NOCHANGE         | NOCHANGE         | NOCHANGE         | NOCHANGE         |
| NOCHANGE         | NOCHANGE         | NOCHANGE         | NOCHANGE         | DOWN             |
| NOCHANGE         | DOWN             | DOWN             | DOWN             | NOCHANGE         |

|                  |                  |                  |                  |                  |
|------------------|------------------|------------------|------------------|------------------|
| TCGA-BP-5168-01. | TCGA-BP-4770-01. | TCGA-BP-4332-01. | TCGA-B4-5832-01. | TCGA-B0-4849-01. |
| NOCHANGE         | NOCHANGE         | NOCHANGE         | UP               | NOCHANGE         |
| UP               | UP               | UP               | NOCHANGE         | UP               |
| NOCHANGE         | NOCHANGE         | NOCHANGE         | NOCHANGE         | NOCHANGE         |
| DOWN             | DOWN             | NOCHANGE         | DOWN             | DOWN             |
| NOCHANGE         | DOWN             | NOCHANGE         | UP               | NOCHANGE         |
| NOCHANGE         | DOWN             | NOCHANGE         | NOCHANGE         | NOCHANGE         |
| NOCHANGE         | NOCHANGE         | DOWN             | DOWN             | NOCHANGE         |
| DOWN             | NOCHANGE         | NOCHANGE         | NOCHANGE         | NOCHANGE         |
| NOCHANGE         | NOCHANGE         | NOCHANGE         | NOCHANGE         | NOCHANGE         |
| NOCHANGE         | NOCHANGE         | NOCHANGE         | NOCHANGE         | NOCHANGE         |
| NOCHANGE         | NOCHANGE         | NOCHANGE         | DOWN             | NOCHANGE         |
| NOCHANGE         | NOCHANGE         | NOCHANGE         | UP               | NOCHANGE         |
| NOCHANGE         | NOCHANGE         | NOCHANGE         | NOCHANGE         | NOCHANGE         |
| NOCHANGE         | DOWN             | NOCHANGE         | NOCHANGE         | NOCHANGE         |
| NOCHANGE         | NOCHANGE         | NOCHANGE         | NOCHANGE         | NOCHANGE         |
| DOWN             | DOWN             | DOWN             | DOWN             | DOWN             |
| UP               | DOWN             | NOCHANGE         | UP               | NOCHANGE         |
| NOCHANGE         | DOWN             | NOCHANGE         | DOWN             | NOCHANGE         |
| NOCHANGE         | DOWN             | DOWN             | DOWN             | NOCHANGE         |
| NOCHANGE         | DOWN             | NOCHANGE         | UP               | NOCHANGE         |
| DOWN             | DOWN             | DOWN             | UP               | NOCHANGE         |
| NOCHANGE         | NOCHANGE         | NOCHANGE         | UP               | NOCHANGE         |
| NOCHANGE         | NOCHANGE         | NOCHANGE         | NOCHANGE         | NOCHANGE         |
| NOCHANGE         | NOCHANGE         | NOCHANGE         | NOCHANGE         | NOCHANGE         |
| NOCHANGE         | NOCHANGE         | NOCHANGE         | NOCHANGE         | DOWN             |
| NOCHANGE         | NOCHANGE         | NOCHANGE         | DOWN             | DOWN             |
| NOCHANGE         | DOWN             | DOWN             | NOCHANGE         | DOWN             |
| NOCHANGE         | DOWN             | NOCHANGE         | NOCHANGE         | DOWN             |
| NOCHANGE         | NOCHANGE         | NOCHANGE         | NOCHANGE         | UP               |
| NOCHANGE         | NOCHANGE         | NOCHANGE         | NOCHANGE         | NOCHANGE         |
| NOCHANGE         | NOCHANGE         | NOCHANGE         | DOWN             | NOCHANGE         |
| NOCHANGE         | DOWN             | NOCHANGE         | NOCHANGE         | NOCHANGE         |
| NOCHANGE         | NOCHANGE         | NOCHANGE         | NOCHANGE         | NOCHANGE         |
| DOWN             | DOWN             | DOWN             | NOCHANGE         | DOWN             |

| TCGA-B8-5164-01 | TCGA-CW-6093-01 | TCGA-MM-A84U-( | TCGA-CJ-4637-01 | TCGA-CJ-4642-01 |
|-----------------|-----------------|----------------|-----------------|-----------------|
| NOCHANGE        | NOCHANGE        | NOCHANGE       | NOCHANGE        | NOCHANGE        |
| UP              | UP              | UP             | UP              | NOCHANGE        |
| NOCHANGE        | NOCHANGE        | NOCHANGE       | NOCHANGE        | NOCHANGE        |
| DOWN            | DOWN            | DOWN           | DOWN            | DOWN            |
| UP              | NOCHANGE        | NOCHANGE       | NOCHANGE        | DOWN            |
| NOCHANGE        | NOCHANGE        | NOCHANGE       | NOCHANGE        | NOCHANGE        |
| DOWN            | DOWN            | DOWN           | DOWN            | NOCHANGE        |
| DOWN            | NOCHANGE        | NOCHANGE       | DOWN            | NOCHANGE        |
| NOCHANGE        | UP              | NOCHANGE       | NOCHANGE        | UP              |
| NOCHANGE        | NOCHANGE        | NOCHANGE       | NOCHANGE        | UP              |
| NOCHANGE        | NOCHANGE        | NOCHANGE       | NOCHANGE        | UP              |
| NOCHANGE        | NOCHANGE        | NOCHANGE       | UP              | UP              |
| NOCHANGE        | NOCHANGE        | NOCHANGE       | NOCHANGE        | NOCHANGE        |
| NOCHANGE        | NOCHANGE        | NOCHANGE       | NOCHANGE        | DOWN            |
| DOWN            | DOWN            | NOCHANGE       | DOWN            | NOCHANGE        |
| NOCHANGE        | NOCHANGE        | DOWN           | NOCHANGE        | NOCHANGE        |
| UP              | UP              | NOCHANGE       | UP              | DOWN            |
| DOWN            | DOWN            | NOCHANGE       | DOWN            | NOCHANGE        |
| NOCHANGE        | NOCHANGE        | NOCHANGE       | NOCHANGE        | NOCHANGE        |
| NOCHANGE        | DOWN            | DOWN           | DOWN            | DOWN            |
| UP              | NOCHANGE        | NOCHANGE       | UP              | NOCHANGE        |
| UP              | NOCHANGE        | NOCHANGE       | UP              | NOCHANGE        |
| NOCHANGE        | NOCHANGE        | DOWN           | NOCHANGE        | DOWN            |
| DOWN            | DOWN            | NOCHANGE       | DOWN            | NOCHANGE        |
| NOCHANGE        | DOWN            | DOWN           | DOWN            | DOWN            |
| DOWN            | NOCHANGE        | NOCHANGE       | NOCHANGE        | NOCHANGE        |
| NOCHANGE        | NOCHANGE        | NOCHANGE       | NOCHANGE        | UP              |
| NOCHANGE        | NOCHANGE        | NOCHANGE       | NOCHANGE        | NOCHANGE        |
| NOCHANGE        | NOCHANGE        | DOWN           | NOCHANGE        | DOWN            |
| NOCHANGE        | NOCHANGE        | NOCHANGE       | NOCHANGE        | NOCHANGE        |
| DOWN            | DOWN            | NOCHANGE       | DOWN            | DOWN            |

| TCGA-BP-5178-01. | TCGA-BP-4790-01. | TCGA-B0-5692-01. | TCGA-CJ-4885-01. | TCGA-BP-4768-01. |
|------------------|------------------|------------------|------------------|------------------|
| UP               | NOCHANGE         | NOCHANGE         | NOCHANGE         | NOCHANGE         |
| UP               | UP               | UP               | UP               | UP               |
| NOCHANGE         | NOCHANGE         | NOCHANGE         | NOCHANGE         | NOCHANGE         |
| DOWN             | NOCHANGE         | DOWN             | DOWN             | DOWN             |
| UP               | NOCHANGE         | NOCHANGE         | UP               | NOCHANGE         |
| UP               | NOCHANGE         | NOCHANGE         | NOCHANGE         | NOCHANGE         |
| NOCHANGE         | NOCHANGE         | DOWN             | DOWN             | DOWN             |
| UP               | DOWN             | DOWN             | NOCHANGE         | NOCHANGE         |
| NOCHANGE         | NOCHANGE         | DOWN             | DOWN             | NOCHANGE         |
| NOCHANGE         | DOWN             | NOCHANGE         | NOCHANGE         | NOCHANGE         |
| NOCHANGE         | NOCHANGE         | NOCHANGE         | DOWN             | DOWN             |
| NOCHANGE         | NOCHANGE         | DOWN             | DOWN             | UP               |
| NOCHANGE         | NOCHANGE         | NOCHANGE         | NOCHANGE         | NOCHANGE         |
| DOWN             | NOCHANGE         | NOCHANGE         | NOCHANGE         | NOCHANGE         |
| DOWN             | NOCHANGE         | DOWN             | DOWN             | DOWN             |
| NOCHANGE         | NOCHANGE         | NOCHANGE         | UP               | NOCHANGE         |
| NOCHANGE         | NOCHANGE         | NOCHANGE         | NOCHANGE         | NOCHANGE         |
| NOCHANGE         | DOWN             | NOCHANGE         | NOCHANGE         | NOCHANGE         |
| NOCHANGE         | UP               | NOCHANGE         | NOCHANGE         | UP               |
| UP               | DOWN             | DOWN             | NOCHANGE         | UP               |
| NOCHANGE         | UP               | NOCHANGE         | NOCHANGE         | NOCHANGE         |
| NOCHANGE         | UP               | UP               | UP               | UP               |
| UP               | NOCHANGE         | NOCHANGE         | NOCHANGE         | NOCHANGE         |
| NOCHANGE         | DOWN             | NOCHANGE         | DOWN             | DOWN             |
| DOWN             | DOWN             | NOCHANGE         | NOCHANGE         | DOWN             |
| UP               | DOWN             | NOCHANGE         | NOCHANGE         | DOWN             |
| NOCHANGE         | NOCHANGE         | NOCHANGE         | NOCHANGE         | NOCHANGE         |
| NOCHANGE         | NOCHANGE         | NOCHANGE         | NOCHANGE         | NOCHANGE         |
| DOWN             | NOCHANGE         | NOCHANGE         | NOCHANGE         | NOCHANGE         |
| NOCHANGE         | NOCHANGE         | NOCHANGE         | NOCHANGE         | NOCHANGE         |
| UP               | DOWN             | NOCHANGE         | DOWN             | DOWN             |



| TCGA-B0-5713-01 | TCGA-CW-5587-01 | TCGA-BP-5201-01 | TCGA-CW-5590-01 | TCGA-A3-3370-01 |
|-----------------|-----------------|-----------------|-----------------|-----------------|
| NOCHANGE        | NOCHANGE        | NOCHANGE        | NOCHANGE        | NOCHANGE        |
| UP              | UP              | UP              | UP              | UP              |
| NOCHANGE        | NOCHANGE        | NOCHANGE        | NOCHANGE        | NOCHANGE        |
| DOWN            | NOCHANGE        | DOWN            | DOWN            | NOCHANGE        |
| NOCHANGE        | NOCHANGE        | NOCHANGE        | NOCHANGE        | NOCHANGE        |
| NOCHANGE        | NOCHANGE        | NOCHANGE        | NOCHANGE        | NOCHANGE        |
| DOWN            | DOWN            | NOCHANGE        | NOCHANGE        | DOWN            |
| DOWN            | DOWN            | NOCHANGE        | NOCHANGE        | NOCHANGE        |
| DOWN            | NOCHANGE        | NOCHANGE        | NOCHANGE        | NOCHANGE        |
| NOCHANGE        | NOCHANGE        | NOCHANGE        | NOCHANGE        | NOCHANGE        |
| NOCHANGE        | DOWN            | NOCHANGE        | NOCHANGE        | NOCHANGE        |
| NOCHANGE        | NOCHANGE        | UP              | NOCHANGE        | NOCHANGE        |
| NOCHANGE        | NOCHANGE        | NOCHANGE        | NOCHANGE        | NOCHANGE        |
| NOCHANGE        | NOCHANGE        | DOWN            | NOCHANGE        | NOCHANGE        |
| DOWN            | DOWN            | NOCHANGE        | DOWN            | DOWN            |
| NOCHANGE        | NOCHANGE        | NOCHANGE        | NOCHANGE        | UP              |
| UP              | NOCHANGE        | NOCHANGE        | NOCHANGE        | NOCHANGE        |
| NOCHANGE        | NOCHANGE        | NOCHANGE        | DOWN            | DOWN            |
| UP              | NOCHANGE        | NOCHANGE        | NOCHANGE        | NOCHANGE        |
| DOWN            | NOCHANGE        | NOCHANGE        | NOCHANGE        | DOWN            |
| NOCHANGE        | UP              | NOCHANGE        | NOCHANGE        | UP              |
| UP              | NOCHANGE        | UP              | UP              | NOCHANGE        |
| NOCHANGE        | NOCHANGE        | DOWN            | NOCHANGE        | DOWN            |
| NOCHANGE        | NOCHANGE        | DOWN            | NOCHANGE        | DOWN            |
| NOCHANGE        | NOCHANGE        | DOWN            | DOWN            | NOCHANGE        |
| NOCHANGE        | DOWN            | NOCHANGE        | NOCHANGE        | DOWN            |
| NOCHANGE        | NOCHANGE        | NOCHANGE        | NOCHANGE        | UP              |
| NOCHANGE        | NOCHANGE        | NOCHANGE        | NOCHANGE        | NOCHANGE        |
| NOCHANGE        | NOCHANGE        | NOCHANGE        | NOCHANGE        | DOWN            |
| NOCHANGE        | NOCHANGE        | NOCHANGE        | NOCHANGE        | NOCHANGE        |
| DOWN            | NOCHANGE        | DOWN            | DOWN            | DOWN            |

| TCGA-B0-4848-01 | TCGA-B0-4698-01 | TCGA-BP-4982-01 | TCGA-CJ-4636-01 | TCGA-AK-3455-01 |
|-----------------|-----------------|-----------------|-----------------|-----------------|
| NOCHANGE        | NOCHANGE        | NOCHANGE        | NOCHANGE        | NOCHANGE        |
| UP              | NOCHANGE        | UP              | UP              | UP              |
| NOCHANGE        | NOCHANGE        | NOCHANGE        | NOCHANGE        | NOCHANGE        |
| DOWN            | DOWN            | NOCHANGE        | DOWN            | DOWN            |
| UP              | DOWN            | NOCHANGE        | NOCHANGE        | UP              |
| UP              | DOWN            | NOCHANGE        | NOCHANGE        | NOCHANGE        |
| NOCHANGE        | NOCHANGE        | DOWN            | NOCHANGE        | NOCHANGE        |
| NOCHANGE        | NOCHANGE        | NOCHANGE        | NOCHANGE        | NOCHANGE        |
| NOCHANGE        | UP              | NOCHANGE        | UP              | UP              |
| DOWN            | NOCHANGE        | NOCHANGE        | NOCHANGE        | NOCHANGE        |
| NOCHANGE        | NOCHANGE        | DOWN            | NOCHANGE        | UP              |
| DOWN            | NOCHANGE        | DOWN            | NOCHANGE        | DOWN            |
| NOCHANGE        | DOWN            | NOCHANGE        | NOCHANGE        | NOCHANGE        |
| NOCHANGE        | NOCHANGE        | NOCHANGE        | NOCHANGE        | NOCHANGE        |
| NOCHANGE        | DOWN            | DOWN            | NOCHANGE        | DOWN            |
| NOCHANGE        | DOWN            | NOCHANGE        | NOCHANGE        | NOCHANGE        |
| NOCHANGE        | NOCHANGE        | NOCHANGE        | NOCHANGE        | NOCHANGE        |
| DOWN            | DOWN            | DOWN            | DOWN            | NOCHANGE        |
| NOCHANGE        | NOCHANGE        | UP              | NOCHANGE        | NOCHANGE        |
| NOCHANGE        | DOWN            | DOWN            | DOWN            | NOCHANGE        |
| UP              | UP              | UP              | UP              | NOCHANGE        |
| UP              | UP              | UP              | NOCHANGE        | NOCHANGE        |
| NOCHANGE        | UP              | NOCHANGE        | NOCHANGE        | DOWN            |
| NOCHANGE        | DOWN            | DOWN            | DOWN            | NOCHANGE        |
| DOWN            | DOWN            | DOWN            | DOWN            | NOCHANGE        |
| NOCHANGE        | UP              | NOCHANGE        | NOCHANGE        | DOWN            |
| NOCHANGE        | NOCHANGE        | NOCHANGE        | NOCHANGE        | NOCHANGE        |
| NOCHANGE        | NOCHANGE        | NOCHANGE        | NOCHANGE        | NOCHANGE        |
| NOCHANGE        | DOWN            | NOCHANGE        | NOCHANGE        | DOWN            |
| DOWN            | NOCHANGE        | NOCHANGE        | NOCHANGE        | NOCHANGE        |
| NOCHANGE        | DOWN            | DOWN            | DOWN            | NOCHANGE        |

| TCGA-A3-A6NN-0 | TCGA-G6-A8L6-01 | TCGA-B0-5703-01 | TCGA-BP-4176-01 | TCGA-B0-4707-01 |
|----------------|-----------------|-----------------|-----------------|-----------------|
| NOCHANGE       | NOCHANGE        | NOCHANGE        | NOCHANGE        | UP              |
| UP             | UP              | UP              | UP              | UP              |
| NOCHANGE       | NOCHANGE        | NOCHANGE        | NOCHANGE        | NOCHANGE        |
| DOWN           | DOWN            | DOWN            | DOWN            | DOWN            |
| NOCHANGE       | NOCHANGE        | NOCHANGE        | UP              | NOCHANGE        |
| NOCHANGE       | NOCHANGE        | NOCHANGE        | NOCHANGE        | NOCHANGE        |
| NOCHANGE       | DOWN            | DOWN            | DOWN            | DOWN            |
| NOCHANGE       | NOCHANGE        | NOCHANGE        | NOCHANGE        | NOCHANGE        |
| NOCHANGE       | DOWN            | DOWN            | UP              | UP              |
| NOCHANGE       | NOCHANGE        | NOCHANGE        | NOCHANGE        | NOCHANGE        |
| NOCHANGE       | NOCHANGE        | NOCHANGE        | NOCHANGE        | NOCHANGE        |
| NOCHANGE       | DOWN            | DOWN            | DOWN            | UP              |
| NOCHANGE       | NOCHANGE        | NOCHANGE        | NOCHANGE        | NOCHANGE        |
| NOCHANGE       | DOWN            | NOCHANGE        | NOCHANGE        | NOCHANGE        |
| DOWN           | DOWN            | NOCHANGE        | DOWN            | DOWN            |
| NOCHANGE       | NOCHANGE        | NOCHANGE        | NOCHANGE        | NOCHANGE        |
| NOCHANGE       | NOCHANGE        | NOCHANGE        | NOCHANGE        | DOWN            |
| DOWN           | NOCHANGE        | NOCHANGE        | NOCHANGE        | NOCHANGE        |
| NOCHANGE       | NOCHANGE        | NOCHANGE        | NOCHANGE        | NOCHANGE        |
| NOCHANGE       | DOWN            | NOCHANGE        | NOCHANGE        | UP              |
| NOCHANGE       | NOCHANGE        | NOCHANGE        | UP              | NOCHANGE        |
| UP             | NOCHANGE        | UP              | NOCHANGE        | NOCHANGE        |
| NOCHANGE       | DOWN            | DOWN            | UP              | UP              |
| DOWN           | NOCHANGE        | NOCHANGE        | NOCHANGE        | DOWN            |
| NOCHANGE       | DOWN            | NOCHANGE        | DOWN            | DOWN            |
| NOCHANGE       | NOCHANGE        | DOWN            | NOCHANGE        | UP              |
| NOCHANGE       | NOCHANGE        | NOCHANGE        | NOCHANGE        | NOCHANGE        |
| NOCHANGE       | NOCHANGE        | NOCHANGE        | NOCHANGE        | NOCHANGE        |
| NOCHANGE       | NOCHANGE        | NOCHANGE        | NOCHANGE        | NOCHANGE        |
| NOCHANGE       | DOWN            | NOCHANGE        | NOCHANGE        | DOWN            |
| NOCHANGE       | NOCHANGE        | NOCHANGE        | NOCHANGE        | DOWN            |
| DOWN           | DOWN            | NOCHANGE        | DOWN            | DOWN            |

| TCGA-CW-5591-01 | TCGA-B4-5838-01 | TCGA-BP-4775-01 | TCGA-BP-4158-01 | TCGA-CJ-5676-01 |
|-----------------|-----------------|-----------------|-----------------|-----------------|
| NOCHANGE        | NOCHANGE        | NOCHANGE        | NOCHANGE        | NOCHANGE        |
| NOCHANGE        | UP              | UP              | UP              | UP              |
| NOCHANGE        | NOCHANGE        | NOCHANGE        | NOCHANGE        | NOCHANGE        |
| NOCHANGE        | DOWN            | NOCHANGE        | DOWN            | DOWN            |
| UP              | UP              | NOCHANGE        | NOCHANGE        | UP              |
| UP              | UP              | NOCHANGE        | NOCHANGE        | NOCHANGE        |
| DOWN            | NOCHANGE        | DOWN            | DOWN            | DOWN            |
| NOCHANGE        | NOCHANGE        | NOCHANGE        | NOCHANGE        | NOCHANGE        |
| NOCHANGE        | NOCHANGE        | NOCHANGE        | NOCHANGE        | DOWN            |
| NOCHANGE        | DOWN            | NOCHANGE        | NOCHANGE        | NOCHANGE        |
| DOWN            | NOCHANGE        | NOCHANGE        | NOCHANGE        | NOCHANGE        |
| NOCHANGE        | DOWN            | NOCHANGE        | UP              | NOCHANGE        |
| NOCHANGE        | NOCHANGE        | NOCHANGE        | NOCHANGE        | NOCHANGE        |
| UP              | UP              | NOCHANGE        | NOCHANGE        | DOWN            |
| NOCHANGE        | DOWN            | DOWN            | DOWN            | DOWN            |
| NOCHANGE        | NOCHANGE        | NOCHANGE        | NOCHANGE        | NOCHANGE        |
| UP              | NOCHANGE        | NOCHANGE        | NOCHANGE        | NOCHANGE        |
| NOCHANGE        | DOWN            | DOWN            | NOCHANGE        | NOCHANGE        |
| NOCHANGE        | NOCHANGE        | NOCHANGE        | NOCHANGE        | NOCHANGE        |
| NOCHANGE        | NOCHANGE        | NOCHANGE        | NOCHANGE        | NOCHANGE        |
| NOCHANGE        | NOCHANGE        | NOCHANGE        | DOWN            | UP              |
| NOCHANGE        | NOCHANGE        | UP              | NOCHANGE        | NOCHANGE        |
| UP              | NOCHANGE        | NOCHANGE        | NOCHANGE        | NOCHANGE        |
| UP              | NOCHANGE        | DOWN            | NOCHANGE        | DOWN            |
| DOWN            | NOCHANGE        | DOWN            | NOCHANGE        | NOCHANGE        |
| NOCHANGE        | NOCHANGE        | DOWN            | DOWN            | DOWN            |
| NOCHANGE        | NOCHANGE        | DOWN            | NOCHANGE        | NOCHANGE        |
| NOCHANGE        | NOCHANGE        | DOWN            | NOCHANGE        | NOCHANGE        |
| NOCHANGE        | NOCHANGE        | NOCHANGE        | NOCHANGE        | NOCHANGE        |
| NOCHANGE        | DOWN            | NOCHANGE        | NOCHANGE        | NOCHANGE        |
| NOCHANGE        | NOCHANGE        | NOCHANGE        | DOWN            | NOCHANGE        |
| NOCHANGE        | DOWN            | NOCHANGE        | NOCHANGE        | NOCHANGE        |
| NOCHANGE        | UP              | DOWN            | DOWN            | NOCHANGE        |

| TCGA-DV-5565-01 | TCGA-BP-4163-01 | TCGA-BP-4327-01 | TCGA-BP-5182-01 | TCGA-CJ-4884-01 |
|-----------------|-----------------|-----------------|-----------------|-----------------|
| NOCHANGE        | UP              | NOCHANGE        | NOCHANGE        | NOCHANGE        |
| UP              | UP              | UP              | UP              | UP              |
| NOCHANGE        | NOCHANGE        | NOCHANGE        | NOCHANGE        | NOCHANGE        |
| DOWN            | NOCHANGE        | DOWN            | DOWN            | DOWN            |
| NOCHANGE        | UP              | NOCHANGE        | NOCHANGE        | UP              |
| NOCHANGE        | UP              | NOCHANGE        | NOCHANGE        | NOCHANGE        |
| NOCHANGE        | DOWN            | DOWN            | NOCHANGE        | DOWN            |
| NOCHANGE        | NOCHANGE        | NOCHANGE        | NOCHANGE        | NOCHANGE        |
| DOWN            | NOCHANGE        | NOCHANGE        | NOCHANGE        | NOCHANGE        |
| NOCHANGE        | NOCHANGE        | NOCHANGE        | NOCHANGE        | NOCHANGE        |
| NOCHANGE        | DOWN            | NOCHANGE        | NOCHANGE        | NOCHANGE        |
| DOWN            | NOCHANGE        | NOCHANGE        | NOCHANGE        | DOWN            |
| NOCHANGE        | NOCHANGE        | NOCHANGE        | NOCHANGE        | NOCHANGE        |
| DOWN            | NOCHANGE        | DOWN            | NOCHANGE        | NOCHANGE        |
| NOCHANGE        | DOWN            | DOWN            | NOCHANGE        | DOWN            |
| NOCHANGE        | NOCHANGE        | NOCHANGE        | NOCHANGE        | NOCHANGE        |
| NOCHANGE        | UP              | NOCHANGE        | NOCHANGE        | NOCHANGE        |
| NOCHANGE        | DOWN            | DOWN            | DOWN            | DOWN            |
| NOCHANGE        | UP              | NOCHANGE        | NOCHANGE        | NOCHANGE        |
| DOWN            | NOCHANGE        | DOWN            | DOWN            | DOWN            |
| NOCHANGE        | UP              | NOCHANGE        | UP              | UP              |
| NOCHANGE        | NOCHANGE        | UP              | NOCHANGE        | NOCHANGE        |
| NOCHANGE        | NOCHANGE        | DOWN            | NOCHANGE        | NOCHANGE        |
| DOWN            | NOCHANGE        | NOCHANGE        | DOWN            | DOWN            |
| DOWN            | NOCHANGE        | DOWN            | DOWN            | DOWN            |
| NOCHANGE        | NOCHANGE        | NOCHANGE        | NOCHANGE        | NOCHANGE        |
| NOCHANGE        | NOCHANGE        | NOCHANGE        | NOCHANGE        | NOCHANGE        |
| NOCHANGE        | NOCHANGE        | NOCHANGE        | NOCHANGE        | NOCHANGE        |
| NOCHANGE        | NOCHANGE        | NOCHANGE        | NOCHANGE        | NOCHANGE        |
| NOCHANGE        | NOCHANGE        | DOWN            | NOCHANGE        | DOWN            |
| DOWN            | DOWN            | NOCHANGE        | NOCHANGE        | NOCHANGE        |
| DOWN            | NOCHANGE        | DOWN            | DOWN            | DOWN            |

|                 |                 |                 |                 |                 |
|-----------------|-----------------|-----------------|-----------------|-----------------|
| TCGA-CZ-5459-01 | TCGA-B0-5096-01 | TCGA-B8-A54J-01 | TCGA-BP-4987-01 | TCGA-B2-5641-01 |
| NOCHANGE        | NOCHANGE        | NOCHANGE        | NOCHANGE        | NOCHANGE        |
| UP              | UP              | UP              | UP              | UP              |
| NOCHANGE        | NOCHANGE        | NOCHANGE        | NOCHANGE        | NOCHANGE        |
| DOWN            | DOWN            | DOWN            | DOWN            | DOWN            |
| UP              | UP              | NOCHANGE        | NOCHANGE        | UP              |
| NOCHANGE        | NOCHANGE        | NOCHANGE        | NOCHANGE        | NOCHANGE        |
| DOWN            | NOCHANGE        | NOCHANGE        | DOWN            | DOWN            |
| NOCHANGE        | NOCHANGE        | NOCHANGE        | NOCHANGE        | NOCHANGE        |
| DOWN            | NOCHANGE        | DOWN            | DOWN            | NOCHANGE        |
| NOCHANGE        | NOCHANGE        | NOCHANGE        | NOCHANGE        | NOCHANGE        |
| NOCHANGE        | NOCHANGE        | NOCHANGE        | DOWN            | DOWN            |
| NOCHANGE        | NOCHANGE        | NOCHANGE        | DOWN            | UP              |
| NOCHANGE        | DOWN            | NOCHANGE        | NOCHANGE        | NOCHANGE        |
| NOCHANGE        | NOCHANGE        | NOCHANGE        | NOCHANGE        | NOCHANGE        |
| NOCHANGE        | DOWN            | NOCHANGE        | DOWN            | DOWN            |
| NOCHANGE        | NOCHANGE        | NOCHANGE        | UP              | NOCHANGE        |
| NOCHANGE        | NOCHANGE        | UP              | NOCHANGE        | NOCHANGE        |
| DOWN            | NOCHANGE        | NOCHANGE        | DOWN            | DOWN            |
| NOCHANGE        | NOCHANGE        | NOCHANGE        | UP              | NOCHANGE        |
| DOWN            | DOWN            | DOWN            | DOWN            | NOCHANGE        |
| NOCHANGE        | UP              | NOCHANGE        | NOCHANGE        | UP              |
| NOCHANGE        | NOCHANGE        | NOCHANGE        | UP              | UP              |
| DOWN            | UP              | NOCHANGE        | NOCHANGE        | NOCHANGE        |
| NOCHANGE        | NOCHANGE        | DOWN            | DOWN            | NOCHANGE        |
| DOWN            | DOWN            | DOWN            | NOCHANGE        | DOWN            |
| NOCHANGE        | NOCHANGE        | NOCHANGE        | NOCHANGE        | DOWN            |
| NOCHANGE        | NOCHANGE        | NOCHANGE        | NOCHANGE        | NOCHANGE        |
| NOCHANGE        | NOCHANGE        | NOCHANGE        | NOCHANGE        | NOCHANGE        |
| NOCHANGE        | NOCHANGE        | NOCHANGE        | NOCHANGE        | NOCHANGE        |
| DOWN            | NOCHANGE        | NOCHANGE        | DOWN            | DOWN            |
| NOCHANGE        | DOWN            | NOCHANGE        | NOCHANGE        | DOWN            |
| DOWN            | DOWN            | DOWN            | NOCHANGE        | NOCHANGE        |

|                 |                 |                 |                 |                 |
|-----------------|-----------------|-----------------|-----------------|-----------------|
| TCGA-AK-3426-01 | TCGA-B4-5377-01 | TCGA-BP-4342-01 | TCGA-BP-4983-01 | TCGA-B0-4833-01 |
| NOCHANGE        | NOCHANGE        | NOCHANGE        | UP              | NOCHANGE        |
| UP              | UP              | UP              | UP              | UP              |
| NOCHANGE        | NOCHANGE        | NOCHANGE        | NOCHANGE        | NOCHANGE        |
| DOWN            | DOWN            | DOWN            | DOWN            | DOWN            |
| NOCHANGE        | NOCHANGE        | NOCHANGE        | NOCHANGE        | NOCHANGE        |
| DOWN            | NOCHANGE        | NOCHANGE        | DOWN            | NOCHANGE        |
| DOWN            | DOWN            | NOCHANGE        | NOCHANGE        | NOCHANGE        |
| NOCHANGE        | NOCHANGE        | NOCHANGE        | NOCHANGE        | NOCHANGE        |
| NOCHANGE        | UP              | NOCHANGE        | NOCHANGE        | NOCHANGE        |
| NOCHANGE        | NOCHANGE        | NOCHANGE        | NOCHANGE        | NOCHANGE        |
| UP              | NOCHANGE        | NOCHANGE        | NOCHANGE        | NOCHANGE        |
| UP              | DOWN            | NOCHANGE        | NOCHANGE        | NOCHANGE        |
| DOWN            | NOCHANGE        | NOCHANGE        | DOWN            | NOCHANGE        |
| DOWN            | NOCHANGE        | NOCHANGE        | NOCHANGE        | NOCHANGE        |
| NOCHANGE        | DOWN            | DOWN            | DOWN            | DOWN            |
| NOCHANGE        | NOCHANGE        | NOCHANGE        | NOCHANGE        | NOCHANGE        |
| DOWN            | UP              | NOCHANGE        | UP              | NOCHANGE        |
| DOWN            | NOCHANGE        | DOWN            | DOWN            | NOCHANGE        |
| NOCHANGE        | NOCHANGE        | NOCHANGE        | NOCHANGE        | NOCHANGE        |
| DOWN            | NOCHANGE        | UP              | DOWN            | DOWN            |
| NOCHANGE        | UP              | NOCHANGE        | UP              | NOCHANGE        |
| NOCHANGE        | UP              | NOCHANGE        | NOCHANGE        | NOCHANGE        |
| DOWN            | NOCHANGE        | NOCHANGE        | UP              | DOWN            |
| NOCHANGE        | NOCHANGE        | NOCHANGE        | DOWN            | NOCHANGE        |
| DOWN            | NOCHANGE        | DOWN            | DOWN            | DOWN            |
| NOCHANGE        | NOCHANGE        | DOWN            | DOWN            | NOCHANGE        |
| NOCHANGE        | NOCHANGE        | NOCHANGE        | NOCHANGE        | NOCHANGE        |
| NOCHANGE        | NOCHANGE        | NOCHANGE        | NOCHANGE        | NOCHANGE        |
| DOWN            | NOCHANGE        | NOCHANGE        | NOCHANGE        | DOWN            |
| NOCHANGE        | NOCHANGE        | NOCHANGE        | NOCHANGE        | NOCHANGE        |
| DOWN            | DOWN            | NOCHANGE        | NOCHANGE        | DOWN            |

| TCGA-AS-3777-01 | TCGA-CJ-4874-01 | TCGA-CJ-4887-01 | TCGA-AK-3428-01 | TCGA-B8-A54F-01 |
|-----------------|-----------------|-----------------|-----------------|-----------------|
| UP              | NOCHANGE        | NOCHANGE        | NOCHANGE        | NOCHANGE        |
| NOCHANGE        | UP              | UP              | UP              | UP              |
| NOCHANGE        | NOCHANGE        | NOCHANGE        | NOCHANGE        | NOCHANGE        |
| DOWN            | DOWN            | DOWN            | DOWN            | DOWN            |
| NOCHANGE        | UP              | NOCHANGE        | UP              | UP              |
| NOCHANGE        | UP              | NOCHANGE        | UP              | NOCHANGE        |
| NOCHANGE        | NOCHANGE        | DOWN            | DOWN            | NOCHANGE        |
| NOCHANGE        | NOCHANGE        | NOCHANGE        | NOCHANGE        | NOCHANGE        |
| UP              | NOCHANGE        | UP              | NOCHANGE        | NOCHANGE        |
| NOCHANGE        | NOCHANGE        | NOCHANGE        | NOCHANGE        | NOCHANGE        |
| DOWN            | NOCHANGE        | NOCHANGE        | NOCHANGE        | NOCHANGE        |
| DOWN            | NOCHANGE        | DOWN            | DOWN            | NOCHANGE        |
| NOCHANGE        | NOCHANGE        | NOCHANGE        | NOCHANGE        | NOCHANGE        |
| DOWN            | NOCHANGE        | DOWN            | NOCHANGE        | NOCHANGE        |
| DOWN            | DOWN            | NOCHANGE        | DOWN            | DOWN            |
| UP              | NOCHANGE        | NOCHANGE        | NOCHANGE        | UP              |
| DOWN            | NOCHANGE        | NOCHANGE        | UP              | NOCHANGE        |
| UP              | NOCHANGE        | NOCHANGE        | NOCHANGE        | NOCHANGE        |
| DOWN            | NOCHANGE        | NOCHANGE        | NOCHANGE        | UP              |
| NOCHANGE        | DOWN            | NOCHANGE        | DOWN            | NOCHANGE        |
| NOCHANGE        | NOCHANGE        | NOCHANGE        | NOCHANGE        | UP              |
| NOCHANGE        | NOCHANGE        | NOCHANGE        | UP              | UP              |
| NOCHANGE        | NOCHANGE        | DOWN            | NOCHANGE        | NOCHANGE        |
| UP              | NOCHANGE        | DOWN            | NOCHANGE        | NOCHANGE        |
| NOCHANGE        | NOCHANGE        | DOWN            | NOCHANGE        | NOCHANGE        |
| NOCHANGE        | NOCHANGE        | NOCHANGE        | NOCHANGE        | DOWN            |
| NOCHANGE        | NOCHANGE        | NOCHANGE        | NOCHANGE        | DOWN            |
| NOCHANGE        | NOCHANGE        | NOCHANGE        | NOCHANGE        | NOCHANGE        |
| DOWN            | NOCHANGE        | NOCHANGE        | NOCHANGE        | NOCHANGE        |
| DOWN            | DOWN            | DOWN            | NOCHANGE        | NOCHANGE        |
| DOWN            | NOCHANGE        | NOCHANGE        | NOCHANGE        | NOCHANGE        |
| DOWN            | NOCHANGE        | DOWN            | NOCHANGE        | DOWN            |



| TCGA-BP-5187-01. | TCGA-CJ-5681-01. | TCGA-B0-4696-01. | TCGA-B0-5710-01. | TCGA-BP-5175-01. |
|------------------|------------------|------------------|------------------|------------------|
| NOCHANGE         | DOWN             | DOWN             | NOCHANGE         | UP               |
| UP               | NOCHANGE         | NOCHANGE         | NOCHANGE         | UP               |
| NOCHANGE         | DOWN             | NOCHANGE         | NOCHANGE         | NOCHANGE         |
| NOCHANGE         | NOCHANGE         | NOCHANGE         | DOWN             | DOWN             |
| UP               | UP               | DOWN             | NOCHANGE         | UP               |
| NOCHANGE         | DOWN             | DOWN             | NOCHANGE         | NOCHANGE         |
| NOCHANGE         | NOCHANGE         | NOCHANGE         | DOWN             | DOWN             |
| NOCHANGE         | DOWN             | NOCHANGE         | NOCHANGE         | NOCHANGE         |
| UP               | NOCHANGE         | NOCHANGE         | UP               | NOCHANGE         |
| DOWN             | NOCHANGE         | NOCHANGE         | DOWN             | NOCHANGE         |
| NOCHANGE         | NOCHANGE         | UP               | NOCHANGE         | NOCHANGE         |
| UP               | UP               | DOWN             | NOCHANGE         | NOCHANGE         |
| NOCHANGE         | NOCHANGE         | DOWN             | NOCHANGE         | NOCHANGE         |
| NOCHANGE         | NOCHANGE         | UP               | NOCHANGE         | DOWN             |
| NOCHANGE         | DOWN             | DOWN             | DOWN             | DOWN             |
| UP               | UP               | NOCHANGE         | NOCHANGE         | DOWN             |
| NOCHANGE         | NOCHANGE         | NOCHANGE         | NOCHANGE         | DOWN             |
| DOWN             | NOCHANGE         | UP               | DOWN             | NOCHANGE         |
| NOCHANGE         | NOCHANGE         | DOWN             | UP               | NOCHANGE         |
| NOCHANGE         | DOWN             | DOWN             | NOCHANGE         | NOCHANGE         |
| NOCHANGE         | NOCHANGE         | NOCHANGE         | NOCHANGE         | NOCHANGE         |
| UP               | DOWN             | UP               | NOCHANGE         | NOCHANGE         |
| NOCHANGE         | UP               | NOCHANGE         | NOCHANGE         | DOWN             |
| DOWN             | NOCHANGE         | NOCHANGE         | DOWN             | DOWN             |
| DOWN             | NOCHANGE         | DOWN             | DOWN             | DOWN             |
| NOCHANGE         | UP               | UP               | NOCHANGE         | NOCHANGE         |
| UP               | NOCHANGE         | NOCHANGE         | NOCHANGE         | NOCHANGE         |
| NOCHANGE         | DOWN             | NOCHANGE         | NOCHANGE         | NOCHANGE         |
| NOCHANGE         | NOCHANGE         | DOWN             | NOCHANGE         | DOWN             |
| NOCHANGE         | DOWN             | NOCHANGE         | NOCHANGE         | DOWN             |
| NOCHANGE         | UP               | DOWN             | DOWN             | DOWN             |

| TCGA-DV-5569-01 | TCGA-BP-5189-01 | TCGA-AK-3443-01 | TCGA-CW-5589-01 | TCGA-B0-5109-01 |
|-----------------|-----------------|-----------------|-----------------|-----------------|
| NOCHANGE        | NOCHANGE        | DOWN            | NOCHANGE        | NOCHANGE        |
| UP              | UP              | NOCHANGE        | UP              | NOCHANGE        |
| NOCHANGE        | NOCHANGE        | NOCHANGE        | NOCHANGE        | NOCHANGE        |
| DOWN            | DOWN            | DOWN            | NOCHANGE        | DOWN            |
| NOCHANGE        | UP              | NOCHANGE        | NOCHANGE        | NOCHANGE        |
| NOCHANGE        | NOCHANGE        | DOWN            | NOCHANGE        | NOCHANGE        |
| DOWN            | DOWN            | NOCHANGE        | NOCHANGE        | NOCHANGE        |
| NOCHANGE        | NOCHANGE        | NOCHANGE        | NOCHANGE        | NOCHANGE        |
| DOWN            | NOCHANGE        | DOWN            | UP              | UP              |
| NOCHANGE        | NOCHANGE        | UP              | NOCHANGE        | NOCHANGE        |
| DOWN            | DOWN            | DOWN            | NOCHANGE        | NOCHANGE        |
| DOWN            | NOCHANGE        | NOCHANGE        | DOWN            | NOCHANGE        |
| NOCHANGE        | NOCHANGE        | NOCHANGE        | NOCHANGE        | DOWN            |
| NOCHANGE        | NOCHANGE        | DOWN            | NOCHANGE        | NOCHANGE        |
| DOWN            | DOWN            | DOWN            | NOCHANGE        | DOWN            |
| NOCHANGE        | NOCHANGE        | NOCHANGE        | NOCHANGE        | NOCHANGE        |
| UP              | NOCHANGE        | NOCHANGE        | NOCHANGE        | NOCHANGE        |
| NOCHANGE        | DOWN            | DOWN            | NOCHANGE        | DOWN            |
| NOCHANGE        | NOCHANGE        | NOCHANGE        | NOCHANGE        | NOCHANGE        |
| DOWN            | NOCHANGE        | DOWN            | DOWN            | DOWN            |
| NOCHANGE        | UP              | DOWN            | NOCHANGE        | NOCHANGE        |
| NOCHANGE        | NOCHANGE        | DOWN            | NOCHANGE        | NOCHANGE        |
| NOCHANGE        | NOCHANGE        | DOWN            | NOCHANGE        | NOCHANGE        |
| NOCHANGE        | DOWN            | NOCHANGE        | NOCHANGE        | DOWN            |
| DOWN            | NOCHANGE        | NOCHANGE        | NOCHANGE        | DOWN            |
| NOCHANGE        | NOCHANGE        | NOCHANGE        | NOCHANGE        | NOCHANGE        |
| NOCHANGE        | NOCHANGE        | NOCHANGE        | NOCHANGE        | NOCHANGE        |
| NOCHANGE        | NOCHANGE        | DOWN            | NOCHANGE        | UP              |
| NOCHANGE        | NOCHANGE        | NOCHANGE        | NOCHANGE        | NOCHANGE        |
| NOCHANGE        | NOCHANGE        | NOCHANGE        | NOCHANGE        | NOCHANGE        |
| NOCHANGE        | DOWN            | DOWN            | NOCHANGE        | NOCHANGE        |
| DOWN            | DOWN            | UP              | DOWN            | DOWN            |

| TCGA-B8-A8YJ-01 | TCGA-B0-4810-01 | TCGA-BP-5001-01 | TCGA-EU-5906-01 | TCGA-BP-4993-01 |
|-----------------|-----------------|-----------------|-----------------|-----------------|
| NOCHANGE        | NOCHANGE        | NOCHANGE        | NOCHANGE        | NOCHANGE        |
| UP              | UP              | UP              | UP              | UP              |
| NOCHANGE        | NOCHANGE        | NOCHANGE        | NOCHANGE        | NOCHANGE        |
| DOWN            | DOWN            | NOCHANGE        | DOWN            | DOWN            |
| NOCHANGE        | NOCHANGE        | DOWN            | NOCHANGE        | NOCHANGE        |
| NOCHANGE        | NOCHANGE        | NOCHANGE        | NOCHANGE        | NOCHANGE        |
| NOCHANGE        | NOCHANGE        | NOCHANGE        | DOWN            | DOWN            |
| NOCHANGE        | NOCHANGE        | DOWN            | DOWN            | NOCHANGE        |
| DOWN            | NOCHANGE        | UP              | NOCHANGE        | DOWN            |
| NOCHANGE        | NOCHANGE        | NOCHANGE        | NOCHANGE        | NOCHANGE        |
| DOWN            | NOCHANGE        | UP              | NOCHANGE        | NOCHANGE        |
| DOWN            | NOCHANGE        | NOCHANGE        | NOCHANGE        | NOCHANGE        |
| NOCHANGE        | NOCHANGE        | NOCHANGE        | NOCHANGE        | NOCHANGE        |
| NOCHANGE        | NOCHANGE        | DOWN            | NOCHANGE        | NOCHANGE        |
| NOCHANGE        | NOCHANGE        | DOWN            | DOWN            | NOCHANGE        |
| NOCHANGE        | NOCHANGE        | NOCHANGE        | NOCHANGE        | NOCHANGE        |
| UP              | NOCHANGE        | DOWN            | UP              | UP              |
| DOWN            | NOCHANGE        | NOCHANGE        | DOWN            | DOWN            |
| NOCHANGE        | NOCHANGE        | NOCHANGE        | NOCHANGE        | NOCHANGE        |
| DOWN            | DOWN            | DOWN            | DOWN            | DOWN            |
| NOCHANGE        | NOCHANGE        | NOCHANGE        | UP              | NOCHANGE        |
| UP              | NOCHANGE        | NOCHANGE        | NOCHANGE        | NOCHANGE        |
| NOCHANGE        | NOCHANGE        | DOWN            | NOCHANGE        | NOCHANGE        |
| DOWN            | NOCHANGE        | NOCHANGE        | DOWN            | DOWN            |
| DOWN            | DOWN            | DOWN            | NOCHANGE        | DOWN            |
| DOWN            | NOCHANGE        | DOWN            | NOCHANGE        | NOCHANGE        |
| NOCHANGE        | UP              | UP              | NOCHANGE        | NOCHANGE        |
| UP              | NOCHANGE        | NOCHANGE        | NOCHANGE        | NOCHANGE        |
| NOCHANGE        | NOCHANGE        | DOWN            | NOCHANGE        | NOCHANGE        |
| NOCHANGE        | NOCHANGE        | NOCHANGE        | NOCHANGE        | NOCHANGE        |
| DOWN            | DOWN            | DOWN            | NOCHANGE        | DOWN            |

|                  |                 |                |                  |                  |
|------------------|-----------------|----------------|------------------|------------------|
| TCGA-B0-4823-01. | TCGA-DV-5576-01 | TCGA-MM-A563-0 | TCGA-BP-5192-01. | TCGA-CJ-4868-01/ |
| NOCHANGE         | NOCHANGE        | NOCHANGE       | NOCHANGE         | NOCHANGE         |
| UP               | NOCHANGE        | UP             | UP               | UP               |
| NOCHANGE         | NOCHANGE        | NOCHANGE       | NOCHANGE         | NOCHANGE         |
| DOWN             | NOCHANGE        | DOWN           | DOWN             | DOWN             |
| NOCHANGE         | DOWN            | NOCHANGE       | DOWN             | NOCHANGE         |
| NOCHANGE         | NOCHANGE        | NOCHANGE       | NOCHANGE         | NOCHANGE         |
| DOWN             | DOWN            | NOCHANGE       | DOWN             | NOCHANGE         |
| NOCHANGE         | NOCHANGE        | NOCHANGE       | DOWN             | NOCHANGE         |
| DOWN             | NOCHANGE        | NOCHANGE       | DOWN             | NOCHANGE         |
| NOCHANGE         | NOCHANGE        | NOCHANGE       | NOCHANGE         | NOCHANGE         |
| NOCHANGE         | DOWN            | UP             | NOCHANGE         | DOWN             |
| NOCHANGE         | NOCHANGE        | UP             | DOWN             | NOCHANGE         |
| NOCHANGE         | NOCHANGE        | NOCHANGE       | NOCHANGE         | NOCHANGE         |
| NOCHANGE         | NOCHANGE        | DOWN           | NOCHANGE         | NOCHANGE         |
| NOCHANGE         | NOCHANGE        | NOCHANGE       | DOWN             | NOCHANGE         |
| NOCHANGE         | NOCHANGE        | NOCHANGE       | NOCHANGE         | NOCHANGE         |
| NOCHANGE         | NOCHANGE        | NOCHANGE       | NOCHANGE         | NOCHANGE         |
| NOCHANGE         | NOCHANGE        | NOCHANGE       | NOCHANGE         | NOCHANGE         |
| NOCHANGE         | NOCHANGE        | NOCHANGE       | NOCHANGE         | NOCHANGE         |
| DOWN             | DOWN            | NOCHANGE       | NOCHANGE         | DOWN             |
| NOCHANGE         | NOCHANGE        | NOCHANGE       | UP               | NOCHANGE         |
| DOWN             | DOWN            | DOWN           | NOCHANGE         | DOWN             |
| NOCHANGE         | NOCHANGE        | UP             | NOCHANGE         | UP               |
| NOCHANGE         | UP              | UP             | NOCHANGE         | UP               |
| NOCHANGE         | DOWN            | NOCHANGE       | NOCHANGE         | NOCHANGE         |
| NOCHANGE         | NOCHANGE        | NOCHANGE       | NOCHANGE         | DOWN             |
| DOWN             | DOWN            | DOWN           | NOCHANGE         | DOWN             |
| NOCHANGE         | NOCHANGE        | NOCHANGE       | NOCHANGE         | NOCHANGE         |
| NOCHANGE         | NOCHANGE        | NOCHANGE       | NOCHANGE         | NOCHANGE         |
| NOCHANGE         | NOCHANGE        | NOCHANGE       | NOCHANGE         | NOCHANGE         |
| NOCHANGE         | NOCHANGE        | NOCHANGE       | NOCHANGE         | NOCHANGE         |
| NOCHANGE         | NOCHANGE        | NOCHANGE       | NOCHANGE         | NOCHANGE         |
| NOCHANGE         | NOCHANGE        | NOCHANGE       | NOCHANGE         | DOWN             |
| NOCHANGE         | DOWN            | NOCHANGE       | NOCHANGE         | NOCHANGE         |
| DOWN             | DOWN            | DOWN           | DOWN             | DOWN             |

| TCGA-A3-A8OU-0 | TCGA-B0-4718-01 | TCGA-DV-5568-01 | TCGA-AK-3456-01 | TCGA-B0-4837-01 |
|----------------|-----------------|-----------------|-----------------|-----------------|
| NOCHANGE       | NOCHANGE        | NOCHANGE        | NOCHANGE        | UP              |
| UP             | UP              | UP              | UP              | UP              |
| NOCHANGE       | NOCHANGE        | NOCHANGE        | NOCHANGE        | NOCHANGE        |
| DOWN           | DOWN            | DOWN            | DOWN            | DOWN            |
| NOCHANGE       | NOCHANGE        | UP              | NOCHANGE        | NOCHANGE        |
| NOCHANGE       | NOCHANGE        | NOCHANGE        | UP              | UP              |
| NOCHANGE       | DOWN            | DOWN            | DOWN            | DOWN            |
| NOCHANGE       | NOCHANGE        | NOCHANGE        | DOWN            | NOCHANGE        |
| DOWN           | NOCHANGE        | NOCHANGE        | DOWN            | NOCHANGE        |
| NOCHANGE       | NOCHANGE        | NOCHANGE        | NOCHANGE        | NOCHANGE        |
| NOCHANGE       | UP              | NOCHANGE        | DOWN            | NOCHANGE        |
| NOCHANGE       | NOCHANGE        | NOCHANGE        | NOCHANGE        | NOCHANGE        |
| NOCHANGE       | NOCHANGE        | NOCHANGE        | NOCHANGE        | NOCHANGE        |
| NOCHANGE       | DOWN            | DOWN            | NOCHANGE        | NOCHANGE        |
| DOWN           | DOWN            | NOCHANGE        | NOCHANGE        | DOWN            |
| NOCHANGE       | NOCHANGE        | NOCHANGE        | UP              | NOCHANGE        |
| NOCHANGE       | NOCHANGE        | NOCHANGE        | NOCHANGE        | NOCHANGE        |
| DOWN           | DOWN            | NOCHANGE        | DOWN            | NOCHANGE        |
| NOCHANGE       | NOCHANGE        | DOWN            | NOCHANGE        | NOCHANGE        |
| NOCHANGE       | NOCHANGE        | DOWN            | NOCHANGE        | NOCHANGE        |
| NOCHANGE       | NOCHANGE        | NOCHANGE        | NOCHANGE        | NOCHANGE        |
| NOCHANGE       | NOCHANGE        | UP              | NOCHANGE        | UP              |
| DOWN           | DOWN            | DOWN            | UP              | UP              |
| NOCHANGE       | NOCHANGE        | NOCHANGE        | DOWN            | NOCHANGE        |
| DOWN           | DOWN            | DOWN            | DOWN            | DOWN            |
| DOWN           | NOCHANGE        | NOCHANGE        | DOWN            | NOCHANGE        |
| NOCHANGE       | NOCHANGE        | NOCHANGE        | NOCHANGE        | NOCHANGE        |
| NOCHANGE       | NOCHANGE        | NOCHANGE        | NOCHANGE        | NOCHANGE        |
| NOCHANGE       | NOCHANGE        | NOCHANGE        | NOCHANGE        | NOCHANGE        |
| NOCHANGE       | NOCHANGE        | DOWN            | NOCHANGE        | DOWN            |
| NOCHANGE       | NOCHANGE        | NOCHANGE        | DOWN            | NOCHANGE        |
| DOWN           | DOWN            | DOWN            | NOCHANGE        | NOCHANGE        |

| TCGA-B0-4694-01 | TCGA-BP-4334-01 | TCGA-B8-4146-01 | TCGA-CZ-4854-01 | TCGA-DV-5575-01 |
|-----------------|-----------------|-----------------|-----------------|-----------------|
| NOCHANGE        | DOWN            | NOCHANGE        | UP              | NOCHANGE        |
| UP              | NOCHANGE        | UP              | UP              | UP              |
| NOCHANGE        | NOCHANGE        | NOCHANGE        | NOCHANGE        | NOCHANGE        |
| DOWN            | DOWN            | NOCHANGE        | DOWN            | DOWN            |
| UP              | DOWN            | UP              | NOCHANGE        | NOCHANGE        |
| NOCHANGE        | DOWN            | NOCHANGE        | NOCHANGE        | NOCHANGE        |
| DOWN            | NOCHANGE        | DOWN            | DOWN            | NOCHANGE        |
| NOCHANGE        | DOWN            | NOCHANGE        | NOCHANGE        | NOCHANGE        |
| NOCHANGE        | NOCHANGE        | NOCHANGE        | NOCHANGE        | NOCHANGE        |
| NOCHANGE        | UP              | DOWN            | DOWN            | NOCHANGE        |
| NOCHANGE        | NOCHANGE        | UP              | NOCHANGE        | NOCHANGE        |
| NOCHANGE        | DOWN            | DOWN            | NOCHANGE        | NOCHANGE        |
| NOCHANGE        | NOCHANGE        | NOCHANGE        | NOCHANGE        | NOCHANGE        |
| NOCHANGE        | DOWN            | UP              | NOCHANGE        | NOCHANGE        |
| NOCHANGE        | DOWN            | DOWN            | DOWN            | NOCHANGE        |
| NOCHANGE        | NOCHANGE        | UP              | NOCHANGE        | NOCHANGE        |
| NOCHANGE        | DOWN            | NOCHANGE        | NOCHANGE        | UP              |
| NOCHANGE        | DOWN            | DOWN            | NOCHANGE        | DOWN            |
| NOCHANGE        | DOWN            | UP              | UP              | NOCHANGE        |
| NOCHANGE        | DOWN            | DOWN            | UP              | DOWN            |
| UP              | NOCHANGE        | UP              | NOCHANGE        | NOCHANGE        |
| UP              | DOWN            | NOCHANGE        | UP              | UP              |
| NOCHANGE        | DOWN            | NOCHANGE        | UP              | NOCHANGE        |
| NOCHANGE        | UP              | DOWN            | DOWN            | NOCHANGE        |
| DOWN            | DOWN            | NOCHANGE        | DOWN            | DOWN            |
| NOCHANGE        | DOWN            | NOCHANGE        | DOWN            | NOCHANGE        |
| NOCHANGE        | UP              | NOCHANGE        | NOCHANGE        | NOCHANGE        |
| NOCHANGE        | NOCHANGE        | NOCHANGE        | NOCHANGE        | NOCHANGE        |
| DOWN            | DOWN            | NOCHANGE        | NOCHANGE        | NOCHANGE        |
| NOCHANGE        | DOWN            | NOCHANGE        | NOCHANGE        | UP              |
| DOWN            | NOCHANGE        | DOWN            | DOWN            | DOWN            |

A-01R-1541-07

**Table S7: Clusters and OS-score information**

| Cluster                      | Oxidativestress_score | P = 7.73e-13 |
|------------------------------|-----------------------|--------------|
| TCGA-A3-3306-01A-01R-0864-07 | C1                    | -0.053583137 |
| TCGA-A3-3329-01A-01R-0864-07 | C2                    | 0.357430504  |
| TCGA-B8-5550-01A-01R-1541-07 | C2                    | 0.360308637  |
| TCGA-A3-3378-01A-02R-1325-07 | C2                    | 0.105401557  |
| TCGA-A3-3343-01A-01R-0864-07 | C3                    | 0.135505277  |
| TCGA-B0-5100-01A-01R-1420-07 | C3                    | -0.381551951 |
| TCGA-CJ-4869-01A-02R-1426-07 | C2                    | 0.400899578  |
| TCGA-CJ-4895-01A-01R-1305-07 | C2                    | 0.369759761  |
| TCGA-B0-5691-01A-11R-1541-07 | C2                    | 0.027536506  |
| TCGA-B0-5121-01A-02R-1420-07 | C3                    | -0.186310164 |
| TCGA-B0-5098-01A-01R-1420-07 | C2                    | -0.25634248  |
| TCGA-A3-3308-01A-02R-1325-07 | C2                    | -0.191070546 |
| TCGA-BP-4807-01A-01R-1305-07 | C2                    | 0.4421327    |
| TCGA-B0-5707-01A-11R-1541-07 | C2                    | 0.174962375  |
| TCGA-BP-4971-01A-01R-1334-07 | C3                    | -0.47718997  |
| TCGA-B8-4620-01A-02R-1325-07 | C2                    | -0.190079084 |
| TCGA-BP-4967-01A-01R-1334-07 | C2                    | -0.21335267  |
| TCGA-BP-5198-01A-01R-1426-07 | C2                    | 0.181643621  |
| TCGA-BP-4326-01A-01R-1289-07 | C2                    | -0.120723971 |
| TCGA-CJ-4904-01A-02R-1426-07 | C2                    | -0.031984153 |
| TCGA-CZ-4853-01A-01R-1426-07 | C1                    | 0.176933005  |
| TCGA-A3-3387-01A-01R-1541-07 | C2                    | 0.031713714  |
| TCGA-A3-3326-01A-01R-0864-07 | C2                    | -0.020968589 |
| TCGA-BP-4784-01A-01R-1305-07 | C3                    | -0.337361259 |
| TCGA-BP-4766-01A-01R-1289-07 | C2                    | 0.060148064  |
| TCGA-CZ-5456-01A-01R-1503-07 | C2                    | 0.308035542  |
| TCGA-CZ-4857-01A-01R-1305-07 | C2                    | -0.222342676 |
| TCGA-B0-5400-01A-01R-1503-07 | C3                    | 0.350268026  |
| TCGA-BP-5010-01A-02R-1420-07 | C3                    | -0.101350232 |
| TCGA-CJ-4644-01A-02R-1325-07 | C1                    | 0.199884596  |
| TCGA-CJ-6033-01A-11R-1672-07 | C3                    | -0.043147025 |
| TCGA-EU-5907-01A-11R-1672-07 | C1                    | -0.02644218  |
| TCGA-B4-5836-01A-11R-1672-07 | C2                    | 0.329264829  |
| TCGA-A3-3323-01A-02R-1325-07 | C2                    | -0.204407097 |
| TCGA-BP-4353-01A-02R-1289-07 | C2                    | 0.003179241  |
| TCGA-B0-5077-01A-01R-1334-07 | C2                    | -0.140464412 |
| TCGA-CZ-5984-01A-11R-1672-07 | C2                    | 0.20878858   |
| TCGA-B8-A54G-01A-11R-A266-07 | C2                    | -0.067868402 |
| TCGA-B0-4713-01A-01R-1277-07 | C2                    | 0.270017927  |
| TCGA-CZ-5463-01A-01R-1503-07 | C1                    | 0.033667589  |
| TCGA-6D-AA2E-01A-11R-A37O-07 | C2                    | 0.297482238  |
| TCGA-CJ-6032-01A-11R-1672-07 | C2                    | 0.289623469  |
| TCGA-BP-4801-01A-02R-1420-07 | C2                    | 0.414099494  |
| TCGA-EU-5904-01A-11R-1672-07 | C2                    | 0.380937906  |
| TCGA-B8-5158-01A-01R-1420-07 | C2                    | 0.344677223  |
| TCGA-BP-4969-01A-01R-1334-07 | C3                    | -0.261466871 |
| TCGA-B8-5546-01A-01R-1541-07 | C1                    | 0.027413278  |



|                              |    |              |
|------------------------------|----|--------------|
| TCGA-B4-5844-01A-11R-1672-07 | C2 | 0.032963348  |
| TCGA-CZ-5452-01A-01R-1503-07 | C2 | 0.056737663  |
| TCGA-BP-4991-01A-01R-1334-07 | C2 | -0.340220247 |
| TCGA-A3-3316-01A-01R-0864-07 | C2 | 0.024114721  |
| TCGA-B8-A54E-01A-11R-A266-07 | C1 | 0.254368034  |
| TCGA-BP-5170-01A-01R-1426-07 | C3 | 0.063207673  |
| TCGA-A3-A6NI-01A-11R-A33J-07 | C2 | 0.126177382  |
| TCGA-B0-5711-01A-11R-1672-07 | C1 | -0.075323747 |
| TCGA-CZ-5451-01A-01R-1503-07 | C1 | 0.346485243  |
| TCGA-BP-4340-01A-01R-1289-07 | C2 | 0.111797006  |
| TCGA-BP-5180-01A-01R-1426-07 | C1 | 0.247436108  |
| TCGA-CJ-4639-01A-02R-1325-07 | C1 | -0.296431928 |
| TCGA-B0-4821-01A-01R-1503-07 | C3 | -0.204767572 |
| TCGA-CZ-4860-01A-01R-1305-07 | C2 | 0.189519371  |
| TCGA-B0-4813-01A-01R-1277-07 | C3 | -0.412689717 |
| TCGA-B8-4619-01A-02R-1325-07 | C1 | -0.195128012 |
| TCGA-CJ-4892-01A-01R-1305-07 | C1 | -0.249979416 |
| TCGA-CJ-4916-01A-01R-1426-07 | C3 | -0.306193082 |
| TCGA-BP-4964-01A-01R-1334-07 | C2 | 0.058423565  |
| TCGA-B0-5712-01A-11R-1672-07 | C1 | 0.418625874  |
| TCGA-BP-4965-01A-01R-1334-07 | C2 | 0.006767381  |
| TCGA-BP-5199-01A-01R-1426-07 | C3 | -0.414380222 |
| TCGA-BP-4973-01A-01R-1334-07 | C2 | -0.236090558 |
| TCGA-B2-5635-01A-01R-A277-07 | C2 | -0.053585004 |
| TCGA-B0-4844-01A-01R-1277-07 | C3 | 0.071570814  |
| TCGA-G6-A8L7-01A-11R-A37O-07 | C3 | -0.106705437 |
| TCGA-B0-5088-01A-01R-1334-07 | C3 | 0.05006076   |
| TCGA-A3-3324-01A-02R-1325-07 | C2 | -0.129870048 |
| TCGA-BP-4968-01A-01R-1334-07 | C3 | -0.148878559 |
| TCGA-BP-4352-01A-01R-1289-07 | C3 | -0.137560768 |
| TCGA-CJ-4872-01A-01R-1305-07 | C2 | 0.067686789  |
| TCGA-DV-A4VZ-01A-11R-A266-07 | C3 | -0.40697873  |
| TCGA-BP-5006-01A-01R-1334-07 | C2 | 0.04016287   |
| TCGA-BP-5009-01A-01R-1334-07 | C2 | -0.229386049 |
| TCGA-B0-4699-01A-01R-1277-07 | C3 | -0.258068495 |
| TCGA-B0-4834-01A-01R-1305-07 | C1 | -0.141718204 |
| TCGA-BP-4998-01A-01R-1334-07 | C2 | -0.335985939 |
| TCGA-B0-5104-01A-01R-1420-07 | C2 | 0.085757563  |
| TCGA-B0-4945-01A-01R-1420-07 | C3 | -0.253181797 |
| TCGA-B0-4842-01A-02R-1420-07 | C3 | 0.304409087  |
| TCGA-AK-3447-01A-01R-1766-07 | C1 | 0.146691116  |
| TCGA-B8-5551-01A-01R-1541-07 | C2 | -0.085560902 |
| TCGA-A3-3349-01A-01R-1188-07 | C2 | -0.332710599 |
| TCGA-B0-4693-01A-01R-1277-07 | C2 | 0.119147472  |
| TCGA-A3-3346-01A-01R-1766-07 | C2 | 0.215113534  |
| TCGA-B0-5120-01A-01R-1420-07 | C1 | -0.012499243 |
| TCGA-BP-5177-01A-01R-1426-07 | C2 | -0.038536794 |
| TCGA-B8-4154-01A-01R-1188-07 | C1 | 0.297893605  |
| TCGA-B8-4153-01B-11R-1672-07 | C3 | 0.129255657  |

|                              |    |              |
|------------------------------|----|--------------|
| TCGA-CJ-6030-01A-11R-1672-07 | C1 | 0.213652595  |
| TCGA-CW-5584-01A-01R-1541-07 | C2 | 0.150766614  |
| TCGA-B0-5696-01A-11R-1541-07 | C2 | 0.419168312  |
| TCGA-BP-4765-01A-01R-1289-07 | C2 | 0.12882106   |
| TCGA-BP-4782-01A-02R-1420-07 | C2 | 0.352847425  |
| TCGA-B8-5165-01A-01R-1420-07 | C2 | 0.04033482   |
| TCGA-B2-3923-01A-02R-A277-07 | C1 | -0.110822225 |
| TCGA-AK-3425-01A-02R-1277-07 | C2 | 0.42425801   |
| TCGA-AS-3778-01A-01R-A32Z-07 | C3 | -0.171561831 |
| TCGA-CW-6087-01A-11R-1672-07 | C2 | -0.063822133 |
| TCGA-B0-5108-01A-01R-1420-07 | C2 | 0.005020772  |
| TCGA-B0-5699-01A-11R-1541-07 | C1 | 0.154156521  |
| TCGA-B0-4814-01A-01R-1277-07 | C1 | 0.160550064  |
| TCGA-AK-3465-01A-02R-1325-07 | C1 | -0.186380228 |
| TCGA-CJ-4918-01A-01R-1426-07 | C2 | -0.064310434 |
| TCGA-BP-4344-01A-01R-1289-07 | C2 | -0.255232082 |
| TCGA-B4-5835-01A-11R-1672-07 | C2 | 0.456567146  |
| TCGA-A3-3372-01A-02R-1325-07 | C2 | -0.390968369 |
| TCGA-BP-4981-01A-01R-1334-07 | C3 | -0.137117221 |
| TCGA-BP-4170-01A-02R-1289-07 | C1 | 0.286618     |
| TCGA-CJ-4643-01A-02R-1325-07 | C2 | -0.152976371 |
| TCGA-BP-4977-01A-01R-1334-07 | C2 | 0.20126653   |
| TCGA-B2-5633-01A-01R-1541-07 | C2 | -0.374374275 |
| TCGA-A3-3311-01A-02R-1325-07 | C1 | 0.370421306  |
| TCGA-BP-5173-01A-01R-1426-07 | C3 | -0.012130397 |
| TCGA-BP-5007-01A-01R-1334-07 | C3 | -0.360608944 |
| TCGA-A3-3362-01A-02R-1325-07 | C2 | 0.125993864  |
| TCGA-BP-4781-01A-01R-1305-07 | C2 | 0.045410425  |
| TCGA-A3-3365-01A-01R-0864-07 | C2 | -0.282760171 |
| TCGA-DV-A4W0-01A-11R-A266-07 | C2 | 0.258397544  |
| TCGA-B0-5092-01A-01R-1420-07 | C3 | -0.388207464 |
| TCGA-CJ-5683-01A-11R-1541-07 | C3 | 0.190700793  |
| TCGA-BP-4331-01A-01R-1289-07 | C2 | -0.440466859 |
| TCGA-B2-A4SR-01A-11R-A266-07 | C2 | -0.432662847 |
| TCGA-BP-4976-01A-01R-1334-07 | C1 | -0.020734368 |
| TCGA-B2-4099-01A-02R-1188-07 | C1 | 0.174351045  |
| TCGA-B2-3923-01B-10R-A277-07 | C1 | -0.086104742 |
| TCGA-G6-A5PC-01A-11R-A33J-07 | C3 | 0.156510171  |
| TCGA-B0-5812-01A-11R-1672-07 | C2 | 0.100355976  |
| TCGA-BP-4341-01A-01R-1289-07 | C3 | -0.298706635 |
| TCGA-BP-4795-01A-02R-1420-07 | C3 | -0.285747102 |
| TCGA-AK-3451-01A-02R-1188-07 | C3 | 0.370580741  |
| TCGA-CZ-5987-01A-11R-1672-07 | C3 | 0.135345494  |
| TCGA-MM-A564-01A-11R-A266-07 | C3 | -0.291446854 |
| TCGA-BP-4787-01A-01R-1305-07 | C2 | 0.338096326  |
| TCGA-DV-5566-01A-01R-1541-07 | C1 | 0.370849952  |
| TCGA-BP-5190-01A-01R-1426-07 | C2 | 0.365389765  |
| TCGA-BP-4162-01A-02R-1325-07 | C2 | -0.053833065 |
| TCGA-BP-4343-01A-02R-1289-07 | C1 | -0.034952361 |

|                              |    |              |
|------------------------------|----|--------------|
| TCGA-AK-3458-01A-01R-1503-07 | C3 | -0.099850284 |
| TCGA-CZ-5457-01A-01R-1503-07 | C2 | 0.166460302  |
| TCGA-A3-A8OX-01A-11R-A37O-07 | C2 | 0.290468621  |
| TCGA-B0-4817-01A-01R-1277-07 | C2 | 0.489508841  |
| TCGA-CJ-4888-01A-01R-1305-07 | C2 | 0.061381205  |
| TCGA-BP-5191-01A-01R-1426-07 | C3 | 0.081467645  |
| TCGA-B2-5635-01A-01R-1541-07 | C2 | -0.072642173 |
| TCGA-T7-A92I-01A-11R-A37O-07 | C2 | 0.246075327  |
| TCGA-CJ-4901-01A-01R-1426-07 | C2 | -0.30427806  |
| TCGA-G6-A8L8-01A-21R-A37O-07 | C3 | -0.121838675 |
| TCGA-BP-4173-01A-02R-1289-07 | C2 | -0.202173391 |
| TCGA-AK-3434-01A-02R-1277-07 | C3 | -0.12551069  |
| TCGA-BP-4329-01A-02R-1289-07 | C1 | 0.453409564  |
| TCGA-CZ-5462-01A-01R-1503-07 | C2 | 0.508519451  |
| TCGA-B0-4706-01A-01R-1503-07 | C2 | -0.196259939 |
| TCGA-CJ-4920-01A-01R-1426-07 | C2 | -0.008793477 |
| TCGA-B8-A54I-01A-21R-A33J-07 | C3 | 0.133957863  |
| TCGA-CJ-4893-01A-01R-1305-07 | C2 | 0.217184992  |
| TCGA-BP-4960-01A-01R-1334-07 | C3 | -0.1648053   |
| TCGA-B2-3924-01A-02R-1325-07 | C1 | 0.038301133  |
| TCGA-B2-3923-01A-02R-1325-07 | C1 | -0.058644371 |
| TCGA-BP-5185-01A-01R-1426-07 | C3 | 0.126196274  |
| TCGA-A3-3357-01A-02R-1420-07 | C2 | 0.34873651   |
| TCGA-A3-A8CQ-01A-11R-A37O-07 | C2 | -0.325623463 |
| TCGA-BP-5176-01A-01R-1426-07 | C1 | 0.391844401  |
| TCGA-BP-4160-01A-02R-1289-07 | C2 | 0.210293905  |
| TCGA-B2-3924-01A-02R-A277-07 | C2 | -0.226007021 |
| TCGA-B0-4822-01A-01R-1277-07 | C3 | -0.217107608 |
| TCGA-A3-3328-01A-01R-0864-07 | C1 | -0.041675613 |
| TCGA-CW-5583-01A-02R-1541-07 | C2 | -0.108610549 |
| TCGA-B8-4148-01A-02R-1325-07 | C2 | -0.50172036  |
| TCGA-BP-4959-01A-01R-1334-07 | C2 | 0.224750112  |
| TCGA-B0-5097-01A-01R-1420-07 | C2 | 0.181643121  |
| TCGA-CW-6090-01A-11R-1672-07 | C1 | 0.185847663  |
| TCGA-B2-4102-01A-02R-1325-07 | C2 | -0.2261456   |
| TCGA-BP-4799-01A-01R-1305-07 | C3 | 0.285918198  |
| TCGA-BP-4177-01A-02R-1420-07 | C3 | -0.27056082  |
| TCGA-CZ-4858-01A-01R-1305-07 | C3 | -0.536921305 |
| TCGA-AK-3450-01A-02R-1277-07 | C1 | 0.334782712  |
| TCGA-B0-5102-01A-01R-1420-07 | C3 | -0.050965864 |
| TCGA-BP-4167-01A-02R-1325-07 | C3 | 0.119526875  |
| TCGA-BP-4989-01A-01R-1334-07 | C2 | -0.411674463 |
| TCGA-BP-5200-01A-01R-1426-07 | C2 | -0.076626407 |
| TCGA-B0-4818-01A-01R-1503-07 | C2 | -0.124837299 |
| TCGA-B0-4714-01A-01R-1277-07 | C2 | -0.590863978 |
| TCGA-3Z-A93Z-01A-11R-A37O-07 | C2 | -0.169449068 |
| TCGA-DV-5574-01A-01R-1541-07 | C2 | 0.126959378  |
| TCGA-BP-5194-01A-02R-1426-07 | C1 | 0.13179743   |
| TCGA-BP-4961-01A-01R-1334-07 | C2 | -0.284215525 |

|                              |    |              |
|------------------------------|----|--------------|
| TCGA-BP-4963-01A-01R-1334-07 | C1 | -0.144626432 |
| TCGA-AK-3460-01A-02R-1277-07 | C3 | -0.164561227 |
| TCGA-B8-5545-01A-01R-1672-07 | C2 | -0.024701993 |
| TCGA-BP-4165-01A-02R-1289-07 | C1 | -0.192249819 |
| TCGA-DV-A4VX-01A-11R-A266-07 | C2 | 0.54036279   |
| TCGA-B0-4846-01A-01R-1277-07 | C2 | -0.007149073 |
| TCGA-CZ-5453-01A-01R-1503-07 | C1 | 0.178305571  |
| TCGA-B0-5095-01A-01R-1420-07 | C2 | -0.353443542 |
| TCGA-BP-4972-01A-01R-1334-07 | C2 | 0.147722687  |
| TCGA-B0-4712-01A-01R-1503-07 | C2 | 0.178644427  |
| TCGA-BP-4164-01A-02R-1325-07 | C1 | 0.039582128  |
| TCGA-CZ-5454-01A-01R-1503-07 | C1 | 0.453980309  |
| TCGA-BP-5202-01A-02R-1426-07 | C1 | 0.358875149  |
| TCGA-CZ-5470-01A-01R-1503-07 | C1 | 0.33030495   |
| TCGA-CJ-4902-01A-01R-1426-07 | C3 | -0.368324336 |
| TCGA-CJ-4905-01A-02R-1426-07 | C2 | -0.215402619 |
| TCGA-B0-5075-01A-01R-1334-07 | C2 | 0.455613602  |
| TCGA-BP-4798-01A-01R-1305-07 | C2 | -0.331215106 |
| TCGA-CJ-4882-01A-02R-1426-07 | C3 | -0.352423993 |
| TCGA-B0-5706-01A-11R-1541-07 | C2 | -0.117871823 |
| TCGA-CJ-4891-01A-01R-1305-07 | C2 | 0.306958141  |
| TCGA-CZ-5988-01A-11R-1672-07 | C2 | 0.183850199  |
| TCGA-AK-3440-01A-02R-1277-07 | C1 | -0.004465539 |
| TCGA-AK-3453-01A-02R-1277-07 | C3 | -0.299126475 |
| TCGA-B0-5697-01A-11R-1541-07 | C2 | 0.186425254  |
| TCGA-B0-4841-01A-01R-1277-07 | C3 | 0.108067415  |
| TCGA-CJ-5679-01A-11R-1541-07 | C3 | 0.334415654  |
| TCGA-B0-4845-01A-01R-1277-07 | C3 | -0.389833215 |
| TCGA-CZ-5465-01A-01R-1503-07 | C1 | 0.220794646  |
| TCGA-CJ-5686-01A-11R-1672-07 | C2 | 0.447744689  |
| TCGA-BP-4345-01A-01R-1289-07 | C2 | -0.374615952 |
| TCGA-B0-5693-01A-11R-1541-07 | C2 | 0.00188592   |
| TCGA-B0-4838-01A-01R-1305-07 | C2 | -0.163307879 |
| TCGA-B8-5549-01A-01R-1541-07 | C1 | 0.413704014  |
| TCGA-CJ-4876-01A-01R-1305-07 | C3 | -0.136380459 |
| TCGA-BP-4337-01A-01R-1289-07 | C3 | -0.225940264 |
| TCGA-BP-4985-01A-01R-1334-07 | C2 | -0.025812346 |
| TCGA-A3-3374-01A-02R-1325-07 | C1 | 0.200516193  |
| TCGA-A3-3373-01A-02R-1420-07 | C2 | 0.22620149   |
| TCGA-B0-5700-01A-11R-1541-07 | C3 | 0.336399695  |
| TCGA-B4-5378-01A-01R-1503-07 | C3 | -0.318449913 |
| TCGA-B0-5709-01A-11R-1541-07 | C2 | 0.222327401  |
| TCGA-BP-4351-01A-01R-1289-07 | C3 | -0.339437377 |
| TCGA-BP-4774-01A-01R-1289-07 | C3 | -0.125164721 |
| TCGA-BP-4986-01A-01R-1334-07 | C2 | -0.432115996 |
| TCGA-B0-5113-01A-01R-1420-07 | C2 | -0.145181354 |
| TCGA-A3-A6NL-01A-11R-A33J-07 | C2 | -0.444086961 |
| TCGA-CJ-5680-01A-11R-1541-07 | C1 | 0.233749044  |
| TCGA-B0-5402-01A-01R-1503-07 | C1 | 0.198958358  |

|                              |    |              |
|------------------------------|----|--------------|
| TCGA-CZ-4862-01A-01R-1305-07 | C2 | -0.192434033 |
| TCGA-CW-6097-01A-11R-1672-07 | C2 | -0.053625918 |
| TCGA-B4-5843-01A-11R-1672-07 | C2 | 0.028459621  |
| TCGA-A3-3307-01A-01R-0864-07 | C1 | -0.128045746 |
| TCGA-B0-4688-01A-01R-1277-07 | C3 | -0.274235562 |
| TCGA-CJ-5689-01A-11R-1541-07 | C2 | 0.240085544  |
| TCGA-BP-4335-01A-01R-1289-07 | C3 | -0.288797792 |
| TCGA-CJ-4908-01A-01R-1426-07 | C2 | -0.386487133 |
| TCGA-CZ-5458-01A-01R-1503-07 | C2 | 0.158500812  |
| TCGA-B0-4690-01A-01R-1277-07 | C2 | -0.038772439 |
| TCGA-CJ-4900-01A-01R-1334-07 | C2 | -0.137063621 |
| TCGA-A3-3359-01A-01R-0864-07 | C2 | -0.216911408 |
| TCGA-CJ-4907-01A-01R-1426-07 | C2 | -0.181332446 |
| TCGA-CZ-5460-01A-01R-1503-07 | C1 | 0.350223106  |
| TCGA-B8-4622-01A-02R-1277-07 | C2 | -0.101390902 |
| TCGA-BP-4994-01A-01R-1334-07 | C1 | 0.08986531   |
| TCGA-B0-4703-01A-01R-1277-07 | C2 | -0.496747178 |
| TCGA-BP-4346-01A-01R-1289-07 | C2 | -0.402287667 |
| TCGA-B0-4839-01A-01R-1305-07 | C3 | 0.074445084  |
| TCGA-CZ-5985-01A-11R-1672-07 | C2 | 0.379293882  |
| TCGA-CZ-4865-01A-02R-1503-07 | C3 | 0.268575258  |
| TCGA-CJ-5675-01A-11R-1541-07 | C1 | 0.214439522  |
| TCGA-AK-3429-01A-02R-1325-07 | C1 | 0.00068707   |
| TCGA-B0-4843-01A-01R-1277-07 | C3 | -0.20926357  |
| TCGA-CJ-4886-01A-01R-1305-07 | C2 | -0.243541714 |
| TCGA-B0-5083-01A-02R-1420-07 | C3 | 0.171707797  |
| TCGA-B0-5117-01A-01R-1420-07 | C1 | -0.111167615 |
| TCGA-BP-4325-01A-02R-1289-07 | C2 | 0.04248184   |
| TCGA-CW-5580-01A-01R-1672-07 | C2 | 0.044245878  |
| TCGA-BP-5000-01A-01R-1334-07 | C3 | -0.080713774 |
| TCGA-B0-5106-01A-01R-1420-07 | C3 | -0.268121457 |
| TCGA-CJ-6031-01A-11R-1672-07 | C2 | 0.535281919  |
| TCGA-B0-4852-01A-01R-1503-07 | C2 | -0.223832775 |
| TCGA-B0-5690-01A-11R-1541-07 | C2 | -0.378396842 |
| TCGA-B0-4697-01A-01R-1277-07 | C3 | -0.492322534 |
| TCGA-CZ-4859-01A-02R-1426-07 | C1 | 0.311139902  |
| TCGA-BP-4789-01A-01R-1305-07 | C2 | -0.128111475 |
| TCGA-CZ-5989-01A-11R-1672-07 | C2 | 0.099446469  |
| TCGA-A3-3347-01A-02R-1325-07 | C2 | -0.153427009 |
| TCGA-B0-4827-01A-02R-1420-07 | C2 | 0.34693188   |
| TCGA-BP-4760-01A-02R-1420-07 | C3 | -0.254182213 |
| TCGA-CW-5581-01A-02R-1541-07 | C1 | 0.334949308  |
| TCGA-AK-3427-01A-01R-0864-07 | C1 | -0.078087091 |
| TCGA-AK-3445-01A-02R-1277-07 | C2 | -0.154002429 |
| TCGA-BP-4763-01A-01R-1289-07 | C1 | 0.196271602  |
| TCGA-BP-4776-01A-01R-1289-07 | C3 | -0.048146801 |
| TCGA-BP-5008-01A-01R-1334-07 | C2 | -0.036291886 |
| TCGA-B0-5119-01A-02R-1420-07 | C1 | 0.333684582  |
| TCGA-CJ-5684-01A-11R-1541-07 | C1 | -0.065976828 |

|                              |    |              |
|------------------------------|----|--------------|
| TCGA-BP-4338-01A-01R-1289-07 | C2 | 0.528251193  |
| TCGA-B0-5085-01A-01R-1334-07 | C3 | -0.020837411 |
| TCGA-A3-3380-01A-01R-0864-07 | C3 | -0.455979045 |
| TCGA-B0-4691-01A-01R-1277-07 | C3 | 0.137606499  |
| TCGA-B0-5695-01A-11R-1541-07 | C2 | 0.207336621  |
| TCGA-A3-3317-01A-02R-1325-07 | C2 | -0.347414042 |
| TCGA-CJ-5672-01A-11R-1541-07 | C3 | 0.224487278  |
| TCGA-CJ-5677-01A-11R-1541-07 | C3 | 0.442901022  |
| TCGA-A3-3367-01A-02R-1420-07 | C1 | 0.246406249  |
| TCGA-B8-A54K-01A-11R-A33J-07 | C3 | -0.504300751 |
| TCGA-BP-4992-01A-01R-1334-07 | C3 | -0.402708879 |
| TCGA-B0-5705-01A-11R-1541-07 | C2 | 0.421088068  |
| TCGA-CW-6088-01A-11R-1672-07 | C2 | 0.103102448  |
| TCGA-BP-4758-01A-01R-1289-07 | C3 | -0.183828201 |
| TCGA-BP-4355-01A-01R-1289-07 | C3 | -0.338614837 |
| TCGA-CZ-4866-01A-01R-1503-07 | C2 | 0.139548546  |
| TCGA-B8-4621-01A-01R-1503-07 | C2 | 0.363381447  |
| TCGA-BP-4995-01A-01R-1334-07 | C1 | 0.105499551  |
| TCGA-BP-5004-01A-01R-1334-07 | C2 | 0.111045924  |
| TCGA-B8-5162-01A-01R-1420-07 | C2 | -0.030683198 |
| TCGA-B0-4847-01A-01R-1277-07 | C3 | -0.276554767 |
| TCGA-BP-4769-01A-01R-1289-07 | C3 | -0.110942025 |
| TCGA-CZ-5982-01A-11R-1672-07 | C2 | 0.10000047   |
| TCGA-CJ-4870-01A-01R-1305-07 | C1 | 0.320303372  |
| TCGA-AK-3454-01A-02R-1277-07 | C3 | -0.349738384 |
| TCGA-BP-4975-01A-01R-1334-07 | C1 | 0.487749663  |
| TCGA-CW-5585-01A-01R-1541-07 | C1 | 0.100596565  |
| TCGA-B2-4098-01A-02R-1325-07 | C2 | 0.393984196  |
| TCGA-CJ-5678-01A-11R-1541-07 | C1 | 0.264697206  |
| TCGA-B0-5702-01A-11R-1541-07 | C3 | -0.014108204 |
| TCGA-CJ-4638-01A-02R-1325-07 | C3 | 0.172319289  |
| TCGA-DV-5573-01A-01R-1541-07 | C3 | -0.251045539 |
| TCGA-BP-5196-01A-01R-1426-07 | C2 | -0.087444856 |
| TCGA-A3-3351-01A-02R-1325-07 | C2 | -0.392537458 |
| TCGA-B8-A54D-01A-21R-A266-07 | C2 | -0.170092421 |
| TCGA-A3-3322-01A-02R-1325-07 | C2 | -0.107955909 |
| TCGA-B8-A54H-01A-11R-A33J-07 | C1 | -0.185737286 |
| TCGA-A3-A8OW-01A-11R-A37O-07 | C1 | -0.211639161 |
| TCGA-B0-4701-01A-01R-1277-07 | C2 | 0.041331792  |
| TCGA-B2-4101-01A-02R-1277-07 | C2 | -0.088360952 |
| TCGA-A3-3320-01A-02R-1325-07 | C2 | 0.093302908  |
| TCGA-BP-4999-01A-01R-1334-07 | C2 | -0.37118013  |
| TCGA-BP-4161-01A-02R-1325-07 | C2 | 0.075540153  |
| TCGA-B8-4143-01A-01R-1188-07 | C2 | -0.456472748 |
| TCGA-B0-5701-01A-11R-1541-07 | C3 | -0.00084792  |
| TCGA-BP-4797-01A-01R-1305-07 | C2 | 0.542391883  |
| TCGA-DV-A4W0-05A-11R-A266-07 | C3 | -0.563231743 |
| TCGA-BP-4174-01A-02R-1289-07 | C2 | 0.424857652  |
| TCGA-A3-3385-01A-02R-1420-07 | C2 | -0.048148638 |

|                              |    |              |
|------------------------------|----|--------------|
| TCGA-CZ-5469-01A-01R-1503-07 | C3 | -0.257380695 |
| TCGA-BP-4970-01A-01R-1334-07 | C2 | -0.15082798  |
| TCGA-BP-4330-01A-01R-1289-07 | C2 | -0.374446081 |
| TCGA-BP-4349-01A-01R-1289-07 | C2 | 0.124908753  |
| TCGA-AK-3461-01A-02R-1277-07 | C2 | -0.19692783  |
| TCGA-A3-3383-01A-02R-1325-07 | C3 | 0.031445644  |
| TCGA-BP-4159-01A-02R-1289-07 | C3 | 0.046440839  |
| TCGA-B2-5635-01B-04R-A277-07 | C2 | -0.175467561 |
| TCGA-CJ-4889-01A-01R-1305-07 | C2 | -0.147074834 |
| TCGA-BP-4962-01A-01R-1334-07 | C2 | 0.407692891  |
| TCGA-CJ-5682-01A-11R-1541-07 | C2 | 0.103223158  |
| TCGA-BP-4347-01A-01R-1289-07 | C2 | -0.35312798  |
| TCGA-BP-5186-01A-01R-1426-07 | C2 | 0.096889604  |
| TCGA-CZ-4856-01A-02R-1426-07 | C3 | 0.428142136  |
| TCGA-B0-4824-01A-01R-1277-07 | C3 | -0.265523122 |
| TCGA-A3-3376-01A-02R-1420-07 | C2 | -0.500501753 |
| TCGA-CJ-4635-01A-02R-1305-07 | C2 | -0.286136786 |
| TCGA-BP-5183-01A-01R-1426-07 | C1 | -0.41158061  |
| TCGA-A3-A8OV-01A-11R-A37O-07 | C1 | 0.196342855  |
| TCGA-B8-5159-01A-01R-1420-07 | C1 | 0.188631007  |
| TCGA-B8-5163-01A-01R-1420-07 | C2 | -0.075430561 |
| TCGA-CZ-5461-01A-01R-1503-07 | C2 | 0.058365721  |
| TCGA-GK-A6C7-01A-11R-A33J-07 | C2 | -0.243500309 |
| TCGA-BP-4771-01A-01R-1289-07 | C2 | -0.370685944 |
| TCGA-BP-4803-01A-01R-1305-07 | C2 | 0.154686367  |
| TCGA-B2-5639-01A-01R-1541-07 | C1 | 0.391620693  |
| TCGA-CZ-5455-01A-01R-1503-07 | C2 | -0.060146215 |
| TCGA-CJ-4897-01A-03R-1426-07 | C2 | 0.088105102  |
| TCGA-B0-5107-01A-01R-1420-07 | C3 | 0.011521955  |
| TCGA-BP-4759-01A-01R-1289-07 | C3 | -0.14224324  |
| TCGA-B0-4836-01A-01R-1305-07 | C2 | -0.141550014 |
| TCGA-B8-A7U6-01A-12R-A37O-07 | C1 | 0.048930234  |
| TCGA-B2-5636-01A-02R-1541-07 | C3 | -0.305518602 |
| TCGA-A3-3382-01A-02R-1325-07 | C2 | 0.158114622  |
| TCGA-CZ-5464-01A-01R-1503-07 | C1 | 0.251537395  |
| TCGA-CJ-4634-01A-02R-1325-07 | C2 | 0.217376821  |
| TCGA-CJ-6028-01A-11R-1672-07 | C2 | 0.138735429  |
| TCGA-BP-4804-01A-02R-1305-07 | C2 | -0.32581532  |
| TCGA-CJ-4912-01A-01R-1426-07 | C3 | -0.159892416 |
| TCGA-CJ-4873-01A-01R-1305-07 | C3 | -0.260438346 |
| TCGA-CJ-4894-01A-01R-1305-07 | C2 | -0.310387913 |
| TCGA-CW-5588-01A-01R-1541-07 | C2 | 0.397711657  |
| TCGA-A3-3325-01A-01R-0864-07 | C2 | -0.342351441 |
| TCGA-CJ-4871-01A-01R-1305-07 | C2 | 0.231065849  |
| TCGA-CJ-4640-01A-02R-1325-07 | C1 | 0.329047928  |
| TCGA-BP-4762-01A-02R-1289-07 | C2 | 0.174101905  |
| TCGA-B0-5094-01A-01R-1420-07 | C2 | -0.050956555 |
| TCGA-CZ-5467-01A-01R-1503-07 | C2 | 0.271333374  |
| TCGA-A3-3363-01A-01R-0864-07 | C1 | -0.262153881 |

|                              |    |              |
|------------------------------|----|--------------|
| TCGA-CZ-5468-01A-01R-1503-07 | C3 | -0.008849183 |
| TCGA-B2-3924-01B-03R-A277-07 | C2 | -0.391729485 |
| TCGA-BP-5181-01A-01R-1426-07 | C1 | 0.262064279  |
| TCGA-B8-5553-01A-01R-1541-07 | C2 | 0.064135375  |
| TCGA-BP-4761-01A-01R-1289-07 | C3 | 0.221363239  |
| TCGA-B2-5633-01A-01R-A277-07 | C1 | -0.248447588 |
| TCGA-A3-3358-01A-01R-1541-07 | C2 | 0.221038811  |
| TCGA-CZ-4864-01A-01R-1503-07 | C1 | -0.290867314 |
| TCGA-AK-3436-01A-02R-1325-07 | C3 | -0.013765975 |
| TCGA-CZ-5466-01A-01R-1503-07 | C2 | 0.197033223  |
| TCGA-B0-5080-01A-01R-1503-07 | C2 | -0.107302421 |
| TCGA-CZ-4861-01A-01R-1305-07 | C2 | 0.337713123  |
| TCGA-CJ-5671-01A-11R-1541-07 | C2 | 0.205229526  |
| TCGA-AK-3431-01A-02R-1277-07 | C3 | 0.005786279  |
| TCGA-B0-4811-01A-01R-1503-07 | C3 | -0.37009057  |
| TCGA-A3-3313-01A-02R-1325-07 | C1 | 0.089178535  |
| TCGA-B8-5552-01B-11R-1672-07 | C2 | 0.176050295  |
| TCGA-CJ-6027-01A-11R-1672-07 | C3 | -0.17622167  |
| TCGA-BP-4756-01A-01R-1289-07 | C1 | -0.132837421 |
| TCGA-A3-3319-01A-02R-1325-07 | C2 | 0.398985678  |
| TCGA-MW-A4EC-01A-11R-A266-07 | C2 | 0.01946516   |
| TCGA-B0-4816-01A-01R-1503-07 | C2 | 0.113958723  |
| TCGA-CZ-4863-01A-01R-1503-07 | C2 | 0.125276335  |
| TCGA-B0-5110-01A-01R-1420-07 | C2 | -0.167443804 |
| TCGA-CZ-5986-01A-11R-1672-07 | C2 | 0.124165553  |
| TCGA-B0-4828-01A-01R-1277-07 | C1 | -0.104107622 |
| TCGA-B8-4151-01A-01R-1188-07 | C1 | 0.293538586  |
| TCGA-EU-5905-01A-11R-1672-07 | C3 | -0.306973808 |
| TCGA-CJ-4903-01A-01R-1426-07 | C2 | 0.150681239  |
| TCGA-B0-5698-01A-11R-1672-07 | C2 | 0.365255964  |
| TCGA-B0-4815-01A-01R-1503-07 | C2 | -0.084120128 |
| TCGA-B0-5081-01A-01R-1334-07 | C3 | -0.310989134 |
| TCGA-A3-3352-01A-01R-0864-07 | C1 | -0.210934275 |
| TCGA-A3-A6NJ-01A-12R-A33J-07 | C2 | -0.054208677 |
| TCGA-BP-5184-01A-01R-1426-07 | C2 | 0.308561367  |
| TCGA-CJ-4899-01A-01R-1334-07 | C2 | -0.284928765 |
| TCGA-CJ-4881-01A-01R-1305-07 | C2 | 0.219606569  |
| TCGA-CJ-4878-01A-01R-1305-07 | C2 | -0.102169712 |
| TCGA-B0-4819-01A-01R-1277-07 | C3 | -0.383191732 |
| TCGA-B0-4710-01A-01R-1503-07 | C2 | -0.346636597 |
| TCGA-A3-3331-01A-02R-1325-07 | C2 | 0.163809575  |
| TCGA-BP-5174-01A-01R-1426-07 | C3 | 0.333911464  |
| TCGA-B0-5694-01A-11R-1541-07 | C1 | 0.212888962  |
| TCGA-B0-5116-01A-02R-1420-07 | C1 | 0.300547868  |
| TCGA-DV-5567-01A-01R-1541-07 | C3 | -0.375874679 |
| TCGA-BP-5169-01A-01R-1426-07 | C3 | -0.058312315 |
| TCGA-B0-4700-01A-02R-1541-07 | C3 | -0.100544359 |
| TCGA-AK-3433-01A-02R-1277-07 | C1 | -0.08042821  |
| TCGA-CJ-4875-01A-01R-1305-07 | C3 | -0.344435563 |



|                              |    |              |
|------------------------------|----|--------------|
| TCGA-A3-3335-01A-01R-0864-07 | C1 | 0.242014232  |
| TCGA-B0-5115-01A-01R-1420-07 | C2 | -0.242637875 |
| TCGA-BP-5195-01A-02R-1426-07 | C2 | 0.203625362  |
| TCGA-BP-4354-01A-02R-1289-07 | C2 | -0.248686912 |
| TCGA-BP-4974-01A-01R-1334-07 | C3 | -0.486998742 |
| TCGA-CJ-4641-01A-02R-1325-07 | C2 | 0.232866652  |
| TCGA-B4-5834-01A-11R-1672-07 | C2 | -0.020938386 |
| TCGA-BP-4169-01A-02R-1289-07 | C2 | -0.112038893 |
| TCGA-B2-5633-01B-04R-A277-07 | C2 | -0.394831993 |
| TCGA-BP-4777-01A-01R-1289-07 | C2 | 0.114821819  |
| TCGA-B0-5399-01A-01R-1503-07 | C1 | -0.019126681 |
| TCGA-B0-5099-01A-01R-1420-07 | C3 | 0.07862534   |
| TCGA-BP-4166-01A-02R-1289-07 | C3 | 0.08059884   |
| TCGA-CJ-4890-01A-01R-1305-07 | C2 | 0.032808498  |
| TCGA-B0-5084-01A-01R-1334-07 | C3 | -0.308383224 |
| TCGA-BP-5168-01A-01R-1420-07 | C3 | 0.257181664  |
| TCGA-BP-4770-01A-01R-1503-07 | C3 | -0.444553388 |
| TCGA-BP-4332-01A-01R-1289-07 | C2 | -0.212297238 |
| TCGA-B4-5832-01A-11R-1672-07 | C2 | 0.33259166   |
| TCGA-B0-4849-01A-01R-1277-07 | C3 | -0.4188743   |
| TCGA-B8-5164-01A-01R-1420-07 | C2 | 0.20615725   |
| TCGA-CW-6093-01A-11R-1672-07 | C2 | -0.183158865 |
| TCGA-MM-A84U-01A-11R-A37O-07 | C3 | 0.083087818  |
| TCGA-CJ-4637-01A-02R-1325-07 | C2 | -0.425839047 |
| TCGA-CJ-4642-01B-01R-1305-07 | C3 | -0.357642522 |
| TCGA-BP-5178-01A-01R-1426-07 | C2 | 0.462251975  |
| TCGA-BP-4790-01A-01R-1305-07 | C2 | -0.099606253 |
| TCGA-B0-5692-01A-11R-1541-07 | C1 | 0.135782161  |
| TCGA-CJ-4885-01A-01R-1305-07 | C2 | 0.342877178  |
| TCGA-BP-4768-01A-01R-1289-07 | C2 | -0.097740489 |
| TCGA-B0-5713-01A-11R-1672-07 | C1 | 0.132240136  |
| TCGA-CW-5587-01A-01R-1541-07 | C2 | 0.168728951  |
| TCGA-BP-5201-01A-01R-1426-07 | C3 | -0.213980001 |
| TCGA-CW-5590-01A-01R-1541-07 | C2 | 0.052207827  |
| TCGA-A3-3370-01A-02R-1420-07 | C2 | -0.361445824 |
| TCGA-B0-4848-01A-01R-1277-07 | C2 | 0.235056204  |
| TCGA-B0-4698-01A-01R-1503-07 | C3 | -0.394849534 |
| TCGA-BP-4982-01A-01R-1334-07 | C2 | -0.084477545 |
| TCGA-CJ-4636-01A-02R-1325-07 | C2 | 0.17042887   |
| TCGA-AK-3455-01A-01R-0864-07 | C1 | -0.035189552 |
| TCGA-A3-A6NN-01A-12R-A33J-07 | C2 | -0.249836494 |
| TCGA-G6-A8L6-01A-11R-A37O-07 | C3 | -0.243917635 |
| TCGA-B0-5703-01A-11R-1541-07 | C1 | 0.270609972  |
| TCGA-BP-4176-01A-02R-1289-07 | C2 | 0.188217657  |
| TCGA-B0-4707-01A-01R-1277-07 | C2 | 0.165073173  |
| TCGA-CW-5591-01A-01R-1541-07 | C2 | 0.402228414  |
| TCGA-B4-5838-01A-11R-1672-07 | C2 | 0.366903483  |
| TCGA-BP-4775-01A-01R-1289-07 | C2 | -0.203858495 |
| TCGA-BP-4158-01A-02R-1289-07 | C3 | -0.425941105 |

|                              |    |              |
|------------------------------|----|--------------|
| TCGA-CJ-5676-01A-11R-1541-07 | C3 | 0.30902507   |
| TCGA-DV-5565-01A-01R-1541-07 | C2 | -0.146438965 |
| TCGA-BP-4163-01A-02R-1325-07 | C2 | 0.293034616  |
| TCGA-BP-4327-01A-01R-1289-07 | C3 | -0.338386843 |
| TCGA-BP-5182-01A-01R-1426-07 | C2 | 0.346651076  |
| TCGA-CJ-4884-01A-01R-1305-07 | C2 | 0.14978034   |
| TCGA-CZ-5459-01A-01R-1503-07 | C2 | 0.389677633  |
| TCGA-B0-5096-01A-01R-1420-07 | C2 | -0.013857699 |
| TCGA-B8-A54J-01A-11R-A33J-07 | C2 | -0.272838453 |
| TCGA-BP-4987-01A-01R-1334-07 | C2 | -0.301442818 |
| TCGA-B2-5641-01A-01R-1541-07 | C2 | 0.158082123  |
| TCGA-AK-3426-01A-02R-1325-07 | C3 | -0.36258411  |
| TCGA-B4-5377-01A-01R-1503-07 | C1 | 0.12975563   |
| TCGA-BP-4342-01A-01R-1289-07 | C1 | -0.056983311 |
| TCGA-BP-4983-01A-01R-1334-07 | C2 | -0.251538187 |
| TCGA-B0-4833-01A-01R-1305-07 | C3 | -0.441430615 |
| TCGA-AS-3777-01A-01R-0864-07 | C3 | 0.297724492  |
| TCGA-CJ-4874-01A-01R-1305-07 | C1 | 0.296270866  |
| TCGA-CJ-4887-01A-01R-1305-07 | C3 | -0.019451492 |
| TCGA-AK-3428-01A-02R-1277-07 | C1 | 0.466742645  |
| TCGA-B8-A54F-01A-11R-A266-07 | C2 | 0.11908097   |
| TCGA-BP-5187-01A-01R-1426-07 | C2 | 0.293563378  |
| TCGA-CJ-5681-01A-11R-1541-07 | C1 | 0.021892691  |
| TCGA-B0-4696-01A-01R-1277-07 | C3 | -0.319621113 |
| TCGA-B0-5710-01A-11R-1672-07 | C2 | -0.071643759 |
| TCGA-BP-5175-01A-01R-1426-07 | C3 | 0.170282803  |
| TCGA-DV-5569-01A-01R-1541-07 | C2 | 0.116205441  |
| TCGA-BP-5189-01A-02R-1426-07 | C2 | 0.23767272   |
| TCGA-AK-3443-01A-02R-1325-07 | C1 | -0.173484092 |
| TCGA-CW-5589-01A-01R-1541-07 | C2 | 0.376295834  |
| TCGA-B0-5109-01A-02R-1420-07 | C2 | -0.402683451 |
| TCGA-B8-A8YJ-01A-13R-A39I-07 | C2 | -0.107577925 |
| TCGA-B0-4810-01A-01R-1503-07 | C3 | -0.330966135 |
| TCGA-BP-5001-01A-01R-1334-07 | C3 | -0.175920029 |
| TCGA-EU-5906-01A-11R-1672-07 | C2 | 0.255290666  |
| TCGA-BP-4993-01A-02R-1420-07 | C2 | -0.137620549 |
| TCGA-B0-4823-01A-02R-1420-07 | C2 | 0.355173709  |
| TCGA-DV-5576-01A-01R-1541-07 | C3 | -0.341083733 |
| TCGA-MM-A563-01A-11R-A266-07 | C3 | -0.247655006 |
| TCGA-BP-5192-01A-01R-1426-07 | C1 | 0.056593605  |
| TCGA-CJ-4868-01A-01R-1305-07 | C2 | -0.194187031 |
| TCGA-A3-A8OU-01A-11R-A37O-07 | C2 | -0.171166195 |
| TCGA-B0-4718-01A-01R-1277-07 | C3 | -0.304990632 |
| TCGA-DV-5568-01A-01R-1541-07 | C3 | -0.09206857  |
| TCGA-AK-3456-01A-02R-1325-07 | C2 | 0.327887437  |
| TCGA-B0-4837-01A-01R-1305-07 | C2 | 0.464654609  |
| TCGA-B0-4694-01A-01R-1277-07 | C3 | 0.22207015   |
| TCGA-BP-4334-01A-01R-1289-07 | C1 | -0.268958819 |
| TCGA-B8-4146-01B-11R-1672-07 | C2 | 0.298872144  |

|                              |    |              |
|------------------------------|----|--------------|
| TCGA-CZ-4854-01A-01R-1305-07 | C2 | -0.144865733 |
| TCGA-DV-5575-01A-01R-1541-07 | C2 | 0.160757483  |



**Table S8: Univariate Cox regression for hazard ratio of 32 oxidative stress genes**

| id     | HR          | HR.95L      | HR.95H      | pvalue      |
|--------|-------------|-------------|-------------|-------------|
| CAT    | 0.981559106 | 0.974096941 | 0.989078436 | 1.75E-06    |
| MT1X   | 1.003163628 | 1.001681642 | 1.004647808 | 2.82E-05    |
| NFKB1  | 0.918321975 | 0.881017452 | 0.957206066 | 5.65E-05    |
| TXNRD1 | 1.022932228 | 1.010786735 | 1.035223659 | 0.000198822 |
| NQO1   | 1.01606743  | 1.007393638 | 1.024815904 | 0.000268403 |
| NOX1   | 3.83524286  | 1.713516183 | 8.584154581 | 0.001075206 |
| GCLC   | 0.863130022 | 0.788274594 | 0.945093805 | 0.001472692 |
| SOD2   | 1.002887455 | 1.001041608 | 1.004736707 | 0.002158121 |
| MAPK10 | 0.717608306 | 0.569266558 | 0.904605537 | 0.004977359 |
| NFE2L2 | 0.971996264 | 0.951134787 | 0.993315301 | 0.010291858 |
| HMOX1  | 0.997403844 | 0.995268355 | 0.999543914 | 0.017448224 |
| MGST1  | 1.0115201   | 1.00143695  | 1.021704775 | 0.0250336   |
| GSTT2  | 2.849093772 | 0.940629648 | 8.62968262  | 0.064066615 |
| NFIX   | 0.97532318  | 0.948615798 | 1.002782483 | 0.077762613 |
| GPX1   | 1.000837644 | 0.999860881 | 1.001815361 | 0.092822657 |
| FOS    | 0.999030576 | 0.99786839  | 1.000194116 | 0.102440157 |
| SP1    | 0.978090025 | 0.952109796 | 1.004779177 | 0.10677648  |
| NOX4   | 0.973577043 | 0.939818315 | 1.008548399 | 0.136956943 |
| GSR    | 0.99110046  | 0.977648541 | 1.00473747  | 0.199804636 |
| CYBB   | 1.005187656 | 0.996788954 | 1.013657123 | 0.22678778  |
| CYP1A1 | 0.702030494 | 0.378128015 | 1.303386143 | 0.262438604 |
| GPX3   | 1.000117013 | 0.999907943 | 1.000326128 | 0.272681824 |
| TXN2   | 0.99297428  | 0.980078983 | 1.006039246 | 0.290439046 |
| SOD1   | 1.002007614 | 0.997287432 | 1.006750138 | 0.40513128  |
| MAOA   | 0.99625026  | 0.986796914 | 1.005794167 | 0.439944166 |
| SOD3   | 0.996223758 | 0.985484502 | 1.007080045 | 0.493871377 |
| MAPK14 | 0.984190705 | 0.931192086 | 1.040205729 | 0.572588445 |
| NOX3   | 0.533037206 | 0.037134818 | 7.651273916 | 0.643447746 |
| TXNRD2 | 0.976768826 | 0.863571394 | 1.104804243 | 0.708388493 |
| UGT1A6 | 1.001802717 | 0.990127272 | 1.013615838 | 0.763317417 |
| XDH    | 1.012097146 | 0.87186029  | 1.174890798 | 0.874446746 |
| JUNB   | 0.999896414 | 0.998261934 | 1.001533569 | 0.901231196 |
| NOX5   | 0.979143371 | 0.688590061 | 1.392296802 | 0.906583595 |

**Table S9: Lasso regression coefficients of 9 selected genes**

| Gene   | Coef         |
|--------|--------------|
| CAT    | -0.009160543 |
| MT1X   | 0.001344262  |
| NFKB1  | -0.035375003 |
| TXNRD1 | 0.013734239  |
| NOX1   | 0.298518736  |
| GCLC   | -0.020526275 |
| SOD2   | 0.002072399  |
| MAPK10 | -0.015777878 |
| HMOX1  | -0.0024321   |

**Table S10: Information of GSEA in GO database**

| ONTOLOGY | ID         | Description       | setSize | enrichmentScore | NES          |
|----------|------------|-------------------|---------|-----------------|--------------|
| MF       | GO:0002162 | dystroglycan bi   | 10      | 0.858130588     | 1.615937779  |
| CC       | GO:0042571 | immunoglobulin    | 61      | 0.743914921     | 1.708087774  |
| CC       | GO:0019814 | immunoglobulin    | 142     | 0.736489005     | 1.757291654  |
| MF       | GO:0034987 | immunoglobulin    | 65      | 0.734812909     | 1.690761695  |
| BP       | GO:0006910 | phagocytosis, re  | 73      | 0.704009799     | 1.634868452  |
| MF       | GO:0003823 | antigen binding   | 147     | 0.662754731     | 1.582016398  |
| MF       | GO:0005549 | odorant binding   | 98      | 0.651442675     | 1.534151528  |
| BP       | GO:0002433 | immune respons    | 138     | 0.639279021     | 1.524228984  |
| BP       | GO:0038096 | Fc-gamma recep    | 138     | 0.639279021     | 1.524228984  |
| BP       | GO:0006958 | complement acti   | 126     | 0.638742155     | 1.517034609  |
| BP       | GO:0002431 | Fc receptor med   | 144     | 0.631947744     | 1.509259321  |
| BP       | GO:0006911 | phagocytosis, er  | 107     | 0.631590969     | 1.492661746  |
| BP       | GO:0038094 | Fc-gamma recep    | 141     | 0.626940146     | 1.494359358  |
| BP       | GO:0099024 | plasma membra     | 116     | 0.618680454     | 1.468597888  |
| BP       | GO:0050871 | positive regulati | 131     | 0.613531235     | 1.458670383  |
| BP       | GO:0002455 | humoral immun     | 139     | 0.612676789     | 1.460587444  |
| BP       | GO:0050853 | B cell receptor s | 114     | 0.609233633     | 1.444653058  |
| BP       | GO:0038095 | Fc-epsilon recep  | 167     | 0.608145404     | 1.457762731  |
| BP       | GO:0010324 | membrane invag    | 124     | 0.606929229     | 1.443132791  |
| MF       | GO:0004984 | olfactory recept  | 419     | 0.598295022     | 1.466417825  |
| BP       | GO:0050911 | detection of che  | 419     | 0.598295022     | 1.466417825  |
| BP       | GO:0070268 | cornification     | 112     | 0.594874111     | 1.409490279  |
| BP       | GO:0002377 | immunoglobulin    | 192     | 0.584811758     | 1.409797444  |
| BP       | GO:0007608 | sensory percepti  | 446     | 0.583518962     | 1.429814984  |
| BP       | GO:0050907 | detection of che  | 468     | 0.573793857     | 1.407061157  |
| BP       | GO:0050864 | regulation of B c | 173     | 0.562846881     | 1.350619302  |
| BP       | GO:0031424 | keratinization    | 223     | 0.559649061     | 1.355501547  |
| BP       | GO:0016064 | immunoglobulin    | 207     | 0.5568685       | 1.34587794   |
| BP       | GO:0019724 | B cell mediated   | 210     | 0.552236706     | 1.334532352  |
| BP       | GO:0008037 | cell recognition  | 204     | 0.549081473     | 1.325358789  |
| BP       | GO:0030216 | keratinocyte dif  | 301     | 0.5287161       | 1.289231888  |
| BP       | GO:0038093 | Fc receptor sign  | 239     | 0.528564369     | 1.283159053  |
| BP       | GO:0009913 | epidermal cell d  | 354     | 0.506221159     | 1.237393265  |
| BP       | GO:0030073 | insulin secretion | 206     | -0.299858046    | -1.0705521   |
| BP       | GO:0009743 | response to carb  | 227     | -0.305559733    | -1.181291825 |
| BP       | GO:0031669 | cellular respons  | 235     | -0.307879207    | -1.234978142 |
| BP       | GO:0045017 | glycerolipid bio  | 249     | -0.310337081    | -1.306060975 |
| BP       | GO:0051650 | establishment of  | 183     | -0.313979705    | -1.237440343 |
| BP       | GO:0009746 | response to hexo  | 199     | -0.314890811    | -1.091219328 |
| BP       | GO:0034284 | response to mon   | 204     | -0.315432433    | -1.114910548 |
| BP       | GO:0050796 | regulation of ins | 175     | -0.324345447    | -1.091930293 |
| BP       | GO:0009749 | response to gluc  | 194     | -0.325634096    | -1.116383759 |
| BP       | GO:0006814 | sodium ion tran   | 218     | -0.326230709    | -1.221406577 |
| CC       | GO:0031968 | organelle outer   | 198     | -0.32755002     | -1.134017127 |

|    |            |                    |     |              |              |
|----|------------|--------------------|-----|--------------|--------------|
| BP | GO:0009408 | response to heat   | 172 | -0.327629487 | -1.10074027  |
| CC | GO:0019867 | outer membrane     | 200 | -0.327948133 | -1.138205876 |
| BP | GO:0010565 | regulation of cel  | 179 | -0.328864243 | -1.137680577 |
| CC | GO:0005681 | spliceosomal co    | 185 | -0.329597574 | -1.121139098 |
| BP | GO:0006839 | mitochondrial tr   | 248 | -0.331416738 | -1.393172602 |
| BP | GO:0045732 | positive regulati  | 213 | -0.332926325 | -1.231410708 |
| MF | GO:1901681 | sulfur compoun     | 242 | -0.333354995 | -1.358716809 |
| MF | GO:0043177 | organic acid bin   | 201 | -0.335193286 | -1.165809815 |
| BP | GO:0140053 | mitochondrial g    | 159 | -0.3355921   | -1.215441782 |
| MF | GO:0016747 | transferase activ  | 226 | -0.338713718 | -1.307039023 |
| BP | GO:0009132 | nucleoside diph    | 153 | -0.338817391 | -1.235720889 |
| MF | GO:0035091 | phosphatidyli      | 241 | -0.338896754 | -1.379415863 |
| BP | GO:0042133 | neurotransmitter   | 151 | -0.340640494 | -1.224660505 |
| BP | GO:0097237 | cellular respons   | 237 | -0.341434049 | -1.384545363 |
| BP | GO:0002262 | myeloid cell hor   | 147 | -0.342493557 | -1.116921993 |
| BP | GO:0042445 | hormone metabo     | 232 | -0.34315673  | -1.351773837 |
| CC | GO:0043296 | apical junction c  | 143 | -0.343337199 | -1.082734835 |
| MF | GO:0008201 | heparin binding    | 162 | -0.346114421 | -1.258891663 |
| BP | GO:0008033 | tRNA processing    | 126 | -0.346305088 | -1.252527926 |
| BP | GO:0006575 | cellular modifie   | 186 | -0.347899749 | -1.331139684 |
| MF | GO:0016829 | lyase activity     | 186 | -0.349706613 | -1.338053136 |
| BP | GO:0042157 | lipoprotein meta   | 130 | -0.353214024 | -1.250524154 |
| CC | GO:0005923 | bicellular tight j | 123 | -0.354283667 | -1.302933396 |
| BP | GO:0019751 | polyol metabolic   | 124 | -0.354734689 | -1.234513815 |
| CC | GO:0070160 | tight junction     | 128 | -0.356097754 | -1.248724898 |
| BP | GO:0055067 | monovalent ino     | 154 | -0.358409059 | -1.278262145 |
| BP | GO:0016482 | cytosolic transp   | 157 | -0.359531324 | -1.298261158 |
| BP | GO:0042180 | cellular ketone r  | 245 | -0.360240521 | -1.498794142 |
| BP | GO:0006399 | tRNA metabolic     | 165 | -0.361088111 | -1.334771109 |
| BP | GO:0006661 | phosphatidyli      | 116 | -0.3612793   | -1.188199685 |
| BP | GO:0007584 | response to nutr   | 218 | -0.361279495 | -1.3526291   |
| BP | GO:0046031 | ADP metabolic j    | 121 | -0.362418782 | -1.245707184 |
| BP | GO:0000041 | transition metal   | 123 | -0.363132227 | -1.335475354 |
| BP | GO:0006888 | endoplasmic reti   | 212 | -0.36326736  | -1.342306736 |
| MF | GO:0005506 | iron ion binding   | 152 | -0.363584887 | -1.308195078 |
| BP | GO:0009185 | ribonucleoside c   | 135 | -0.36455993  | -1.319368615 |
| BP | GO:0046890 | regulation of lip  | 195 | -0.36508066  | -1.253579672 |
| BP | GO:0098754 | detoxification     | 134 | -0.366832621 | -1.321771255 |
| MF | GO:0015081 | sodium ion tran    | 150 | -0.367544556 | -1.320263165 |
| BP | GO:0009135 | purine nucleosic   | 133 | -0.367748874 | -1.329072474 |
| BP | GO:0009179 | purine ribonuck    | 133 | -0.367748874 | -1.329072474 |
| BP | GO:0034754 | cellular hormon    | 129 | -0.37069332  | -1.305860001 |
| CC | GO:0005741 | mitochondrial o    | 175 | -0.371177427 | -1.249593235 |
| MF | GO:0019842 | vitamin binding    | 136 | -0.371756703 | -1.172564422 |
| BP | GO:0007586 | digestion          | 138 | -0.372717605 | -1.158993762 |
| MF | GO:0016651 | oxidoreductase ;   | 100 | -0.376179037 | -1.35379787  |



|    |            |                    |     |              |              |
|----|------------|--------------------|-----|--------------|--------------|
| BP | GO:1903034 | regulation of res  | 171 | -0.377107673 | -1.26040315  |
| BP | GO:0032091 | negative regulat   | 101 | -0.380777544 | -1.376804187 |
| MF | GO:0016874 | ligase activity    | 124 | -0.380939226 | -1.325708343 |
| BP | GO:0016241 | regulation of mæ   | 170 | -0.382034371 | -1.275820331 |
| CC | GO:0030134 | COPII-coated E     | 91  | -0.382145576 | -1.461381032 |
| BP | GO:0015718 | monocarboxylic     | 162 | -0.38461928  | -1.398942012 |
| BP | GO:0042594 | response to starv  | 188 | -0.386255806 | -1.490569074 |
| BP | GO:0003014 | renal system pro   | 120 | -0.389837031 | -1.263305253 |
| BP | GO:0034101 | erythrocyte hom    | 122 | -0.392086455 | -1.351645657 |
| BP | GO:0048259 | regulation of rec  | 99  | -0.394037647 | -1.511980484 |
| BP | GO:0050810 | regulation of ste  | 95  | -0.394081168 | -1.426370414 |
| BP | GO:0033559 | unsaturated fatty  | 109 | -0.395354506 | -1.250702588 |
| MF | GO:0051087 | chaperone bindi    | 101 | -0.396030805 | -1.431956477 |
| BP | GO:0030218 | erythrocyte diffi  | 114 | -0.398435532 | -1.306629405 |
| BP | GO:0045834 | positive regulati  | 143 | -0.400952943 | -1.264429604 |
| MF | GO:0140101 | catalytic activity | 102 | -0.401072607 | -1.407554981 |
| BP | GO:1901655 | cellular respons   | 93  | -0.40114107  | -1.445716323 |
| BP | GO:0019217 | regulation of fat  | 96  | -0.402145314 | -1.495447987 |
| MF | GO:0008135 | translation facto  | 85  | -0.402765435 | -1.49873383  |
| MF | GO:0016705 | oxidoreductase ;   | 159 | -0.403273039 | -1.46056746  |
| BP | GO:0016052 | carbohydrate ca    | 197 | -0.404304061 | -1.396530156 |
| MF | GO:0031072 | heat shock prote   | 119 | -0.406584405 | -1.316078938 |
| BP | GO:0003073 | regulation of sy:  | 91  | -0.406679869 | -1.555203787 |
| BP | GO:0015748 | organophosphat     | 119 | -0.407320583 | -1.318461884 |
| MF | GO:0016209 | antioxidant activ  | 84  | -0.407531973 | -1.506727581 |
| BP | GO:0097581 | lamellipodium c    | 80  | -0.407550031 | -1.456702578 |
| MF | GO:0043178 | alcohol binding    | 85  | -0.408407189 | -1.519727408 |
| BP | GO:0032368 | regulation of lip  | 118 | -0.40990222  | -1.324523519 |
| BP | GO:0006720 | isoprenoid meta    | 138 | -0.410549175 | -1.276633908 |
| BP | GO:0045333 | cellular respirati | 183 | -0.410639661 | -1.61839149  |
| BP | GO:0098876 | vesicle-mediatec   | 96  | -0.41094226  | -1.528160975 |
| BP | GO:0001523 | retinoid metabo    | 104 | -0.411441428 | -1.430862232 |
| BP | GO:1990542 | mitochondrial tr   | 90  | -0.411937743 | -1.560738239 |
| CC | GO:0098862 | cluster of actin-f | 150 | -0.412107002 | -1.480336698 |
| MF | GO:0016410 | N-acyltransferas   | 107 | -0.414285951 | -1.44167655  |
| BP | GO:0006826 | iron ion transpo   | 76  | -0.416757229 | -1.452495318 |
| BP | GO:0097327 | response to antit  | 96  | -0.417152371 | -1.551254367 |
| CC | GO:0072562 | blood micropart    | 144 | -0.419503219 | -1.346878244 |
| BP | GO:1903035 | negative regulat   | 89  | -0.419769946 | -1.582977382 |
| BP | GO:0061041 | regulation of wc   | 141 | -0.422765635 | -1.32592752  |
| BP | GO:0006721 | terpenoid metab    | 120 | -0.423529963 | -1.372490514 |
| BP | GO:0098869 | cellular oxidant   | 99  | -0.423730949 | -1.625918055 |
| BP | GO:0016101 | diterpenoid met:   | 110 | -0.423963652 | -1.353266531 |
| MF | GO:0030165 | PDZ domain bir     | 86  | -0.425295475 | -1.595851196 |
| CC | GO:0016234 | inclusion body     | 82  | -0.427201197 | -1.489832664 |
| MF | GO:0015399 | primary active tr  | 111 | -0.428260709 | -1.370896215 |

|    |            |                    |     |              |              |
|----|------------|--------------------|-----|--------------|--------------|
| MF | GO:0042626 | ATPase-coupled     | 102 | -0.430277488 | -1.510048829 |
| BP | GO:1901568 | fatty acid deriva  | 167 | -0.430353752 | -1.423699122 |
| BP | GO:0055088 | lipid homeostasi   | 146 | -0.43062089  | -1.398516322 |
| BP | GO:0006090 | pyruvate metabo    | 149 | -0.430635629 | -1.51937183  |
| BP | GO:0022600 | digestive system   | 99  | -0.430973424 | -1.653708501 |
| BP | GO:1903008 | organelle disass   | 100 | -0.43150836  | -1.552917736 |
| CC | GO:0031091 | platelet alpha gr  | 91  | -0.433814136 | -1.658969222 |
| BP | GO:1900034 | regulation of cel  | 78  | -0.435053547 | -1.541106813 |
| MF | GO:0001098 | basal transcriptio | 71  | -0.435702756 | -1.528064736 |
| MF | GO:0001099 | basal RNA poly     | 71  | -0.435702756 | -1.528064736 |
| BP | GO:0061008 | hepaticobiliary s  | 138 | -0.437148878 | -1.35934771  |
| BP | GO:0051893 | regulation of fo   | 60  | -0.437341427 | -1.475176713 |
| BP | GO:0090109 | regulation of cel  | 60  | -0.437341427 | -1.475176713 |
| BP | GO:0150116 | regulation of cel  | 60  | -0.437341427 | -1.475176713 |
| MF | GO:0004402 | histone acetyltra  | 64  | -0.438724452 | -1.518898477 |
| BP | GO:0001889 | liver developme    | 135 | -0.439407842 | -1.590248594 |
| BP | GO:0046165 | alcohol biosynt    | 175 | -0.439650093 | -1.480110974 |
| BP | GO:0009267 | cellular respons   | 147 | -0.441214677 | -1.438866121 |
| BP | GO:0006690 | icosanoid metab    | 114 | -0.441226752 | -1.446958923 |
| BP | GO:0046889 | positive regulati  | 81  | -0.44214066  | -1.561839785 |
| BP | GO:0032922 | circadian regula   | 62  | -0.44275827  | -1.536142856 |
| BP | GO:0006694 | steroid biosynth   | 196 | -0.44492316  | -1.529839288 |
| BP | GO:1901607 | alpha-amino aci    | 64  | -0.445236521 | -1.541443768 |
| BP | GO:0060964 | regulation of ge   | 83  | -0.445774846 | -1.607634939 |
| BP | GO:0006633 | fatty acid biosyr  | 162 | -0.446131033 | -1.622673323 |
| BP | GO:0046364 | monosaccharide     | 91  | -0.446315359 | -1.706775745 |
| MF | GO:0015297 | antiporter activit | 85  | -0.446699322 | -1.662216584 |
| BP | GO:0070830 | bicellular tight j | 55  | -0.447570653 | -1.471555085 |
| BP | GO:0044242 | cellular lipid cat | 216 | -0.449132316 | -1.643711805 |
| BP | GO:0051188 | cofactor biosynt   | 230 | -0.449543609 | -1.763609782 |
| BP | GO:1901616 | organic hydroxy    | 74  | -0.449848702 | -1.596522331 |
| MF | GO:0008514 | organic anion tr   | 209 | -0.450055698 | -1.621893028 |
| MF | GO:0015291 | secondary active   | 237 | -0.451140831 | -1.829416098 |
| MF | GO:0022853 | active ion trans   | 236 | -0.45174857  | -1.829368772 |
| BP | GO:0072330 | monocarboxylic     | 235 | -0.454118604 | -1.821579819 |
| MF | GO:0043175 | RNA polymeras      | 60  | -0.454888414 | -1.534363666 |
| BP | GO:1990748 | cellular detoxifi  | 109 | -0.455283743 | -1.440288517 |
| BP | GO:1905953 | negative regulat   | 55  | -0.455297705 | -1.496960644 |
| BP | GO:0000422 | autophagy of m     | 76  | -0.456098333 | -1.589608166 |
| BP | GO:0061726 | mitochondrion c    | 76  | -0.456098333 | -1.589608166 |
| CC | GO:0008023 | transcription elo  | 58  | -0.456906965 | -1.552434587 |
| MF | GO:0005342 | organic acid tra   | 152 | -0.45786228  | -1.647409453 |
| MF | GO:0046943 | carboxylic acid    | 152 | -0.45786228  | -1.647409453 |
| MF | GO:0015294 | solute:cation syr  | 103 | -0.458164551 | -1.564202524 |
| BP | GO:0008652 | cellular amino a   | 81  | -0.458398887 | -1.61927116  |
| MF | GO:0004497 | monooxygenase      | 99  | -0.458975518 | -1.76115666  |

|    |            |                   |     |              |              |
|----|------------|-------------------|-----|--------------|--------------|
| BP | GO:0019218 | regulation of ste | 124 | -0.460100969 | -1.601199491 |
| BP | GO:0042304 | regulation of fat | 55  | -0.460994354 | -1.515690495 |
| BP | GO:0019319 | hexose biosynth   | 85  | -0.461689744 | -1.717997568 |
| BP | GO:0002576 | platelet degranu  | 128 | -0.462128475 | -1.620541906 |
| BP | GO:0019674 | NAD metabolic     | 51  | -0.462223989 | -1.465834224 |
| BP | GO:0090181 | regulation of ch  | 63  | -0.462645306 | -1.591304876 |
| BP | GO:0006094 | gluconeogenesis   | 82  | -0.464514093 | -1.619958639 |
| MF | GO:0015293 | symporter activi  | 144 | -0.465950407 | -1.496003934 |
| BP | GO:0046854 | phosphatidylin    | 50  | -0.467107757 | -1.506582215 |
| MF | GO:0016597 | amino acid bind   | 56  | -0.468195278 | -1.597376508 |
| BP | GO:0061045 | negative regulat  | 75  | -0.47129938  | -1.676570136 |
| BP | GO:0030004 | cellular monova   | 108 | -0.471443098 | -1.486421548 |
| BP | GO:0009060 | aerobic respirati | 83  | -0.471556578 | -1.700613745 |
| BP | GO:0001676 | long-chain fatty  | 108 | -0.472059606 | -1.488365347 |
| CC | GO:0016323 | basolateral plasm | 217 | -0.475160378 | -1.746468116 |
| BP | GO:0007040 | lysosome organi   | 61  | -0.475965968 | -1.63797178  |
| BP | GO:0080171 | lytic vacuole org | 61  | -0.475965968 | -1.63797178  |
| BP | GO:0009108 | coenzyme biosy    | 146 | -0.479042043 | -1.555772449 |
| BP | GO:0006639 | acylglycerol me   | 126 | -0.479185248 | -1.733133373 |
| BP | GO:0006513 | protein monoub    | 66  | -0.479538923 | -1.651337256 |
| BP | GO:0006638 | neutral lipid met | 127 | -0.479724713 | -1.739941637 |
| BP | GO:0071466 | cellular respons  | 180 | -0.480088301 | -1.871971984 |
| MF | GO:0005319 | lipid transporter | 130 | -0.480704664 | -1.701893902 |
| MF | GO:0016616 | oxidoreductase ;  | 119 | -0.481443202 | -1.558390461 |
| BP | GO:0050994 | regulation of lip | 54  | -0.487177822 | -1.596846353 |
| MF | GO:0015370 | solute:sodium sy  | 73  | -0.488347807 | -1.698863549 |
| BP | GO:0017001 | antibiotic catabo | 57  | -0.489098461 | -1.669585282 |
| CC | GO:0010494 | cytoplasmic stre  | 66  | -0.48964569  | -1.686140856 |
| BP | GO:0042398 | cellular modific  | 50  | -0.490784963 | -1.582949299 |
| BP | GO:0006081 | cellular aldehyd  | 61  | -0.491076354 | -1.689972108 |
| MF | GO:0019829 | ATPase-coupled    | 53  | -0.491435466 | -1.563302978 |
| CC | GO:0031093 | platelet alpha gr | 67  | -0.491737088 | -1.709618016 |
| BP | GO:0097006 | regulation of pl  | 95  | -0.494409952 | -1.789508824 |
| BP | GO:0033013 | tetrapyrrole met  | 58  | -0.494547212 | -1.680325002 |
| CC | GO:0032592 | integral compon   | 70  | -0.494619773 | -1.73731617  |
| MF | GO:0042625 | ATPase-coupled    | 57  | -0.495604931 | -1.691795752 |
| CC | GO:0012507 | ER to Golgi tran  | 60  | -0.495699377 | -1.672021291 |
| MF | GO:0046906 | tetrapyrrole binc | 140 | -0.496074618 | -1.554119935 |
| BP | GO:0045851 | pH reduction      | 53  | -0.496600465 | -1.579733331 |
| BP | GO:0030641 | regulation of cel | 90  | -0.497264021 | -1.884020062 |
| BP | GO:0030258 | lipid modificati  | 238 | -0.497410786 | -2.022388412 |
| BP | GO:0006733 | oxidoreduction    | 51  | -0.497420336 | -1.577451128 |
| BP | GO:0016125 | sterol metabolic  | 166 | -0.497776305 | -1.645489732 |
| MF | GO:0050661 | NADP binding      | 52  | -0.500139674 | -1.620216346 |
| BP | GO:0006805 | xenobiotic meta   | 125 | -0.50041733  | -1.821331521 |
| CC | GO:0098573 | intrinsic compo   | 71  | -0.501077832 | -1.757343405 |

|    |            |                   |     |              |              |
|----|------------|-------------------|-----|--------------|--------------|
| MF | GO:0001221 | transcription col | 43  | -0.501539957 | -1.561310978 |
| BP | GO:0034308 | primary alcohol   | 85  | -0.501908135 | -1.867654558 |
| BP | GO:0045540 | regulation of ch  | 50  | -0.502531209 | -1.620834959 |
| BP | GO:0106118 | regulation of ste | 50  | -0.502531209 | -1.620834959 |
| BP | GO:1900046 | regulation of he  | 79  | -0.503188891 | -1.764031089 |
| MF | GO:0016614 | oxidoreductase :  | 128 | -0.50354547  | -1.765778522 |
| MF | GO:0005496 | steroid binding   | 95  | -0.503760032 | -1.82335129  |
| BP | GO:0033865 | nucleoside bisph  | 139 | -0.507213284 | -1.588138788 |
| BP | GO:0033875 | ribonucleoside t  | 139 | -0.507213284 | -1.588138788 |
| BP | GO:0034032 | purine nucleosic  | 139 | -0.507213284 | -1.588138788 |
| MF | GO:0016903 | oxidoreductase :  | 43  | -0.508528729 | -1.583067263 |
| BP | GO:0043648 | dicarboxylic aci  | 97  | -0.509036851 | -1.897512893 |
| BP | GO:0006892 | post-Golgi vesic  | 104 | -0.509825185 | -1.773009604 |
| MF | GO:0020037 | heme binding      | 132 | -0.509937949 | -1.833792806 |
| BP | GO:0006893 | Golgi to plasma   | 63  | -0.51005986  | -1.754390958 |
| BP | GO:0050818 | regulation of co  | 81  | -0.51041156  | -1.803003328 |
| BP | GO:1903036 | positive regulati | 70  | -0.511987318 | -1.798318416 |
| BP | GO:0042737 | drug catabolic p  | 139 | -0.51258325  | -1.604952722 |
| BP | GO:0051187 | cofactor catabol  | 64  | -0.513965083 | -1.779387445 |
| BP | GO:0006885 | regulation of pF  | 98  | -0.514553997 | -1.933168293 |
| BP | GO:0009066 | aspartate family  | 49  | -0.515598863 | -1.686295519 |
| BP | GO:0042572 | retinol metaboli  | 41  | -0.516198448 | -1.636019028 |
| BP | GO:0006641 | triglyceride met  | 102 | -0.516271561 | -1.811843028 |
| BP | GO:0044275 | cellular carbohy  | 45  | -0.516771399 | -1.65759855  |
| BP | GO:0030193 | regulation of blk | 78  | -0.517377286 | -1.832725339 |
| BP | GO:1900047 | negative regulat  | 54  | -0.517538659 | -1.696361538 |
| BP | GO:0051453 | regulation of int | 84  | -0.517758562 | -1.914257426 |
| CC | GO:0016469 | proton-transport  | 48  | -0.518399941 | -1.660237562 |
| BP | GO:0015918 | sterol transport  | 107 | -0.520544107 | -1.811445041 |
| BP | GO:0016999 | antibiotic metab  | 120 | -0.520643504 | -1.687196496 |
| BP | GO:0006635 | fatty acid beta-o | 72  | -0.522286438 | -1.829971303 |
| BP | GO:0019076 | viral release fro | 35  | -0.523540874 | -1.658579985 |
| BP | GO:0035890 | exit from host    | 35  | -0.523540874 | -1.658579985 |
| BP | GO:0035891 | exit from host c  | 35  | -0.523540874 | -1.658579985 |
| BP | GO:0046503 | glycerolipid cata | 64  | -0.524269726 | -1.815062927 |
| MF | GO:1901682 | sulfur compoun    | 35  | -0.525287124 | -1.664112112 |
| BP | GO:0030301 | cholesterol trans | 94  | -0.525545765 | -1.884932155 |
| MF | GO:0032934 | sterol binding    | 56  | -0.525574006 | -1.793139765 |
| BP | GO:0034381 | plasma lipoprote  | 65  | -0.525738455 | -1.795364076 |
| MF | GO:0030170 | pyridoxal phosp   | 54  | -0.527111141 | -1.727737728 |
| MF | GO:0070279 | vitamin B6 bind   | 54  | -0.527111141 | -1.727737728 |
| BP | GO:0034440 | lipid oxidation   | 101 | -0.52899397  | -1.912720758 |
| BP | GO:0050819 | negative regulat  | 55  | -0.530323962 | -1.743637385 |
| BP | GO:1990928 | response to amit  | 45  | -0.532610529 | -1.708404225 |
| MF | GO:0017112 | Rab guanyl-nuc    | 37  | -0.533620134 | -1.669114112 |
| BP | GO:0019395 | fatty acid oxidat | 99  | -0.533773478 | -2.048167447 |

|    |            |                    |     |              |              |
|----|------------|--------------------|-----|--------------|--------------|
| BP | GO:0030195 | negative regulat   | 53  | -0.53631534  | -1.706070129 |
| BP | GO:0035329 | hippo signaling    | 38  | -0.536718744 | -1.674282529 |
| BP | GO:1901605 | alpha-amino aci    | 199 | -0.536848261 | -1.860388356 |
| BP | GO:0031100 | animal organ re    | 72  | -0.536916562 | -1.881231887 |
| BP | GO:0035384 | thioester biosynt  | 54  | -0.537040064 | -1.76028224  |
| BP | GO:0071616 | acyl-CoA biosyn    | 54  | -0.537040064 | -1.76028224  |
| BP | GO:0033866 | nucleoside bisph   | 68  | -0.537600974 | -1.921674258 |
| BP | GO:0034030 | ribonucleoside t   | 68  | -0.537600974 | -1.921674258 |
| BP | GO:0034033 | purine nucleosid   | 68  | -0.537600974 | -1.921674258 |
| BP | GO:0032365 | intracellular lipi | 43  | -0.538509325 | -1.67639788  |
| CC | GO:0016592 | mediator compl     | 37  | -0.539484894 | -1.687458534 |
| BP | GO:0042558 | pteridine-contain  | 34  | -0.539993622 | -1.726050157 |
| BP | GO:0014741 | negative regulat   | 34  | -0.540166381 | -1.726602367 |
| BP | GO:0051452 | intracellular pH   | 51  | -0.542365069 | -1.719982736 |
| MF | GO:0016877 | ligase activity, f | 40  | -0.542502772 | -1.734616014 |
| MF | GO:0016830 | carbon-carbon l    | 51  | -0.542549567 | -1.720567826 |
| BP | GO:0046164 | alcohol catabolic  | 54  | -0.543316228 | -1.780853928 |
| BP | GO:0086005 | ventricular cardi  | 35  | -0.543958016 | -1.723261587 |
| BP | GO:0008203 | cholesterol meta   | 150 | -0.544151381 | -1.954655597 |
| BP | GO:0019433 | triglyceride cata  | 35  | -0.54907871  | -1.739483971 |
| CC | GO:0099023 | vesicle tethering  | 64  | -0.54940144  | -1.902070892 |
| BP | GO:1902652 | secondary alcoh    | 161 | -0.55025087  | -1.99790692  |
| BP | GO:0032374 | regulation of ch   | 57  | -0.550670872 | -1.879768709 |
| BP | GO:1903514 | release of seques  | 34  | -0.551164165 | -1.761755983 |
| MF | GO:0015485 | cholesterol bind   | 49  | -0.551481829 | -1.80365281  |
| BP | GO:0032371 | regulation of ste  | 58  | -0.554269226 | -1.883242721 |
| BP | GO:0046460 | neutral lipid bio  | 41  | -0.554389619 | -1.757060619 |
| BP | GO:0046463 | acylglycerol bio   | 41  | -0.554389619 | -1.757060619 |
| MF | GO:0050660 | flavin adenine d   | 79  | -0.55564815  | -1.947937704 |
| BP | GO:0016126 | sterol biosynthes  | 81  | -0.558017834 | -1.971170114 |
| BP | GO:0046621 | negative regulat   | 39  | -0.558294722 | -1.774813162 |
| BP | GO:0009064 | glutamine famil    | 72  | -0.559438952 | -1.96014515  |
| BP | GO:0090303 | positive regulati  | 58  | -0.560298451 | -1.903728242 |
| CC | GO:0005903 | brush border       | 99  | -0.561350748 | -2.153985494 |
| BP | GO:0019432 | triglyceride bios  | 39  | -0.561972036 | -1.786503304 |
| BP | GO:0010614 | negative regulat   | 32  | -0.563511754 | -1.819992574 |
| MF | GO:0015301 | anion:anion anti   | 31  | -0.564283242 | -1.800243324 |
| MF | GO:0140323 | solute:anion anti  | 31  | -0.564283242 | -1.800243324 |
| BP | GO:0055092 | sterol homeostas   | 93  | -0.565131185 | -2.036738295 |
| BP | GO:0042632 | cholesterol hom    | 92  | -0.566355947 | -2.131556989 |
| BP | GO:0009069 | serine family arr  | 40  | -0.569092598 | -1.819635189 |
| MF | GO:0032451 | demethylase acti   | 37  | -0.574620483 | -1.797359389 |
| MF | GO:1901618 | organic hydroxy    | 44  | -0.574905602 | -1.810784725 |
| MF | GO:0120013 | lipid transfer act | 40  | -0.576847138 | -1.844429806 |
| BP | GO:1902653 | secondary alcoh    | 76  | -0.577384968 | -2.012320134 |
| BP | GO:0072329 | monocarboxylic     | 131 | -0.5775906   | -2.075973102 |

|    |            |                    |     |              |              |
|----|------------|--------------------|-----|--------------|--------------|
| BP | GO:0061912 | selective autoph   | 48  | -0.577632511 | -1.849936921 |
| MF | GO:0019825 | oxygen binding     | 35  | -0.578240811 | -1.831869647 |
| MF | GO:0009678 | pyrophosphate l    | 33  | -0.578258448 | -1.861396724 |
| BP | GO:0006536 | glutamate metab    | 34  | -0.578261104 | -1.848369366 |
| BP | GO:0060612 | adipose tissue de  | 42  | -0.578461191 | -1.852463411 |
| MF | GO:0016627 | oxidoreductase ;   | 58  | -0.578578271 | -1.965837658 |
| MF | GO:0015144 | carbohydrate tra   | 37  | -0.578925026 | -1.810823597 |
| BP | GO:0006695 | cholesterol biosy  | 75  | -0.579135132 | -2.060178115 |
| CC | GO:0098576 | luminal side of    | 32  | -0.579457351 | -1.871492597 |
| BP | GO:0055022 | negative regulat   | 31  | -0.580209037 | -1.851051685 |
| BP | GO:0061117 | negative regulat   | 31  | -0.580209037 | -1.851051685 |
| BP | GO:0071827 | plasma lipoprote   | 44  | -0.581056544 | -1.830158398 |
| BP | GO:0090382 | phagosome mat      | 44  | -0.581247655 | -1.830760342 |
| CC | GO:0005778 | peroxisomal me     | 59  | -0.582654717 | -1.996844322 |
| CC | GO:0031903 | microbody merr     | 59  | -0.582654717 | -1.996844322 |
| BP | GO:0019835 | cytolysis          | 40  | -0.585055217 | -1.870674584 |
| MF | GO:0016709 | oxidoreductase ;   | 39  | -0.58521908  | -1.860405419 |
| MF | GO:0016878 | acid-thiol ligase  | 30  | -0.585828196 | -1.870252309 |
| BP | GO:0046461 | neutral lipid cata | 43  | -0.586864058 | -1.826927812 |
| BP | GO:0046464 | acylglycerol cata  | 43  | -0.586864058 | -1.826927812 |
| BP | GO:0071825 | protein-lipid cor  | 48  | -0.587041999 | -1.880071929 |
| BP | GO:0010880 | regulation of rel  | 29  | -0.588761789 | -1.929589157 |
| BP | GO:0008211 | glucocorticoid n   | 25  | -0.589026574 | -1.776337373 |
| BP | GO:0051181 | cofactor transpo   | 41  | -0.589173821 | -1.867304302 |
| BP | GO:0006637 | acyl-CoA metab     | 104 | -0.589513426 | -2.050139924 |
| BP | GO:0035383 | thioester metabo   | 104 | -0.589513426 | -2.050139924 |
| BP | GO:0032369 | negative regulat   | 40  | -0.589710711 | -1.885560214 |
| BP | GO:0034198 | cellular respons   | 42  | -0.589877868 | -1.889024161 |
| BP | GO:0098927 | vesicle-mediatec   | 41  | -0.591971099 | -1.876169882 |
| BP | GO:0009062 | fatty acid catabo  | 107 | -0.59244115  | -2.061640059 |
| MF | GO:0008395 | steroid hydroxy    | 38  | -0.592580227 | -1.848541221 |
| BP | GO:0099625 | ventricular cardi  | 28  | -0.593268895 | -1.907278525 |
| BP | GO:0033344 | cholesterol efflu  | 53  | -0.595237234 | -1.893506278 |
| MF | GO:0008028 | monocarboxylic     | 51  | -0.595263184 | -1.887736613 |
| CC | GO:0032994 | protein-lipid cor  | 39  | -0.595743032 | -1.893860952 |
| BP | GO:0015701 | bicarbonate tran   | 42  | -0.596259599 | -1.909461009 |
| BP | GO:0048821 | erythrocyte dev    | 33  | -0.600629055 | -1.933407043 |
| CC | GO:0034358 | plasma lipoprote   | 37  | -0.602137902 | -1.883431313 |
| CC | GO:1990777 | lipoprotein parti  | 37  | -0.602137902 | -1.883431313 |
| BP | GO:0045022 | early endosome     | 38  | -0.608785371 | -1.899092816 |
| BP | GO:0034453 | microtubule anc    | 26  | -0.614353866 | -1.85758226  |
| BP | GO:0060307 | regulation of ve   | 24  | -0.616203929 | -1.82427294  |
| CC | GO:0034364 | high-density lip   | 26  | -0.618739081 | -1.870841554 |
| CC | GO:0005777 | peroxisome         | 133 | -0.619012671 | -2.237158996 |
| CC | GO:0042579 | microbody          | 133 | -0.619012671 | -2.237158996 |
| MF | GO:1901567 | fatty acid deriva  | 27  | -0.61922573  | -1.911390498 |

|    |            |                     |     |              |              |
|----|------------|---------------------|-----|--------------|--------------|
| BP | GO:0051004 | regulation of lip   | 23  | -0.621826667 | -1.830087471 |
| BP | GO:0009065 | glutamine famil     | 27  | -0.621909994 | -1.919676129 |
| BP | GO:0006730 | one-carbon met      | 27  | -0.625157444 | -1.929700173 |
| BP | GO:0032528 | microvillus orga    | 24  | -0.626517192 | -1.854805376 |
| BP | GO:0097066 | response to thyr    | 26  | -0.627544146 | -1.897464861 |
| MF | GO:0030371 | translation repre   | 26  | -0.62950014  | -1.903379076 |
| BP | GO:0006063 | uronic acid met     | 24  | -0.62969352  | -1.864208901 |
| BP | GO:0019585 | glucuronate met     | 24  | -0.62969352  | -1.864208901 |
| MF | GO:0051287 | NAD binding         | 56  | -0.631848926 | -2.15572578  |
| BP | GO:0009074 | aromatic amino      | 28  | -0.633188022 | -2.03561307  |
| BP | GO:0002374 | cytokine secreti    | 19  | -0.63597525  | -1.816196981 |
| BP | GO:0072376 | protein activatio   | 27  | -0.636185899 | -1.963742175 |
| BP | GO:0072378 | blood coagulatio    | 27  | -0.636185899 | -1.963742175 |
| BP | GO:0009063 | cellular amino a    | 124 | -0.637688776 | -2.219223629 |
| BP | GO:0046653 | tetrahydrofolate    | 19  | -0.639189586 | -1.825376375 |
| MF | GO:0015248 | sterol transporte   | 31  | -0.639358123 | -2.039756113 |
| MF | GO:0034593 | phosphatidyli       | 23  | -0.643485429 | -1.893831005 |
| BP | GO:0034377 | plasma lipoprote    | 27  | -0.645578955 | -1.99273612  |
| MF | GO:0001223 | transcription co    | 23  | -0.645897972 | -1.900931321 |
| BP | GO:0000423 | mitophagy           | 22  | -0.647179806 | -1.831341877 |
| BP | GO:0065005 | protein-lipid cor   | 31  | -0.649706119 | -2.072769519 |
| MF | GO:0016790 | thiolester hydro    | 36  | -0.650856973 | -1.99728812  |
| BP | GO:1901606 | alpha-amino aci     | 105 | -0.65141277  | -2.060024258 |
| BP | GO:0003081 | regulation of sy    | 25  | -0.652045849 | -1.966385663 |
| BP | GO:0042759 | long-chain fatty    | 29  | -0.652880054 | -2.139728318 |
| BP | GO:0008053 | mitochondrial fi    | 22  | -0.653276353 | -1.848593437 |
| CC | GO:0031306 | intrinsic compo     | 21  | -0.655882135 | -1.863134945 |
| BP | GO:0050892 | intestinal absorp   | 38  | -0.65660189  | -2.048255416 |
| MF | GO:0070001 | aspartic-type pe    | 25  | -0.656735031 | -1.980526908 |
| BP | GO:0045940 | positive regulati   | 30  | -0.659384018 | -2.105078742 |
| BP | GO:0034367 | protein-containi    | 29  | -0.66028873  | -2.16400928  |
| BP | GO:0034368 | protein-lipid cor   | 28  | -0.661984507 | -2.128189839 |
| BP | GO:0034369 | plasma lipoprote    | 28  | -0.661984507 | -2.128189839 |
| BP | GO:0090140 | regulation of mi    | 22  | -0.667381919 | -1.888508332 |
| MF | GO:0034185 | apolipoprotein b    | 17  | -0.667623485 | -1.816291709 |
| BP | GO:0098856 | intestinal lipid al | 17  | -0.66815497  | -1.817737632 |
| BP | GO:0006699 | bile acid biosynt   | 36  | -0.670787223 | -2.058448179 |
| BP | GO:0050820 | positive regulati   | 27  | -0.672239412 | -2.075030093 |
| MF | GO:0004190 | aspartic-type en    | 24  | -0.672263248 | -1.990236665 |
| BP | GO:0008206 | bile acid metabo    | 47  | -0.674994132 | -2.208772929 |
| BP | GO:0090383 | phagosome acid      | 28  | -0.678355049 | -2.180818899 |
| BP | GO:0007031 | peroxisome org      | 80  | -0.678853725 | -2.426421042 |
| BP | GO:0030194 | positive regulati   | 26  | -0.680640246 | -2.058008124 |
| BP | GO:1900048 | positive regulati   | 26  | -0.680640246 | -2.058008124 |
| MF | GO:0044769 | ATPase activity,    | 22  | -0.680911841 | -1.926794313 |
| MF | GO:0046961 | proton-transport    | 22  | -0.680911841 | -1.926794313 |

|    |            |                     |    |              |              |
|----|------------|---------------------|----|--------------|--------------|
| BP | GO:0006677 | glycosylceramid     | 20 | -0.680913237 | -1.897352389 |
| BP | GO:0009068 | aspartate family    | 23 | -0.681099856 | -2.004533387 |
| BP | GO:0043574 | peroxisomal tra     | 70 | -0.683027607 | -2.399085061 |
| BP | GO:0006625 | protein targeting   | 68 | -0.684094632 | -2.445321171 |
| BP | GO:0072662 | protein localizat   | 68 | -0.684094632 | -2.445321171 |
| BP | GO:0072663 | establishment of    | 68 | -0.684094632 | -2.445321171 |
| CC | GO:0042611 | MHC protein co      | 23 | -0.686916618 | -2.021652598 |
| CC | GO:0033176 | proton-transport    | 26 | -0.687880009 | -2.07989853  |
| BP | GO:0070989 | oxidative demet     | 19 | -0.689505392 | -1.969066579 |
| MF | GO:0008308 | voltage-gated ar    | 17 | -0.690846507 | -1.879470708 |
| BP | GO:0032372 | negative regulat    | 24 | -0.691328135 | -2.0466783   |
| BP | GO:0032375 | negative regulat    | 24 | -0.691328135 | -2.0466783   |
| MF | GO:0050811 | GABA receptor       | 17 | -0.695363047 | -1.891758104 |
| BP | GO:1901998 | toxin transport     | 37 | -0.69589882  | -2.176706739 |
| BP | GO:0042168 | heme metabolic      | 31 | -0.697170047 | -2.224194571 |
| BP | GO:0006084 | acetyl-CoA met&     | 38 | -0.698694981 | -2.179563903 |
| BP | GO:0006067 | ethanol metabol     | 21 | -0.702215328 | -1.994751569 |
| BP | GO:1904469 | positive regulati   | 20 | -0.702852733 | -1.958486397 |
| CC | GO:0031526 | brush border me     | 53 | -0.702911608 | -2.236028708 |
| MF | GO:0000062 | fatty-acyl-CoA l    | 21 | -0.707779465 | -2.010557361 |
| MF | GO:0120015 | sterol transfer ac  | 19 | -0.709388204 | -2.025847255 |
| BP | GO:0060044 | negative regulat    | 20 | -0.712210493 | -1.984561627 |
| MF | GO:0015106 | bicarbonate tran    | 19 | -0.712251211 | -2.034023335 |
| CC | GO:0036019 | endolysosome        | 20 | -0.714373427 | -1.990588602 |
| CC | GO:0016471 | vacuolar proton     | 17 | -0.717631844 | -1.9523411   |
| BP | GO:0002418 | immune respons      | 17 | -0.71774631  | -1.952652508 |
| BP | GO:0034375 | high-density lip    | 18 | -0.718117866 | -2.003150228 |
| MF | GO:0120020 | cholesterol trans   | 18 | -0.724838371 | -2.021896707 |
| BP | GO:0002347 | response to tum     | 23 | -0.725332872 | -2.134714822 |
| BP | GO:0034380 | high-density lip    | 14 | -0.72670369  | -1.932540615 |
| BP | GO:0043691 | reverse choleste    | 17 | -0.730948257 | -1.988568841 |
| BP | GO:0006099 | tricarboxylic aci   | 34 | -0.73134211  | -2.337681617 |
| MF | GO:0010181 | FMN binding         | 16 | -0.733735118 | -1.997579392 |
| BP | GO:0006778 | porphyrin-conta     | 38 | -0.733806768 | -2.289094367 |
| MF | GO:0005402 | carbohydrate:ca     | 19 | -0.738049379 | -2.107696883 |
| CC | GO:0034361 | very-low-densit     | 20 | -0.738238438 | -2.057088022 |
| CC | GO:0034385 | triglyceride-rich   | 20 | -0.738238438 | -2.057088022 |
| MF | GO:0055102 | lipase inhibitor &  | 17 | -0.738571746 | -2.009308794 |
| BP | GO:0034433 | steroid esterifica  | 17 | -0.740455327 | -2.014433137 |
| BP | GO:0034434 | sterol esterificati | 17 | -0.740455327 | -2.014433137 |
| BP | GO:0034435 | cholesterol ester   | 17 | -0.740455327 | -2.014433137 |
| BP | GO:0034370 | triglyceride-rich   | 14 | -0.741754936 | -1.972566755 |
| BP | GO:0002834 | regulation of res   | 14 | -0.743781662 | -1.977956477 |
| BP | GO:0002837 | regulation of im    | 14 | -0.743781662 | -1.977956477 |
| CC | GO:0045239 | tricarboxylic aci   | 14 | -0.74420483  | -1.979081819 |
| BP | GO:0036092 | phosphatidyli       | 14 | -0.7446039   | -1.980143073 |



|    |            |                    |    |              |              |
|----|------------|--------------------|----|--------------|--------------|
| BP | GO:0097067 | cellular response  | 16 | -0.746562137 | -2.032500701 |
| CC | GO:0034362 | low-density lipo   | 14 | -0.747384257 | -1.987536945 |
| MF | GO:0000900 | translation repre  | 15 | -0.750670867 | -2.000303532 |
| BP | GO:0015669 | gas transport      | 18 | -0.751689697 | -2.096797001 |
| BP | GO:0006085 | acetyl-CoA bios    | 22 | -0.755536458 | -2.137961572 |
| BP | GO:0006086 | acetyl-CoA bios    | 16 | -0.757099349 | -2.061188051 |
| MF | GO:0008179 | adenylate cyclas   | 13 | -0.757346671 | -1.952129979 |
| BP | GO:0006000 | fructose metabo    | 15 | -0.758128205 | -2.020175009 |
| BP | GO:0046415 | urate metabolic    | 13 | -0.758934463 | -1.956222657 |
| MF | GO:0047617 | acyl-CoA hydro     | 19 | -0.759555828 | -2.169114285 |
| BP | GO:0072350 | tricarboxylic aci  | 14 | -0.761226968 | -2.0243492   |
| BP | GO:0001991 | regulation of sy   | 18 | -0.761302455 | -2.12361126  |
| CC | GO:0046930 | pore complex       | 23 | -0.763322706 | -2.246522054 |
| BP | GO:0006553 | lysine metabolic   | 13 | -0.765873491 | -1.974108633 |
| MF | GO:0005542 | folic acid bindin  | 12 | -0.767055453 | -1.947212556 |
| BP | GO:0009081 | branched-chain     | 21 | -0.771543211 | -2.191688174 |
| BP | GO:0009083 | branched-chain     | 21 | -0.771543211 | -2.191688174 |
| MF | GO:0016289 | CoA hydrolase &    | 21 | -0.773272442 | -2.196600321 |
| BP | GO:0006544 | glycine metabol    | 17 | -0.774256011 | -2.106389013 |
| BP | GO:0006554 | lysine catabolic   | 12 | -0.774719464 | -1.966668071 |
| BP | GO:0006103 | 2-oxoglutarate r   | 16 | -0.775978245 | -2.112585473 |
| BP | GO:0018206 | peptidyl-methio    | 13 | -0.778423346 | -2.006457026 |
| CC | GO:0005782 | peroxisomal ma     | 51 | -0.778975809 | -2.470337821 |
| CC | GO:0031907 | microbody lum      | 51 | -0.778975809 | -2.470337821 |
| BP | GO:0043116 | negative regulat   | 13 | -0.781276943 | -2.013812434 |
| BP | GO:0034372 | very-low-densit    | 12 | -0.786217216 | -1.99585575  |
| MF | GO:0060229 | lipase activator & | 14 | -0.790405141 | -2.101943417 |
| BP | GO:0006525 | arginine metabo    | 19 | -0.794344081 | -2.268461423 |
| BP | GO:0051917 | regulation of fib  | 14 | -0.794882721 | -2.113850752 |
| BP | GO:0009437 | carnitine metabo   | 13 | -0.802025338 | -2.067293309 |
| BP | GO:0006069 | ethanol oxidatio   | 12 | -0.802880965 | -2.038157593 |
| MF | GO:0019203 | carbohydrate ph    | 10 | -0.815921269 | -2.021438333 |
| MF | GO:0050308 | sugar-phosphata    | 10 | -0.815921269 | -2.021438333 |
| BP | GO:0002002 | regulation of an   | 11 | -0.818163407 | -2.06531305  |
| BP | GO:0002003 | angiotensin mat    | 11 | -0.818163407 | -2.06531305  |
| BP | GO:0006577 | amino-acid beta    | 17 | -0.823831102 | -2.241259685 |
| BP | GO:0046185 | aldehyde catabo    | 11 | -0.826685226 | -2.08682492  |
| BP | GO:0007597 | blood coagulatio   | 18 | -0.828847496 | -2.31202443  |
| BP | GO:0051918 | negative regulat   | 10 | -0.831182737 | -2.059248495 |
| MF | GO:0018455 | alcohol dehydro    | 10 | -0.832552577 | -2.062642265 |
| BP | GO:0033700 | phospholipid ef    | 12 | -0.833919457 | -2.116950518 |
| BP | GO:0034384 | high-density lipo  | 16 | -0.837359484 | -2.279694688 |
| MF | GO:0016290 | palmitoyl-CoA l    | 13 | -0.83997544  | -2.165113151 |
| BP | GO:1902260 | negative regulat   | 12 | -0.840047056 | -2.132505764 |
| MF | GO:0102991 | myristoyl-CoA l    | 10 | -0.848199007 | -2.101406167 |
| CC | GO:0042627 | chylomicron        | 13 | -0.848533074 | -2.187171231 |

|    |            |                  |    |              |              |
|----|------------|------------------|----|--------------|--------------|
| BP | GO:0035376 | sterol import    | 10 | -0.888756359 | -2.201886679 |
| BP | GO:0070508 | cholesterol impc | 10 | -0.888756359 | -2.201886679 |

| pvalue      | p.adjust    | qvalues     | leading_edge     | core_enrichmen | rank  |
|-------------|-------------|-------------|------------------|----------------|-------|
| 0.002795213 | 0.046310038 | 0.04152423  | tags=20%, list=5 | 10551/155465   | 1683  |
| 7.36E-08    | 1.04E-05    | 9.36E-06    | tags=77%, list=1 | 28409/3497/35  | 7047  |
| 1.00E-10    | 3.85E-08    | 3.45E-08    | tags=75%, list=2 | 28773/28883/2  | 7427  |
| 7.57E-08    | 1.06E-05    | 9.47E-06    | tags=72%, list=1 | 28409/3497/35  | 7047  |
| 5.55E-07    | 6.10E-05    | 5.47E-05    | tags=64%, list=1 | 28409/3497/35  | 6994  |
| 3.47E-09    | 7.59E-07    | 6.80E-07    | tags=50%, list=1 | 28883/28896/2  | 7047  |
| 1.06E-05    | 0.000732095 | 0.000656438 | tags=57%, list=2 | 219437/390148  | 7958  |
| 7.52E-07    | 7.60E-05    | 6.82E-05    | tags=38%, list=2 | 28883/28896/2  | 7427  |
| 7.52E-07    | 7.60E-05    | 6.82E-05    | tags=38%, list=2 | 28883/28896/2  | 7427  |
| 3.21E-06    | 0.000265083 | 0.000237689 | tags=62%, list=1 | 28883/28896/2  | 6994  |
| 4.30E-07    | 4.90E-05    | 4.39E-05    | tags=37%, list=2 | 28883/28896/2  | 7427  |
| 4.26E-05    | 0.002253552 | 0.002020663 | tags=43%, list=1 | 343702/28409/  | 6149  |
| 1.89E-06    | 0.0001682   | 0.000150818 | tags=38%, list=2 | 28883/28896/2  | 7427  |
| 2.98E-05    | 0.001659356 | 0.001487873 | tags=42%, list=1 | 343702/28409/  | 6994  |
| 1.88E-05    | 0.001131601 | 0.001014658 | tags=42%, list=2 | 28409/3497/35  | 8382  |
| 1.59E-05    | 0.000983456 | 0.000881823 | tags=56%, list=1 | 28883/28896/2  | 6994  |
| 8.00E-05    | 0.00369419  | 0.003312422 | tags=39%, list=1 | 28409/3497/35  | 6149  |
| 1.86E-06    | 0.000166948 | 0.000149695 | tags=27%, list=1 | 28883/28896/2  | 5751  |
| 9.29E-05    | 0.004057883 | 0.00363853  | tags=40%, list=1 | 343702/28409/  | 6994  |
| 1.00E-10    | 3.85E-08    | 3.45E-08    | tags=53%, list=2 | 343406/219437  | 8376  |
| 1.00E-10    | 3.85E-08    | 3.45E-08    | tags=53%, list=2 | 343406/219437  | 8376  |
| 0.000462437 | 0.012892415 | 0.011560077 | tags=49%, list=2 | 23581/126638/  | 7976  |
| 1.48E-05    | 0.000928001 | 0.000832099 | tags=38%, list=2 | 28773/28883/2  | 8382  |
| 1.00E-10    | 3.85E-08    | 3.45E-08    | tags=54%, list=2 | 343406/219437  | 9040  |
| 2.37E-10    | 7.36E-08    | 6.60E-08    | tags=56%, list=2 | 343406/219437  | 10065 |
| 0.00030145  | 0.009748888 | 0.008741411 | tags=34%, list=2 | 28409/3623/34  | 8382  |
| 0.000147694 | 0.005591095 | 0.005013296 | tags=51%, list=2 | 23581/337975/  | 8703  |
| 0.000453323 | 0.012726096 | 0.011410946 | tags=43%, list=2 | 28883/28896/2  | 8380  |
| 0.000596627 | 0.015168962 | 0.013601359 | tags=43%, list=2 | 28883/28896/2  | 8380  |
| 0.000883373 | 0.020347786 | 0.018244989 | tags=32%, list=1 | 55079/5047/28  | 6671  |
| 0.000430312 | 0.012337131 | 0.011062177 | tags=42%, list=2 | 23581/337975/  | 8703  |
| 0.001701106 | 0.032059313 | 0.028746214 | tags=22%, list=1 | 28883/28896/2  | 6857  |
| 0.002634331 | 0.044651078 | 0.040036712 | tags=38%, list=2 | 23581/337975/  | 8703  |
| 0.002830647 | 0.04670568  | 0.041878985 | tags=22%, list=8 | 54097/3033/11  | 2793  |
| 0.003024676 | 0.048811381 | 0.043767078 | tags=18%, list=7 | 51085/7057/11  | 2697  |
| 0.000959278 | 0.021603795 | 0.019371199 | tags=31%, list=2 | 867/8493/2303  | 7268  |
| 0.001835361 | 0.033909607 | 0.030405294 | tags=31%, list=1 | 10554/2822/88  | 5891  |
| 0.002945607 | 0.048014579 | 0.043052619 | tags=55%, list=2 | 4641/6845/228  | 9475  |
| 0.002368126 | 0.040998499 | 0.0367616   | tags=19%, list=7 | 51085/7057/11  | 2697  |
| 0.001653644 | 0.031384291 | 0.028140951 | tags=19%, list=7 | 51085/7057/11  | 2697  |
| 0.001518529 | 0.029512757 | 0.026462827 | tags=22%, list=8 | 3033/11069/77  | 2762  |
| 0.001465664 | 0.029043853 | 0.02604238  | tags=19%, list=7 | 51085/7057/11  | 2697  |
| 0.000888143 | 0.020399531 | 0.018291387 | tags=19%, list=6 | 23327/154/656  | 2194  |
| 0.000544867 | 0.014480936 | 0.012984436 | tags=33%, list=1 | 57678/54332/9  | 5804  |

|             |             |             |                                 |       |
|-------------|-------------|-------------|---------------------------------|-------|
| 0.001483345 | 0.029131024 | 0.026120543 | tags=41%, list=2 3326/1026/1076 | 8948  |
| 0.001283189 | 0.026660192 | 0.023905054 | tags=33%, list=1 57678/54332/98 | 5804  |
| 0.002954322 | 0.048059748 | 0.043093121 | tags=24%, list=1 4953/407032/36 | 4946  |
| 0.001428826 | 0.028453351 | 0.025512902 | tags=99%, list=6 6636/55692/516 | 22560 |
| 5.88E-05    | 0.002879269 | 0.002581717 | tags=44%, list=2 10105/22885/11 | 9437  |
| 0.000565598 | 0.014656592 | 0.013141939 | tags=38%, list=2 7917/10297/293 | 8178  |
| 0.000122164 | 0.004938492 | 0.004428134 | tags=21%, list=9 7049/1991/7172 | 3365  |
| 0.000309864 | 0.009829573 | 0.008813758 | tags=33%, list=1 9731/1719/4846 | 4529  |
| 0.001340315 | 0.02736456  | 0.024536631 | tags=52%, list=6 23107/51069/11 | 24280 |
| 4.81E-05    | 0.002511297 | 0.002251773 | tags=37%, list=1 26122/3054/284 | 6648  |
| 0.00250934  | 0.043044198 | 0.038595891 | tags=39%, list=2 23165/2821/299 | 7391  |
| 8.86E-05    | 0.003980163 | 0.003568842 | tags=37%, list=1 55204/27236/88 | 6824  |
| 0.001187371 | 0.025130612 | 0.022533544 | tags=30%, list=1 6095/10993/364 | 4236  |
| 3.74E-05    | 0.002029899 | 0.001820124 | tags=25%, list=1 1719/10935/484 | 4508  |
| 0.002512908 | 0.043044198 | 0.038595891 | tags=31%, list=1 9258/4779/4254 | 6080  |
| 7.33E-05    | 0.003447564 | 0.003091283 | tags=25%, list=8 4790/1645/1558 | 3053  |
| 0.001181563 | 0.025130612 | 0.022533544 | tags=41%, list=1 84612/10015/38 | 6523  |
| 0.000851689 | 0.020017174 | 0.017948544 | tags=13%, list=5 2254/6422/2732 | 1716  |
| 0.001740209 | 0.032493282 | 0.029135337 | tags=98%, list=6 24140/80324/10 | 21880 |
| 9.73E-05    | 0.004164143 | 0.003733809 | tags=31%, list=1 883/4524/20089 | 3845  |
| 8.53E-05    | 0.003873089 | 0.003472833 | tags=29%, list=1 51074/4953/884 | 5011  |
| 0.002059348 | 0.037164797 | 0.033324084 | tags=40%, list=1 9488/55062/229 | 4375  |
| 0.001319353 | 0.02708651  | 0.024287315 | tags=38%, list=1 90952/54532/68 | 6096  |
| 0.001903163 | 0.034733798 | 0.031144311 | tags=35%, list=1 653308/89869/1 | 5909  |
| 0.002892846 | 0.047441497 | 0.042538761 | tags=38%, list=1 90952/54532/68 | 6096  |
| 0.000309515 | 0.009829573 | 0.008813758 | tags=30%, list=1 183/5166/478/1 | 4202  |
| 0.00027671  | 0.00916886  | 0.008221325 | tags=55%, list=2 8724/23258/560 | 9404  |
| 3.25E-06    | 0.000265093 | 0.000237697 | tags=32%, list=1 51422/2820/842 | 6227  |
| 0.000278378 | 0.009186487 | 0.00823713  | tags=99%, list=6 24140/54938/80 | 21880 |
| 0.001038873 | 0.023011752 | 0.020633654 | tags=50%, list=2 54872/8776/529 | 9306  |
| 2.92E-05    | 0.001649606 | 0.001479131 | tags=21%, list=1 594/4524/56603 | 3754  |
| 0.00109445  | 0.023980031 | 0.021501868 | tags=38%, list=1 9818/5211/230/ | 7064  |
| 0.000728924 | 0.017487679 | 0.015680454 | tags=33%, list=1 79689/538/567/ | 5277  |
| 1.10E-05    | 0.000737923 | 0.000661664 | tags=52%, list=2 9382/51272/639 | 10138 |
| 0.000299955 | 0.00973949  | 0.008732984 | tags=26%, list=1 1571/1036/5521 | 3526  |
| 0.000473763 | 0.013117705 | 0.011762085 | tags=39%, list=1 131870/9818/52 | 7073  |
| 6.01E-05    | 0.002927712 | 0.002625155 | tags=31%, list=1 2822/57678/407 | 4300  |
| 0.00060838  | 0.015275637 | 0.013697011 | tags=21%, list=7 51109/573971/3 | 2645  |
| 0.000564769 | 0.014656592 | 0.013141939 | tags=29%, list=8 6330/254428/63 | 2882  |
| 0.000585397 | 0.014977647 | 0.013429816 | tags=39%, list=1 131870/9818/52 | 7073  |
| 0.000585397 | 0.014977647 | 0.013429816 | tags=39%, list=1 131870/9818/52 | 7073  |
| 0.000312355 | 0.009829573 | 0.008813758 | tags=26%, list=8 1645/1558/3284 | 3018  |
| 2.36E-05    | 0.001371993 | 0.001230207 | tags=43%, list=1 345778/51309/1 | 5804  |
| 0.000404548 | 0.011723205 | 0.010511696 | tags=38%, list=1 55258/23042/17 | 4730  |
| 0.000499024 | 0.013676632 | 0.012263251 | tags=33%, list=9 51474/6446/113 | 3118  |
| 0.0029738   | 0.048182705 | 0.043203371 | tags=31%, list=2 4688/114112/47 | 7149  |

|             |             |             |                                 |       |
|-------------|-------------|-------------|---------------------------------|-------|
| 5.82E-05    | 0.002867764 | 0.002571402 | tags=25%, list=1 4846/8428/3848 | 4498  |
| 0.002141825 | 0.038396136 | 0.034428173 | tags=16%, list=8 407019/6653/97 | 2932  |
| 0.00045502  | 0.012729533 | 0.011414028 | tags=35%, list=1 51493/10352/77 | 6028  |
| 2.76E-05    | 0.001574186 | 0.001411505 | tags=55%, list=2 8517/823/27244 | 9354  |
| 0.001326417 | 0.027149566 | 0.024343854 | tags=60%, list=2 22937/81562/97 | 9925  |
| 3.19E-05    | 0.001762592 | 0.001580441 | tags=32%, list=9 51660/6754/320 | 3330  |
| 8.65E-06    | 0.000617938 | 0.000554079 | tags=51%, list=2 355/27244/7486 | 7268  |
| 0.000603067 | 0.015236855 | 0.013662236 | tags=35%, list=1 361/22841/1136 | 4457  |
| 0.000147374 | 0.005591095 | 0.005013296 | tags=27%, list=1 6777/94081/92/ | 4617  |
| 0.000704676 | 0.017025448 | 0.015265991 | tags=30%, list=1 84896/3190/428 | 5291  |
| 0.001302609 | 0.026935028 | 0.024151488 | tags=39%, list=1 57678/407031/1 | 5804  |
| 0.000560175 | 0.014652754 | 0.013138498 | tags=29%, list=1 6342/406987/50 | 4165  |
| 0.001108562 | 0.024124353 | 0.021631276 | tags=34%, list=1 2896/80273/964 | 6691  |
| 0.000224493 | 0.007752269 | 0.006951128 | tags=37%, list=1 4090/9991/1432 | 4617  |
| 1.76E-05    | 0.001067482 | 0.000957166 | tags=28%, list=1 2321/9619/1385 | 4366  |
| 0.001147863 | 0.024551506 | 0.022014285 | tags=100%, list= 54938/80324/75 | 21880 |
| 0.000882398 | 0.020347786 | 0.018244989 | tags=22%, list=9 10365/687/5468 | 3262  |
| 0.000821466 | 0.019363134 | 0.017362094 | tags=34%, list=1 407032/3638/54 | 4878  |
| 0.000942318 | 0.021400669 | 0.019189064 | tags=46%, list=2 60678/1981/190 | 9525  |
| 6.01E-06    | 0.000454362 | 0.000407407 | tags=22%, list=6 9420/1645/1558 | 2027  |
| 1.32E-07    | 1.69E-05    | 1.52E-05    | tags=35%, list=1 5207/405/3479/ | 6422  |
| 9.39E-05    | 0.004060983 | 0.00364131  | tags=28%, list=1 406/3337/1027/ | 6323  |
| 0.000337168 | 0.010248131 | 0.009189061 | tags=36%, list=1 5547/4846/1355 | 4568  |
| 8.74E-05    | 0.003947358 | 0.003539427 | tags=32%, list=1 2542/56910/915 | 4300  |
| 0.001166369 | 0.024881521 | 0.022310196 | tags=15%, list=7 3050/2938/8420 | 2441  |
| 0.001834097 | 0.033909607 | 0.030405294 | tags=36%, list=2 998/221178/887 | 7217  |
| 0.000698536 | 0.017019778 | 0.015260907 | tags=27%, list=6 9619/114882/63 | 2203  |
| 0.000108624 | 0.004598034 | 0.00412286  | tags=30%, list=8 407032/5727/68 | 3053  |
| 2.21E-05    | 0.001294526 | 0.001160746 | tags=32%, list=8 2239/1645/5582 | 3066  |
| 2.07E-07    | 2.54E-05    | 2.28E-05    | tags=38%, list=1 4724/54205/561 | 7000  |
| 0.000480313 | 0.013208617 | 0.011843602 | tags=56%, list=2 6845/64083/234 | 9441  |
| 0.000593648 | 0.01514084  | 0.013576144 | tags=36%, list=8 2239/1645/2222 | 3066  |
| 0.001387989 | 0.027984759 | 0.025092736 | tags=40%, list=1 91689/10440/57 | 7103  |
| 1.92E-05    | 0.001144114 | 0.001025878 | tags=29%, list=9 9368/113235/12 | 3147  |
| 0.000135239 | 0.005333704 | 0.004782504 | tags=42%, list=2 219970/9397/68 | 7505  |
| 0.001479165 | 0.029131024 | 0.026120543 | tags=37%, list=1 79689/538/567/ | 5277  |
| 0.000325184 | 0.010091993 | 0.009049059 | tags=40%, list=1 1977/546/38772 | 6949  |
| 2.37E-06    | 0.000201616 | 0.00018078  | tags=17%, list=2 2220/922/3078/ | 618   |
| 0.000698895 | 0.017019778 | 0.015260907 | tags=15%, list=5 55966/634/2043 | 1763  |
| 1.99E-06    | 0.000175035 | 0.000156947 | tags=28%, list=1 4846/3848/2312 | 4498  |
| 6.36E-05    | 0.003061333 | 0.002744967 | tags=35%, list=8 2239/1645/5582 | 3066  |
| 9.35E-05    | 0.004060983 | 0.00364131  | tags=30%, list=1 119391/538/124 | 5206  |
| 7.31E-05    | 0.003447564 | 0.003091283 | tags=36%, list=8 2239/1645/5582 | 3066  |
| 0.000520078 | 0.013969533 | 0.012525883 | tags=44%, list=1 1837/55970/838 | 6338  |
| 0.001408151 | 0.028180445 | 0.025268199 | tags=48%, list=2 3326/2060/5071 | 8948  |
| 2.51E-05    | 0.0014478   | 0.00129818  | tags=40%, list=1 529/55862/6832 | 5558  |

|             |             |             |                                 |      |
|-------------|-------------|-------------|---------------------------------|------|
| 0.000226302 | 0.007752269 | 0.006951128 | tags=40%, list=1 529/6833/10928 | 5558 |
| 2.64E-07    | 3.19E-05    | 2.86E-05    | tags=33%, list=1 23205/3155/848 | 4394 |
| 1.45E-06    | 0.000136399 | 0.000122303 | tags=31%, list=1 4023/9619/6092 | 4397 |
| 3.18E-06    | 0.000264746 | 0.000237386 | tags=48%, list=2 5162/4928/4195 | 7762 |
| 5.24E-05    | 0.00264815  | 0.002374483 | tags=35%, list=9 51474/6446/113 | 3344 |
| 9.07E-05    | 0.003995701 | 0.003582775 | tags=47%, list=2 6811/11337/664 | 8980 |
| 7.47E-05    | 0.003492782 | 0.003131828 | tags=11%, list=3 6812/2153/1950 | 1048 |
| 0.000651014 | 0.016195227 | 0.014521568 | tags=49%, list=2 57805/23511/31 | 9379 |
| 0.002923423 | 0.047749248 | 0.042814709 | tags=37%, list=1 3192/8202/6924 | 7040 |
| 0.002923423 | 0.047749248 | 0.042814709 | tags=37%, list=1 3192/8202/6924 | 7040 |
| 2.24E-06    | 0.000194952 | 0.000174805 | tags=24%, list=1 3482/3249/5914 | 3677 |
| 0.002701742 | 0.04513138  | 0.040467378 | tags=42%, list=1 4088/5747/3871 | 4761 |
| 0.002701742 | 0.04513138  | 0.040467378 | tags=42%, list=1 4088/5747/3871 | 4761 |
| 0.002701742 | 0.04513138  | 0.040467378 | tags=42%, list=1 4088/5747/3871 | 4761 |
| 0.002999241 | 0.048497726 | 0.043485836 | tags=58%, list=2 1386/284058/57 | 9351 |
| 2.70E-06    | 0.000227185 | 0.000203707 | tags=24%, list=1 3482/3249/5914 | 3677 |
| 2.19E-08    | 3.69E-06    | 3.31E-06    | tags=38%, list=1 653308/89869/1 | 5909 |
| 1.51E-06    | 0.000140649 | 0.000126114 | tags=51%, list=2 6720/355/27244 | 9327 |
| 1.10E-05    | 0.000737923 | 0.000661664 | tags=32%, list=1 406987/50640/2 | 4060 |
| 0.000312243 | 0.009829573 | 0.008813758 | tags=23%, list=6 9619/1389/3949 | 2060 |
| 0.002421908 | 0.041840017 | 0.037516154 | tags=45%, list=1 5927/8864/3192 | 7040 |
| 3.99E-09    | 8.50E-07    | 7.62E-07    | tags=28%, list=1 9965/2222/3156 | 3767 |
| 0.002185385 | 0.038662659 | 0.034667152 | tags=39%, list=1 2806/1491/2744 | 6088 |
| 0.000206633 | 0.007283466 | 0.006530773 | tags=52%, list=2 23369/1981/560 | 9520 |
| 1.28E-07    | 1.66E-05    | 1.49E-05    | tags=34%, list=1 55258/3638/234 | 4730 |
| 3.50E-05    | 0.001912741 | 0.001715073 | tags=47%, list=1 8402/230/10776 | 6982 |
| 0.000114907 | 0.004788778 | 0.004293892 | tags=28%, list=8 254428/1183/29 | 2858 |
| 0.002602117 | 0.044197717 | 0.039630202 | tags=45%, list=1 4301/7124/8461 | 6523 |
| 1.92E-10    | 6.20E-08    | 5.56E-08    | tags=36%, list=1 2581/3949/6342 | 4228 |
| 1.00E-10    | 3.85E-08    | 3.45E-08    | tags=51%, list=2 4338/10327/273 | 8544 |
| 0.0002695   | 0.008966694 | 0.008040051 | tags=28%, list=8 4129/6531/5702 | 2988 |
| 5.90E-10    | 1.44E-07    | 1.30E-07    | tags=32%, list=8 6506/345274/64 | 2741 |
| 1.00E-10    | 3.85E-08    | 3.45E-08    | tags=32%, list=8 254428/26503/1 | 2858 |
| 1.00E-10    | 3.85E-08    | 3.45E-08    | tags=33%, list=8 254428/26503/1 | 2858 |
| 1.00E-10    | 3.85E-08    | 3.45E-08    | tags=35%, list=1 55258/3638/234 | 4730 |
| 0.001418226 | 0.028311987 | 0.025386148 | tags=42%, list=1 3192/8202/1231 | 7040 |
| 1.56E-05    | 0.000970517 | 0.000870221 | tags=21%, list=7 51109/573971/3 | 2645 |
| 0.001989351 | 0.036062559 | 0.032335754 | tags=27%, list=8 4790/407019/54 | 3053 |
| 0.000187074 | 0.006772593 | 0.006072695 | tags=47%, list=2 11337/665/5760 | 8927 |
| 0.000187074 | 0.006772593 | 0.006072695 | tags=47%, list=2 11337/665/5760 | 8927 |
| 0.002850885 | 0.046943792 | 0.04209249  | tags=48%, list=2 2074/6924/5828 | 8463 |
| 6.56E-08    | 9.82E-06    | 8.81E-06    | tags=30%, list=6 6568/23428/108 | 2072 |
| 6.56E-08    | 9.82E-06    | 8.81E-06    | tags=30%, list=6 6568/23428/108 | 2072 |
| 8.71E-06    | 0.000617938 | 0.000554079 | tags=38%, list=8 57210/26503/64 | 2979 |
| 0.000117046 | 0.004803649 | 0.004307227 | tags=42%, list=1 2806/1491/2744 | 6088 |
| 6.56E-06    | 0.000490935 | 0.000440201 | tags=31%, list=9 9420/1645/1558 | 3158 |

|             |             |             |                                 |       |
|-------------|-------------|-------------|---------------------------------|-------|
| 8.05E-07    | 7.94E-05    | 7.12E-05    | tags=41%, list=1 57678/407031/1 | 5804  |
| 0.001673584 | 0.031614316 | 0.028347205 | tags=20%, list=6 406959/9104/5  | 2060  |
| 5.54E-05    | 0.002767237 | 0.002481263 | tags=49%, list=1 8402/230/1077  | 6982  |
| 1.39E-06    | 0.000133411 | 0.000119624 | tags=20%, list=4 7450/7057/271  | 1613  |
| 0.002723457 | 0.045213863 | 0.040541337 | tags=49%, list=2 2821/3945/521  | 7341  |
| 0.001051757 | 0.023233495 | 0.020832481 | tags=40%, list=1 57678/407031/1 | 5804  |
| 0.000192887 | 0.00687001  | 0.006160044 | tags=50%, list=1 8402/230/1077  | 6982  |
| 3.40E-08    | 5.39E-06    | 4.83E-06    | tags=36%, list=8 57210/26503/6  | 2979  |
| 0.002258616 | 0.039697634 | 0.035595171 | tags=40%, list=1 285172/200576  | 5758  |
| 0.001446943 | 0.028743331 | 0.025772916 | tags=41%, list=7 55258/9731/48  | 2469  |
| 0.000348137 | 0.010386287 | 0.009312939 | tags=31%, list=5 4846/3848/231  | 1763  |
| 5.08E-06    | 0.000391195 | 0.000350768 | tags=37%, list=1 1203/55647/91  | 5140  |
| 5.80E-05    | 0.002867764 | 0.002571402 | tags=54%, list=2 7384/4697/158  | 8528  |
| 5.08E-06    | 0.000391195 | 0.000350768 | tags=30%, list=1 10998/1571/32  | 3630  |
| 1.00E-10    | 3.85E-08    | 3.45E-08    | tags=30%, list=8 286/254428/36  | 2903  |
| 0.000705445 | 0.017025448 | 0.015265991 | tags=61%, list=2 3257/950/8431  | 9300  |
| 0.000705445 | 0.017025448 | 0.015265991 | tags=61%, list=2 3257/950/8431  | 9300  |
| 1.51E-08    | 2.78E-06    | 2.50E-06    | tags=54%, list=2 4338/10327/27  | 8544  |
| 9.73E-08    | 1.31E-05    | 1.18E-05    | tags=26%, list=8 6653/392636/2  | 2837  |
| 0.001129808 | 0.024358671 | 0.021841378 | tags=65%, list=3 84678/6045/55  | 11161 |
| 1.47E-07    | 1.85E-05    | 1.66E-05    | tags=28%, list=8 139189/6622/6  | 3077  |
| 3.11E-10    | 8.65E-08    | 7.76E-08    | tags=32%, list=1 1571/1036/882  | 3526  |
| 7.18E-08    | 1.04E-05    | 9.29E-06    | tags=32%, list=7 9619/114882/2  | 2731  |
| 3.71E-07    | 4.35E-05    | 3.90E-05    | tags=37%, list=1 650/84869/284  | 4218  |
| 0.002000292 | 0.036179774 | 0.032440856 | tags=24%, list=8 6653/7067/234  | 2837  |
| 6.55E-05    | 0.003131466 | 0.002807852 | tags=42%, list=8 6531/6506/345  | 2763  |
| 0.000864276 | 0.020079516 | 0.018004443 | tags=32%, list=7 3050/128/2728  | 2441  |
| 0.000809302 | 0.01913218  | 0.017155008 | tags=48%, list=2 113251/1656/5  | 8564  |
| 0.000986957 | 0.02204295  | 0.019764971 | tags=40%, list=1 200895/501/55  | 3694  |
| 0.000332353 | 0.010195423 | 0.0091418   | tags=49%, list=1 216/2806/2600  | 6155  |
| 0.001350148 | 0.02736456  | 0.024536631 | tags=43%, list=1 529/538/9114/5 | 5184  |
| 0.00034715  | 0.010386287 | 0.009312939 | tags=13%, list=2 2153/1950/534  | 745   |
| 3.30E-06    | 0.000266428 | 0.000238895 | tags=24%, list=8 407019/406977  | 2932  |
| 0.000685425 | 0.016792922 | 0.015057495 | tags=36%, list=1 55788/1355/17  | 4024  |
| 0.000116288 | 0.004796861 | 0.00430114  | tags=44%, list=1 91689/10440/1  | 7103  |
| 0.000618937 | 0.015492592 | 0.013891545 | tags=42%, list=1 538/9114/5160  | 5184  |
| 0.000293152 | 0.009557001 | 0.008569354 | tags=73%, list=2 2890/3134/234  | 9925  |
| 2.25E-08    | 3.72E-06    | 3.33E-06    | tags=26%, list=8 1558/6392/156  | 2962  |
| 0.001022231 | 0.022767882 | 0.020414986 | tags=66%, list=2 9550/79641/23  | 8610  |
| 9.85E-06    | 0.000692216 | 0.000620681 | tags=38%, list=1 1203/55647/91  | 5140  |
| 1.00E-10    | 3.85E-08    | 3.45E-08    | tags=43%, list=1 163404/30/228  | 5888  |
| 0.0008722   | 0.020205554 | 0.018117456 | tags=43%, list=1 23475/57017/8  | 6632  |
| 1.89E-10    | 6.20E-08    | 5.56E-08    | tags=36%, list=1 3953/8578/32/2 | 5166  |
| 0.001117986 | 0.024233023 | 0.021728715 | tags=44%, list=1 1717/7881/232  | 5687  |
| 2.72E-08    | 4.40E-06    | 3.94E-06    | tags=36%, list=1 1571/1036/882  | 3526  |
| 0.000115587 | 0.004792406 | 0.004297146 | tags=45%, list=1 91689/10440/1  | 7103  |

|             |             |             |                                 |       |
|-------------|-------------|-------------|---------------------------------|-------|
| 0.001715328 | 0.032252147 | 0.02891912  | tags=47%, list=2 1385/8864/988/ | 7657  |
| 4.85E-06    | 0.000380523 | 0.000341199 | tags=35%, list=8 1645/55825/222 | 3018  |
| 0.000578566 | 0.014897141 | 0.013357629 | tags=48%, list=1 8720/7108/5562 | 5804  |
| 0.000578566 | 0.014897141 | 0.013357629 | tags=48%, list=1 8720/7108/5562 | 5804  |
| 1.09E-05    | 0.000737923 | 0.000661664 | tags=24%, list=4 2039/7099/7057 | 1574  |
| 4.91E-08    | 7.63E-06    | 6.85E-06    | tags=38%, list=1 650/84869/2842 | 4218  |
| 1.77E-06    | 0.000160625 | 0.000144026 | tags=37%, list=1 9619/6095/1148 | 4300  |
| 5.29E-09    | 1.04E-06    | 9.35E-07    | tags=38%, list=1 55066/10157/54 | 4652  |
| 5.29E-09    | 1.04E-06    | 9.35E-07    | tags=38%, list=1 55066/10157/54 | 4652  |
| 5.29E-09    | 1.04E-06    | 9.35E-07    | tags=38%, list=1 55066/10157/54 | 4652  |
| 0.001407026 | 0.028180445 | 0.025268199 | tags=49%, list=1 594/501/55711/ | 3754  |
| 1.55E-06    | 0.000142454 | 0.000127732 | tags=46%, list=1 6389/3418/8801 | 5250  |
| 5.83E-07    | 6.29E-05    | 5.64E-05    | tags=61%, list=2 55763/23041/58 | 8997  |
| 2.68E-09    | 6.20E-07    | 5.56E-07    | tags=28%, list=8 3046/9420/1558 | 2962  |
| 0.000131257 | 0.005227644 | 0.004687405 | tags=62%, list=2 6845/64083/557 | 9441  |
| 6.99E-06    | 0.000509298 | 0.000456666 | tags=23%, list=4 2039/7099/7057 | 1574  |
| 4.93E-05    | 0.002535332 | 0.002273324 | tags=24%, list=8 2039/7099/4069 | 2955  |
| 2.96E-09    | 6.65E-07    | 5.96E-07    | tags=30%, list=8 4129/1558/5860 | 2988  |
| 0.000126533 | 0.005064449 | 0.004541075 | tags=39%, list=9 3046/728441/28 | 3258  |
| 1.01E-06    | 9.82E-05    | 8.81E-05    | tags=41%, list=1 1203/55647/911 | 4130  |
| 0.00107527  | 0.023688163 | 0.021240162 | tags=61%, list=2 2639/84245/511 | 7818  |
| 0.001776182 | 0.033088558 | 0.029669095 | tags=41%, list=8 1565/51109/124 | 2836  |
| 7.48E-07    | 7.60E-05    | 6.82E-05    | tags=25%, list=6 3991/128486/91 | 2105  |
| 0.001375325 | 0.027798765 | 0.024925963 | tags=38%, list=1 2820/26007/801 | 6215  |
| 7.19E-06    | 0.000518863 | 0.000465242 | tags=24%, list=4 2039/7099/7057 | 1574  |
| 0.00052764  | 0.014125735 | 0.012665942 | tags=20%, list=4 634/84830/18/5 | 1553  |
| 2.32E-06    | 0.000199692 | 0.000179055 | tags=42%, list=1 51463/529/1202 | 5561  |
| 0.001140846 | 0.024466148 | 0.021937749 | tags=38%, list=1 518/529/9114/5 | 5696  |
| 9.04E-08    | 1.24E-05    | 1.11E-05    | tags=36%, list=1 407015/23411/9 | 4658  |
| 2.03E-08    | 3.49E-06    | 3.13E-06    | tags=35%, list=8 3658/48/1645/4 | 3079  |
| 1.03E-05    | 0.000721237 | 0.000646702 | tags=62%, list=1 10478/207/2639 | 4165  |
| 0.002363829 | 0.040998499 | 0.0367616   | tags=60%, list=2 91392/9218/259 | 9362  |
| 0.002363829 | 0.040998499 | 0.0367616   | tags=60%, list=2 91392/9218/259 | 9362  |
| 0.002363829 | 0.040998499 | 0.0367616   | tags=60%, list=2 91392/9218/259 | 9362  |
| 6.94E-05    | 0.003300054 | 0.002959017 | tags=27%, list=8 6653/8605/2160 | 2837  |
| 0.002275465 | 0.039907008 | 0.035782908 | tags=31%, list=7 253512/80736/1 | 2411  |
| 7.46E-07    | 7.60E-05    | 6.82E-05    | tags=36%, list=1 407015/23411/9 | 4658  |
| 0.000119447 | 0.004852898 | 0.004351386 | tags=29%, list=1 9619/6095/1148 | 4300  |
| 4.85E-05    | 0.002512353 | 0.002252719 | tags=28%, list=9 29116/407019/4 | 3223  |
| 0.000397761 | 0.011567975 | 0.010372509 | tags=43%, list=1 11212/55258/22 | 4851  |
| 0.000397761 | 0.011567975 | 0.010372509 | tags=43%, list=1 11212/55258/22 | 4851  |
| 1.12E-07    | 1.49E-05    | 1.33E-05    | tags=55%, list=1 2475/1432/2340 | 6767  |
| 9.61E-05    | 0.004133157 | 0.003706025 | tags=20%, list=4 634/84830/18/5 | 1553  |
| 0.000676463 | 0.0167254   | 0.014996951 | tags=76%, list=2 64121/9451/561 | 10466 |
| 0.002690364 | 0.04513138  | 0.040467378 | tags=65%, list=2 23258/163486/2 | 9346  |
| 1.73E-08    | 3.04E-06    | 2.72E-06    | tags=56%, list=1 2475/1432/2340 | 6767  |



|             |             |             |                                  |       |
|-------------|-------------|-------------|----------------------------------|-------|
| 0.000235701 | 0.008006885 | 0.007179431 | tags=21%, list=4 634/84830/18/5  | 1553  |
| 0.002156544 | 0.038404542 | 0.03443571  | tags=55%, list=2 7529/8994/6788  | 8402  |
| 1.00E-10    | 3.85E-08    | 3.45E-08    | tags=42%, list=1 51074/26227/49  | 5011  |
| 5.86E-06    | 0.000447035 | 0.000400837 | tags=31%, list=8 3482/8013/7049  | 2739  |
| 0.000257139 | 0.008590771 | 0.007702977 | tags=61%, list=2 2639/5162/1097  | 7818  |
| 0.000257139 | 0.008590771 | 0.007702977 | tags=61%, list=2 2639/5162/1097  | 7818  |
| 1.26E-05    | 0.000807336 | 0.000723904 | tags=54%, list=2 55229/2639/5162 | 7832  |
| 1.26E-05    | 0.000807336 | 0.000723904 | tags=54%, list=2 55229/2639/5162 | 7832  |
| 1.26E-05    | 0.000807336 | 0.000723904 | tags=54%, list=2 55229/2639/5162 | 7832  |
| 0.000554691 | 0.014560635 | 0.013055898 | tags=40%, list=1 9619/3949/6342  | 4300  |
| 0.002205436 | 0.038932199 | 0.034908838 | tags=70%, list=2 1024/400569/98  | 10750 |
| 0.001845092 | 0.033909607 | 0.030405294 | tags=41%, list=1 84105/1719/883  | 4508  |
| 0.001845092 | 0.033909607 | 0.030405294 | tags=15%, list=7 406977/5465/40  | 2695  |
| 0.000141219 | 0.005436942 | 0.004875074 | tags=67%, list=2 9550/79641/233  | 8610  |
| 0.00139809  | 0.028118308 | 0.025212484 | tags=40%, list=1 8801/23205/844  | 5074  |
| 0.000141219 | 0.005436942 | 0.004875074 | tags=35%, list=1 4953/23042/314  | 4946  |
| 0.000211366 | 0.007397803 | 0.006633293 | tags=30%, list=6 27284/1593/513  | 2161  |
| 0.00128602  | 0.026660192 | 0.023905054 | tags=31%, list=1 1824/1832/287/  | 3606  |
| 1.00E-10    | 3.85E-08    | 3.45E-08    | tags=37%, list=1 3953/8578/32/2  | 5166  |
| 0.001033597 | 0.022957778 | 0.020585257 | tags=31%, list=8 6653/8228/3991  | 2837  |
| 1.90E-05    | 0.001137723 | 0.001020147 | tags=67%, list=2 9382/6399/2334  | 9580  |
| 1.00E-10    | 3.85E-08    | 3.45E-08    | tags=37%, list=1 3953/8578/32/3  | 5166  |
| 4.95E-05    | 0.002535332 | 0.002273324 | tags=39%, list=8 5727/407015/23  | 3053  |
| 0.001308346 | 0.026984636 | 0.024195969 | tags=35%, list=5 5144/845/801/6  | 1759  |
| 0.000317103 | 0.009929495 | 0.008903354 | tags=27%, list=0 9619/114882/63  | 144   |
| 4.51E-05    | 0.002368514 | 0.002123745 | tags=40%, list=8 5727/407015/23  | 3053  |
| 0.0005123   | 0.013899151 | 0.012462774 | tags=44%, list=1 2822/57678/966  | 5838  |
| 0.0005123   | 0.013899151 | 0.012462774 | tags=44%, list=1 2822/57678/966  | 5838  |
| 6.09E-07    | 6.48E-05    | 5.81E-05    | tags=48%, list=1 80724/25821/79  | 5464  |
| 1.94E-07    | 2.41E-05    | 2.16E-05    | tags=44%, list=1 7108/403313/54  | 6688  |
| 0.001203135 | 0.025397781 | 0.022773104 | tags=23%, list=7 80014/406977/4  | 2695  |
| 1.45E-06    | 0.000136399 | 0.000122303 | tags=31%, list=7 2729/58510/104  | 2450  |
| 3.20E-05    | 0.001762592 | 0.001580441 | tags=29%, list=8 2039/7099/4069  | 2955  |
| 1.34E-09    | 3.19E-07    | 2.86E-07    | tags=38%, list=9 51474/9368/113  | 3344  |
| 0.00112833  | 0.024358671 | 0.021841378 | tags=44%, list=1 2822/57678/966  | 5838  |
| 0.001186868 | 0.025130612 | 0.022533544 | tags=16%, list=7 406977/5465/40  | 2695  |
| 0.003113709 | 0.049850168 | 0.044698514 | tags=39%, list=7 292/57835/1086  | 2440  |
| 0.003113709 | 0.049850168 | 0.044698514 | tags=39%, list=7 292/57835/1086  | 2440  |
| 5.77E-09    | 1.11E-06    | 9.96E-07    | tags=42%, list=1 9969/64240/407  | 5161  |
| 1.69E-08    | 3.03E-06    | 2.72E-06    | tags=42%, list=1 9969/64240/407  | 5161  |
| 0.000412017 | 0.011896719 | 0.010667279 | tags=57%, list=1 51540/63826/27  | 6751  |
| 0.000628004 | 0.015671015 | 0.014051529 | tags=62%, list=2 80853/22992/23  | 7956  |
| 0.00015324  | 0.005683235 | 0.005095914 | tags=43%, list=5 200931/634/594  | 1677  |
| 0.000332912 | 0.010195423 | 0.0091418   | tags=28%, list=1 26207/1071/500  | 3770  |
| 6.73E-08    | 9.89E-06    | 8.87E-06    | tags=39%, list=1 57678/407031/1  | 5804  |
| 1.00E-10    | 3.85E-08    | 3.45E-08    | tags=50%, list=1 6342/23600/519  | 4165  |

|             |             |             |                                 |       |
|-------------|-------------|-------------|---------------------------------|-------|
| 0.000118032 | 0.004819645 | 0.004321569 | tags=73%, list=3 9776/7249/947  | 11236 |
| 0.000334679 | 0.010210855 | 0.009155637 | tags=31%, list=4 3043/58157/15  | 1603  |
| 0.001658503 | 0.031402797 | 0.028157545 | tags=48%, list=1 529/9114/5160  | 5558  |
| 0.000467824 | 0.012997777 | 0.011654551 | tags=56%, list=1 2806/2744/137  | 4678  |
| 0.000183546 | 0.006745331 | 0.00604825  | tags=48%, list=1 79068/30812/8  | 5499  |
| 1.22E-05    | 0.000804973 | 0.000721785 | tags=57%, list=2 6716/28976/26  | 7851  |
| 0.000533331 | 0.014230949 | 0.012760283 | tags=49%, list=1 6527/66035/57  | 3820  |
| 5.58E-07    | 6.10E-05    | 5.47E-05    | tags=40%, list=1 57678/407031/1 | 5804  |
| 0.000863059 | 0.020079516 | 0.018004443 | tags=69%, list=2 4924/3123/311  | 10041 |
| 0.002082189 | 0.037410004 | 0.03354395  | tags=23%, list=7 406977/5465/7  | 2695  |
| 0.002082189 | 0.037410004 | 0.03354395  | tags=23%, list=7 406977/5465/7  | 2695  |
| 0.000109458 | 0.0046092   | 0.004132873 | tags=23%, list=4 3990/55937/18  | 1333  |
| 0.000105651 | 0.004495715 | 0.004031115 | tags=59%, list=2 10981/23682/2  | 7707  |
| 6.91E-06    | 0.000507727 | 0.000455257 | tags=53%, list=1 8799/5830/848  | 6200  |
| 6.91E-06    | 0.000507727 | 0.000455257 | tags=53%, list=1 8799/5830/848  | 6200  |
| 0.000280434 | 0.009216688 | 0.00826421  | tags=18%, list=2 729/3078/731/7 | 886   |
| 0.00051797  | 0.013959304 | 0.012516711 | tags=51%, list=1 51004/2329/48  | 4786  |
| 0.001883952 | 0.034539111 | 0.030969744 | tags=50%, list=1 8801/23205/84  | 5074  |
| 9.09E-05    | 0.003995701 | 0.003582775 | tags=35%, list=8 6653/2166/822  | 2837  |
| 9.09E-05    | 0.003995701 | 0.003582775 | tags=35%, list=8 6653/2166/822  | 2837  |
| 8.45E-05    | 0.003857641 | 0.003458982 | tags=23%, list=4 3990/55937/18  | 1333  |
| 0.002888719 | 0.047441497 | 0.042538761 | tags=17%, list=5 9472/55151/79  | 1759  |
| 0.003072912 | 0.049392636 | 0.044288264 | tags=24%, list=3 866/653/3291/1 | 958   |
| 0.000140799 | 0.005436942 | 0.004875074 | tags=39%, list=1 22/55640/5578  | 4561  |
| 4.55E-10    | 1.15E-07    | 1.03E-07    | tags=46%, list=1 284486/32/880  | 5192  |
| 4.55E-10    | 1.15E-07    | 1.03E-07    | tags=46%, list=1 284486/32/880  | 5192  |
| 0.000241075 | 0.008121212 | 0.007281943 | tags=30%, list=8 4790/407019/7  | 3053  |
| 0.000111769 | 0.004682157 | 0.00419829  | tags=76%, list=2 64121/9451/56  | 10466 |
| 0.000134808 | 0.005333704 | 0.004782504 | tags=63%, list=2 8724/5604/259  | 9404  |
| 1.11E-10    | 4.07E-08    | 3.65E-08    | tags=46%, list=1 6342/23600/51  | 4165  |
| 0.000326518 | 0.010091993 | 0.009049059 | tags=32%, list=5 1593/51302/15  | 1786  |
| 0.001584121 | 0.030349797 | 0.027213365 | tags=29%, list=1 10142/287/972  | 3844  |
| 1.44E-05    | 0.000912333 | 0.00081805  | tags=26%, list=3 407019/100126  | 1185  |
| 1.18E-05    | 0.000782048 | 0.000701229 | tags=45%, list=5 9122/347411/6  | 1851  |
| 0.000362892 | 0.010707955 | 0.009601366 | tags=26%, list=4 3990/55937/40  | 1333  |
| 8.93E-05    | 0.003988074 | 0.003575935 | tags=38%, list=6 57835/10861/8  | 2370  |
| 0.000855928 | 0.02002315  | 0.017953902 | tags=42%, list=1 669/6886/1036  | 4006  |
| 0.000224532 | 0.007752269 | 0.006951128 | tags=27%, list=4 3990/55937/40  | 1333  |
| 0.000224532 | 0.007752269 | 0.006951128 | tags=27%, list=4 3990/55937/40  | 1333  |
| 0.000187792 | 0.006772593 | 0.006072695 | tags=66%, list=2 8724/5604/259  | 9404  |
| 0.002550662 | 0.04350654  | 0.039010454 | tags=62%, list=2 11127/23299/9  | 9324  |
| 0.001983837 | 0.036043418 | 0.032318592 | tags=29%, list=1 10142/287/972  | 3844  |
| 0.002297183 | 0.040200707 | 0.036046255 | tags=35%, list=4 3990/55937/54  | 1333  |
| 1.00E-10    | 3.85E-08    | 3.45E-08    | tags=53%, list=1 8799/83752/58  | 6200  |
| 1.00E-10    | 3.85E-08    | 3.45E-08    | tags=53%, list=1 8799/83752/58  | 6200  |
| 0.001349014 | 0.02736456  | 0.024536631 | tags=44%, list=1 3155/6342/797  | 4359  |

|             |             |             |                                 |       |
|-------------|-------------|-------------|---------------------------------|-------|
| 0.00223094  | 0.039296625 | 0.035235603 | tags=30%, list=7 338328/5125/2  | 2592  |
| 0.001231069 | 0.025852442 | 0.023180779 | tags=63%, list=1 2806/2744/1378 | 6088  |
| 0.001083637 | 0.023807626 | 0.02134728  | tags=59%, list=1 94081/27430/1  | 4570  |
| 0.001620788 | 0.030833099 | 0.027646721 | tags=58%, list=9 5337/5911/9368 | 3147  |
| 0.001726859 | 0.032393625 | 0.029045978 | tags=58%, list=1 5469/4005/2629 | 5792  |
| 0.00160012  | 0.030583862 | 0.027423241 | tags=58%, list=1 1153/132864/2  | 5967  |
| 0.001542991 | 0.029734317 | 0.02666149  | tags=54%, list=5 5581/51084/66  | 1948  |
| 0.001542991 | 0.029734317 | 0.02666149  | tags=54%, list=5 5581/51084/66  | 1948  |
| 2.83E-07    | 3.37E-05    | 3.02E-05    | tags=61%, list=1 4723/23409/216 | 6656  |
| 0.000561825 | 0.014652754 | 0.013138498 | tags=46%, list=1 125061/23498/8 | 4747  |
| 0.002970939 | 0.048182705 | 0.043203371 | tags=26%, list=0 2150/117854/28 | 144   |
| 0.000759289 | 0.018055452 | 0.016189551 | tags=22%, list=2 2155/2160/350/ | 601   |
| 0.000759289 | 0.018055452 | 0.016189551 | tags=22%, list=2 2155/2160/350/ | 601   |
| 1.00E-10    | 3.85E-08    | 3.45E-08    | tags=53%, list=1 125061/7263/5  | 4747  |
| 0.002582587 | 0.043958343 | 0.039415566 | tags=53%, list=1 1719/4524/2008 | 4508  |
| 0.000327038 | 0.010091993 | 0.009049059 | tags=35%, list=1 9619/114882/10 | 4300  |
| 0.001109989 | 0.024124353 | 0.021631276 | tags=87%, list=3 114971/5728/36 | 11079 |
| 0.000546492 | 0.014480936 | 0.012984436 | tags=19%, list=3 55937/336/335/ | 1185  |
| 0.00094727  | 0.021452869 | 0.01923587  | tags=48%, list=1 2308/9686/2296 | 6527  |
| 0.002154971 | 0.038404542 | 0.03443571  | tags=82%, list=3 57154/9776/724 | 11645 |
| 0.000207198 | 0.007283466 | 0.006530773 | tags=19%, list=3 55937/6456/336 | 1185  |
| 0.000153196 | 0.005683235 | 0.005095914 | tags=58%, list=2 2639/84945/55  | 7818  |
| 1.00E-10    | 3.85E-08    | 3.45E-08    | tags=54%, list=1 125061/55258/2 | 4747  |
| 0.000600701 | 0.015224655 | 0.013651297 | tags=56%, list=1 1359/2150/183/ | 4386  |
| 0.000449618 | 0.012666061 | 0.011357115 | tags=38%, list=1 1571/1558/156  | 3526  |
| 0.001845421 | 0.033909607 | 0.030405294 | tags=68%, list=2 55669/115209/  | 8800  |
| 0.002471902 | 0.042612637 | 0.038208929 | tags=52%, list=1 54332/9804/51  | 5783  |
| 2.94E-05    | 0.001649606 | 0.001479131 | tags=50%, list=9 51474/113235/  | 3344  |
| 0.000510423 | 0.013899151 | 0.012462774 | tags=24%, list=3 162540/643847  | 1008  |
| 0.000147025 | 0.005591095 | 0.005013296 | tags=33%, list=6 406959/2246/10 | 2060  |
| 0.000377098 | 0.011086671 | 0.009940944 | tags=34%, list=4 3990/55937/18  | 1333  |
| 0.000227246 | 0.007752269 | 0.006951128 | tags=36%, list=4 3990/55937/18  | 1333  |
| 0.000227246 | 0.007752269 | 0.006951128 | tags=36%, list=4 3990/55937/18  | 1333  |
| 0.001107733 | 0.024124353 | 0.021631276 | tags=55%, list=1 64423/55737/2  | 5933  |
| 0.002716008 | 0.04518297  | 0.040513636 | tags=41%, list=4 4023/4040/3990 | 1333  |
| 0.002716008 | 0.04518297  | 0.040513636 | tags=35%, list=1 948/1056/64241 | 285   |
| 5.07E-05    | 0.002576672 | 0.002310391 | tags=53%, list=1 23411/6342/236 | 4165  |
| 0.00020256  | 0.00718288  | 0.006440581 | tags=37%, list=8 2039/7099/705  | 2955  |
| 0.000516775 | 0.013959304 | 0.012516711 | tags=25%, list=3 162540/643847  | 1008  |
| 7.82E-07    | 7.81E-05    | 7.00E-05    | tags=47%, list=1 6342/23600/996 | 4165  |
| 0.00012307  | 0.004950369 | 0.004438784 | tags=54%, list=1 529/55647/9114 | 5558  |
| 1.00E-10    | 3.85E-08    | 3.45E-08    | tags=61%, list=2 196743/5192/26 | 7275  |
| 0.000189314 | 0.006772593 | 0.006072695 | tags=38%, list=8 2039/7099/705  | 2955  |
| 0.000189314 | 0.006772593 | 0.006072695 | tags=38%, list=8 2039/7099/705  | 2955  |
| 0.000681231 | 0.0167409   | 0.015010849 | tags=59%, list=1 529/9114/51606 | 5558  |
| 0.000681231 | 0.0167409   | 0.015010849 | tags=59%, list=1 529/9114/51606 | 5558  |

|             |             |             |                                 |      |
|-------------|-------------|-------------|---------------------------------|------|
| 0.002813025 | 0.046509833 | 0.041703377 | tags=55%, list=1 5562/5660/2629 | 6331 |
| 0.000413479 | 0.011896719 | 0.010667279 | tags=57%, list=1 10157/10993/50 | 4600 |
| 1.90E-10    | 6.20E-08    | 5.56E-08    | tags=64%, list=2 196743/5192/20 | 7275 |
| 3.21E-10    | 8.65E-08    | 7.76E-08    | tags=65%, list=2 196743/5192/20 | 7275 |
| 3.21E-10    | 8.65E-08    | 7.76E-08    | tags=65%, list=2 196743/5192/20 | 7275 |
| 3.21E-10    | 8.65E-08    | 7.76E-08    | tags=65%, list=2 196743/5192/20 | 7275 |
| 0.000361434 | 0.010703996 | 0.009597815 | tags=83%, list=2 3123/3115/3108 | 9634 |
| 0.000152423 | 0.005683235 | 0.005095914 | tags=50%, list=1 9114/51606/534 | 5048 |
| 0.000668158 | 0.016570724 | 0.014858259 | tags=37%, list=8 79068/8846/154 | 2962 |
| 0.001619529 | 0.030833099 | 0.027646721 | tags=41%, list=1 1182/1185/1181 | 3686 |
| 0.000308221 | 0.009829573 | 0.008813758 | tags=46%, list=8 4790/407019/10 | 3053 |
| 0.000308221 | 0.009829573 | 0.008813758 | tags=46%, list=8 4790/407019/10 | 3053 |
| 0.001537007 | 0.029734317 | 0.02666149  | tags=65%, list=1 11345/22906/21 | 6784 |
| 4.64E-06    | 0.000368161 | 0.000330115 | tags=35%, list=1 9619/664/9325/ | 4300 |
| 2.61E-05    | 0.001496388 | 0.001341747 | tags=52%, list=1 1352/644/4779/ | 3976 |
| 4.44E-06    | 0.000355418 | 0.000318688 | tags=68%, list=1 5162/51166/294 | 5117 |
| 0.000732557 | 0.017522843 | 0.015711984 | tags=48%, list=7 125/128/27284/ | 2626 |
| 0.00127998  | 0.026660192 | 0.023905054 | tags=55%, list=1 4023/23586/641 | 4397 |
| 1.39E-08    | 2.62E-06    | 2.35E-06    | tags=51%, list=6 51474/9368/111 | 2018 |
| 0.00060523  | 0.015243865 | 0.013668522 | tags=71%, list=1 11332/80339/28 | 4359 |
| 0.000361136 | 0.010703996 | 0.009597815 | tags=42%, list=1 9619/1071/5007 | 281  |
| 0.000970139 | 0.021787714 | 0.019536111 | tags=30%, list=7 406977/7048/40 | 2695 |
| 0.000318088 | 0.009929495 | 0.008903354 | tags=53%, list=6 57835/10861/80 | 2370 |
| 0.000910622 | 0.020739105 | 0.018595868 | tags=45%, list=1 161/1213/1514/ | 5527 |
| 0.000908432 | 0.020739105 | 0.018595868 | tags=53%, list=1 9114/51606/534 | 5048 |
| 0.000908432 | 0.020739105 | 0.018595868 | tags=18%, list=4 84868/634/3271 | 1553 |
| 0.001503392 | 0.029288982 | 0.026262177 | tags=33%, list=4 3990/55937/330 | 1333 |
| 0.001140163 | 0.024466148 | 0.021937749 | tags=28%, list=1 54762/64241/31 | 281  |
| 7.66E-05    | 0.003558739 | 0.003190969 | tags=30%, list=1 10628/3176/848 | 4488 |
| 0.002323976 | 0.040581743 | 0.036387913 | tags=29%, list=3 55937/336/335/ | 1185 |
| 0.00054917  | 0.014480936 | 0.012984436 | tags=35%, list=4 3990/55937/407 | 1333 |
| 4.45E-07    | 5.00E-05    | 4.48E-05    | tags=74%, list=1 5160/4190/1431 | 6468 |
| 0.002490293 | 0.042838344 | 0.038411311 | tags=38%, list=8 4846/55163/484 | 2975 |
| 4.14E-07    | 4.78E-05    | 4.29E-05    | tags=39%, list=1 1355/211/3658/ | 3976 |
| 0.000172541 | 0.00636985  | 0.005711572 | tags=53%, list=1 6527/57210/264 | 3820 |
| 0.00034647  | 0.010386287 | 0.009312939 | tags=30%, list=3 55937/336/350/ | 1185 |
| 0.00034647  | 0.010386287 | 0.009312939 | tags=30%, list=3 55937/336/350/ | 1185 |
| 0.00047752  | 0.013176607 | 0.0118149   | tags=29%, list=4 27329/6620/330 | 1476 |
| 0.000436663 | 0.012356588 | 0.011079624 | tags=47%, list=3 9619/183/40701 | 1163 |
| 0.000436663 | 0.012356588 | 0.011079624 | tags=47%, list=3 9619/183/40701 | 1163 |
| 0.000436663 | 0.012356588 | 0.011079624 | tags=47%, list=3 9619/183/40701 | 1163 |
| 0.00154464  | 0.029734317 | 0.02666149  | tags=36%, list=4 3990/336/335/3 | 1333 |
| 0.001491681 | 0.029131024 | 0.026120543 | tags=21%, list=4 84868/634/3271 | 1553 |
| 0.001491681 | 0.029131024 | 0.026120543 | tags=21%, list=4 84868/634/3271 | 1553 |
| 0.001491681 | 0.029131024 | 0.026120543 | tags=79%, list=1 8801/2271/594/ | 5074 |
| 0.001491681 | 0.029131024 | 0.026120543 | tags=93%, list=2 9896/3631/5294 | 8294 |

|             |             |             |                                 |      |
|-------------|-------------|-------------|---------------------------------|------|
| 0.001892148 | 0.034610906 | 0.031034119 | tags=88%, list=2 1508/2730/1511 | 8838 |
| 0.001350459 | 0.02736456  | 0.024536631 | tags=36%, list=3 3949/6653/5591 | 1185 |
| 0.000711836 | 0.017128556 | 0.015358443 | tags=87%, list=1 10658/5914/161 | 5661 |
| 0.000437104 | 0.012356588 | 0.011079624 | tags=61%, list=7 3046/3050/3041 | 2441 |
| 6.28E-05    | 0.003040368 | 0.002726168 | tags=82%, list=2 5162/2954/5160 | 7762 |
| 0.001258238 | 0.026354535 | 0.023630984 | tags=88%, list=2 5162/2954/5160 | 7762 |
| 0.003123441 | 0.049907148 | 0.044749605 | tags=69%, list=1 117/801/808/10 | 5821 |
| 0.000549864 | 0.014480936 | 0.012984436 | tags=67%, list=4 230/5207/216/2 | 1525 |
| 0.003032618 | 0.048842066 | 0.043794592 | tags=69%, list=8 4860/6568/5660 | 2867 |
| 8.23E-05    | 0.003780406 | 0.003389728 | tags=42%, list=9 641372/10965/1 | 3399 |
| 0.000979751 | 0.021942621 | 0.01967501  | tags=71%, list=1 23409/1431/341 | 6602 |
| 0.000282246 | 0.00923871  | 0.008283956 | tags=67%, list=1 1359/2150/4311 | 4386 |
| 1.33E-05    | 0.000847469 | 0.000759889 | tags=35%, list=1 947/340348/590 | 3873 |
| 0.002519643 | 0.043068309 | 0.038617511 | tags=77%, list=2 2639/51166/604 | 7818 |
| 0.002643989 | 0.044683273 | 0.04006558  | tags=67%, list=1 1719/348751/11 | 4508 |
| 4.24E-05    | 0.002253552 | 0.002020663 | tags=76%, list=1 3155/64087/111 | 4359 |
| 4.24E-05    | 0.002253552 | 0.002020663 | tags=76%, list=1 3155/64087/111 | 4359 |
| 3.79E-05    | 0.002043265 | 0.001832108 | tags=48%, list=9 641372/283927  | 3399 |
| 0.000138488 | 0.005409043 | 0.004850058 | tags=59%, list=1 275/2653/2622  | 6333 |
| 0.00214906  | 0.038404542 | 0.03443571  | tags=75%, list=1 2639/51166/101 | 4600 |
| 0.000778947 | 0.018468591 | 0.016559996 | tags=81%, list=2 56267/51166/92 | 7649 |
| 0.001825619 | 0.033909607 | 0.030405294 | tags=46%, list=0 80155/23173/60 | 144  |
| 1.00E-10    | 3.85E-08    | 3.45E-08    | tags=65%, list=1 3155/6342/2360 | 4359 |
| 1.00E-10    | 3.85E-08    | 3.45E-08    | tags=65%, list=1 3155/6342/2360 | 4359 |
| 0.001735095 | 0.03247278  | 0.029116952 | tags=69%, list=1 135/5795/9353/ | 4761 |
| 0.001575985 | 0.030265657 | 0.02713792  | tags=42%, list=4 3990/336/335/3 | 1333 |
| 0.000386744 | 0.011329081 | 0.010158303 | tags=29%, list=0 395/5170/350/1 | 132  |
| 2.10E-05    | 0.001236838 | 0.00110902  | tags=37%, list=6 384/23576/4841 | 2042 |
| 0.000312455 | 0.009829573 | 0.008813758 | tags=50%, list=1 7057/3818/2160 | 273  |
| 0.000953364 | 0.021530581 | 0.019305551 | tags=69%, list=9 55217/223/6470 | 3343 |
| 0.001211815 | 0.02551438  | 0.022877653 | tags=58%, list=7 125/128/219/13 | 2626 |
| 0.002174813 | 0.038560005 | 0.034575107 | tags=50%, list=5 57818/5208/878 | 1787 |
| 0.002174813 | 0.038560005 | 0.034575107 | tags=50%, list=5 57818/5208/878 | 1787 |
| 0.00265281  | 0.044683273 | 0.04006558  | tags=73%, list=8 1359/4311/2028 | 2808 |
| 0.00265281  | 0.044683273 | 0.04006558  | tags=73%, list=8 1359/4311/2028 | 2808 |
| 1.74E-05    | 0.001063911 | 0.000953963 | tags=76%, list=1 501/55217/223/ | 3678 |
| 0.001964521 | 0.035772873 | 0.032076005 | tags=55%, list=9 112817/57026/1 | 3273 |
| 1.09E-05    | 0.000737923 | 0.000661664 | tags=39%, list=1 7450/3818/2160 | 273  |
| 0.001319986 | 0.02708651  | 0.024287315 | tags=50%, list=1 7057/5340/1361 | 219  |
| 0.001269702 | 0.026525948 | 0.023784683 | tags=80%, list=7 125/128/10170/ | 2626 |
| 0.000338547 | 0.01025151  | 0.00919209  | tags=42%, list=0 9619/336/335/3 | 144  |
| 5.30E-05    | 0.0026618   | 0.002386722 | tags=50%, list=6 693120/81693/1 | 2011 |
| 0.00018769  | 0.006772593 | 0.006072695 | tags=54%, list=7 10965/26027/64 | 2455 |
| 0.000239025 | 0.008085847 | 0.007250233 | tags=33%, list=3 288/4544/23630 | 919  |
| 0.000856897 | 0.02002315  | 0.017953902 | tags=60%, list=7 10965/26027/64 | 2455 |
| 0.000137763 | 0.005406857 | 0.004848098 | tags=46%, list=0 4023/336/350/3 | 144  |

|             |             |             |                                |      |
|-------------|-------------|-------------|--------------------------------|------|
| 0.000148681 | 0.005591095 | 0.005013296 | tags=40%, list=4948/336/335/34 | 1574 |
| 0.000148681 | 0.005591095 | 0.005013296 | tags=40%, list=4948/336/335/34 | 1574 |

**Table S11: Information of GSEA in KEGG database**

| ID       | Description       | setSize | enrichmentScore | NES          | pvalue      |
|----------|-------------------|---------|-----------------|--------------|-------------|
| hsa04144 | Endocytosis       | 252     | -0.282012545    | -1.242419135 | 0.012332441 |
| hsa00190 | Oxidative phosp   | 120     | -0.338767279    | -1.272601734 | 0.013246499 |
| hsa04142 | Lysosome          | 128     | -0.353624688    | -1.388219525 | 0.000857348 |
| hsa01522 | Endocrine resist  | 96      | -0.362042734    | -1.380261202 | 0.008531749 |
| hsa04068 | FoxO signaling    | 129     | -0.371516669    | -1.459658751 | 0.000894663 |
| hsa03018 | RNA degradatio    | 79      | -0.374260108    | -1.411492441 | 0.009750284 |
| hsa00562 | Inositol phosph   | 73      | -0.424288396    | -1.484360238 | 0.000917981 |
| hsa01230 | Biosynthesis of   | 75      | -0.440004744    | -1.571830073 | 0.000533509 |
| hsa01240 | Biosynthesis of   | 152     | -0.44554393     | -1.884765139 | 2.11E-07    |
| hsa00330 | Arginine and pr   | 50      | -0.511757662    | -1.754011548 | 0.000794074 |
| hsa00380 | Tryptophan met    | 42      | -0.525041257    | -1.702926109 | 0.00085919  |
| hsa00410 | beta-Alanine me   | 30      | -0.542237103    | -1.671974167 | 0.005406014 |
| hsa01040 | Biosynthesis of   | 27      | -0.545234171    | -1.647255331 | 0.013714367 |
| hsa01212 | Fatty acid metab  | 57      | -0.552885076    | -1.948216529 | 4.60E-05    |
| hsa00970 | Aminoacyl-tRN     | 25      | -0.569460424    | -1.72697163  | 0.003020524 |
| hsa00983 | Drug metabolisr   | 79      | -0.573694289    | -2.163642704 | 2.15E-07    |
| hsa01200 | Carbon metabol    | 117     | -0.576791367    | -2.048271662 | 2.25E-10    |
| hsa00860 | Porphyrin and c   | 41      | -0.588467597    | -1.859146344 | 0.000405591 |
| hsa00350 | Tyrosine metabo   | 36      | -0.598817665    | -1.926966335 | 0.000251588 |
| hsa00040 | Pentose and glu   | 33      | -0.603943628    | -1.885506187 | 0.000347508 |
| hsa00010 | Glycolysis / Glu  | 67      | -0.60796331     | -2.08399488  | 8.60E-08    |
| hsa00650 | Butanoate metak   | 28      | -0.613626549    | -1.890199764 | 0.001107311 |
| hsa00140 | Steroid hormon    | 60      | -0.616100057    | -2.219987536 | 6.61E-07    |
| hsa00260 | Glycine, serine & | 40      | -0.625826051    | -1.96699196  | 3.33E-05    |
| hsa04146 | Peroxisome        | 83      | -0.641056618    | -2.33802235  | 2.46E-10    |
| hsa00830 | Retinol metaboli  | 67      | -0.642932771    | -2.20386425  | 6.66E-09    |
| hsa00980 | Metabolism of x   | 75      | -0.644529388    | -2.302453984 | 1.45E-09    |
| hsa00900 | Terpenoid backl   | 22      | -0.647000263    | -1.873208815 | 0.0040463   |
| hsa00053 | Ascorbate and a   | 30      | -0.650505682    | -2.005817544 | 0.000171744 |
| hsa03320 | PPAR signaling    | 74      | -0.661397557    | -2.344075312 | 4.64E-10    |
| hsa00220 | Arginine biosyn   | 22      | -0.668965493    | -1.936803014 | 0.002291762 |
| hsa00620 | Pyruvate metabo   | 39      | -0.681707373    | -2.176231908 | 1.76E-06    |
| hsa00982 | Drug metabolisr   | 69      | -0.685718662    | -2.384265958 | 6.92E-10    |
| hsa00640 | Propanoate metak  | 33      | -0.730814978    | -2.281597321 | 1.34E-06    |
| hsa00072 | Synthesis and de  | 10      | -0.744893969    | -1.861303815 | 0.012093599 |
| hsa00071 | Fatty acid degra  | 43      | -0.759754711    | -2.485561789 | 4.19E-09    |
| hsa00630 | Glyoxylate and    | 29      | -0.760796042    | -2.340278625 | 1.91E-06    |
| hsa00280 | Valine, leucine & | 47      | -0.774775139    | -2.646659515 | 1.00E-10    |
| hsa00120 | Primary bile aci  | 17      | -0.775633048    | -2.139060366 | 0.000243527 |
| hsa00020 | Citrate cycle (TC | 30      | -0.782898403    | -2.414047097 | 1.81E-07    |

| p.adjust    | qvalues     | leading_edge     | core_enrichmen | rank |
|-------------|-------------|------------------|----------------|------|
| 0.043488081 | 0.027671128 | tags=44%, list=2 | 157/26052/2290 | 9280 |
| 0.045513612 | 0.028959957 | tags=31%, list=1 | 4724/1353/534/ | 5767 |
| 0.004241706 | 0.002698964 | tags=41%, list=2 | 6609/2760/175/ | 8142 |
| 0.032664411 | 0.020784111 | tags=48%, list=2 | 5595/5601/207/ | 8075 |
| 0.004241706 | 0.002698964 | tags=45%, list=1 | 11345/1432/408 | 6784 |
| 0.036292725 | 0.023092778 | tags=49%, list=2 | 29883/54464/51 | 8746 |
| 0.004241706 | 0.002698964 | tags=52%, list=2 | 8776/5298/5170 | 9276 |
| 0.002978757 | 0.00189536  | tags=39%, list=1 | 2806/1491/1431 | 6088 |
| 2.40E-06    | 1.53E-06    | tags=34%, list=1 | 51004/125061/1 | 4786 |
| 0.004241706 | 0.002698964 | tags=50%, list=1 | 4953/26/8659/4 | 4946 |
| 0.004241706 | 0.002698964 | tags=55%, list=1 | 26/125061/2349 | 4868 |
| 0.021306057 | 0.013556878 | tags=53%, list=1 | 35/501/3030/51 | 4002 |
| 0.045943129 | 0.029233256 | tags=37%, list=1 | 6342/3295/5149 | 4165 |
| 0.000342779 | 0.000218108 | tags=40%, list=1 | 23205/84869/61 | 4394 |
| 0.012648443 | 0.008048106 | tags=72%, list=2 | 57038/2193/283 | 9500 |
| 2.40E-06    | 1.53E-06    | tags=32%, list=1 | 1571/7172/8824 | 3526 |
| 1.10E-08    | 6.99E-09    | tags=57%, list=1 | 5211/230/2098/ | 6944 |
| 0.002363009 | 0.001503564 | tags=44%, list=1 | 124454/211/730 | 3608 |
| 0.00160537  | 0.001021484 | tags=39%, list=8 | 4129/125/3081/ | 2988 |
| 0.00211664  | 0.001346802 | tags=45%, list=5 | 51084/6652/791 | 1725 |
| 1.28E-06    | 8.15E-07    | tags=40%, list=1 | 130589/669/522 | 4027 |
| 0.00494599  | 0.003147095 | tags=61%, list=1 | 3155/35/3030/5 | 4359 |
| 6.82E-06    | 4.34E-06    | tags=33%, list=4 | 79799/54658/61 | 1350 |
| 0.000262177 | 0.000166821 | tags=48%, list=1 | 10993/669/5221 | 4226 |
| 1.10E-08    | 6.99E-09    | tags=49%, list=1 | 8504/5189/3418 | 5271 |
| 1.12E-07    | 7.10E-08    | tags=49%, list=7 | 51109/125/8228 | 2645 |
| 3.23E-08    | 2.05E-08    | tags=44%, list=9 | 2939/7364/5451 | 3239 |
| 0.016430432 | 0.010454556 | tags=41%, list=1 | 79947/2224/571 | 5551 |
| 0.001211244 | 0.000770705 | tags=60%, list=4 | 7364/54578/221 | 1404 |
| 1.55E-08    | 9.88E-09    | tags=49%, list=1 | 4023/23205/634 | 4397 |
| 0.009906328 | 0.006303319 | tags=64%, list=1 | 2806/2744/95/2 | 6088 |
| 1.57E-05    | 1.00E-05    | tags=67%, list=2 | 2739/5162/4199 | 8086 |
| 1.85E-08    | 1.18E-08    | tags=48%, list=9 | 2939/7364/5451 | 3239 |
| 1.29E-05    | 8.18E-06    | tags=67%, list=1 | 55862/32/8801/ | 5505 |
| 0.043488081 | 0.027671128 | tags=70%, list=1 | 56898/3155/541 | 5020 |
| 8.03E-08    | 5.11E-08    | tags=60%, list=1 | 35/501/3030/51 | 4002 |
| 1.60E-05    | 1.02E-05    | tags=66%, list=1 | 275/2653/4190/ | 6333 |
| 1.10E-08    | 6.99E-09    | tags=74%, list=1 | 3155/64087/351 | 4359 |
| 0.00160537  | 0.001021484 | tags=71%, list=1 | 6342/23600/109 | 4165 |
| 2.40E-06    | 1.53E-06    | tags=83%, list=1 | 5160/4190/1431 | 6468 |



**Table S12: Information of Univariate Cox regression analysis for the influencing factors of the prediction model**

| id        | HR          | HR.95L      | HR.95H      | pvalue   |
|-----------|-------------|-------------|-------------|----------|
| age       | 1.029703838 | 1.015880474 | 1.0437153   | 2.19E-05 |
| grade     | 2.282634127 | 1.840530804 | 2.830932548 | 5.73E-14 |
| stage     | 1.925763251 | 1.676994202 | 2.211435254 | 1.60E-20 |
| T         | 1.972554424 | 1.660951738 | 2.3426153   | 9.65E-15 |
| M         | 4.499325396 | 3.25414987  | 6.220957803 | 9.22E-20 |
| riskScore | 4.599414555 | 3.284982951 | 6.439794228 | 6.33E-19 |

**Table S13: Information of Multivariate Cox regression analysis for the influencing factors of the prediction model**

| id        | HR          | HR.95L      | HR.95H      | pvalue      |
|-----------|-------------|-------------|-------------|-------------|
| age       | 1.030638635 | 1.01544576  | 1.046058823 | 6.81E-05    |
| grade     | 1.333392181 | 1.04228896  | 1.705798273 | 0.022047219 |
| stage     | 1.69827253  | 1.062221658 | 2.7151862   | 0.02696064  |
| T         | 0.858816975 | 0.556418057 | 1.325561936 | 0.491904517 |
| M         | 1.279259965 | 0.640501426 | 2.555038898 | 0.485324592 |
| riskScore | 3.272507928 | 2.14905146  | 4.98327208  | 3.29E-08    |

**Table S14: Tumor mutation burden (TMB) value of each samples**

| id           | TMB         |
|--------------|-------------|
| TCGA-BP-5168 | 2.289473684 |
| TCGA-CJ-4913 | 0.973684211 |
| TCGA-BP-5010 | 1.263157895 |
| TCGA-B0-5692 | 1.394736842 |
| TCGA-G6-A8L6 | 1.315789474 |
| TCGA-B0-5077 | 1.026315789 |
| TCGA-B4-5843 | 0.868421053 |
| TCGA-B8-5158 | 0.842105263 |
| TCGA-A3-3380 | 0.631578947 |
| TCGA-6D-AA2E | 0.368421053 |
| TCGA-A3-3346 | 1.789473684 |
| TCGA-A3-3385 | 1.263157895 |
| TCGA-DV-5565 | 1.236842105 |
| TCGA-CJ-4901 | 0.921052632 |
| TCGA-CJ-5679 | 1.921052632 |
| TCGA-BP-5006 | 0.710526316 |
| TCGA-CJ-6027 | 1.526315789 |
| TCGA-B8-4153 | 1.157894737 |
| TCGA-CZ-5457 | 1.552631579 |
| TCGA-BP-4177 | 0.184210526 |
| TCGA-B8-4143 | 1.210526316 |
| TCGA-B8-5551 | 0.710526316 |
| TCGA-A3-A6NJ | 1.052631579 |
| TCGA-B0-4827 | 1.684210526 |
| TCGA-BP-4965 | 1.105263158 |
| TCGA-CZ-4853 | 2.263157895 |
| TCGA-B2-5641 | 1.289473684 |
| TCGA-CJ-4869 | 1.578947368 |
| TCGA-CJ-5689 | 1.394736842 |
| TCGA-BP-5196 | 0.947368421 |
| TCGA-CZ-5461 | 1.447368421 |
| TCGA-B0-5119 | 1.921052632 |
| TCGA-B0-5121 | 0.894736842 |
| TCGA-B0-5698 | 1.526315789 |
| TCGA-A3-A6NL | 0.789473684 |
| TCGA-BP-5201 | 0.868421053 |
| TCGA-CJ-6030 | 2.236842105 |
| TCGA-B8-5163 | 1.289473684 |
| TCGA-A3-3316 | 0.868421053 |
| TCGA-A3-3374 | 0.210526316 |
| TCGA-BP-4964 | 1.394736842 |
| TCGA-MW-A4EC | 0.789473684 |
| TCGA-A3-3322 | 1.026315789 |
| TCGA-BP-5181 | 1.184210526 |
| TCGA-A3-3370 | 0.789473684 |
| TCGA-BP-4960 | 1.236842105 |
| TCGA-CJ-4903 | 0.973684211 |

|              |             |
|--------------|-------------|
| TCGA-BP-5000 | 0.763157895 |
| TCGA-CW-6097 | 0.236842105 |
| TCGA-CZ-5989 | 0.763157895 |
| TCGA-CJ-6028 | 0.815789474 |
| TCGA-BP-5004 | 0.947368421 |
| TCGA-CZ-5458 | 0.552631579 |
| TCGA-B8-4151 | 1.184210526 |
| TCGA-BP-4998 | 0.631578947 |
| TCGA-B8-5553 | 1           |
| TCGA-DV-5566 | 0.842105263 |
| TCGA-B0-5099 | 1.315789474 |
| TCGA-B0-5709 | 1.342105263 |
| TCGA-B2-5633 | 0.921052632 |
| TCGA-3Z-A93Z | 1.789473684 |
| TCGA-BP-5173 | 1.552631579 |
| TCGA-B8-A54E | 0.947368421 |
| TCGA-CW-5589 | 1           |
| TCGA-BP-4992 | 0.815789474 |
| TCGA-B0-4700 | 0.263157895 |
| TCGA-BP-4782 | 1.684210526 |
| TCGA-DV-A4VZ | 0.210526316 |
| TCGA-CZ-5452 | 0.605263158 |
| TCGA-BP-5183 | 0.973684211 |
| TCGA-B0-5109 | 0.973684211 |
| TCGA-BP-5195 | 1.368421053 |
| TCGA-A3-3376 | 0.815789474 |
| TCGA-B0-5088 | 1.026315789 |
| TCGA-B2-4102 | 1.578947368 |
| TCGA-BP-5190 | 0.815789474 |
| TCGA-AK-3465 | 0.578947368 |
| TCGA-CZ-5463 | 1           |
| TCGA-BP-5194 | 0.394736842 |
| TCGA-BP-4989 | 1.236842105 |
| TCGA-B0-5697 | 1.052631579 |
| TCGA-B0-5085 | 1.342105263 |
| TCGA-BP-5198 | 1.605263158 |
| TCGA-B2-5639 | 1.052631579 |
| TCGA-B0-5703 | 1.526315789 |
| TCGA-A3-A8CQ | 0.657894737 |
| TCGA-B0-5696 | 0.921052632 |
| TCGA-CJ-4923 | 0.868421053 |
| TCGA-BP-4770 | 1.078947368 |
| TCGA-BP-4973 | 0.631578947 |
| TCGA-B8-5549 | 1.105263158 |
| TCGA-B0-5711 | 0.763157895 |
| TCGA-B0-5084 | 1           |
| TCGA-A3-3363 | 0.973684211 |
| TCGA-T7-A92I | 0.684210526 |
| TCGA-BP-4967 | 1.342105263 |

|              |             |
|--------------|-------------|
| TCGA-CJ-5671 | 1.131578947 |
| TCGA-AK-3453 | 0.184210526 |
| TCGA-DV-5573 | 0.578947368 |
| TCGA-G6-A8L8 | 1.5         |
| TCGA-AK-3443 | 0.105263158 |
| TCGA-BP-4995 | 0.868421053 |
| TCGA-BP-4983 | 1.131578947 |
| TCGA-CZ-5455 | 0.684210526 |
| TCGA-B8-4621 | 1.763157895 |
| TCGA-CJ-4899 | 0.605263158 |
| TCGA-CJ-5681 | 0.342105263 |
| TCGA-A3-3358 | 1.289473684 |
| TCGA-CZ-5469 | 0.894736842 |
| TCGA-BP-5192 | 1.052631579 |
| TCGA-DV-5567 | 0.315789474 |
| TCGA-A3-3387 | 1.368421053 |
| TCGA-BP-5008 | 0.710526316 |
| TCGA-CZ-5454 | 0.526315789 |
| TCGA-BP-5189 | 1           |
| TCGA-B0-5075 | 1.921052632 |
| TCGA-CZ-4866 | 1.605263158 |
| TCGA-MM-A564 | 1.921052632 |
| TCGA-CJ-4882 | 1.368421053 |
| TCGA-CW-5583 | 0.526315789 |
| TCGA-A3-3326 | 0.973684211 |
| TCGA-B0-5713 | 2.026315789 |
| TCGA-BP-4971 | 0.763157895 |
| TCGA-B0-5695 | 1.131578947 |
| TCGA-A3-3317 | 1.394736842 |
| TCGA-A3-3378 | 1.184210526 |
| TCGA-BP-4968 | 0.868421053 |
| TCGA-B0-4842 | 1.105263158 |
| TCGA-B0-5701 | 2.184210526 |
| TCGA-A3-3382 | 2.026315789 |
| TCGA-B0-5694 | 1.342105263 |
| TCGA-A3-3308 | 1.605263158 |
| TCGA-B8-A54J | 1.315789474 |
| TCGA-CZ-5470 | 0.815789474 |
| TCGA-A3-A8OW | 0.447368421 |
| TCGA-B0-5690 | 1.052631579 |
| TCGA-DV-A4VX | 1.763157895 |
| TCGA-BP-4962 | 0.736842105 |
| TCGA-CW-6090 | 1.947368421 |
| TCGA-BP-5007 | 0.578947368 |
| TCGA-CZ-4864 | 1.473684211 |
| TCGA-GK-A6C7 | 2.026315789 |
| TCGA-A3-3372 | 1.184210526 |
| TCGA-G6-A5PC | 1.184210526 |
| TCGA-A3-3320 | 1.605263158 |

|              |             |
|--------------|-------------|
| TCGA-CW-5581 | 1.263157895 |
| TCGA-CZ-5456 | 1.315789474 |
| TCGA-CZ-4865 | 1.789473684 |
| TCGA-G6-A8L7 | 1.394736842 |
| TCGA-CJ-6032 | 0.973684211 |
| TCGA-BP-4981 | 0.868421053 |
| TCGA-B0-5113 | 0.684210526 |
| TCGA-A3-3357 | 1.868421053 |
| TCGA-CJ-5683 | 1.236842105 |
| TCGA-DV-5568 | 0.289473684 |
| TCGA-CZ-4859 | 1.894736842 |
| TCGA-B0-5107 | 1.210526316 |
| TCGA-CJ-5672 | 1.947368421 |
| TCGA-BP-5001 | 0.631578947 |
| TCGA-B0-5712 | 1.894736842 |
| TCGA-CW-5587 | 1.315789474 |
| TCGA-B8-5546 | 0.184210526 |
| TCGA-B0-4945 | 0.842105263 |
| TCGA-BP-4987 | 0.447368421 |
| TCGA-B0-5699 | 0.789473684 |
| TCGA-AK-3447 | 0.394736842 |
| TCGA-B4-5844 | 1.210526316 |
| TCGA-A3-3383 | 1.131578947 |
| TCGA-B2-5636 | 0.342105263 |
| TCGA-B0-5812 | 0.868421053 |
| TCGA-BP-5176 | 2.447368421 |
| TCGA-B0-5402 | 1.236842105 |
| TCGA-A3-3367 | 1.263157895 |
| TCGA-A3-3311 | 1.157894737 |
| TCGA-BP-4977 | 0.842105263 |
| TCGA-B8-A54F | 0.5         |
| TCGA-BP-4963 | 1.631578947 |
| TCGA-BP-5186 | 0.657894737 |
| TCGA-B4-5835 | 1.473684211 |
| TCGA-CJ-5678 | 1           |
| TCGA-B8-5164 | 1.605263158 |
| TCGA-CZ-5987 | 1.026315789 |
| TCGA-A3-3373 | 1.184210526 |
| TCGA-EU-5906 | 1.263157895 |
| TCGA-CJ-5682 | 1.552631579 |
| TCGA-B0-5097 | 1.157894737 |
| TCGA-B8-5159 | 1.078947368 |
| TCGA-CZ-5466 | 1.368421053 |
| TCGA-B0-5707 | 0.763157895 |
| TCGA-BP-5191 | 1.157894737 |
| TCGA-BP-4760 | 0.131578947 |
| TCGA-A3-3331 | 1.315789474 |
| TCGA-B8-5165 | 0.289473684 |
| TCGA-BP-5169 | 0.973684211 |

|              |             |
|--------------|-------------|
| TCGA-CJ-6033 | 1.447368421 |
| TCGA-B8-4622 | 1.078947368 |
| TCGA-B4-5834 | 0.578947368 |
| TCGA-BP-4988 | 0.552631579 |
| TCGA-B0-5117 | 0.210526316 |
| TCGA-CJ-4916 | 0.921052632 |
| TCGA-BP-5174 | 0.868421053 |
| TCGA-B8-5545 | 0.394736842 |
| TCGA-CJ-4905 | 1.052631579 |
| TCGA-B0-5702 | 0.973684211 |
| TCGA-BP-5170 | 0.842105263 |
| TCGA-B0-5092 | 0.973684211 |
| TCGA-CW-6087 | 0.921052632 |
| TCGA-CZ-5982 | 0.868421053 |
| TCGA-B0-5108 | 0.815789474 |
| TCGA-CJ-4900 | 1.105263158 |
| TCGA-B2-5635 | 1.052631579 |
| TCGA-BP-5175 | 0.736842105 |
| TCGA-BP-4972 | 0.736842105 |
| TCGA-A3-A8OV | 3.026315789 |
| TCGA-CW-5588 | 0.921052632 |
| TCGA-B8-5550 | 1.894736842 |
| TCGA-B8-4146 | 0.710526316 |
| TCGA-CJ-4904 | 0.763157895 |
| TCGA-CZ-5460 | 1.289473684 |
| TCGA-BP-5185 | 1.710526316 |
| TCGA-CZ-4856 | 1.078947368 |
| TCGA-B4-5836 | 1.236842105 |
| TCGA-B0-5098 | 13.47368421 |
| TCGA-EU-5905 | 1.289473684 |
| TCGA-BP-5200 | 0.842105263 |
| TCGA-CJ-6031 | 1.394736842 |
| TCGA-B0-5120 | 1           |
| TCGA-BP-4982 | 0.736842105 |
| TCGA-CZ-5459 | 1.921052632 |
| TCGA-A3-3313 | 1.868421053 |
| TCGA-EU-5904 | 0.710526316 |
| TCGA-BP-5184 | 0.526315789 |
| TCGA-BP-4999 | 0.973684211 |
| TCGA-B4-5377 | 0.789473684 |
| TCGA-B8-A54K | 0.289473684 |
| TCGA-A3-A6NI | 1.605263158 |
| TCGA-BP-4961 | 0.657894737 |
| TCGA-CJ-5677 | 1.473684211 |
| TCGA-CZ-5465 | 2.263157895 |
| TCGA-B0-5102 | 0.921052632 |
| TCGA-BP-5180 | 0.894736842 |
| TCGA-CZ-5988 | 0.789473684 |
| TCGA-BP-4970 | 0.605263158 |

|              |             |
|--------------|-------------|
| TCGA-CZ-5984 | 0.842105263 |
| TCGA-B8-5552 | 0.578947368 |
| TCGA-B0-5083 | 0.131578947 |
| TCGA-CJ-4902 | 1.236842105 |
| TCGA-B8-A54H | 1.5         |
| TCGA-BP-5009 | 0.868421053 |
| TCGA-B0-5705 | 1.605263158 |
| TCGA-CJ-5676 | 1.157894737 |
| TCGA-BP-4974 | 0.605263158 |
| TCGA-B0-5095 | 1.5         |
| TCGA-CZ-5985 | 1.052631579 |
| TCGA-CZ-5468 | 2.394736842 |
| TCGA-AS-3777 | 0.289473684 |
| TCGA-B0-5700 | 1.473684211 |
| TCGA-BP-4975 | 0.315789474 |
| TCGA-CJ-4920 | 3.078947368 |
| TCGA-B0-5094 | 1.736842105 |
| TCGA-MM-A84U | 1.684210526 |
| TCGA-A3-3365 | 0.789473684 |
| TCGA-B0-5691 | 1.157894737 |
| TCGA-B0-5100 | 0.657894737 |
| TCGA-MM-A563 | 1.026315789 |
| TCGA-BP-5182 | 1.315789474 |
| TCGA-AK-3427 | 0.210526316 |
| TCGA-CJ-4908 | 0.5         |
| TCGA-B0-4823 | 2.210526316 |
| TCGA-AK-3455 | 1.263157895 |
| TCGA-B0-5104 | 1.078947368 |
| TCGA-BP-4795 | 0.315789474 |
| TCGA-BP-4993 | 1.026315789 |
| TCGA-CW-5580 | 1.710526316 |
| TCGA-DV-5575 | 0.447368421 |
| TCGA-B2-A4SR | 0.868421053 |
| TCGA-BP-4985 | 1.447368421 |
| TCGA-CZ-5453 | 1.447368421 |
| TCGA-A3-3319 | 1.5         |
| TCGA-B8-A54I | 1.210526316 |
| TCGA-B8-A54D | 1.184210526 |
| TCGA-B8-A7U6 | 1           |
| TCGA-BP-5202 | 0.763157895 |
| TCGA-CW-5585 | 0.921052632 |
| TCGA-AK-3440 | 0.394736842 |
| TCGA-B0-5116 | 1.263157895 |
| TCGA-BP-5178 | 1.157894737 |
| TCGA-BP-5199 | 1.578947368 |
| TCGA-CJ-5686 | 1.263157895 |
| TCGA-CZ-5462 | 1.315789474 |
| TCGA-A3-A8OU | 1.473684211 |
| TCGA-AK-3444 | 1.815789474 |



|              |             |
|--------------|-------------|
| TCGA-DV-5574 | 0.184210526 |
| TCGA-BP-4801 | 1.289473684 |
| TCGA-B0-5706 | 1.131578947 |
| TCGA-CZ-5467 | 1.052631579 |
| TCGA-CJ-5675 | 1.210526316 |
| TCGA-B4-5838 | 1.342105263 |
| TCGA-B0-5096 | 1.605263158 |
| TCGA-AS-3778 | 1.184210526 |
| TCGA-DV-5569 | 0.157894737 |
| TCGA-B0-5399 | 0.710526316 |
| TCGA-CJ-4912 | 1.631578947 |
| TCGA-B0-5693 | 0.815789474 |
| TCGA-B8-A8YJ | 0.026315789 |
| TCGA-BP-4976 | 1.868421053 |
| TCGA-A3-A8OX | 0.157894737 |
| TCGA-B0-5710 | 0.789473684 |
| TCGA-EU-5907 | 0.973684211 |
| TCGA-CZ-5986 | 1.157894737 |
| TCGA-B0-5081 | 0.447368421 |
| TCGA-BP-5187 | 1           |
| TCGA-CW-5591 | 0.631578947 |
| TCGA-B0-5110 | 1.236842105 |
| TCGA-DV-5576 | 0.026315789 |
| TCGA-CJ-4918 | 1.5         |
| TCGA-CJ-5684 | 0.789473684 |
| TCGA-BP-4986 | 0.789473684 |
| TCGA-BP-5177 | 0.894736842 |
| TCGA-B4-5832 | 1.157894737 |
| TCGA-B8-A54G | 0.789473684 |
| TCGA-DV-A4W0 | 1.342105263 |
| TCGA-CJ-5680 | 0.973684211 |
| TCGA-A3-A6NN | 2.131578947 |
| TCGA-B0-5106 | 1.736842105 |
| TCGA-CW-6093 | 2.184210526 |
| TCGA-B2-4101 | 0.763157895 |
| TCGA-CJ-4907 | 1.131578947 |
| TCGA-B8-5162 | 1.210526316 |
| TCGA-CZ-4863 | 0.815789474 |
| TCGA-BP-4991 | 0.842105263 |
| TCGA-B8-4148 | 0.657894737 |
| TCGA-CZ-5451 | 1.657894737 |
| TCGA-B0-5400 | 0.605263158 |
| TCGA-B0-5115 | 1.236842105 |
| TCGA-A3-3323 | 0.947368421 |
